# Supplementary material for: Multi-omic landscape of rheumatoid arthritis: re-evaluation of drug adverse effects
Source: Front Cell Dev Biol. 2014 Nov 4;2:59. doi: 10.3389/fcell.2014.00059 (PMC4220167; doi:10.3389/fcell.2014.00059)
Supplement: Supplementary file 3 [file DataSheet2.XLSX]

## Sheet: Table S15
Core Interactome, components and topological parameters
Uniprot ID	Uniprot name	Canonical Gene name	Description	Betweenness Centrality	Closeness Centrality	Degree	Stress
Q14164	IKKE_HUMAN	IKKE	Inhibitor of nuclear factor kappa-B kinase subunit epsilon	0.0150727	0.367016	138	3212328
P03372	ESR1_HUMAN	ESR1	Estrogen receptor	0.0149883	0.391172	126	3121916
P40763	STAT3_HUMAN	STAT3	Signal transducer and activator of transcription 3	0.014129	0.379352	100	2787752
Q12933	TRAF2_HUMAN	TRAF2	TNF receptor-associated factor 2	0.012129	0.353175	108	2441746
Q04206	TF65_HUMAN	TF65	Transcription factor p65	0.0119151	0.376303	151	2787726
Q03135	CAV1_HUMAN	CAV1	Caveolin-1	0.010725	0.375691	78	1912012
P43405	KSYK_HUMAN	KSYK	Tyrosine-protein kinase SYK	0.00952654	0.365661	81	1850708
P23458	JAK1_HUMAN	JAK1	Tyrosine-protein kinase JAK1	0.00871581	0.359291	75	1744726
P06493	CDC2_HUMAN	CDC2	Cell division control protein 2 homolog	0.00864986	0.363398	91	1566248
P42224	STAT1_HUMAN	STAT1	Signal transducer and activator of transcription 1-alpha/beta	0.00829665	0.368892	71	1722894
P27361	MK03_HUMAN	MK03	Mitogen-activated protein kinase 3	0.00802031	0.376303	103	1699128
Q9Y6K9	NEMO_HUMAN	NEMO	NF-kappa-B essential modulator	0.00753149	0.366086	118	1789110
P50148	GNAQ_HUMAN	GNAQ	Guanine nucleotide-binding protein G(q) subunit alpha	0.00707965	0.31566	49	1178874
O60674	JAK2_HUMAN	JAK2	Tyrosine-protein kinase JAK2	0.00706849	0.363894	88	1423162
P11021	GRP78_HUMAN	GRP78	78 kDa glucose-regulated protein	0.00677833	0.375162	72	1446860
Q06187	BTK_HUMAN	BTK	Tyrosine-protein kinase BTK	0.00625959	0.350886	59	1079800
P01730	CD4_HUMAN	CD4	T-cell surface glycoprotein CD4	0.00560824	0.351848	70	1189158
P27797	CALR_HUMAN	CALR	Calreticulin	0.00533279	0.33231	40	858742
P68366	TBA4A_HUMAN	TBA4A	Tubulin alpha-4A chain	0.00448465	0.363703	43	818106
P60953	CDC42_HUMAN	CDC42	Cell division control protein 42 homolog	0.00440081	0.357585	71	814344
P19838	NFKB1_HUMAN	NFKB1	Nuclear factor NF-kappa-B p105 subunit	0.0043749	0.361616	103	1196942
O15111	IKKA_HUMAN	IKKA	Inhibitor of nuclear factor kappa-B kinase subunit alpha	0.00424545	0.372621	89	1095664
Q00610	CLH1_HUMAN	CLH1	Clathrin heavy chain 1	0.00379438	0.348241	55	844174
P10721	KIT_HUMAN	KIT	Mast/stem cell growth factor receptor	0.00378077	0.349647	59	770926
O14920	IKKB_HUMAN	IKKB	Inhibitor of nuclear factor kappa-B kinase subunit beta	0.00350781	0.367055	80	925298
P20333	TNR1B_HUMAN	TNR1B	Tumor necrosis factor receptor superfamily member 1B	0.00342317	0.341278	56	768676
P40189	IL6RB_HUMAN	IL6RB	Interleukin-6 receptor subunit beta	0.00332977	0.333237	32	536924
P05771	KPCB_HUMAN	KPCB	Protein kinase C beta type	0.00320311	0.343375	55	624004
P25963	IKBA_HUMAN	IKBA	NF-kappa-B inhibitor alpha	0.00318889	0.363436	71	764798
P08253	MMP2_HUMAN	MMP2	72 kDa type IV collagenase	0.00310566	0.309513	27	438724
P35968	VGFR2_HUMAN	VGFR2	Vascular endothelial growth factor receptor 2	0.0030626	0.348171	43	598970
P14780	MMP9_HUMAN	MMP9	Matrix metalloproteinase-9	0.00288101	0.285655	30	514972
P50750	CDK9_HUMAN	CDK9	Cell division protein kinase 9	0.00243219	0.328405	27	378518
P19793	RXRA_HUMAN	RXRA	Retinoic acid receptor RXR-alpha	0.00239876	0.341379	53	491524
P11831	SRF_HUMAN	SRF	Serum response factor	0.00235372	0.333301	39	429408
Q13077	TRAF1_HUMAN	TRAF1	TNF receptor-associated factor 1	0.00229442	0.337062	50	626166
Q99558	M3K14_HUMAN	M3K14	Mitogen-activated protein kinase kinase kinase 14	0.00222447	0.354041	74	657030
Q13233	M3K1_HUMAN	M3K1	Mitogen-activated protein kinase kinase kinase 1	0.0021435	0.360562	67	576630
P08575	CD45_HUMAN	CD45	Leukocyte common antigen	0.00196964	0.338412	38	333040
P08581	MET_HUMAN	MET	Hepatocyte growth factor receptor	0.00192618	0.349365	32	317312
P29466	CASP1_HUMAN	CASP1	Caspase-1	0.00190994	0.327041	32	313406
P25942	TNR5_HUMAN	TNR5	Tumor necrosis factor receptor superfamily member 5	0.00175649	0.330946	25	281168
P10747	CD28_HUMAN	CD28	T-cell-specific surface glycoprotein CD28	0.00173568	0.317192	15	324188
P18031	PTN1_HUMAN	PTN1	Tyrosine-protein phosphatase non-receptor type 1	0.00171635	0.363246	48	435458
Q99683	M3K5_HUMAN	M3K5	Mitogen-activated protein kinase kinase kinase 5	0.00169617	0.339406	38	339128
Q00653	NFKB2_HUMAN	NFKB2	Nuclear factor NF-kappa-B p100 subunit	0.00165822	0.344913	90	563700
P17948	VGFR1_HUMAN	VGFR1	Vascular endothelial growth factor receptor 1	0.00165334	0.335431	26	316446
Q12778	FOXO1_HUMAN	FOXO1	Forkhead box protein O1	0.00154537	0.340206	26	301954
P50281	MMP14_HUMAN	MMP14	Matrix metalloproteinase-14	0.00152253	0.310095	16	262758
O00206	TLR4_HUMAN	TLR4	Toll-like receptor 4	0.00152223	0.311349	18	255938
Q13114	TRAF3_HUMAN	TRAF3	TNF receptor-associated factor 3	0.00150898	0.323469	38	327480
P02545	LMNA_HUMAN	LMNA	Lamin-A/C	0.00146296	0.357438	32	326916
P06756	ITAV_HUMAN	ITAV	Integrin alpha-V	0.00145927	0.328312	32	262876
P02462	CO4A1_HUMAN	CO4A1	Collagen alpha-1(IV) chain	0.00144737	0.30086	22	307078
P17693	HLAG_HUMAN	HLAG	HLA class I histocompatibility antigen, alpha chain G	0.00140939	0.270239	16	169024
P05386	RLA1_HUMAN	RLA1	60S acidic ribosomal protein P1	0.00129536	0.340106	49	251952
Q92956	TNR14_HUMAN	TNR14	Tumor necrosis factor receptor superfamily member 14	0.00120849	0.332374	28	205714
P48023	TNFL6_HUMAN	TNFL6	Tumor necrosis factor ligand superfamily member 6	0.00118449	0.346673	31	271260
Q8N6P7	I22R1_HUMAN	I22R1	Interleukin-22 receptor subunit alpha-1	0.00116254	0.269944	2	170406
P20963	CD3Z_HUMAN	CD3Z	T-cell surface glycoprotein CD3 zeta chain	0.00109646	0.326026	33	201762
Q13501	SQSTM_HUMAN	SQSTM	Sequestosome-1	0.00105627	0.335301	28	210136
P42336	PK3CA_HUMAN	PK3CA	Phosphatidylinositol-4,5-bisphosphate 3-kinase catalytic subunit alpha isoform	0.00102053	0.32735	29	191166
Q9Y2G2	CARD8_HUMAN	CARD8	Caspase recruitment domain-containing protein 8	0.00100682	0.288126	11	158398
Q15653	IKBB_HUMAN	IKBB	NF-kappa-B inhibitor beta	0.00094604	0.334686	54	270160
Q01201	RELB_HUMAN	RELB	Transcription factor RelB	0.00091751	0.328716	43	241788
Q13045	FLII_HUMAN	FLII	Protein flightless-1 homolog	0.00086877	0.318445	9	109314
O14788	TNF11_HUMAN	TNF11	Tumor necrosis factor ligand superfamily member 11	0.0008392	0.327629	17	164302
Q04759	KPCT_HUMAN	KPCT	Protein kinase C theta type	0.00081112	0.335528	28	157476
Q04864	REL_HUMAN	REL	C-Rel proto-oncogene protein	0.00077355	0.339273	59	266096
Q12906	ILF3_HUMAN	ILF3	Interleukin enhancer-binding factor 3	0.00073288	0.333045	53	177264
P63208	SKP1_HUMAN	SKP1	S-phase kinase-associated protein 1	0.00071108	0.332438	43	188346
P14784	IL2RB_HUMAN	IL2RB	Interleukin-2 receptor subunit beta	0.00071019	0.336506	26	160622
P14921	ETS1_HUMAN	ETS1	Protein C-ets-1	0.00069939	0.332406	30	177688
P37173	TGFR2_HUMAN	TGFR2	TGF-beta receptor type-2	0.00069433	0.328498	27	172642
O75888	TNF13_HUMAN	TNF13	Tumor necrosis factor ligand superfamily member 13	0.00066782	0.290834	11	107848
P06729	CD2_HUMAN	CD2	T-cell surface antigen CD2	0.00065838	0.311797	14	114128
P50454	SERPH_HUMAN	SERPH	Serpin H1	0.00064049	0.312247	7	92944
Q04912	RON_HUMAN	RON	Macrophage-stimulating protein receptor	0.00063955	0.339772	18	120178
P05231	IL6_HUMAN	IL6	Interleukin-6	0.00062794	0.27387	8	80970
P19525	E2AK2_HUMAN	E2AK2	Interferon-induced, double-stranded RNA-activated protein kinase	0.00057541	0.338115	31	147522
P01375	TNFA_HUMAN	TNFA	Tumor necrosis factor	0.00056069	0.298295	19	89374
P16410	CTLA4_HUMAN	CTLA4	Cytotoxic T-lymphocyte protein 4	0.00053817	0.31093	13	131352
Q92731	ESR2_HUMAN	ESR2	Estrogen receptor beta	0.00053385	0.336866	26	129158
P41279	M3K8_HUMAN	M3K8	Mitogen-activated protein kinase kinase kinase 8	0.00053316	0.33828	39	147490
P03956	MMP1_HUMAN	MMP1	Interstitial collagenase	0.00052033	0.277666	15	90284
P45985	MP2K4_HUMAN	MP2K4	Dual specificity mitogen-activated protein kinase kinase 4	0.00047454	0.316438	27	112838
P41597	CCR2_HUMAN	CCR2	C-C chemokine receptor type 2	0.00044974	0.295271	12	122280
P14598	NCF1_HUMAN	NCF1	Neutrophil cytosol factor 1	0.00040745	0.328529	20	85850
P45452	MMP13_HUMAN	MMP13	Collagenase 3	0.00040303	0.264262	8	64902
O00221	IKBE_HUMAN	IKBE	NF-kappa-B inhibitor epsilon	0.00038527	0.329623	36	104534
P13500	CCL2_HUMAN	CCL2	C-C motif chemokine 2	0.00038075	0.26252	14	87320
P42226	STAT6_HUMAN	STAT6	Signal transducer and activator of transcription 6	0.000368	0.324529	19	89550
P13747	HLAE_HUMAN	HLAE	HLA class I histocompatibility antigen, alpha chain E	0.00036429	0.27045	14	64104
P16035	TIMP2_HUMAN	TIMP2	Metalloproteinase inhibitor 2	0.00036276	0.273913	8	54008
P20749	BCL3_HUMAN	BCL3	B-cell lymphoma 3-encoded protein	0.00030797	0.338942	22	111900
O14543	SOCS3_HUMAN	SOCS3	Suppressor of cytokine signaling 3	0.00029455	0.316786	25	65478
P17706	PTN2_HUMAN	PTN2	Tyrosine-protein phosphatase non-receptor type 2	0.00028607	0.332661	19	71640
P08254	MMP3_HUMAN	MMP3	Stromelysin-1	0.0002809	0.271127	15	58256
P01584	IL1B_HUMAN	IL1B	Interleukin-1 beta	0.00027921	0.28288	11	30074
P52333	JAK3_HUMAN	JAK3	Tyrosine-protein kinase JAK3	0.00026107	0.323228	35	71578
Q7L576	CYFP1_HUMAN	CYFP1	Cytoplasmic FMR1-interacting protein 1	0.00026087	0.325658	28	64984
P31939	PUR9_HUMAN	PUR9	Bifunctional purine biosynthesis protein PURHPhosphoribosylaminoimidazolecarboxamide formyltransferase	0.00024933	0.308219	11	50320
P51451	BLK_HUMAN	BLK	Tyrosine-protein kinase BLK	0.0002468	0.307018	12	50738
Q14116	IL18_HUMAN	IL18	Interleukin-18	0.00022985	0.27232	5	33110
P17858	K6PL_HUMAN	K6PL	6-phosphofructokinase, liver type	0.00021417	0.32116	17	56642
P35916	VGFR3_HUMAN	VGFR3	Vascular endothelial growth factor receptor 3	0.00020168	0.312218	12	40900
P21580	TNAP3_HUMAN	TNAP3	Tumor necrosis factor, alpha-induced protein 3	0.00019518	0.316063	16	59056
P08572	CO4A2_HUMAN	CO4A2	Collagen alpha-2(IV) chainCanstatin	0.00018196	0.281845	13	53154
Q9UJY4	GGA2_HUMAN	GGA2	ADP-ribosylation factor-binding protein GGA2	0.00017521	0.287815	13	25378
O75689	CENA1_HUMAN	CENA1	Centaurin-alpha-1	0.00017265	0.308439	13	34084
P17947	SPI1_HUMAN	SPI1	Transcription factor PU.1	0.00017138	0.309403	22	39214
P14174	MIF_HUMAN	MIF	Macrophage migration inhibitory factor	0.00016687	0.308137	14	59250
Q92844	TANK_HUMAN	TANK	TRAF family member-associated NF-kappa-B activator	0.00015922	0.322506	23	44932
P60568	IL2_HUMAN	IL2	Interleukin-2	0.00015579	0.281662	10	23336
P09237	MMP7_HUMAN	MMP7	Matrilysin	0.00015512	0.281891	11	34190
P06702	S10A9_HUMAN	S10A9	Protein S100-A9	0.00014995	0.311545	10	33572
P01111	RASN_HUMAN	RASN	GTPase NRas	0.00014419	0.299171	10	31298
P05109	S10A8_HUMAN	S10A8	Protein S100-A8	0.00013844	0.308989	13	26438
P07333	CSF1R_HUMAN	CSF1R	Macrophage colony-stimulating factor 1 receptor	0.0001219	0.325719	19	35270
P03973	SLPI_HUMAN	SLPI	Antileukoproteinase	0.00012172	0.281456	8	17170
O95990	F107A_HUMAN	F107A	Protein FAM107A	0.00011758	0.294718	7	21122
Q9UJ41	RABX5_HUMAN	RABX5	Rab5 GDP/GTP exchange factor	0.00011666	0.308411	9	20652
P01583	IL1A_HUMAN	IL1A	Interleukin-1 alpha	0.00011555	0.274542	8	16980
P35354	PGH2_HUMAN	PGH2	Prostaglandin G/H synthase 2	0.00011437	0.297706	6	17442
P17813	EGLN_HUMAN	EGLN	Endoglin	0.00011203	0.267299	14	26460
Q13568	IRF5_HUMAN	IRF5	Interferon regulatory factor 5	8.488e-05	0.306122	9	25038
Q99523	SORT_HUMAN	SORT	Sortilin	8.454e-05	0.27838	6	11780
Q99075	HBEGF_HUMAN	HBEGF	Proheparin-binding EGF-like growth factorHeparin-binding EGF-like growth factor	7.478e-05	0.303442	9	16402
P12318	FCG2A_HUMAN	FCG2A	Low affinity immunoglobulin gamma Fc region receptor II-a	5.889e-05	0.307508	9	15646
P01374	TNFB_HUMAN	TNFB	Lymphotoxin-alpha	5.612e-05	0.294043	10	15744
Q15025	TNIP1_HUMAN	TNIP1	TNFAIP3-interacting protein 1	5.078e-05	0.309679	12	12460
P08183	MDR1_HUMAN	MDR1	Multidrug resistance protein 1	4.854e-05	0.27361	2	5942
P01589	IL2RA_HUMAN	IL2RA	Interleukin-2 receptor alpha chain	4.843e-05	0.298655	9	11292
Q02556	IRF8_HUMAN	IRF8	Interferon regulatory factor 8	4.217e-05	0.285655	5	3908
P39060	COIA1_HUMAN	COIA1	Collagen alpha-1(XVIII) chainEndostatin	4.102e-05	0.273287	5	6248
P16455	MGMT_HUMAN	MGMT	Methylated-DNA--protein-cysteine methyltransferase	3.669e-05	0.317017	7	20014
Q9Y2R2	PTN22_HUMAN	PTN22	Tyrosine-protein phosphatase non-receptor type 22	3.521e-05	0.319237	12	10954
Q01543	FLI1_HUMAN	FLI1	Friend leukemia integration 1 transcription factor	2.038e-05	0.285703	5	4130
Q03519	TAP2_HUMAN	TAP2	Antigen peptide transporter 2	2.029e-05	0.265192	9	4172
P22894	MMP8_HUMAN	MMP8	Neutrophil collagenase	1.862e-05	0.227916	4	2860
P09603	CSF1_HUMAN	CSF1	Macrophage colony-stimulating factor 1	1.81e-05	0.271509	7	3382
Q9UQQ2	SH2B3_HUMAN	SH2B3	SH2B adapter protein 3	1.683e-05	0.32365	12	8222
P43354	NR4A2_HUMAN	NR4A2	Nuclear receptor subfamily 4 group A member 2	1.55e-05	0.275569	7	3776
P01133	EGF_HUMAN	EGF	Pro-epidermal growth factorEpidermal growth factor	1.451e-05	0.314714	10	3318
Q9ULZ9	MMP17_HUMAN	MMP17	Matrix metalloproteinase-17	1.367e-05	0.266027	3	2516
O15226	NKRF_HUMAN	NKRF	NF-kappa-B-repressing factor	1.229e-05	0.28157	5	5216
Q9ULV5	HSF4_HUMAN	HSF4	Heat shock factor protein 4	6.91e-06	0.296053	7	2572
P19256	LFA3_HUMAN	LFA3	Lymphocyte function-associated antigen 3	6.81e-06	0.238966	2	1150
P01906	HA26_HUMAN	HA26	HLA class II histocompatibility antigen, DQ(6) alpha chain	4.37e-06	0.262699	2	758
Q7Z6A9	BTLA_HUMAN	BTLA	B- and T-lymphocyte attenuator	4.17e-06	0.281113	3	880
Q7Z698	SPRE2_HUMAN	SPRE2	Sprouty-related, EVH1 domain-containing protein 2	2.19e-06	0.271807	2	586
P02735	SAA_HUMAN	SAA	Serum amyloid A proteinAmyloid protein A	5.3e-07	0.23541	4	130
Q10588	BST1_HUMAN	BST1	ADP-ribosyl cyclase 2	0	0.273114	3	0
P09238	MMP10_HUMAN	MMP10	Stromelysin-2	0	0.222201	1	0
Q9P0J0	NDUAD_HUMAN	NDUAD	NADH dehydrogenase [ubiquinone] 1 alpha subcomplex subunit 13	0	0.275044	1	0
Q9NRE1	MMP26_HUMAN	MMP26	Matrix metalloproteinase-26	0	0.222201	1	0
Q8TBX8	PI42C_HUMAN	PI42C	Phosphatidylinositol-5-phosphate 4-kinase type-2 gamma	0	0.259765	3	0
Q9NPA2	MMP25_HUMAN	MMP25	Matrix metalloproteinase-25	0	0.236374	1	0
P40933	IL15_HUMAN	IL15	Interleukin-15	0	0.254517	3	0
P26012	ITB8_HUMAN	ITB8	Integrin beta-8	0	0.260879	3	0
P01920	HB24_HUMAN	HB24	HLA class II histocompatibility antigen, DQ(3) beta chain	0	0.260291	1	0

## Sheet: Table S16
Extended Interactome, components and topological parameters
Uniprot ID	Uniprot name	Canonical Gene name	Description	Betweenness Centrality	Closeness Centrality	Degree	Stress
P62993	GRB2_HUMAN	GRB2	Growth factor receptor-bound protein 2	0.0799199	0.416466	358	13635364
P00533	EGFR_HUMAN	EGFR	Epidermal growth factor receptor	0.0383407	0.406404	220	7424684
P12931	SRC_HUMAN	SRC	Proto-oncogene tyrosine-protein kinase Src	0.0329844	0.408416	215	6299676
Q9Y4K3	TRAF6_HUMAN	TRAF6	TNF receptor-associated factor 6	0.0314007	0.381734	180	5909712
P63104	1433Z_HUMAN	1433Z	14-3-3 protein zeta/delta	0.0287235	0.393616	207	5971328
P04637	P53_HUMAN	P53	Cellular tumor antigen p53	0.025876	0.385257	178	4809294
P06241	FYN_HUMAN	FYN	Proto-oncogene tyrosine-protein kinase Fyn	0.024981	0.383934	205	4612334
P17252	KPCA_HUMAN	KPCA	Protein kinase C alpha type	0.0228827	0.384615	135	3846426
P61981	1433G_HUMAN	1433G	14-3-3 protein gamma	0.0208305	0.38144	157	3966976
P28482	MK01_HUMAN	MK01	Mitogen-activated protein kinase 1	0.0206136	0.394063	153	4041186
P17612	KAPCA_HUMAN	KAPCA	cAMP-dependent protein kinase catalytic subunit alpha	0.019375	0.369049	97	3199652
P01106	MYC_HUMAN	MYC	Myc proto-oncogene protein	0.0190231	0.367211	133	4045212
P07900	HS90A_HUMAN	HS90A	Heat shock protein HSP 90-alpha	0.0189403	0.396091	150	3791390
P27986	P85A_HUMAN	P85A	Phosphatidylinositol 3-kinase regulatory subunit alpha	0.0185011	0.387324	154	3473786
P32121	ARRB2_HUMAN	ARRB2	Beta-arrestin-2	0.017931	0.374919	154	3965742
P49407	ARRB1_HUMAN	ARRB1	Beta-arrestin-1	0.0169034	0.375895	125	3411884
P35222	CTNB1_HUMAN	CTNB1	Catenin beta-1	0.0165596	0.381482	119	3074294
P00519	ABL1_HUMAN	ABL1	Proto-oncogene tyrosine-protein kinase ABL1	0.016319	0.393795	144	3167914
P60709	ACTB_HUMAN	ACTB	Actin, cytoplasmic 1	0.0158115	0.376508	120	2833810
P62158	CALM_HUMAN	CALM	Calmodulin	0.0153084	0.365892	89	3024890
Q14164	IKKE_HUMAN	IKKE	Inhibitor of nuclear factor kappa-B kinase subunit epsilon	0.0150727	0.367016	138	3212328
P03372	ESR1_HUMAN	ESR1	Estrogen receptor	0.0149883	0.391172	126	3121916
Q92793	CBP_HUMAN	CBP	CREB-binding protein	0.0145804	0.367756	147	2894562
P40763	STAT3_HUMAN	STAT3	Signal transducer and activator of transcription 3	0.014129	0.379352	100	2787752
P04899	GNAI2_HUMAN	GNAI2	Guanine nucleotide-binding protein G(i), alpha-2 subunit	0.0140643	0.358659	91	2645850
P49023	PAXI_HUMAN	PAXI	Paxillin	0.0138649	0.383	120	3089378
P06239	LCK_HUMAN	LCK	Proto-oncogene tyrosine-protein kinase LCK	0.0135797	0.387541	142	3004300
P13569	CFTR_HUMAN	CFTR	Cystic fibrosis transmembrane conductance regulator	0.0133747	0.34716	78	2443866
P40337	VHL_HUMAN	VHL	Von Hippel-Lindau disease tumor suppressor	0.0133512	0.344639	95	2530406
P38398	BRCA1_HUMAN	BRCA1	Breast cancer type 1 susceptibility protein	0.012669	0.372501	110	2431858
P84022	SMAD3_HUMAN	SMAD3	Mothers against decapentaplegic homolog 3	0.0123077	0.380143	117	2495914
Q12933	TRAF2_HUMAN	TRAF2	TNF receptor-associated factor 2	0.012129	0.353175	108	2441746
Q04206	TF65_HUMAN	TF65	Transcription factor p65	0.0119151	0.376303	151	2787726
Q09472	EP300_HUMAN	EP300	Histone acetyltransferase p300	0.011618	0.371263	141	2404482
P02751	FINC_HUMAN	FINC	Fibronectin	0.0115923	0.343886	66	1585988
P68400	CSK21_HUMAN	CSK21	Casein kinase II subunit alpha	0.0114329	0.369876	104	2025372
P05067	A4_HUMAN	A4	Amyloid beta A4 protein	0.0110095	0.363208	71	1961872
P10275	ANDR_HUMAN	ANDR	Androgen receptor	0.0110058	0.384573	109	2346392
P08473	NEP_HUMAN	NEP	Neprilysin	0.0109095	0.353608	77	2465828
Q03135	CAV1_HUMAN	CAV1	Caveolin-1	0.010725	0.375691	78	1912012
Q15796	SMAD2_HUMAN	SMAD2	Mothers against decapentaplegic homolog 2	0.0106786	0.364162	97	2025582
Q07954	LRP1_HUMAN	LRP1	Prolow-density lipoprotein receptor-related protein 1	0.0104344	0.343511	43	1519612
Q13485	SMAD4_HUMAN	SMAD4	Mothers against decapentaplegic homolog 4	0.0102317	0.362107	94	1799386
P08238	HS90B_HUMAN	HS90B	Heat shock protein HSP 90-beta	0.0101154	0.390423	156	2431864
P42574	CASP3_HUMAN	CASP3	Caspase-3	0.0100597	0.365121	101	1837728
P31749	AKT1_HUMAN	AKT1	RAC-alpha serine/threonine-protein kinase	0.00996278	0.37226	106	1899090
P68104	EF1A1_HUMAN	EF1A1	Elongation factor 1-alpha 1	0.00985457	0.371144	134	1917558
P11142	HSP7C_HUMAN	HSP7C	Heat shock cognate 71 kDa protein	0.00968029	0.394602	127	2450342
P43405	KSYK_HUMAN	KSYK	Tyrosine-protein kinase SYK	0.00952654	0.365661	81	1850708
P04049	RAF1_HUMAN	RAF1	RAF proto-oncogene serine/threonine-protein kinase	0.00952147	0.376221	90	2035100
Q99759	M3K3_HUMAN	M3K3	Mitogen-activated protein kinase kinase kinase 3	0.00949586	0.369246	103	1960138
P02768	ALBU_HUMAN	ALBU	Serum albumin	0.00924835	0.33231	60	1193850
Q13547	HDAC1_HUMAN	HDAC1	Histone deacetylase 1	0.00910191	0.363169	108	1873696
P05556	ITB1_HUMAN	ITB1	Integrin beta-1	0.00882427	0.340273	70	1469068
P23458	JAK1_HUMAN	JAK1	Tyrosine-protein kinase JAK1	0.00871581	0.359291	75	1744726
P06493	CDC2_HUMAN	CDC2	Cell division control protein 2 homolog	0.00864986	0.363398	91	1566248
P21333	FLNA_HUMAN	FLNA	Filamin-A	0.0086151	0.37663	67	1608364
Q05655	KPCD_HUMAN	KPCD	Protein kinase C delta type	0.0084013	0.375366	87	1657880
P42224	STAT1_HUMAN	STAT1	Signal transducer and activator of transcription 1-alpha/beta	0.00829665	0.368892	71	1722894
P27361	MK03_HUMAN	MK03	Mitogen-activated protein kinase 3	0.00802031	0.376303	103	1699128
P30480	1B42_HUMAN	1B42	HLA class I histocompatibility antigen, B-42 alpha chain	0.00789449	0.343955	97	1720764
O43914	TYOBP_HUMAN	TYOBP	TYRO protein tyrosine kinase-binding protein	0.00785408	0.272491	12	1488816
P16333	NCK1_HUMAN	NCK1	Cytoplasmic protein NCK1	0.00773291	0.358919	119	1380584
Q06124	PTN11_HUMAN	PTN11	Tyrosine-protein phosphatase non-receptor type 11	0.00756154	0.368892	107	1588628
P36897	TGFR1_HUMAN	TGFR1	TGF-beta receptor type-1	0.00755827	0.34481	71	1395600
Q9Y6K9	NEMO_HUMAN	NEMO	NF-kappa-B essential modulator	0.00753149	0.366086	118	1789110
P29350	PTN6_HUMAN	PTN6	Tyrosine-protein phosphatase non-receptor type 6	0.00745919	0.367094	86	1404256
P12830	CADH1_HUMAN	CADH1	Epithelial cadherin	0.00730606	0.363169	64	1291818
P15311	EZRI_HUMAN	EZRI	Ezrin	0.00727983	0.366202	64	1404472
P08670	VIME_HUMAN	VIME	Vimentin	0.00725626	0.375406	101	1479018
P29353	SHC1_HUMAN	SHC1	SHC-transforming protein 1	0.00723526	0.374473	116	1586946
P32245	MC4R_HUMAN	MC4R	Melanocortin receptor 4	0.00715091	0.276956	6	1193812
P50148	GNAQ_HUMAN	GNAQ	Guanine nucleotide-binding protein G(q) subunit alpha	0.00707965	0.31566	49	1178874
O60674	JAK2_HUMAN	JAK2	Tyrosine-protein kinase JAK2	0.00706849	0.363894	88	1423162
P56704	WNT3A_HUMAN	WNT3A	Protein Wnt-3a	0.00706259	0.268002	9	995968
P63000	RAC1_HUMAN	RAC1	Ras-related C3 botulinum toxin substrate 1	0.00690917	0.356225	80	1203002
P31946	1433B_HUMAN	1433B	14-3-3 protein beta/alpha	0.00683261	0.367913	93	1423724
P19174	PLCG1_HUMAN	PLCG1	1-phosphatidylinositol-4,5-bisphosphate phosphodiesterase gamma-1	0.00682642	0.365931	114	1410004
Q12959	DLG1_HUMAN	DLG1	Disks large homolog 1	0.00682361	0.329906	37	1023834
P63244	GBLP_HUMAN	GBLP	Guanine nucleotide-binding protein subunit beta-2-like 1	0.00678689	0.377451	93	1595894
P11021	GRP78_HUMAN	GRP78	78 kDa glucose-regulated protein	0.00677833	0.375162	72	1446860
P06400	RB_HUMAN	RB	Retinoblastoma-associated protein	0.0065616	0.362865	102	1410266
P07948	LYN_HUMAN	LYN	Tyrosine-protein kinase Lyn	0.00650652	0.36624	96	1287522
P18206	VINC_HUMAN	VINC	Vinculin	0.00649133	0.358214	69	1294428
Q05397	FAK1_HUMAN	FAK1	Focal adhesion kinase 1	0.00647326	0.372942	87	1375072
P08047	SP1_HUMAN	SP1	Transcription factor Sp1	0.00635966	0.373504	79	1478924
Q06187	BTK_HUMAN	BTK	Tyrosine-protein kinase BTK	0.00625959	0.350886	59	1079800
P63096	GNAI1_HUMAN	GNAI1	Guanine nucleotide-binding protein G(i), alpha-1 subunit	0.00624983	0.316786	55	1126838
P19438	TNR1A_HUMAN	TNR1A	Tumor necrosis factor receptor superfamily member 1A	0.00623337	0.366667	83	1372778
P04626	ERBB2_HUMAN	ERBB2	Receptor tyrosine-protein kinase erbB-2	0.00623252	0.36336	92	1352200
Q9Y230	RUVB2_HUMAN	RUVB2	RuvB-like 2	0.00603152	0.367522	86	1318034
P24941	CDK2_HUMAN	CDK2	Cell division protein kinase 2	0.00592917	0.349048	77	1030702
P22681	CBL_HUMAN	CBL	E3 ubiquitin-protein ligase CBL	0.00579449	0.371821	94	1199114
P07437	TBB5_HUMAN	TBB5	Tubulin beta chain	0.00576551	0.385815	106	1622414
P10809	CH60_HUMAN	CH60	60 kDa heat shock protein, mitochondrial	0.00574496	0.380393	100	1342106
Q16539	MK14_HUMAN	MK14	Mitogen-activated protein kinase 14	0.00570137	0.361013	77	975386
P01730	CD4_HUMAN	CD4	T-cell surface glycoprotein CD4	0.00560824	0.351848	70	1189158
P51681	CCR5_HUMAN	CCR5	C-C chemokine receptor type 5	0.00551296	0.329561	38	1286344
P46108	CRK_HUMAN	CRK	Proto-oncogene C-crk	0.00535271	0.3669	102	1087746
P06748	NPM_HUMAN	NPM	Nucleophosmin	0.00534231	0.381566	118	1507422
P12004	PCNA_HUMAN	PCNA	Proliferating cell nuclear antigen	0.00534046	0.346431	77	992884
P27797	CALR_HUMAN	CALR	Calreticulin	0.00533279	0.33231	40	858742
Q15797	SMAD1_HUMAN	SMAD1	Mothers against decapentaplegic homolog 1	0.00532255	0.344194	63	891692
P68133	ACTS_HUMAN	ACTS	Actin, alpha skeletal muscle	0.00516172	0.358881	60	875576
P49841	GSK3B_HUMAN	GSK3B	Glycogen synthase kinase-3 beta	0.00513083	0.356812	66	1021208
P67775	PP2AA_HUMAN	PP2AA	Serine/threonine-protein phosphatase 2A catalytic subunit alpha isoform	0.00512575	0.343137	52	902350
Q14790	CASP8_HUMAN	CASP8	Caspase-8	0.00502697	0.360262	74	1055026
P61769	B2MG_HUMAN	B2MG	Beta-2-microglobulinBeta-2-microglobulin form pI 5.3	0.00491607	0.288318	31	812548
Q14192	FHL2_HUMAN	FHL2	Four and a half LIM domains protein 2	0.00487951	0.353824	46	802716
P19338	NUCL_HUMAN	NUCL	Nucleolin	0.00487416	0.376017	113	1265694
P25098	ARBK1_HUMAN	ARBK1	Beta-adrenergic receptor kinase 1	0.00485527	0.341144	34	874528
P05412	JUN_HUMAN	JUN	Transcription factor AP-1	0.00474966	0.354693	85	1127608
O15198	SMAD9_HUMAN	SMAD9	Mothers against decapentaplegic homolog 9	0.00471697	0.323681	40	716988
P68366	TBA4A_HUMAN	TBA4A	Tubulin alpha-4A chain	0.00448465	0.363703	43	818106
P43403	ZAP70_HUMAN	ZAP70	Tyrosine-protein kinase ZAP-70	0.00444724	0.343103	54	953862
P49768	PSN1_HUMAN	PSN1	Presenilin-1	0.0044274	0.335626	47	735656
P27348	1433T_HUMAN	1433T	14-3-3 protein theta	0.00442132	0.355786	74	884782
Q05513	KPCZ_HUMAN	KPCZ	Protein kinase C zeta type	0.0044074	0.370668	66	965708
P60953	CDC42_HUMAN	CDC42	Cell division control protein 42 homolog	0.00440081	0.357585	71	814344
O75365	TP4A3_HUMAN	TP4A3	Protein tyrosine phosphatase type IVA 3	0.0043796	0.312218	35	730610
P19838	NFKB1_HUMAN	NFKB1	Nuclear factor NF-kappa-B p105 subunit	0.0043749	0.361616	103	1196942
P63165	SUMO1_HUMAN	SUMO1	Small ubiquitin-related modifier 1	0.00433826	0.330346	50	880530
P11362	FGFR1_HUMAN	FGFR1	Basic fibroblast growth factor receptor 1	0.00433031	0.339839	40	707644
P01112	RASH_HUMAN	RASH	GTPase HRas	0.00431865	0.347055	56	779666
Q92769	HDAC2_HUMAN	HDAC2	Histone deacetylase 2	0.00427344	0.352421	68	884028
O15111	IKKA_HUMAN	IKKA	Inhibitor of nuclear factor kappa-B kinase subunit alpha	0.00424545	0.372621	89	1095664
P61586	RHOA_HUMAN	RHOA	Transforming protein RhoA	0.00422122	0.343341	58	723944
P08754	GNAI3_HUMAN	GNAI3	Guanine nucleotide-binding protein G(k) subunit alpha	0.00421675	0.319178	43	640890
Q13153	PAK1_HUMAN	PAK1	Serine/threonine-protein kinase PAK 1	0.00419618	0.368578	59	897968
P27701	CD82_HUMAN	CD82	CD82 antigen	0.00418422	0.313603	25	937324
P63261	ACTG_HUMAN	ACTG	Actin, cytoplasmic 2	0.0041783	0.360187	64	859706
P46092	CCR10_HUMAN	CCR10	C-C chemokine receptor type 10	0.00417184	0.308989	14	626710
P10415	BCL2_HUMAN	BCL2	Apoptosis regulator Bcl-2	0.00413678	0.347125	59	756966
P35568	IRS1_HUMAN	IRS1	Insulin receptor substrate 1	0.00413358	0.368617	64	883984
O43318	M3K7_HUMAN	M3K7	Mitogen-activated protein kinase kinase kinase 7	0.00411824	0.355676	66	820182
Q05516	ZBT16_HUMAN	ZBT16	Zinc finger and BTB domain-containing protein 16	0.00410521	0.338875	47	652954
P15498	VAV_HUMAN	VAV	Proto-oncogene vav	0.00409878	0.361578	66	833304
P04150	GCR_HUMAN	GCR	Glucocorticoid receptor	0.00408158	0.358696	68	876108
Q92993	TIP60_HUMAN	TIP60	Histone acetyltransferase HTATIP	0.00404707	0.346639	45	670046
P01303	NPY_HUMAN	NPY	Neuropeptide YNeuropeptide Y	0.00398244	0.220968	8	592418
P01903	2DRA_HUMAN	2DRA	HLA class II histocompatibility antigen, DR alpha chain	0.00394052	0.252791	16	936634
P30101	PDIA3_HUMAN	PDIA3	Protein disulfide-isomerase A3	0.00393805	0.312444	36	665180
Q9Y478	AAKB1_HUMAN	AAKB1	5'-AMP-activated protein kinase subunit beta-1	0.00390777	0.321012	55	848500
P41182	BCL6_HUMAN	BCL6	B-cell lymphoma 6 protein	0.00382237	0.315861	41	649426
Q00610	CLH1_HUMAN	CLH1	Clathrin heavy chain 1	0.00379438	0.348241	55	844174
P10721	KIT_HUMAN	KIT	Mast/stem cell growth factor receptor	0.00378077	0.349647	59	770926
P07355	ANXA2_HUMAN	ANXA2	Annexin A2	0.0037683	0.374514	69	996574
P26718	NKG2D_HUMAN	NKG2D	NKG2-D type II integral membrane protein	0.00375564	0.216279	11	706826
P16070	CD44_HUMAN	CD44	CD44 antigen	0.0037531	0.340976	40	661018
P45983	MK08_HUMAN	MK08	Mitogen-activated protein kinase 8	0.00368258	0.357696	71	805570
P55196	AFAD_HUMAN	AFAD	Afadin	0.00363926	0.330315	33	668082
P63279	UBC9_HUMAN	UBC9	SUMO-conjugating enzyme UBC9	0.00362764	0.34709	60	669958
P62136	PP1A_HUMAN	PP1A	Serine/threonine-protein phosphatase PP1-alpha catalytic subunit	0.0035956	0.345912	45	622380
P42858	HD_HUMAN	HD	Huntingtin	0.00352568	0.348697	39	568766
Q9Y490	TLN1_HUMAN	TLN1	Talin-1	0.00352253	0.352098	51	692606
O14920	IKKB_HUMAN	IKKB	Inhibitor of nuclear factor kappa-B kinase subunit beta	0.00350781	0.367055	80	925298
P30457	1A66_HUMAN	1A66	HLA class I histocompatibility antigen, A-66 alpha chain	0.00346395	0.232816	6	397632
P62760	VISL1_HUMAN	VISL1	Visinin-like protein 1	0.0034582	0.273805	3	575232
P04406	G3P_HUMAN	G3P	Glyceraldehyde-3-phosphate dehydrogenase	0.00344245	0.36655	81	781570
P20333	TNR1B_HUMAN	TNR1B	Tumor necrosis factor receptor superfamily member 1B	0.00342317	0.341278	56	768676
Q07021	C1QBP_HUMAN	C1QBP	Complement component 1 Q subcomponent-binding protein, mitochondrial	0.00338979	0.351777	55	700736
P99999	CYC_HUMAN	CYC	Cytochrome c	0.00337711	0.318591	21	518154
P27824	CALX_HUMAN	CALX	Calnexin	0.00337509	0.318885	33	466142
P54259	ATN1_HUMAN	ATN1	Atrophin-1	0.00334431	0.317802	40	510006
P40189	IL6RB_HUMAN	IL6RB	Interleukin-6 receptor subunit beta	0.00332977	0.333237	32	536924
P17676	CEBPB_HUMAN	CEBPB	CCAAT/enhancer-binding protein beta	0.00331464	0.346085	51	719070
Q9UM73	ALK_HUMAN	ALK	ALK tyrosine kinase receptor	0.00329377	0.340106	43	517634
P51532	SMCA4_HUMAN	SMCA4	Probable global transcription activator SNF2L4	0.00324178	0.348907	56	629712
O14745	NHERF_HUMAN	NHERF	Ezrin-radixin-moesin-binding phosphoprotein 50	0.00321759	0.32128	35	593998
P05771	KPCB_HUMAN	KPCB	Protein kinase C beta type	0.00320311	0.343375	55	624004
P25963	IKBA_HUMAN	IKBA	NF-kappa-B inhibitor alpha	0.00318889	0.363436	71	764798
P12814	ACTN1_HUMAN	ACTN1	Alpha-actinin-1	0.0031857	0.343989	36	473314
P67809	YBOX1_HUMAN	YBOX1	Nuclease-sensitive element-binding protein 1	0.00312573	0.365854	94	816396
P25445	TNR6_HUMAN	TNR6	Tumor necrosis factor receptor superfamily member 6	0.0031082	0.352815	44	547294
P08253	MMP2_HUMAN	MMP2	72 kDa type IV collagenase	0.00310566	0.309513	27	438724
P02647	APOA1_HUMAN	APOA1	Apolipoprotein A-IApolipoprotein A-I(1-242)	0.00309925	0.296027	26	414412
P63167	DYL1_HUMAN	DYL1	Dynein light chain 1, cytoplasmic	0.00309209	0.341649	38	473366
P01876	IGHA1_HUMAN	IGHA1	Ig alpha-1 chain C region	0.00308142	0.308879	20	389318
P35968	VGFR2_HUMAN	VGFR2	Vascular endothelial growth factor receptor 2	0.0030626	0.348171	43	598970
Q13177	PAK2_HUMAN	PAK2	Serine/threonine-protein kinase PAK 2	0.00305825	0.351206	50	632232
Q9UBU3	GHRL_HUMAN	GHRL	Appetite-regulating hormone	0.00301823	0.231773	7	340168
O00560	SDCB1_HUMAN	SDCB1	Syntenin-1	0.00300115	0.314685	33	433998
Q02156	KPCE_HUMAN	KPCE	Protein kinase C epsilon type	0.00296165	0.343069	41	494020
P60228	EIF3E_HUMAN	EIF3E	Eukaryotic translation initiation factor 3 subunit E	0.00294578	0.350389	56	561344
Q13432	U119A_HUMAN	U119A	Protein unc-119 homolog A	0.00294382	0.324895	33	442012
Q08334	I10R2_HUMAN	I10R2	Interleukin-10 receptor beta chain	0.00291312	0.214034	8	603118
P22607	FGFR3_HUMAN	FGFR3	Fibroblast growth factor receptor 3	0.00288878	0.315775	27	521078
Q9H237	PORCN_HUMAN	PORCN	Probable protein-cysteine N-palmitoyltransferase porcupine	0.00288417	0.211551	6	397388
Q9H7Z7	PGES2_HUMAN	PGES2	Prostaglandin E synthase 2	0.00288267	0.276713	3	630084
P42704	LPPRC_HUMAN	LPPRC	Leucine-rich PPR motif-containing protein, mitochondrial	0.00288236	0.35944	74	705878
P14780	MMP9_HUMAN	MMP9	Matrix metalloproteinase-9	0.00288101	0.285655	30	514972
Q93084	AT2A3_HUMAN	AT2A3	Sarcoplasmic/endoplasmic reticulum calcium ATPase 3	0.00287542	0.29081	4	344968
P32246	CCR1_HUMAN	CCR1	C-C chemokine receptor type 1	0.0028745	0.294418	20	562000
P01732	CD8A_HUMAN	CD8A	T-cell surface glycoprotein CD8 alpha chain	0.00287206	0.304857	25	494022
Q14289	FAK2_HUMAN	FAK2	Protein tyrosine kinase 2 beta	0.00287167	0.356481	58	620126
Q14974	IMB1_HUMAN	IMB1	Importin subunit beta-1	0.00286351	0.370509	71	754414
P05106	ITB3_HUMAN	ITB3	Integrin beta-3	0.00283893	0.338776	52	558666
Q13651	I10R1_HUMAN	I10R1	Interleukin-10 receptor alpha chain	0.00283651	0.265294	3	587734
P62330	ARF6_HUMAN	ARF6	ADP-ribosylation factor 6	0.0028211	0.324044	45	504718
P07384	CAN1_HUMAN	CAN1	Calpain-1 catalytic subunit	0.00281585	0.332119	32	420870
Q14344	GNA13_HUMAN	GNA13	Guanine nucleotide-binding protein subunit alpha-13	0.00280511	0.325199	34	539472
Q9Y6Q9	NCOA3_HUMAN	NCOA3	Nuclear receptor coactivator 3	0.00279806	0.337161	48	609216
P37840	SYUA_HUMAN	SYUA	Alpha-synuclein	0.00277643	0.341851	37	501646
P07996	TSP1_HUMAN	TSP1	Thrombospondin-1	0.00277071	0.301488	38	451864
P20226	TBP_HUMAN	TBP	TATA-box-binding protein	0.00274936	0.328063	50	602296
P13501	CCL5_HUMAN	CCL5	C-C motif chemokine 5	0.00273399	0.304669	18	420912
P01024	CO3_HUMAN	CO3	Complement C3	0.00268518	0.303282	20	318430
P13611	CSPG2_HUMAN	CSPG2	Versican core protein	0.00264361	0.276934	17	387904
P14625	ENPL_HUMAN	ENPL	Endoplasmin	0.00264128	0.314172	20	513374
Q13813	SPTA2_HUMAN	SPTA2	Spectrin alpha chain, brain	0.00262945	0.351777	31	460580
O43353	RIPK2_HUMAN	RIPK2	Receptor-interacting serine/threonine-protein kinase 2	0.00260997	0.341346	47	533696
Q05586	NMDZ1_HUMAN	NMDZ1	Glutamate [NMDA] receptor subunit zeta-1	0.0025825	0.328156	42	445044
Q15788	NCOA1_HUMAN	NCOA1	Nuclear receptor coactivator 1	0.00254866	0.334621	57	548108
Q03113	GNA12_HUMAN	GNA12	Guanine nucleotide-binding protein subunit alpha-12	0.00254514	0.32828	33	508126
P41159	LEP_HUMAN	LEP	Leptin	0.0025384	0.286364	7	281076
P08069	IGF1R_HUMAN	IGF1R	Insulin-like growth factor 1 receptor	0.00253447	0.355421	45	551290
Q15303	ERBB4_HUMAN	ERBB4	Receptor tyrosine-protein kinase erbB-4	0.00249298	0.33644	38	444864
P24928	RPB1_HUMAN	RPB1	DNA-directed RNA polymerase II subunit RPB1	0.0024889	0.330756	35	444650
O14980	XPO1_HUMAN	XPO1	Exportin-1	0.00246842	0.342256	38	431280
P59768	GBG2_HUMAN	GBG2	Guanine nucleotide-binding protein G(I)/G(S)/G(O) subunit gamma-2	0.00246549	0.303415	27	533704
P17844	DDX5_HUMAN	DDX5	Probable ATP-dependent RNA helicase DDX5	0.00244296	0.377945	68	798438
P50750	CDK9_HUMAN	CDK9	Cell division protein kinase 9	0.00243219	0.328405	27	378518
P19793	RXRA_HUMAN	RXRA	Retinoic acid receptor RXR-alpha	0.00239876	0.341379	53	491524
Q04771	ACVR1_HUMAN	ACVR1	Activin receptor type-1	0.00238931	0.314457	32	432028
P30153	2AAA_HUMAN	2AAA	Serine/threonine-protein phosphatase 2A 65 kDa regulatory subunit A alpha isoform	0.00238921	0.350035	45	498152
P05783	K1C18_HUMAN	K1C18	Keratin, type I cytoskeletal 18	0.00238278	0.354984	36	458188
P25025	CXCR2_HUMAN	CXCR2	High affinity interleukin-8 receptor B	0.0023729	0.307426	24	349612
P11831	SRF_HUMAN	SRF	Serum response factor	0.00235372	0.333301	39	429408
Q92796	DLG3_HUMAN	DLG3	Disks large homolog 3	0.00233126	0.302673	22	383048
O14924	RGS12_HUMAN	RGS12	Regulator of G-protein signaling 12	0.00232265	0.310762	17	334126
P08195	4F2_HUMAN	4F2	4F2 cell-surface antigen heavy chain	0.00231801	0.311825	12	352714
P51677	CCR3_HUMAN	CCR3	C-C chemokine receptor type 3	0.00231517	0.267609	21	459344
P43088	PF2R_HUMAN	PF2R	Prostaglandin F2-alpha receptor	0.00230697	0.216861	3	525084
P09619	PGFRB_HUMAN	PGFRB	Beta-type platelet-derived growth factor receptor	0.0023052	0.352995	58	551218
Q13077	TRAF1_HUMAN	TRAF1	TNF receptor-associated factor 1	0.00229442	0.337062	50	626166
P00747	PLMN_HUMAN	PLMN	PlasminogenPlasmin heavy chain AActivation peptideAngiostatinPlasmin heavy chain A, short formPlasmin light chain B	0.00227675	0.306393	33	385032
Q9UPY3	DICER_HUMAN	DICER	Endoribonuclease Dicer	0.00226171	0.318914	67	549222
Q16695	H31T_HUMAN	H31T	Histone H3.1t	0.00226144	0.321429	35	379378
P15923	TFE2_HUMAN	TFE2	Transcription factor E2-alpha	0.00225152	0.330756	37	428262
P20936	RASA1_HUMAN	RASA1	Ras GTPase-activating protein 1	0.00223274	0.355494	62	505840
Q99558	M3K14_HUMAN	M3K14	Mitogen-activated protein kinase kinase kinase 14	0.00222447	0.354041	74	657030
P62805	H4_HUMAN	H4	Histone H4	0.0022226	0.343239	32	388866
Q05209	PTN12_HUMAN	PTN12	Tyrosine-protein phosphatase non-receptor type 12	0.00221603	0.335984	25	352806
P08631	HCK_HUMAN	HCK	Tyrosine-protein kinase HCK	0.00221378	0.338082	47	445936
O75400	PR40A_HUMAN	PR40A	Pre-mRNA-processing factor 40 homolog A	0.00219631	0.324317	29	320790
P09429	HMGB1_HUMAN	HMGB1	High mobility group protein B1	0.00217868	0.331516	31	371712
P13987	CD59_HUMAN	CD59	CD59 glycoprotein	0.00217776	0.332247	12	334378
O00264	PGRC1_HUMAN	PGRC1	Membrane-associated progesterone receptor component 1	0.00216966	0.299197	11	458668
O43707	ACTN4_HUMAN	ACTN4	Alpha-actinin-4	0.00216124	0.341817	29	372906
Q13233	M3K1_HUMAN	M3K1	Mitogen-activated protein kinase kinase kinase 1	0.0021435	0.360562	67	576630
P26038	MOES_HUMAN	MOES	Moesin	0.00214289	0.335463	42	413476
P21802	FGFR2_HUMAN	FGFR2	Fibroblast growth factor receptor 2	0.00213774	0.303044	24	364934
P43699	NKX21_HUMAN	NKX21	Homeobox protein Nkx-2.1	0.00213541	0.339906	17	375328
P06213	INSR_HUMAN	INSR	Insulin receptorInsulin receptor subunit alphaInsulin receptor subunit beta	0.00213334	0.361616	65	539234
P38646	GRP75_HUMAN	GRP75	Stress-70 protein, mitochondrial	0.00211194	0.356702	56	643124
P35080	PROF2_HUMAN	PROF2	Profilin-2	0.00209438	0.325566	25	301478
O14964	HGS_HUMAN	HGS	Hepatocyte growth factor-regulated tyrosine kinase substrate	0.0020934	0.329091	25	347076
P10636	TAU_HUMAN	TAU	Microtubule-associated protein tau	0.00209116	0.351848	42	446404
O15162	PLS1_HUMAN	PLS1	Phospholipid scramblase 1	0.00208902	0.335431	27	316724
Q13616	CUL1_HUMAN	CUL1	Cullin-1	0.00208495	0.344742	72	491644
P34998	CRFR1_HUMAN	CRFR1	Corticotropin-releasing factor receptor 1	0.00208108	0.279345	8	503294
P62081	RS7_HUMAN	RS7	40S ribosomal protein S7	0.00207326	0.36075	107	636486
P29590	PML_HUMAN	PML	Probable transcription factor PML	0.00206823	0.343001	46	403492
P01871	IGHM_HUMAN	IGHM	Ig mu chain C region	0.00206234	0.304482	16	292500
P01857	IGHG1_HUMAN	IGHG1	Ig gamma-1 chain C region	0.00206057	0.309458	27	292346
Q99962	SH3G2_HUMAN	SH3G2	Endophilin-A1	0.00205684	0.313859	26	322580
P56537	IF6_HUMAN	IF6	Eukaryotic translation initiation factor 6	0.00205597	0.323953	40	407756
P51116	FXR2_HUMAN	FXR2	Fragile X mental retardation syndrome-related protein 2	0.00205143	0.317511	59	401308
Q9Y572	RIPK3_HUMAN	RIPK3	Receptor-interacting serine/threonine-protein kinase 3	0.00204397	0.338875	54	579168
P19784	CSK22_HUMAN	CSK22	Casein kinase II subunit alpha'	0.00203654	0.351313	47	495704
Q13873	BMPR2_HUMAN	BMPR2	Bone morphogenetic protein receptor type-2	0.0020319	0.3068	27	316668
P42768	WASP_HUMAN	WASP	Wiskott-Aldrich syndrome protein	0.00201858	0.345739	41	386606
P51617	IRAK1_HUMAN	IRAK1	Interleukin-1 receptor-associated kinase 1	0.00199617	0.33795	37	361786
P62873	GBB1_HUMAN	GBB1	Guanine nucleotide-binding protein G(I)/G(S)/G(T) subunit beta-1	0.00198809	0.307617	31	469682
P36542	ATPG_HUMAN	ATPG	ATP synthase subunit gamma, mitochondrial	0.00198798	0.320833	36	399878
P11274	BCR_HUMAN	BCR	Breakpoint cluster region protein	0.0019837	0.360187	43	495770
P17181	INAR1_HUMAN	INAR1	Interferon-alpha/beta receptor alpha chain	0.00197666	0.331642	21	355846
P08575	CD45_HUMAN	CD45	Leukocyte common antigen	0.00196964	0.338412	38	333040
P21860	ERBB3_HUMAN	ERBB3	Receptor tyrosine-protein kinase erbB-3	0.00196824	0.344262	55	438966
Q71U36	TBA1A_HUMAN	TBA1A	Tubulin alpha-1A chain	0.00195899	0.364507	66	521610
O75925	PIAS1_HUMAN	PIAS1	E3 SUMO-protein ligase PIAS1	0.0019532	0.348592	61	437658
P06396	GELS_HUMAN	GELS	Gelsolin	0.00194361	0.353463	32	385076
P20366	TKN1_HUMAN	TKN1	Protachykinin-1	0.001939	0.256515	6	235518
Q8TBB1	LNX1_HUMAN	LNX1	E3 ubiquitin-protein ligase LNX	0.00193335	0.305313	15	256106
P62826	RAN_HUMAN	RAN	GTP-binding nuclear protein Ran	0.00193165	0.354512	64	430410
P07711	CATL1_HUMAN	CATL1	Cathepsin L1	0.00193073	0.304428	20	234592
P46531	NOTC1_HUMAN	NOTC1	Neurogenic locus notch homolog protein 1	0.00192819	0.327319	30	350238
P08581	MET_HUMAN	MET	Hepatocyte growth factor receptor	0.00192618	0.349365	32	317312
P29466	CASP1_HUMAN	CASP1	Caspase-1	0.00190994	0.327041	32	313406
Q99959	PKP2_HUMAN	PKP2	Plakophilin-2	0.00190976	0.315229	12	260460
Q14315	FLNC_HUMAN	FLNC	Filamin-C	0.00190892	0.322686	17	355774
P62879	GBB2_HUMAN	GBB2	Guanine nucleotide-binding protein G(I)/G(S)/G(T) subunit beta-2	0.00188857	0.312472	23	440836
P01023	A2MG_HUMAN	A2MG	Alpha-2-macroglobulin	0.00188306	0.300599	16	238184
P56945	BCAR1_HUMAN	BCAR1	Breast cancer anti-estrogen resistance protein 1	0.00186685	0.360487	51	455852
P11802	CDK4_HUMAN	CDK4	Cell division protein kinase 4	0.00186094	0.337752	43	353222
P57678	GEMI4_HUMAN	GEMI4	Component of gems 4	0.001845	0.326271	74	398364
P34925	RYK_HUMAN	RYK	Tyrosine-protein kinase RYK	0.00184381	0.274021	6	300446
P24385	CCND1_HUMAN	CCND1	G1/S-specific cyclin-D1	0.0018398	0.346639	42	417108
P01137	TGFB1_HUMAN	TGFB1	Transforming growth factor beta-1Latency-associated peptide	0.00183547	0.314885	27	344000
Q00987	MDM2_HUMAN	MDM2	E3 ubiquitin-protein ligase Mdm2	0.00183027	0.353896	50	455784
P30504	1C04_HUMAN	1C04	HLA class I histocompatibility antigen, Cw-4 alpha chain	0.00182939	0.298244	12	341090
Q15645	TRP13_HUMAN	TRP13	Thyroid receptor-interacting protein 13	0.00182404	0.279932	14	344502
P08107	HSP71_HUMAN	HSP71	Heat shock 70 kDa protein 1	0.00182305	0.352457	41	393856
Q00535	CDK5_HUMAN	CDK5	Cell division protein kinase 5	0.0018015	0.34512	39	353640
O00238	BMR1B_HUMAN	BMR1B	Bone morphogenetic protein receptor type-1B	0.00178119	0.306339	34	322398
P15172	MYOD1_HUMAN	MYOD1	Myoblast determination protein 1	0.00176707	0.338412	34	362566
P24046	GBRR1_HUMAN	GBRR1	Gamma-aminobutyric acid receptor subunit rho-1	0.00176471	0.312528	9	197932
P30874	SSR2_HUMAN	SSR2	Somatostatin receptor type 2	0.00176391	0.291593	6	257718
Q13469	NFAC2_HUMAN	NFAC2	Nuclear factor of activated T-cells, cytoplasmic 2	0.00176086	0.32122	21	270268
Q13526	PIN1_HUMAN	PIN1	Peptidyl-prolyl cis-trans isomerase NIMA-interacting 1	0.00175791	0.344057	35	385304
Q9Y3R0	GRIP1_HUMAN	GRIP1	Glutamate receptor-interacting protein 1	0.00175673	0.302938	21	325840
P25942	TNR5_HUMAN	TNR5	Tumor necrosis factor receptor superfamily member 5	0.00175649	0.330946	25	281168
P16473	TSHR_HUMAN	TSHR	Thyrotropin receptor	0.00175161	0.326763	22	305316
P42229	STA5A_HUMAN	STA5A	Signal transducer and activator of transcription 5A	0.00174974	0.352923	51	515752
P08651	NFIC_HUMAN	NFIC	Nuclear factor 1 C-type	0.00174651	0.269986	4	298052
P09038	FGF2_HUMAN	FGF2	Heparin-binding growth factor 2	0.00174173	0.304508	21	277054
P10747	CD28_HUMAN	CD28	T-cell-specific surface glycoprotein CD28	0.00173568	0.317192	15	324188
O43603	GALR2_HUMAN	GALR2	Galanin receptor type 2	0.0017306	0.240042	2	258426
P21554	CNR1_HUMAN	CNR1	Cannabinoid receptor 1	0.00173035	0.284063	6	240194
P43681	ACHA4_HUMAN	ACHA4	Neuronal acetylcholine receptor subunit alpha-4	0.00172985	0.21507	3	287628
Q13418	ILK_HUMAN	ILK	Integrin-linked protein kinase	0.00172492	0.326579	29	279698
P18031	PTN1_HUMAN	PTN1	Tyrosine-protein phosphatase non-receptor type 1	0.00171635	0.363246	48	435458
Q9UP38	FZD1_HUMAN	FZD1	Frizzled-1	0.00171332	0.211487	4	229944
P38936	CDN1A_HUMAN	CDN1A	Cyclin-dependent kinase inhibitor 1	0.00170052	0.339074	49	334964
Q99683	M3K5_HUMAN	M3K5	Mitogen-activated protein kinase kinase kinase 5	0.00169617	0.339406	38	339128
P14672	GTR4_HUMAN	GTR4	Solute carrier family 2, facilitated glucose transporter member 4	0.00167874	0.309513	20	275650
P62263	RS14_HUMAN	RS14	40S ribosomal protein S14	0.00166603	0.347229	40	311222
Q00653	NFKB2_HUMAN	NFKB2	Nuclear factor NF-kappa-B p100 subunit	0.00165822	0.344913	90	563700
P09471	GNAO_HUMAN	GNAO	Guanine nucleotide-binding protein G(o) subunit alpha	0.00165798	0.296027	35	329396
P17948	VGFR1_HUMAN	VGFR1	Vascular endothelial growth factor receptor 1	0.00165334	0.335431	26	316446
P02745	C1QA_HUMAN	C1QA	Complement C1q subcomponent subunit A	0.0016444	0.286435	13	204632
O75533	SF3B1_HUMAN	SF3B1	Splicing factor 3B subunit 1	0.00162871	0.336833	71	366248
P29475	NOS1_HUMAN	NOS1	Nitric oxide synthase, brain	0.00161979	0.318767	15	214360
Q15654	TRIP6_HUMAN	TRIP6	Thyroid receptor-interacting protein 6	0.00161444	0.326794	27	265756
P48551	INAR2_HUMAN	INAR2	Interferon-alpha/beta receptor beta chain	0.00160805	0.313433	17	274092
P25054	APC_HUMAN	APC	Adenomatous polyposis coli protein	0.00160257	0.333558	31	258034
P46937	YAP1_HUMAN	YAP1	65 kDa Yes-associated protein	0.00159851	0.316121	18	259808
P14859	PO2F1_HUMAN	PO2F1	POU domain, class 2, transcription factor 1	0.00159768	0.324135	32	314570
Q9UER7	DAXX_HUMAN	DAXX	Death domain-associated protein 6	0.00159577	0.336212	39	288428
Q9NQC3	RTN4_HUMAN	RTN4	Reticulon-4	0.00159049	0.326979	16	248288
O15116	LSM1_HUMAN	LSM1	U6 snRNA-associated Sm-like protein LSm1	0.0015861	0.294268	7	201340
Q9NS23	RASF1_HUMAN	RASF1	Ras association domain-containing protein 1	0.00158488	0.321906	17	205046
P16234	PGFRA_HUMAN	PGFRA	Alpha-type platelet-derived growth factor receptor	0.0015844	0.332661	28	302090
P09874	PARP1_HUMAN	PARP1	Poly [ADP-ribose] polymerase 1	0.00157387	0.339872	39	338586
P16220	CREB1_HUMAN	CREB1	cAMP response element-binding protein	0.0015685	0.340809	36	293686
P15336	ATF2_HUMAN	ATF2	Cyclic AMP-dependent transcription factor ATF-2	0.00155297	0.330724	41	359332
O95163	ELP1_HUMAN	ELP1	Elongator complex protein 1	0.00155279	0.309016	17	269940
P52292	IMA2_HUMAN	IMA2	Importin subunit alpha-2	0.00154756	0.330063	39	331554
P16112	PGCA_HUMAN	PGCA	Aggrecan core protein	0.00154686	0.254051	12	254872
Q9HC98	NEK6_HUMAN	NEK6	Serine/threonine-protein kinase Nek6	0.00154565	0.312895	22	241810
Q12778	FOXO1_HUMAN	FOXO1	Forkhead box protein O1	0.00154537	0.340206	26	301954
P05107	ITB2_HUMAN	ITB2	Integrin beta-2	0.0015448	0.323832	32	288870
P30679	GNA15_HUMAN	GNA15	Guanine nucleotide-binding protein subunit alpha-15	0.00153296	0.292677	17	239702
Q14118	DAG1_HUMAN	DAG1	Dystroglycan	0.00153032	0.329216	21	261276
Q92831	PCAF_HUMAN	PCAF	Histone acetyltransferase PCAF	0.00152329	0.332374	53	324528
P50281	MMP14_HUMAN	MMP14	Matrix metalloproteinase-14	0.00152253	0.310095	16	262758
O00206	TLR4_HUMAN	TLR4	Toll-like receptor 4	0.00152223	0.311349	18	255938
Q02750	MP2K1_HUMAN	MP2K1	Dual specificity mitogen-activated protein kinase kinase 1	0.00151518	0.352708	43	374270
Q15628	TRADD_HUMAN	TRADD	Tumor necrosis factor receptor type 1-associated DEATH domain protein	0.00151109	0.336866	48	411676
P62877	RBX1_HUMAN	RBX1	RING-box protein 1	0.00151065	0.321369	26	243450
Q13114	TRAF3_HUMAN	TRAF3	TNF receptor-associated factor 3	0.00150898	0.323469	38	327480
P56524	HDAC4_HUMAN	HDAC4	Histone deacetylase 4	0.00150875	0.334105	38	338568
Q13363	CTBP1_HUMAN	CTBP1	C-terminal-binding protein 1	0.00149107	0.315833	35	273450
Q07817	BCLX_HUMAN	BCLX	Apoptosis regulator Bcl-X	0.00148813	0.325352	41	299316
P15941	MUC1_HUMAN	MUC1	Mucin-1	0.00148706	0.338379	20	225920
P01891	1A68_HUMAN	1A68	HLA class I histocompatibility antigen, A-68 alpha chain	0.00148606	0.313404	20	289134
P01100	FOS_HUMAN	FOS	Proto-oncogene protein c-fos	0.00147605	0.339506	48	348594
O00230	CORT_HUMAN	CORT	CortistatinCortistatin-29Cortistatin-17	0.00146394	0.237932	7	215318
P02545	LMNA_HUMAN	LMNA	Lamin-A/C	0.00146296	0.357438	32	326916
P06756	ITAV_HUMAN	ITAV	Integrin alpha-V	0.00145927	0.328312	32	262876
P63027	VAMP2_HUMAN	VAMP2	Vesicle-associated membrane protein 2	0.00145815	0.262619	12	213144
Q92736	RYR2_HUMAN	RYR2	Ryanodine receptor 2	0.00145789	0.301121	16	188048
Q5JWF2	GNAS1_HUMAN	GNAS1	Guanine nucleotide-binding protein G(s) subunit alpha isoforms XLas	0.00145447	0.293321	29	242918
P63010	AP2B1_HUMAN	AP2B1	AP-2 complex subunit beta-1	0.00145361	0.327041	17	215458
P02462	CO4A1_HUMAN	CO4A1	Collagen alpha-1(IV) chain	0.00144737	0.30086	22	307078
P35579	MYH9_HUMAN	MYH9	Myosin-9	0.00144511	0.350886	28	361082
O95782	AP2A1_HUMAN	AP2A1	AP-2 complex subunit alpha-1	0.00144267	0.335626	26	229428
Q16665	HIF1A_HUMAN	HIF1A	Hypoxia-inducible factor 1 alpha	0.00144245	0.336342	32	296646
P32745	SSR3_HUMAN	SSR3	Somatostatin receptor type 3	0.00143227	0.28535	4	217478
Q06609	RAD51_HUMAN	RAD51	DNA repair protein RAD51 homolog 1	0.00143049	0.322056	21	214990
P09104	ENOG_HUMAN	ENOG	Gamma-enolase	0.0014268	0.26823	6	177266
Q15599	NHRF2_HUMAN	NHRF2	Na(+)/H(+) exchange regulatory cofactor NHE-RF2	0.0014222	0.310623	22	247762
Q14643	ITPR1_HUMAN	ITPR1	Inositol 1,4,5-trisphosphate receptor type 1	0.0014189	0.323047	19	201474
Q8TEW0	PARD3_HUMAN	PARD3	Partitioning defective 3 homolog	0.00141715	0.326825	29	286210
O75340	PDCD6_HUMAN	PDCD6	Programmed cell death protein 6	0.00141628	0.323378	17	184946
O15524	SOCS1_HUMAN	SOCS1	Suppressor of cytokine signaling 1	0.00141431	0.345464	38	303700
P55210	CASP7_HUMAN	CASP7	Caspase-7	0.00141255	0.340775	40	300666
P17693	HLAG_HUMAN	HLAG	HLA class I histocompatibility antigen, alpha chain G	0.00140939	0.270239	16	169024
Q13009	TIAM1_HUMAN	TIAM1	T-lymphoma invasion and metastasis-inducing protein 1	0.00140376	0.33739	24	228716
P42771	CD2A1_HUMAN	CD2A1	Cyclin-dependent kinase inhibitor 2A, isoforms 1/2/3	0.00139669	0.333815	35	308834
Q96KM6	Z512B_HUMAN	Z512B	Zinc finger protein 512B	0.00139248	0.311713	20	175746
P46527	CDN1B_HUMAN	CDN1B	Cyclin-dependent kinase inhibitor 1B	0.00138965	0.348521	38	306000
P05141	ADT2_HUMAN	ADT2	ADP/ATP translocase 2	0.00138758	0.345533	85	450030
Q08209	PP2BA_HUMAN	PP2BA	Serine/threonine-protein phosphatase 2B catalytic subunit alpha isoform	0.00138591	0.322896	23	215526
Q9H422	HIPK3_HUMAN	HIPK3	Homeodomain-interacting protein kinase 3	0.00138306	0.313433	16	209156
O00141	SGK1_HUMAN	SGK1	Serine/threonine-protein kinase Sgk1	0.00137958	0.318153	30	240230
P48736	PK3CG_HUMAN	PK3CG	Phosphatidylinositol-4,5-bisphosphate 3-kinase catalytic subunit gamma isoform	0.00137928	0.322987	19	211908
P04156	PRIO_HUMAN	PRIO	Major prion protein	0.00136779	0.331547	22	201716
P08138	TNR16_HUMAN	TNR16	Tumor necrosis factor receptor superfamily member 16	0.00136744	0.335626	23	246980
P19235	EPOR_HUMAN	EPOR	Erythropoietin receptor	0.00136562	0.33934	38	289450
Q9BYF1	ACE2_HUMAN	ACE2	Angiotensin-converting enzyme 2	0.00136514	0.271	4	167688
Q8IXH7	NELFD_HUMAN	NELFD	Negative elongation factor C/D	0.00135887	0.292751	14	193640
Q04724	TLE1_HUMAN	TLE1	Transducin-like enhancer protein 1	0.00135839	0.314742	27	192036
P31943	HNRH1_HUMAN	HNRH1	Heterogeneous nuclear ribonucleoprotein H	0.00135505	0.363474	59	379294
P78347	GTF2I_HUMAN	GTF2I	General transcription factor II-I	0.00134835	0.342324	37	319688
Q99062	CSF3R_HUMAN	CSF3R	Granulocyte colony-stimulating factor receptor	0.00133978	0.324165	19	232754
O00161	SNP23_HUMAN	SNP23	Synaptosomal-associated protein 23	0.00133837	0.291888	12	189878
Q9UBS5	GABR1_HUMAN	GABR1	Gamma-aminobutyric acid type B receptor subunit 1	0.00131986	0.329906	14	246112
O75582	KS6A5_HUMAN	KS6A5	Ribosomal protein S6 kinase alpha-5	0.00131628	0.318591	25	259228
P78545	ELF3_HUMAN	ELF3	ETS-related transcription factor Elf-3	0.00131579	0.33142	19	211886
Q9UQM7	KCC2A_HUMAN	KCC2A	Calcium/calmodulin-dependent protein kinase type II alpha chain	0.00131419	0.328218	32	220660
Q03405	UPAR_HUMAN	UPAR	Urokinase plasminogen activator surface receptor	0.00130424	0.319708	19	204348
P62714	PP2AB_HUMAN	PP2AB	Serine/threonine-protein phosphatase 2A catalytic subunit beta isoform	0.00129941	0.334847	36	251668
P62834	RAP1A_HUMAN	RAP1A	Ras-related protein Rap-1A	0.0012956	0.320774	29	236738
P05386	RLA1_HUMAN	RLA1	60S acidic ribosomal protein P1	0.00129536	0.340106	49	251952
Q15717	ELAV1_HUMAN	ELAV1	ELAV-like protein 1	0.00129497	0.310234	50	376922
Q9HCE7	SMUF1_HUMAN	SMUF1	E3 ubiquitin-protein ligase SMURF1	0.00128932	0.315115	27	230990
Q01105	SET_HUMAN	SET	Protein SET	0.00128796	0.342087	34	298790
Q9Y383	LC7L2_HUMAN	LC7L2	Putative RNA-binding protein Luc7-like 2	0.00128717	0.319886	16	172410
Q13617	CUL2_HUMAN	CUL2	Cullin-2	0.00128267	0.325872	37	203622
P41220	RGS2_HUMAN	RGS2	Regulator of G-protein signaling 2	0.00128221	0.314143	20	208754
P15880	RS2_HUMAN	RS2	40S ribosomal protein S2	0.00128142	0.328935	78	307106
P16144	ITB4_HUMAN	ITB4	Integrin beta-4	0.0012793	0.339074	23	259372
P07585	PGS2_HUMAN	PGS2	Decorin	0.00127782	0.310623	19	205922
P29323	EPHB2_HUMAN	EPHB2	Ephrin type-B receptor 2	0.00127731	0.335919	26	222142
P07550	ADRB2_HUMAN	ADRB2	Beta-2 adrenergic receptor	0.00127581	0.331833	21	214162
O95751	LDOC1_HUMAN	LDOC1	Protein LDOC1	0.00126972	0.28791	12	197120
P30556	AGTR1_HUMAN	AGTR1	Type-1 angiotensin II receptor	0.00126769	0.33063	20	229058
P30273	FCERG_HUMAN	FCERG	High affinity immunoglobulin epsilon receptor subunit gamma	0.00126532	0.309016	12	208764
O43665	RGS10_HUMAN	RGS10	Regulator of G-protein signaling 10	0.00126382	0.288222	6	204174
Q96SB3	NEB2_HUMAN	NEB2	Neurabin-2	0.00126293	0.330598	23	196294
P33151	CADH5_HUMAN	CADH5	Cadherin-5	0.00125907	0.318562	17	199606
P68032	ACTC_HUMAN	ACTC	Actin, alpha cardiac muscle 1	0.00125173	0.333333	24	193204
Q15750	TAB1_HUMAN	TAB1	Mitogen-activated protein kinase kinase kinase 7-interacting protein 1	0.00125161	0.34101	42	281750
P24158	PRTN3_HUMAN	PRTN3	Myeloblastin	0.00124961	0.303203	13	154464
P36873	PP1G_HUMAN	PP1G	Serine/threonine-protein phosphatase PP1-gamma catalytic subunit	0.00124863	0.334589	30	260608
O14775	GBB5_HUMAN	GBB5	Guanine nucleotide-binding protein subunit beta-5	0.00124835	0.251652	12	204238
P11309	PIM1_HUMAN	PIM1	Proto-oncogene serine/threonine-protein kinase Pim-1	0.00124759	0.306393	12	165834
P07949	RET_HUMAN	RET	Proto-oncogene tyrosine-protein kinase receptor ret	0.00123864	0.33871	31	222280
P41240	CSK_HUMAN	CSK	Tyrosine-protein kinase CSK	0.001223	0.353391	46	309064
O94817	ATG12_HUMAN	ATG12	Autophagy-related protein 12	0.00122282	0.300026	15	179260
Q9HD67	MYO10_HUMAN	MYO10	Myosin-X	0.00122137	0.297732	8	176374
Q13131	AAPK1_HUMAN	AAPK1	5'-AMP-activated protein kinase catalytic subunit alpha-1	0.00122111	0.313944	14	180110
P29317	EPHA2_HUMAN	EPHA2	Ephrin type-A receptor 2	0.00122044	0.326825	18	180156
O00571	DDX3X_HUMAN	DDX3X	ATP-dependent RNA helicase DDX3X	0.00121974	0.359925	67	387766
P01275	GLUC_HUMAN	GLUC	GlucagonGlicentinGlicentin-related polypeptideOxyntomodulinGlucagonGlucagon-like peptide 1Glucagon-like peptide 1(7-37)Glucagon-like peptide 1(7-36)Glucagon-like peptide 2	0.00121519	0.245119	6	146652
P23229	ITA6_HUMAN	ITA6	Integrin alpha-6	0.00121441	0.324986	22	263544
P10071	GLI3_HUMAN	GLI3	Zinc finger protein GLI3	0.00121317	0.293793	10	243880
P01042	KNG1_HUMAN	KNG1	Kininogen-1	0.00121256	0.293918	19	158792
P60033	CD81_HUMAN	CD81	CD81 antigen	0.00120953	0.317162	23	202586
Q92956	TNR14_HUMAN	TNR14	Tumor necrosis factor receptor superfamily member 14	0.00120849	0.332374	28	205714
P55211	CASP9_HUMAN	CASP9	Caspase-9	0.00120377	0.333815	33	250040
P49802	RGS7_HUMAN	RGS7	Regulator of G-protein signaling 7	0.0012005	0.315201	12	206840
Q96JB5	CK5P3_HUMAN	CK5P3	CDK5 regulatory subunit-associated protein 3	0.00119128	0.309596	13	175198
P48023	TNFL6_HUMAN	TNFL6	Tumor necrosis factor ligand superfamily member 6	0.00118449	0.346673	31	271260
P05388	RLA0_HUMAN	RLA0	60S acidic ribosomal protein P0	0.00118414	0.355823	88	421486
P07306	ASGR1_HUMAN	ASGR1	Asialoglycoprotein receptor 1	0.00118245	0.287934	6	151910
P98082	DAB2_HUMAN	DAB2	Disabled homolog 2	0.00117995	0.350851	29	297476
P34741	SDC2_HUMAN	SDC2	Syndecan-2	0.00117811	0.312585	23	167512
O00470	MEIS1_HUMAN	MEIS1	Homeobox protein Meis1	0.00117792	0.263298	8	218598
Q16778	H2B2E_HUMAN	H2B2E	Histone H2B type 2-E	0.00117781	0.321309	37	220572
P54198	HIRA_HUMAN	HIRA	Protein HIRA	0.00117527	0.275022	8	215428
P14923	PLAK_HUMAN	PLAK	Junction plakoglobin	0.00117447	0.33022	34	232768
Q99836	MYD88_HUMAN	MYD88	Myeloid differentiation primary response protein MyD88	0.00117243	0.299068	26	198332
P35609	ACTN2_HUMAN	ACTN2	Alpha-actinin-2	0.00116564	0.31366	30	176818
P17936	IBP3_HUMAN	IBP3	Insulin-like growth factor-binding protein 3	0.00116461	0.317919	22	200120
Q13387	JIP2_HUMAN	JIP2	C-jun-amino-terminal kinase-interacting protein 2	0.00116345	0.310317	19	187914
Q8N6P7	I22R1_HUMAN	I22R1	Interleukin-22 receptor subunit alpha-1	0.00116254	0.269944	2	170406
Q9NRL2	BAZ1A_HUMAN	BAZ1A	Bromodomain adjacent to zinc finger domain protein 1A	0.00115931	0.272792	4	184590
P15056	BRAF1_HUMAN	BRAF1	B-Raf proto-oncogene serine/threonine-protein kinase	0.0011587	0.347334	33	245996
P02746	C1QB_HUMAN	C1QB	Complement C1q subcomponent subunit B	0.00115656	0.231339	5	140256
P30626	SORCN_HUMAN	SORCN	Sorcin	0.00115542	0.282696	11	137438
P02708	ACHA_HUMAN	ACHA	Acetylcholine receptor subunit alpha	0.00115535	0.235378	4	141430
P30926	ACHB4_HUMAN	ACHB4	Neuronal acetylcholine receptor subunit beta-4	0.00115432	0.177066	4	191768
O43586	PPIP1_HUMAN	PPIP1	Proline-serine-threonine phosphatase-interacting protein 1	0.00115429	0.304428	17	184424
P22466	GALA_HUMAN	GALA	GalaninGalaninGalanin message-associated peptide	0.00115423	0.19363	3	172290
O14950	MRLC2_HUMAN	MRLC2	Myosin regulatory light chain MRLC2	0.00115423	0.273308	3	186910
Q9UBL9	P2RX2_HUMAN	P2RX2	P2X purinoceptor 2	0.00115423	0.238193	5	124310
Q15116	PDCD1_HUMAN	PDCD1	Programmed cell death protein 1	0.00115423	0.300468	15	192050
Q12770	SCAP_HUMAN	SCAP	Sterol regulatory element-binding protein cleavage-activating protein	0.00115423	0.23037	5	252890
P16188	1A30_HUMAN	1A30	HLA class I histocompatibility antigen, A-30 alpha chain	0.00115407	0.1889	2	132440
Q6NZI2	PTRF_HUMAN	PTRF	Polymerase I and transcript release factor	0.00115407	0.253772	2	158736
O14802	RPC1_HUMAN	RPC1	DNA-directed RNA polymerase III subunit RPC1	0.00115407	0.239759	2	147740
P47992	XCL1_HUMAN	XCL1	Lymphotactin	0.00115407	0.216942	4	167660
P39023	RL3_HUMAN	RL3	60S ribosomal protein L3	0.00114401	0.345188	49	330602
P42345	FRAP_HUMAN	FRAP	FKBP12-rapamycin complex-associated protein	0.00114017	0.332949	28	198916
P13612	ITA4_HUMAN	ITA4	Integrin alpha-4	0.00113084	0.31093	20	210898
P06401	PRGR_HUMAN	PRGR	Progesterone receptor	0.001129	0.324347	21	176390
O43613	OX1R_HUMAN	OX1R	Orexin receptor type 1	0.00112881	0.22159	2	154504
Q9Y297	FBW1A_HUMAN	FBW1A	F-box/WD repeat-containing protein 1A	0.00112326	0.324895	28	197008
Q07001	ACHD_HUMAN	ACHD	Acetylcholine receptor subunit delta	0.00112146	0.294243	2	148836
P15924	DESP_HUMAN	DESP	Desmoplakin	0.00111827	0.326733	32	194350
P49146	NPY2R_HUMAN	NPY2R	Neuropeptide Y receptor type 2	0.00111635	0.238226	5	150906
Q9UKY1	ZHX1_HUMAN	ZHX1	Zinc fingers and homeoboxes protein 1	0.00111524	0.311965	20	157664
P09769	FGR_HUMAN	FGR	Proto-oncogene tyrosine-protein kinase FGR	0.00111475	0.33142	21	218800
P05129	KPCG_HUMAN	KPCG	Protein kinase C gamma type	0.00111403	0.322806	34	207468
P28472	GBRB3_HUMAN	GBRB3	Gamma-aminobutyric acid receptor subunit beta-3	0.00111254	0.303681	13	181876
Q9H2X6	HIPK2_HUMAN	HIPK2	Homeodomain-interacting protein kinase 2	0.00110804	0.322236	30	202984
P50402	EMD_HUMAN	EMD	Emerin	0.0011076	0.330378	31	201942
Q13635	PTC1_HUMAN	PTC1	Protein patched homolog 1	0.00109891	0.273545	7	209004
P20963	CD3Z_HUMAN	CD3Z	T-cell surface glycoprotein CD3 zeta chain	0.00109646	0.326026	33	201762
P61244	MAX_HUMAN	MAX	Protein max	0.00109203	0.312387	20	176340
Q15311	RBP1_HUMAN	RBP1	RalA-binding protein 1	0.00109196	0.325995	21	181512
P08908	5HT1A_HUMAN	5HT1A	5-hydroxytryptamine receptor 1A	0.00108603	0.255644	11	199044
Q96EB6	SIRT1_HUMAN	SIRT1	NAD-dependent deacetylase sirtuin-1	0.00108408	0.319738	25	202704
Q99717	SMAD5_HUMAN	SMAD5	Mothers against decapentaplegic homolog 5	0.00108051	0.306529	18	172026
Q9Y6C5	PTC2_HUMAN	PTC2	Protein patched homolog 2	0.00108033	0.274	5	220260
O14939	PLD2_HUMAN	PLD2	Phospholipase D2	0.00107615	0.345808	27	234376
O94992	HEXI1_HUMAN	HEXI1	Protein HEXIM1	0.00107368	0.311153	12	215376
P30518	V2R_HUMAN	V2R	Vasopressin V2 receptor	0.00107175	0.311965	9	182442
Q13347	EIF3I_HUMAN	EIF3I	Eukaryotic translation initiation factor 3 subunit I	0.00107011	0.354839	56	321066
P51587	BRCA2_HUMAN	BRCA2	Breast cancer type 2 susceptibility protein	0.00106473	0.336212	17	181110
P00734	THRB_HUMAN	THRB	Prothrombin	0.00106016	0.292726	26	171534
Q13501	SQSTM_HUMAN	SQSTM	Sequestosome-1	0.00105627	0.335301	28	210136
O95999	BCL10_HUMAN	BCL10	B-cell lymphoma/leukemia 10	0.0010554	0.316959	23	203580
Q13546	RIPK1_HUMAN	RIPK1	Receptor-interacting serine/threonine-protein kinase 1	0.00105006	0.335691	37	247632
Q05193	DYN1_HUMAN	DYN1	Dynamin-1	0.00104961	0.351206	34	261102
P34931	HS71L_HUMAN	HS71L	Heat shock 70 kDa protein 1L	0.00104799	0.349823	32	368136
P38432	P80C_HUMAN	P80C	Coilin	0.00104523	0.303681	19	152540
P32927	IL3RB_HUMAN	IL3RB	Cytokine receptor common subunit beta	0.00103766	0.334201	29	224024
Q12802	AKP13_HUMAN	AKP13	A-kinase anchor protein 13	0.00103632	0.322116	15	177874
O14672	ADA10_HUMAN	ADA10	ADAM 10	0.00103436	0.321429	11	128616
P22455	FGFR4_HUMAN	FGFR4	Fibroblast growth factor receptor 4	0.00103321	0.295699	19	201932
Q07889	SOS1_HUMAN	SOS1	Son of sevenless homolog 1	0.00103195	0.352385	47	235156
Q13555	KCC2G_HUMAN	KCC2G	Calcium/calmodulin-dependent protein kinase type II gamma chain	0.00102116	0.328685	25	180322
P42336	PK3CA_HUMAN	PK3CA	Phosphatidylinositol-4,5-bisphosphate 3-kinase catalytic subunit alpha isoform	0.00102053	0.32735	29	191166
P61073	CXCR4_HUMAN	CXCR4	C-X-C chemokine receptor type 4	0.00101643	0.332949	28	229846
P55072	TERA_HUMAN	TERA	Transitional endoplasmic reticulum ATPase	0.00101531	0.335723	26	211630
Q01082	SPTB2_HUMAN	SPTB2	Spectrin beta chain, brain 1	0.00101175	0.349118	19	229280
Q07666	KHDR1_HUMAN	KHDR1	KH domain-containing, RNA-binding, signal transduction-associated protein 1	0.00101117	0.35192	38	289176
Q9Y2G2	CARD8_HUMAN	CARD8	Caspase recruitment domain-containing protein 8	0.00100682	0.288126	11	158398
P19320	VCAM1_HUMAN	VCAM1	Vascular cell adhesion protein 1	0.00100493	0.284343	13	175700
P04083	ANXA1_HUMAN	ANXA1	Annexin A1	0.00100258	0.353211	51	244302
P46940	IQGA1_HUMAN	IQGA1	Ras GTPase-activating-like protein IQGAP1	0.00099979	0.348066	26	241924
P48729	KC1A_HUMAN	KC1A	Casein kinase I isoform alpha	0.0009991	0.334815	27	190548
P04628	WNT1_HUMAN	WNT1	Proto-oncogene protein Wnt-1	0.00099745	0.22283	5	187352
Q9H204	MED28_HUMAN	MED28	Mediator of RNA polymerase II transcription subunit 28	0.00099655	0.323499	12	131024
P47872	SCTR_HUMAN	SCTR	Secretin receptor	0.00099399	0.294418	6	154404
Q96B26	EXOS8_HUMAN	EXOS8	Exosome complex exonuclease RRP43	0.00099138	0.247359	6	129926
Q96RT1	LAP2_HUMAN	LAP2	Protein LAP2	0.0009895	0.314172	22	188916
O75489	NDUS3_HUMAN	NDUS3	NADH dehydrogenase [ubiquinone] iron-sulfur protein 3, mitochondrial	0.00098704	0.270957	10	251056
P26599	PTBP1_HUMAN	PTBP1	Polypyrimidine tract-binding protein 1	0.00098657	0.335009	20	145884
P35813	PPM1A_HUMAN	PPM1A	Protein phosphatase 1A	0.0009864	0.324165	14	159726
P35658	NU214_HUMAN	NU214	Nuclear pore complex protein Nup214	0.00098485	0.297834	10	153406
P14416	DRD2_HUMAN	DRD2	D(2) dopamine receptor	0.00098474	0.295145	9	128608
O00254	PAR3_HUMAN	PAR3	Proteinase-activated receptor 3	0.00098445	0.323137	12	159206
P98161	PKD1_HUMAN	PKD1	Polycystin-1	0.00098163	0.33795	24	207570
P27540	ARNT_HUMAN	ARNT	Aryl hydrocarbon receptor nuclear translocator	0.00097399	0.328001	20	161232
Q93038	TNR25_HUMAN	TNR25	Tumor necrosis factor receptor superfamily member 25	0.00097205	0.298039	6	155116
P49815	TSC2_HUMAN	TSC2	Tuberin	0.00097164	0.33828	30	202580
Q9Y2X7	GIT1_HUMAN	GIT1	ARF GTPase-activating protein GIT1	0.00097077	0.331104	28	188318
O60603	TLR2_HUMAN	TLR2	Toll-like receptor 2	0.00096925	0.318797	19	175522
P83731	RL24_HUMAN	RL24	60S ribosomal protein L24	0.00096318	0.347717	79	328414
O60506	HNRPQ_HUMAN	HNRPQ	Heterogeneous nuclear ribonucleoprotein Q	0.00096056	0.341245	56	271984
Q9UQ80	PA2G4_HUMAN	PA2G4	Proliferation-associated protein 2G4	0.0009596	0.339739	26	240252
Q01094	E2F1_HUMAN	E2F1	Transcription factor E2F1	0.00095946	0.325872	37	204698
P27694	RFA1_HUMAN	RFA1	Replication protein A 70 kDa DNA-binding subunit	0.00095732	0.309568	16	148694
P04792	HSPB1_HUMAN	HSPB1	Heat shock protein beta-1	0.00095727	0.34536	20	217446
P98170	BIRC4_HUMAN	BIRC4	Baculoviral IAP repeat-containing protein 4	0.00095539	0.312952	21	182786
P49810	PSN2_HUMAN	PSN2	Presenilin-2	0.00095482	0.322446	26	184166
Q14511	CASL_HUMAN	CASL	Enhancer of filamentation 1	0.00095026	0.334944	30	217448
P12236	ADT3_HUMAN	ADT3	ADP/ATP translocase 3	0.00094893	0.331769	54	256092
P23443	KS6B1_HUMAN	KS6B1	Ribosomal protein S6 kinase beta-1	0.00094706	0.341615	30	195052
Q15653	IKBB_HUMAN	IKBB	NF-kappa-B inhibitor beta	0.00094604	0.334686	54	270160
Q92934	BAD_HUMAN	BAD	Bcl2 antagonist of cell death	0.0009438	0.338577	28	193380
P53621	COPA_HUMAN	COPA	Coatomer subunit alpha	0.00094253	0.317657	53	228732
P49662	CASP4_HUMAN	CASP4	Caspase-4	0.00094122	0.308961	26	131886
P01889	1B07_HUMAN	1B07	HLA class I histocompatibility antigen, B-7 alpha chain	0.00093522	0.29974	16	181940
P10828	THB_HUMAN	THB	Thyroid hormone receptor beta	0.00093336	0.326733	27	199472
O00253	AGRP_HUMAN	AGRP	Agouti-related protein	0.00093179	0.218957	4	174676
P05787	K2C8_HUMAN	K2C8	Keratin, type II cytoskeletal 8	0.00093077	0.337752	19	157376
P07814	SYEP_HUMAN	SYEP	Bifunctional aminoacyl-tRNA synthetase	0.00092994	0.333976	65	256048
P10644	KAP0_HUMAN	KAP0	cAMP-dependent protein kinase type I-alpha regulatory subunit	0.00092714	0.332725	15	154030
P28799	GRN_HUMAN	GRN	Granulins	0.00092666	0.285044	9	109046
P10586	PTPRF_HUMAN	PTPRF	Receptor-type tyrosine-protein phosphatase F	0.00092582	0.323258	24	177752
P00750	TPA_HUMAN	TPA	Tissue-type plasminogen activatorTissue-type plasminogen activator chain ATissue-type plasminogen activator chain B	0.00092452	0.314714	20	172292
O15145	ARPC3_HUMAN	ARPC3	Actin-related protein 2/3 complex subunit 3	0.00092235	0.302832	13	134712
P08311	CATG_HUMAN	CATG	Cathepsin G	0.00092159	0.304375	22	141474
Q9NRM6	I17RB_HUMAN	I17RB	Interleukin-17 receptor B	0.00091908	0.276647	3	144126
Q01201	RELB_HUMAN	RELB	Transcription factor RelB	0.00091751	0.328716	43	241788
Q15369	ELOC_HUMAN	ELOC	Transcription elongation factor B polypeptide 1	0.00091367	0.310985	13	132832
O15530	PDPK1_HUMAN	PDPK1	3-phosphoinositide-dependent protein kinase 1	0.00090924	0.34034	34	187570
Q8IW41	MAPK5_HUMAN	MAPK5	MAP kinase-activated protein kinase 5	0.00090821	0.308879	16	146794
O00459	P85B_HUMAN	P85B	Phosphatidylinositol 3-kinase regulatory subunit beta	0.00090807	0.341211	35	223252
O15230	LAMA5_HUMAN	LAMA5	Laminin subunit alpha-5	0.00090271	0.292183	12	119240
Q15139	KPCD1_HUMAN	KPCD1	Serine/threonine-protein kinase D1	0.00090082	0.340842	24	166610
Q9NPH3	IL1AP_HUMAN	IL1AP	Interleukin-1 receptor accessory protein	0.00089926	0.307018	14	120980
P34932	HSP74_HUMAN	HSP74	Heat shock 70 kDa protein 4	0.00089875	0.328748	24	185390
P08648	ITA5_HUMAN	ITA5	Integrin alpha-5	0.00089798	0.312106	22	157228
Q9UNM6	PSD13_HUMAN	PSD13	26S proteasome non-ATPase regulatory subunit 13	0.00089721	0.316207	16	153526
P32239	GASR_HUMAN	GASR	Gastrin/cholecystokinin type B receptor	0.0008963	0.31543	11	136664
P45984	MK09_HUMAN	MK09	Mitogen-activated protein kinase 9	0.00089575	0.324712	30	178798
Q07912	ACK1_HUMAN	ACK1	Activated CDC42 kinase 1	0.00089564	0.324529	10	121852
P20339	RAB5A_HUMAN	RAB5A	Ras-related protein Rab-5A	0.00089476	0.294693	21	148942
Q13002	GRIK2_HUMAN	GRIK2	Glutamate receptor, ionotropic kainate 2	0.00089329	0.292479	15	132054
Q14005	IL16_HUMAN	IL16	Interleukin-16	0.00089085	0.306691	15	142168
P31785	IL2RG_HUMAN	IL2RG	Cytokine receptor common gamma chain	0.00089004	0.31383	20	152454
P42566	EP15_HUMAN	EP15	Epidermal growth factor receptor substrate 15	0.00088925	0.328343	24	149418
Q08722	CD47_HUMAN	CD47	Leukocyte surface antigen CD47	0.00088305	0.297629	14	134676
P19022	CADH2_HUMAN	CADH2	Cadherin-2	0.00087985	0.317832	17	153218
P13861	KAP2_HUMAN	KAP2	cAMP-dependent protein kinase type II-alpha regulatory subunit	0.00087944	0.319649	22	148592
Q12923	PTN13_HUMAN	PTN13	Tyrosine-protein phosphatase non-receptor type 13	0.00087851	0.316699	15	136226
P84095	RHOG_HUMAN	RHOG	Rho-related GTP-binding protein RhoG	0.00087849	0.29809	14	146320
P51692	STA5B_HUMAN	STA5B	Signal transducer and activator of transcription 5B	0.00087786	0.34375	43	265666
P84090	ERH_HUMAN	ERH	Enhancer of rudimentary homolog	0.00087659	0.323892	12	135176
Q02818	NUCB1_HUMAN	NUCB1	Nucleobindin-1	0.00087545	0.288246	9	149734
Q9Y5K6	CD2AP_HUMAN	CD2AP	CD2-associated protein	0.00087146	0.328779	23	167416
P23945	FSHR_HUMAN	FSHR	Follicle-stimulating hormone receptor	0.00087139	0.296992	14	117238
Q13045	FLII_HUMAN	FLII	Protein flightless-1 homolog	0.00086877	0.318445	9	109314
P34995	PE2R1_HUMAN	PE2R1	Prostaglandin E2 receptor EP1 subtype	0.00086563	0.178259	3	210042
Q9BQG0	MBB1A_HUMAN	MBB1A	Myb-binding protein 1A	0.0008624	0.333686	66	212672
P07737	PROF1_HUMAN	PROF1	Profilin-1	0.00085538	0.321727	18	136126
P08246	ELNE_HUMAN	ELNE	Leukocyte elastase	0.00085521	0.285915	23	116762
P10912	GHR_HUMAN	GHR	Growth hormone receptor	0.00085471	0.328467	29	183348
Q12929	EPS8_HUMAN	EPS8	Epidermal growth factor receptor kinase substrate 8	0.000854	0.322626	20	145328
P58107	EPIPL_HUMAN	EPIPL	Epiplakin	0.0008535	0.332151	14	188400
P60484	PTEN_HUMAN	PTEN	Phosphatidylinositol-3,4,5-trisphosphate 3-phosphatase and dual-specificity protein phosphatase PTEN	0.00084819	0.335431	21	171848
P09651	ROA1_HUMAN	ROA1	Heterogeneous nuclear ribonucleoprotein A1	0.00084778	0.356592	56	247318
P18075	BMP7_HUMAN	BMP7	Bone morphogenetic protein 7	0.00084736	0.264161	12	187262
P01189	COLI_HUMAN	COLI	Corticotropin-lipotropin	0.0008472	0.216969	4	174480
P61978	HNRPK_HUMAN	HNRPK	Heterogeneous nuclear ribonucleoprotein K	0.00084419	0.355567	31	302872
P49795	RGS19_HUMAN	RGS19	Regulator of G-protein signaling 19	0.00084309	0.317861	10	144074
O14788	TNF11_HUMAN	TNF11	Tumor necrosis factor ligand superfamily member 11	0.0008392	0.327629	17	164302
O43561	LAT_HUMAN	LAT	Linker for activation of T-cells family member 1	0.00083857	0.33022	29	181646
P00736	C1R_HUMAN	C1R	Complement C1r subcomponent	0.00083513	0.277911	8	105412
P34947	GRK5_HUMAN	GRK5	G protein-coupled receptor kinase 5	0.00083418	0.298475	16	139820
Q9UHD2	TBK1_HUMAN	TBK1	Serine/threonine-protein kinase TBK1	0.00083282	0.336506	41	202184
P48634	BAT2_HUMAN	BAT2	Large proline-rich protein BAT2	0.00083243	0.3142	10	110208
P20248	CCNA2_HUMAN	CCNA2	Cyclin-A2	0.00083145	0.332119	29	189038
Q13352	CENPR_HUMAN	CENPR	Centromere protein R	0.0008298	0.315029	21	140514
Q13158	FADD_HUMAN	FADD	Protein FADD	0.00082404	0.327381	39	182812
P14151	LYAM1_HUMAN	LYAM1	L-selectin	0.00082317	0.32116	12	108824
Q96QZ7	MAGI1_HUMAN	MAGI1	Membrane-associated guanylate kinase, WW and PDZ domain-containing protein 1	0.00082099	0.302277	15	135408
Q01196	RUNX1_HUMAN	RUNX1	Runt-related transcription factor 1	0.00081743	0.313887	24	169656
Q04759	KPCT_HUMAN	KPCT	Protein kinase C theta type	0.00081112	0.335528	28	157476
P84077	ARF1_HUMAN	ARF1	ADP-ribosylation factor 1	0.00081088	0.30979	21	138896
Q9BUZ4	TRAF4_HUMAN	TRAF4	TNF receptor-associated factor 4	0.0008104	0.308274	14	113810
P28907	CD38_HUMAN	CD38	ADP-ribosyl cyclase 1	0.00080778	0.283668	6	181678
Q16576	RBBP7_HUMAN	RBBP7	Histone-binding protein RBBP7	0.00080566	0.336538	24	171020
O00548	DLL1_HUMAN	DLL1	Delta-like protein 1	0.00080495	0.269524	9	115314
Q9UKG1	DP13A_HUMAN	DP13A	DCC-interacting protein 13-alpha	0.00080472	0.317221	18	148774
O75251	NDUS7_HUMAN	NDUS7	NADH dehydrogenase [ubiquinone] iron-sulfur protein 7, mitochondrial	0.00080464	0.274782	7	172308
P61289	PSME3_HUMAN	PSME3	Proteasome activator complex subunit 3	0.0008038	0.326948	21	160014
P06730	IF4E_HUMAN	IF4E	Eukaryotic translation initiation factor 4E	0.00080294	0.320685	25	149500
P61604	CH10_HUMAN	CH10	10 kDa heat shock protein, mitochondrial	0.00079428	0.323228	17	169746
P28067	2DMA_HUMAN	2DMA	HLA class II histocompatibility antigen, DM alpha chain	0.00079287	0.239395	6	182488
Q09028	RBBP4_HUMAN	RBBP4	Histone-binding protein RBBP4	0.00079137	0.326733	34	171860
P42261	GRIA1_HUMAN	GRIA1	Glutamate receptor 1	0.00078734	0.314542	18	118220
P35613	BASI_HUMAN	BASI	Basigin	0.00078683	0.293993	13	109432
P48552	NRIP1_HUMAN	NRIP1	Nuclear receptor-interacting protein 1	0.00078595	0.321757	33	162424
O43639	NCK2_HUMAN	NCK2	Cytoplasmic protein NCK2	0.00078305	0.322476	29	161102
Q9H307	PININ_HUMAN	PININ	Pinin	0.00077983	0.301724	12	147020
P27037	AVR2A_HUMAN	AVR2A	Activin receptor type-2A	0.0007798	0.275656	18	134448
Q99689	FEZ1_HUMAN	FEZ1	Fasciculation and elongation protein zeta-1	0.00077968	0.293197	12	122766
P26358	DNMT1_HUMAN	DNMT1	DNA (cytosine-5)-methyltransferase 1	0.00077911	0.314943	21	119598
P08962	CD63_HUMAN	CD63	CD63 antigen	0.00077722	0.28411	16	186658
Q13137	CACO2_HUMAN	CACO2	Calcium-binding and coiled-coil domain-containing protein 2	0.00077526	0.309209	18	106334
P62937	PPIA_HUMAN	PPIA	Peptidyl-prolyl cis-trans isomerase A	0.00077495	0.33231	17	135406
Q04864	REL_HUMAN	REL	C-Rel proto-oncogene protein	0.00077355	0.339273	59	266096
P14778	IL1R1_HUMAN	IL1R1	Interleukin-1 receptor type I	0.00077338	0.307426	12	114824
O00401	WASL_HUMAN	WASL	Neural Wiskott-Aldrich syndrome protein	0.00077206	0.33739	25	157302
Q16602	CALRL_HUMAN	CALRL	Calcitonin gene-related peptide type 1 receptor	0.0007713	0.274021	4	139470
P61088	UBE2N_HUMAN	UBE2N	Ubiquitin-conjugating enzyme E2 N	0.00076779	0.29786	10	143864
P16104	H2AX_HUMAN	H2AX	Histone H2A.x	0.00076718	0.32459	35	134432
P62316	SMD2_HUMAN	SMD2	Small nuclear ribonucleoprotein Sm D2	0.00076657	0.328001	22	126512
P14678	RSMB_HUMAN	RSMB	Small nuclear ribonucleoprotein-associated proteins B and B'	0.000764	0.30052	22	121630
P14618	KPYM_HUMAN	KPYM	Pyruvate kinase isozymes M1/M2	0.00076264	0.329906	12	119012
P09601	HMOX1_HUMAN	HMOX1	Heme oxygenase 1	0.00076197	0.275656	6	109234
Q9Y4H2	IRS2_HUMAN	IRS2	Insulin receptor substrate 2	0.00076001	0.340641	35	216072
Q9H7B4	SMYD3_HUMAN	SMYD3	SET and MYND domain-containing protein 3	0.00075845	0.296204	7	111154
Q9NRG4	SMYD2_HUMAN	SMYD2	SET and MYND domain-containing protein 2	0.00075826	0.290517	12	126686
P21926	CD9_HUMAN	CD9	CD9 antigen	0.00075816	0.307535	25	144544
Q9HAV4	XPO5_HUMAN	XPO5	Exportin-5	0.00075803	0.318474	17	143834
P15391	CD19_HUMAN	CD19	B-lymphocyte antigen CD19	0.00075681	0.332183	22	153730
P29597	TYK2_HUMAN	TYK2	Non-receptor tyrosine-protein kinase TYK2	0.00075673	0.329969	29	173774
Q9UKV8	I2C2_HUMAN	I2C2	Eukaryotic translation initiation factor 2C 2	0.00075639	0.313433	57	230138
P62753	RS6_HUMAN	RS6	40S ribosomal protein S6	0.00075485	0.335074	80	238284
Q16586	SGCA_HUMAN	SGCA	Alpha-sarcoglycan	0.00075446	0.295926	5	132786
Q15418	KS6A1_HUMAN	KS6A1	Ribosomal protein S6 kinase alpha-1	0.00075083	0.337029	25	160212
Q9H1Y0	ATG5_HUMAN	ATG5	Autophagy protein 5	0.00075006	0.30086	25	147494
P07477	TRY1_HUMAN	TRY1	Trypsin-1	0.00074949	0.307126	6	97278
Q5VWK5	IL23R_HUMAN	IL23R	Interleukin-23 receptor	0.00074796	0.285185	4	116728
P50552	VASP_HUMAN	VASP	Vasodilator-stimulated phosphoprotein	0.00074776	0.313603	17	122066
P46934	NEDD4_HUMAN	NEDD4	E3 ubiquitin-protein ligase NEDD4	0.00074649	0.309182	24	127054
Q16594	TAF9_HUMAN	TAF9	Transcription initiation factor TFIID subunit 9	0.00074621	0.307263	14	138070
Q08345	DDR1_HUMAN	DDR1	Epithelial discoidin domain-containing receptor 1	0.00074501	0.298501	13	133812
Q13224	NMDE2_HUMAN	NMDE2	Glutamate [NMDA] receptor subunit epsilon-2	0.00074457	0.33231	27	160512
P11912	CD79A_HUMAN	CD79A	B-cell antigen receptor complex-associated protein alpha-chain	0.0007418	0.312641	19	115602
O96019	ACL6A_HUMAN	ACL6A	Actin-like protein 6A	0.00073875	0.3148	19	129882
P78396	CCNA1_HUMAN	CCNA1	Cyclin-A1	0.00073646	0.323499	29	144068
Q15910	EZH2_HUMAN	EZH2	Polycomb protein EZH2	0.00073634	0.309596	15	125978
O60716	CTND1_HUMAN	CTND1	Catenin delta-1	0.0007356	0.341918	29	176080
P18084	ITB5_HUMAN	ITB5	Integrin beta-5	0.00073418	0.326887	29	147336
P50502	F10A1_HUMAN	F10A1	Hsc70-interacting protein	0.00073325	0.323953	12	125790
Q12906	ILF3_HUMAN	ILF3	Interleukin enhancer-binding factor 3	0.00073288	0.333045	53	177264
P78556	CCL20_HUMAN	CCL20	C-C motif chemokine 20	0.00073228	0.282765	4	115576
P05019	IGF1B_HUMAN	IGF1B	Insulin-like growth factor IB	0.00073226	0.292011	9	104644
P26992	CNTFR_HUMAN	CNTFR	Ciliary neurotrophic factor receptor alpha	0.00072977	0.319532	11	118908
P01019	ANGT_HUMAN	ANGT	Angiotensinogen	0.00072656	0.265762	10	96188
P10827	THA_HUMAN	THA	Thyroid hormone receptor alpha	0.00072634	0.311657	20	129946
Q9NRX3	NUA4L_HUMAN	NUA4L	NADH dehydrogenase [ubiquinone] 1 alpha subcomplex subunit 4-like 2	0.00072622	0.276272	6	90066
P36894	BMR1A_HUMAN	BMR1A	Bone morphogenetic protein receptor type-1A	0.00072564	0.277045	14	128194
P47712	PA24A_HUMAN	PA24A	Cytosolic phospholipase A2	0.00072547	0.310512	14	91756
P14867	GBRA1_HUMAN	GBRA1	Gamma-aminobutyric acid receptor subunit alpha-1	0.00072041	0.282419	16	158466
P29992	GNA11_HUMAN	GNA11	Guanine nucleotide-binding protein subunit alpha-11	0.00071986	0.300442	23	112140
P11233	RALA_HUMAN	RALA	Ras-related protein Ral-A	0.0007177	0.31093	18	126142
O15105	SMAD7_HUMAN	SMAD7	Mothers against decapentaplegic homolog 7	0.00071697	0.319708	28	139520
P31948	STIP1_HUMAN	STIP1	Stress-induced-phosphoprotein 1	0.00071688	0.31366	13	112154
P54646	AAPK2_HUMAN	AAPK2	5'-AMP-activated protein kinase catalytic subunit alpha-2	0.00071594	0.276426	8	102808
P31930	QCR1_HUMAN	QCR1	Cytochrome b-c1 complex subunit 1, mitochondrial	0.00071561	0.277422	8	118024
O95819	M4K4_HUMAN	M4K4	Mitogen-activated protein kinase kinase kinase kinase 4	0.00071449	0.315488	11	102748
Q01968	OCRL_HUMAN	OCRL	Inositol polyphosphate 5-phosphatase OCRL-1	0.00071422	0.310428	7	92076
O14965	STK6_HUMAN	STK6	Serine/threonine-protein kinase 6	0.00071415	0.322116	21	126576
P30990	NEUT_HUMAN	NEUT	Neurotensin/neuromedin NLarge neuromedin N	0.00071309	0.275328	6	140474
P62070	RRAS2_HUMAN	RRAS2	Ras-related protein R-Ras2	0.00071292	0.315516	18	144554
P48039	MTR1A_HUMAN	MTR1A	Melatonin receptor type 1A	0.00071237	0.311181	19	132130
P63208	SKP1_HUMAN	SKP1	S-phase kinase-associated protein 1	0.00071108	0.332438	43	188346
Q9P287	BCCIP_HUMAN	BCCIP	BRCA2 and CDKN1A-interacting protein	0.00071028	0.28488	9	122352
P14784	IL2RB_HUMAN	IL2RB	Interleukin-2 receptor subunit beta	0.00071019	0.336506	26	160622
P22736	NR4A1_HUMAN	NR4A1	Nuclear receptor subfamily 4 group A member 1	0.00071007	0.322626	19	131894
P06733	ENOA_HUMAN	ENOA	Alpha-enolase	0.00070999	0.347368	46	169706
O15350	P73_HUMAN	P73	Tumor protein p73	0.00070886	0.338875	32	166096
P28340	DPOD1_HUMAN	DPOD1	DNA polymerase delta catalytic subunit	0.00069959	0.332885	13	143278
P14921	ETS1_HUMAN	ETS1	Protein C-ets-1	0.00069939	0.332406	30	177688
P02452	CO1A1_HUMAN	CO1A1	Collagen alpha-1(I) chain	0.00069933	0.310512	24	144146
O75674	TM1L1_HUMAN	TM1L1	TOM1-like protein 1	0.000698	0.318445	9	99208
P09326	CD48_HUMAN	CD48	CD48 antigen	0.00069759	0.299766	7	104990
Q8WUM4	PDC6I_HUMAN	PDC6I	Programmed cell death 6-interacting protein	0.00069724	0.324044	19	125950
P04271	S100B_HUMAN	S100B	Protein S100-B	0.00069495	0.301908	13	101282
P37173	TGFR2_HUMAN	TGFR2	TGF-beta receptor type-2	0.00069433	0.328498	27	172642
P04629	NTRK1_HUMAN	NTRK1	High affinity nerve growth factor receptor	0.00069287	0.335236	36	154322
P30154	2AAB_HUMAN	2AAB	Serine/threonine-protein phosphatase 2A 65 kDa regulatory subunit A beta isoform	0.00068923	0.326118	22	136602
P26441	CNTF_HUMAN	CNTF	Ciliary neurotrophic factor	0.0006878	0.293395	11	103446
Q8N2W9	PIAS4_HUMAN	PIAS4	E3 SUMO-protein ligase PIAS4	0.00068528	0.324712	25	123786
Q92734	TFG_HUMAN	TFG	Protein TFG	0.00068031	0.29522	8	102554
Q15109	RAGE_HUMAN	RAGE	Advanced glycosylation end product-specific receptor	0.00067869	0.302938	6	95808
P19419	ELK1_HUMAN	ELK1	ETS domain-containing protein Elk-1	0.00067864	0.333719	29	153374
Q9NRR4	RNC_HUMAN	RNC	Ribonuclease 3	0.00067791	0.307863	8	105736
Q96KQ7	EHMT2_HUMAN	EHMT2	Histone-lysine N-methyltransferase, H3 lysine-9 specific 3	0.00067782	0.314514	15	101542
P40692	MLH1_HUMAN	MLH1	DNA mismatch repair protein Mlh1	0.00067626	0.301593	13	96754
Q13509	TBB3_HUMAN	TBB3	Tubulin beta-3 chain	0.00067564	0.315229	8	94202
O00273	DFFA_HUMAN	DFFA	DNA fragmentation factor subunit alpha	0.00067379	0.306583	11	132070
P62249	RS16_HUMAN	RS16	40S ribosomal protein S16	0.0006721	0.346465	39	218516
Q15746	MYLK_HUMAN	MYLK	Myosin light chain kinase, smooth muscle	0.00067173	0.336964	16	124438
Q15596	NCOA2_HUMAN	NCOA2	Nuclear receptor coactivator 2	0.00067094	0.329937	38	169682
P18509	PACA_HUMAN	PACA	Pituitary adenylate cyclase-activating polypeptidePACAP-related peptide	0.00067084	0.269587	7	180876
Q8NFH8	REPS2_HUMAN	REPS2	RalBP1-associated Eps domain-containing protein 2	0.00066951	0.329843	17	126832
O75888	TNF13_HUMAN	TNF13	Tumor necrosis factor ligand superfamily member 13	0.00066782	0.290834	11	107848
P10451	OSTP_HUMAN	OSTP	Osteopontin	0.00066746	0.315201	19	119478
O14786	NRP1_HUMAN	NRP1	Neuropilin-1	0.00066628	0.271318	13	133852
P46109	CRKL_HUMAN	CRKL	Crk-like protein	0.00066603	0.342256	52	170170
P02458	CO2A1_HUMAN	CO2A1	Collagen alpha-1(II) chain	0.00066584	0.28258	22	105396
Q13287	NMI_HUMAN	NMI	N-myc-interactor	0.00066513	0.307699	16	156252
P21583	SCF_HUMAN	SCF	Kit ligand	0.00066355	0.266231	9	131258
P06729	CD2_HUMAN	CD2	T-cell surface antigen CD2	0.00065838	0.311797	14	114128
P61968	LMO4_HUMAN	LMO4	LIM domain transcription factor LMO4	0.00065782	0.280521	6	95420
P28223	5HT2A_HUMAN	5HT2A	5-hydroxytryptamine receptor 2A	0.00065738	0.28474	8	104178
P10276	RARA_HUMAN	RARA	Retinoic acid receptor alpha	0.00065672	0.329812	34	153922
Q06455	MTG8_HUMAN	MTG8	Protein CBFA2T1	0.00065599	0.306529	17	131256
Q13936	CAC1C_HUMAN	CAC1C	Voltage-dependent L-type calcium channel subunit alpha-1C	0.0006558	0.291593	9	103806
P07359	GP1BA_HUMAN	GP1BA	Platelet glycoprotein Ib alpha chain	0.00065201	0.301724	14	91792
P21730	C5AR_HUMAN	C5AR	C5a anaphylatoxin chemotactic receptor	0.00064869	0.300364	10	112232
P16885	PLCG2_HUMAN	PLCG2	1-phosphatidylinositol-4,5-bisphosphate phosphodiesterase gamma-2	0.00064657	0.345395	43	170128
O94921	PFTK1_HUMAN	PFTK1	Serine/threonine-protein kinase PFTAIRE-1	0.0006452	0.292011	9	115084
P78324	SHPS1_HUMAN	SHPS1	Tyrosine-protein phosphatase non-receptor type substrate 1	0.00064504	0.290932	8	102564
P20338	RAB4A_HUMAN	RAB4A	Ras-related protein Rab-4A	0.00064345	0.317221	15	100240
P20823	HNF1A_HUMAN	HNF1A	Hepatocyte nuclear factor 1-alpha	0.00064294	0.330063	19	121754
P46734	MP2K3_HUMAN	MP2K3	Dual specificity mitogen-activated protein kinase kinase 3	0.00064212	0.296179	12	87268
P50454	SERPH_HUMAN	SERPH	Serpin H1	0.00064049	0.312247	7	92944
P04075	ALDOA_HUMAN	ALDOA	Fructose-bisphosphate aldolase A	0.0006402	0.304348	9	96514
P14373	TRI27_HUMAN	TRI27	Zinc finger protein RFP	0.00064007	0.296053	12	91048
Q04912	RON_HUMAN	RON	Macrophage-stimulating protein receptor	0.00063955	0.339772	18	120178
Q13950	RUNX2_HUMAN	RUNX2	Runt-related transcription factor 2	0.00063816	0.322896	24	156398
O75970	MPDZ_HUMAN	MPDZ	Multiple PDZ domain protein	0.00063816	0.27939	13	92008
P11473	VDR_HUMAN	VDR	Vitamin D3 receptor	0.0006374	0.32365	31	135646
Q8N357	CB018_HUMAN	CB018	Transmembrane protein C2orf18	0.00063479	0.254986	9	89476
P32780	TF2H1_HUMAN	TF2H1	General transcription factor IIH subunit 1	0.00063338	0.317948	16	115994
P50453	SPB9_HUMAN	SPB9	Serpin B9	0.00062925	0.306285	14	108118
O00555	CAC1A_HUMAN	CAC1A	Voltage-dependent P/Q-type calcium channel subunit alpha-1A	0.00062922	0.263819	6	94426
Q15853	USF2_HUMAN	USF2	Upstream stimulatory factor 2	0.00062848	0.304883	15	89250
P05231	IL6_HUMAN	IL6	Interleukin-6	0.00062794	0.27387	8	80970
O43255	SIAH2_HUMAN	SIAH2	E3 ubiquitin-protein ligase SIAH2	0.00062778	0.296483	7	81452
O75928	PIAS2_HUMAN	PIAS2	E3 SUMO-protein ligase PIAS2	0.00062688	0.32978	39	141618
Q9GZX6	IL22_HUMAN	IL22	Interleukin-22	0.00062631	0.213323	5	95266
Q05823	RN5A_HUMAN	RN5A	2-5A-dependent ribonuclease	0.00062615	0.278112	4	81620
P14635	CCNB1_HUMAN	CCNB1	G2/mitotic-specific cyclin-B1	0.00062599	0.315459	29	129142
Q13315	ATM_HUMAN	ATM	Serine-protein kinase ATM	0.00062564	0.320715	31	103620
Q13188	STK3_HUMAN	STK3	Serine/threonine-protein kinase 3	0.00062562	0.289546	9	87560
P52597	HNRPF_HUMAN	HNRPF	Heterogeneous nuclear ribonucleoprotein F	0.00062503	0.345705	46	205380
Q13393	PLD1_HUMAN	PLD1	Phospholipase D1	0.00062477	0.334783	26	131438
Q8IXK0	PHC2_HUMAN	PHC2	Polyhomeotic-like protein 2	0.00062294	0.275087	7	93614
Q9UQF2	JIP1_HUMAN	JIP1	C-jun-amino-terminal kinase-interacting protein 1	0.00062247	0.320982	23	132196
P07947	YES_HUMAN	YES	Proto-oncogene tyrosine-protein kinase Yes	0.00062203	0.339639	32	138022
O95644	NFAC1_HUMAN	NFAC1	Nuclear factor of activated T-cells, cytoplasmic 1	0.00062081	0.318299	10	87860
O15492	RGS16_HUMAN	RGS16	Regulator of G-protein signaling 16	0.0006187	0.319178	12	116002
Q12879	NMDE1_HUMAN	NMDE1	Glutamate [NMDA] receptor subunit epsilon-1	0.00061816	0.322236	19	113456
Q14789	GOGB1_HUMAN	GOGB1	Golgin subfamily B member 1	0.00061792	0.26035	5	96322
Q14573	ITPR3_HUMAN	ITPR3	Inositol 1,4,5-trisphosphate receptor type 3	0.00061775	0.299249	5	89890
Q14257	RCN2_HUMAN	RCN2	Reticulocalbin-2	0.00061767	0.301829	9	149466
P36543	VATE1_HUMAN	VATE1	V-type proton ATPase subunit E 1	0.0006168	0.291495	5	86384
Q92783	STAM1_HUMAN	STAM1	Signal transducing adapter molecule 1	0.00061521	0.290298	9	123688
Q15678	PTN14_HUMAN	PTN14	Tyrosine-protein phosphatase non-receptor type 14	0.000614	0.304615	7	118776
P84243	H33_HUMAN	H33	Histone H3.3	0.00061353	0.311041	18	111740
O75030	MITF_HUMAN	MITF	Microphthalmia-associated transcription factor	0.00061288	0.306827	12	102636
Q16566	KCC4_HUMAN	KCC4	Calcium/calmodulin-dependent protein kinase type IV	0.00061191	0.301672	7	96050
Q13683	ITA7_HUMAN	ITA7	Integrin alpha-7Integrin alpha-7 heavy chainIntegrin alpha-7 light chain	0.00061127	0.276316	6	63668
Q01113	IL9R_HUMAN	IL9R	Interleukin-9 receptor	0.00061123	0.298501	5	92158
P51531	SMCA2_HUMAN	SMCA2	Probable global transcription activator SNF2L2	0.00060992	0.316294	22	134530
P46777	RL5_HUMAN	RL5	60S ribosomal protein L5	0.00060926	0.333494	40	133226
Q14185	DOCK1_HUMAN	DOCK1	Dedicator of cytokinesis protein 1	0.00060883	0.32526	15	94750
P18507	GBRG2_HUMAN	GBRG2	Gamma-aminobutyric acid receptor subunit gamma-2	0.00060839	0.288054	14	131034
Q92973	TNPO1_HUMAN	TNPO1	Transportin-1	0.00060824	0.353103	50	168870
P17661	DESM_HUMAN	DESM	Desmin	0.00060799	0.283111	8	95604
P28347	TEAD1_HUMAN	TEAD1	Transcriptional enhancer factor TEF-1	0.00060719	0.277689	10	108106
P40925	MDHC_HUMAN	MDHC	Malate dehydrogenase, cytoplasmic	0.0006069	0.281387	5	76584
P24394	IL4RA_HUMAN	IL4RA	Interleukin-4 receptor alpha chainSoluble interleukin-4 receptor alpha chain	0.0006058	0.313518	21	133872
Q13464	ROCK1_HUMAN	ROCK1	Rho-associated protein kinase 1	0.0006053	0.325811	24	119728
Q9UEW8	STK39_HUMAN	STK39	STE20/SPS1-related proline-alanine-rich protein kinase	0.00060472	0.286364	9	72696
O14893	GEMI2_HUMAN	GEMI2	Survival of motor neuron protein-interacting protein 1	0.00060392	0.308713	53	148326
P36404	ARL2_HUMAN	ARL2	ADP-ribosylation factor-like protein 2	0.00060088	0.277333	7	83678
O94856	NFASC_HUMAN	NFASC	Neurofascin	0.00060085	0.31366	11	99304
P39019	RS19_HUMAN	RS19	40S ribosomal protein S19	0.00060064	0.346708	49	173900
P52272	HNRPM_HUMAN	HNRPM	Heterogeneous nuclear ribonucleoprotein M	0.00060027	0.332151	22	163214
O95197	RTN3_HUMAN	RTN3	Reticulon-3	0.0005989	0.276779	8	80688
P07766	CD3E_HUMAN	CD3E	T-cell surface glycoprotein CD3 epsilon chain	0.00059654	0.314885	15	102316
P35442	TSP2_HUMAN	TSP2	Thrombospondin-2	0.00059608	0.262779	7	111764
P06127	CD5_HUMAN	CD5	T-cell surface glycoprotein CD5	0.00059558	0.328436	20	108956
P10144	GRAB_HUMAN	GRAB	Granzyme B	0.00059465	0.302673	17	89428
O43612	OREX_HUMAN	OREX	Orexin	0.00059424	0.182234	3	80076
O00144	FZD9_HUMAN	FZD9	Frizzled-9	0.00059387	0.18232	3	115240
Q53G59	KLH12_HUMAN	KLH12	Kelch-like protein 12	0.00059344	0.263799	8	73784
Q00169	PIPNA_HUMAN	PIPNA	Phosphatidylinositol transfer protein alpha isoform	0.00059306	0.29585	4	81158
P61160	ARP2_HUMAN	ARP2	Actin-related protein 2	0.00059263	0.326609	21	104116
P02786	TFR1_HUMAN	TFR1	Transferrin receptor protein 1	0.00059256	0.318386	13	114824
Q9UI08	EVL_HUMAN	EVL	Ena/VASP-like protein	0.00058935	0.313263	11	94000
P61764	STXB1_HUMAN	STXB1	Syntaxin-binding protein 1	0.00058925	0.306502	13	111984
P16435	NCPR_HUMAN	NCPR	NADPH--cytochrome P450 reductase	0.00058917	0.244824	3	72596
P32241	VIPR1_HUMAN	VIPR1	Vasoactive intestinal polypeptide receptor 1	0.00058901	0.289837	10	106420
P09917	LOX5_HUMAN	LOX5	Arachidonate 5-lipoxygenase	0.00058896	0.306583	4	80182
P18428	LBP_HUMAN	LBP	Lipopolysaccharide-binding protein	0.00058734	0.232769	3	73778
Q16621	NFE2_HUMAN	NFE2	Transcription factor NF-E2 45 kDa subunit	0.00058733	0.276934	7	104126
O75558	STX11_HUMAN	STX11	Syntaxin-11	0.00058728	0.238867	6	79862
P26842	CD27_HUMAN	CD27	CD27 antigen	0.00058619	0.277156	6	117718
P19105	MRLC3_HUMAN	MRLC3	Myosin regulatory light chain MRLC3	0.0005857	0.359142	52	278234
O15444	CCL25_HUMAN	CCL25	C-C motif chemokine 25	0.00058179	0.237069	4	93460
Q9UQL6	HDAC5_HUMAN	HDAC5	Histone deacetylase 5	0.00058174	0.315833	27	134400
P50391	NPY4R_HUMAN	NPY4R	Neuropeptide Y receptor type 4	0.00058122	0.181025	3	90098
P35221	CTNA1_HUMAN	CTNA1	Catenin alpha-1	0.00057977	0.325658	25	117870
Q9HBE5	IL21R_HUMAN	IL21R	Interleukin-21 receptor	0.0005796	0.264989	3	85270
P12319	FCERA_HUMAN	FCERA	High affinity immunoglobulin epsilon receptor subunit alpha	0.00057922	0.266497	6	98484
P05089	ARGI1_HUMAN	ARGI1	Arginase-1	0.00057873	0.250579	3	61952
P40238	TPOR_HUMAN	TPOR	Thrombopoietin receptor	0.00057747	0.291128	6	97120
Q9Y275	TN13B_HUMAN	TN13B	Tumor necrosis factor ligand superfamily member 13B	0.0005773	0.233554	6	106412
Q9Y5U5	TNR18_HUMAN	TNR18	Tumor necrosis factor receptor superfamily member 18	0.00057727	0.268376	6	139862
P16422	TACD1_HUMAN	TACD1	Tumor-associated calcium signal transducer 1	0.0005772	0.257755	4	111534
Q9NRF9	DPOE3_HUMAN	DPOE3	DNA polymerase epsilon subunit 3	0.0005772	0.214365	2	91846
P30450	1A26_HUMAN	1A26	HLA class I histocompatibility antigen, A-26 alpha chain	0.0005772	0.158909	2	66222
O15130	NPFF_HUMAN	NPFF	FMRFamide-related peptidesNeuropeptide SFNeuropeptide FFNeuropeptide AF	0.0005772	0.181053	3	83018
Q93096	TP4A1_HUMAN	TP4A1	Protein tyrosine phosphatase type IVA 1	0.0005772	0.260291	4	73270
P49683	PRLHR_HUMAN	PRLHR	Prolactin-releasing peptide receptor	0.0005772	0.23255	4	111122
P56705	WNT4_HUMAN	WNT4	Protein Wnt-4	0.0005772	0.174638	2	79482
Q15042	RB3GP_HUMAN	RB3GP	Rab3 GTPase-activating protein catalytic subunit	0.0005772	0.237981	2	93036
P09914	IFIT1_HUMAN	IFIT1	Interferon-induced protein with tetratricopeptide repeats 1	0.0005772	0.259531	2	93088
Q9NVU0	RPC5_HUMAN	RPC5	DNA-directed RNA polymerase III subunit RPC5	0.0005772	0.193424	2	73872
O43193	MTLR_HUMAN	MTLR	Motilin receptor	0.0005772	0.188213	3	66702
Q969Y2	GTPB3_HUMAN	GTPB3	tRNA modification GTPase GTPBP3, mitochondrial	0.0005772	0.236035	4	71078
P48546	GIPR_HUMAN	GIPR	Gastric inhibitory polypeptide receptor	0.0005772	0.196897	2	70446
Q92600	RCD1_HUMAN	RCD1	Cell differentiation protein RCD1 homolog	0.0005772	0.269734	2	103780
Q9UKX2	MYH2_HUMAN	MYH2	Myosin-2	0.0005772	0.255493	2	77934
P51810	GP143_HUMAN	GP143	G-protein coupled receptor 143	0.0005772	0.240625	2	82566
P46094	XCR1_HUMAN	XCR1	Chemokine XC receptor 1	0.0005772	0.178296	4	83832
Q9BUI4	RPC3_HUMAN	RPC3	DNA-directed RNA polymerase III subunit RPC3	0.0005772	0.248103	3	117508
P20036	HA2Q_HUMAN	HA2Q	HLA class II histocompatibility antigen, DP alpha chain	0.0005772	0.260331	2	106296
Q86V24	ADR2_HUMAN	ADR2	Adiponectin receptor protein 2	0.0005772	0.227407	2	67134
Q9P0L1	ZN167_HUMAN	ZN167	Zinc finger protein 167	0.0005772	0.212629	2	98690
P59665	DEF1_HUMAN	DEF1	Neutrophil defensin 1	0.0005772	0.187907	2	69810
Q16718	NDUA5_HUMAN	NDUA5	NADH dehydrogenase [ubiquinone] 1 alpha subcomplex subunit 5	0.0005772	0.268646	2	111244
P04155	TFF1_HUMAN	TFF1	Trefoil factor 1	0.0005772	0.202442	4	79370
P30968	GNRHR_HUMAN	GNRHR	Gonadotropin-releasing hormone receptor	0.0005772	0.223779	4	92132
Q02643	GHRHR_HUMAN	GHRHR	Growth hormone-releasing hormone receptor	0.0005772	0.188213	3	66702
P51812	KS6A3_HUMAN	KS6A3	Ribosomal protein S6 kinase alpha-3	0.00057665	0.321399	22	110530
P17787	ACHB2_HUMAN	ACHB2	Neuronal acetylcholine receptor subunit beta-2	0.00057662	0.215044	3	95876
P41743	KPCI_HUMAN	KPCI	Protein kinase C iota type	0.00057609	0.335821	35	132532
P29074	PTN4_HUMAN	PTN4	Tyrosine-protein phosphatase non-receptor type 4	0.00057564	0.32735	12	87326
P19525	E2AK2_HUMAN	E2AK2	Interferon-induced, double-stranded RNA-activated protein kinase	0.00057541	0.338115	31	147522
P07858	CATB_HUMAN	CATB	Cathepsin B	0.00057462	0.289136	17	87080
O43493	TGON2_HUMAN	TGON2	Trans-Golgi network integral membrane protein 2	0.0005738	0.325077	14	100752
P98095	FBLN2_HUMAN	FBLN2	Fibulin-2	0.00057335	0.277867	17	71104
P80098	CCL7_HUMAN	CCL7	C-C motif chemokine 7	0.00057248	0.271616	17	115792
O15399	NMDE4_HUMAN	NMDE4	Glutamate [NMDA] receptor subunit epsilon-4	0.00056488	0.321012	23	132328
P51149	RAB7A_HUMAN	RAB7A	Ras-related protein Rab-7a	0.00056437	0.305448	15	109530
O95602	RPA1_HUMAN	RPA1	DNA-directed RNA polymerase I subunit RPA1	0.00056336	0.326517	59	177088
P30460	1B08_HUMAN	1B08	HLA class I histocompatibility antigen, B-8 alpha chain	0.00056307	0.230309	3	104452
P17096	HMGA1_HUMAN	HMGA1	High mobility group protein HMG-I/HMG-Y	0.00056209	0.311601	21	108486
P01375	TNFA_HUMAN	TNFA	Tumor necrosis factor	0.00056069	0.298295	19	89374
P41221	WNT5A_HUMAN	WNT5A	Protein Wnt-5a	0.00056	0.174612	2	76648
O95257	GA45G_HUMAN	GA45G	Growth arrest and DNA-damage-inducible protein GADD45 gamma	0.00055796	0.31566	21	97120
P50570	DYN2_HUMAN	DYN2	Dynamin-2	0.00055528	0.333719	20	119144
P19429	TNNI3_HUMAN	TNNI3	Troponin I, cardiac muscle	0.00055519	0.288943	9	93024
P14317	HCLS1_HUMAN	HCLS1	Hematopoietic lineage cell-specific protein	0.00055333	0.314714	13	105312
O14641	DVL2_HUMAN	DVL2	Segment polarity protein dishevelled homolog DVL-2	0.00055254	0.338049	22	140660
Q9NZI8	IF2B1_HUMAN	IF2B1	Insulin-like growth factor 2 mRNA-binding protein 1	0.00055142	0.327195	59	164724
P35251	RFC1_HUMAN	RFC1	Replication factor C subunit 1	0.00055118	0.319915	22	110242
O14640	DVL1_HUMAN	DVL1	Segment polarity protein dishevelled homolog DVL-1	0.00054866	0.321996	19	95948
Q969E3	UCN3_HUMAN	UCN3	Urocortin-3	0.0005484	0.219262	3	148122
Q99665	I12R2_HUMAN	I12R2	Interleukin-12 receptor beta-2 chain	0.00054757	0.270894	7	94550
O75688	PPM1B_HUMAN	PPM1B	Protein phosphatase 1B	0.00054715	0.321131	19	112124
Q13111	CAF1A_HUMAN	CAF1A	Chromatin assembly factor 1 subunit A	0.00054593	0.320388	19	101126
P30086	PEBP1_HUMAN	PEBP1	Phosphatidylethanolamine-binding protein 1	0.00054574	0.33644	22	152636
P07942	LAMB1_HUMAN	LAMB1	Laminin subunit beta-1	0.00054425	0.270007	11	100584
O60343	TBCD4_HUMAN	TBCD4	TBC1 domain family member 4	0.00053829	0.291152	3	109336
P16410	CTLA4_HUMAN	CTLA4	Cytotoxic T-lymphocyte protein 4	0.00053817	0.31093	13	131352
Q14247	SRC8_HUMAN	SRC8	Src substrate cortactin	0.00053607	0.334137	26	108072
Q92731	ESR2_HUMAN	ESR2	Estrogen receptor beta	0.00053385	0.336866	26	129158
P49137	MAPK2_HUMAN	MAPK2	MAP kinase-activated protein kinase 2	0.00053372	0.321787	20	88342
P41279	M3K8_HUMAN	M3K8	Mitogen-activated protein kinase kinase kinase 8	0.00053316	0.33828	39	147490
P08123	CO1A2_HUMAN	CO1A2	Collagen alpha-2(I) chain	0.00053074	0.297783	13	137246
P21453	S1PR1_HUMAN	S1PR1	Sphingosine 1-phosphate receptor 1	0.0005301	0.299481	7	115990
P25391	LAMA1_HUMAN	LAMA1	Laminin subunit alpha-1	0.00052976	0.291079	17	89922
P23634	AT2B4_HUMAN	AT2B4	Plasma membrane calcium-transporting ATPase 4	0.00052631	0.298552	8	69946
P08621	RU17_HUMAN	RU17	U1 small nuclear ribonucleoprotein 70 kDa	0.00052289	0.302198	17	86592
P23528	COF1_HUMAN	COF1	Cofilin-1	0.00052165	0.334783	19	110886
Q9UBK2	PRGC1_HUMAN	PRGC1	Peroxisome proliferator-activated receptor gamma coactivator 1-alpha	0.00052152	0.315746	21	101486
P03956	MMP1_HUMAN	MMP1	Interstitial collagenase	0.00052033	0.277666	15	90284
Q96B97	SH3K1_HUMAN	SH3K1	SH3 domain-containing kinase-binding protein 1	0.00051972	0.33104	31	108238
P35225	IL13_HUMAN	IL13	Interleukin-13	0.00051907	0.281845	5	87776
Q12846	STX4_HUMAN	STX4	Syntaxin-4	0.00051759	0.28258	10	75572
P22695	QCR2_HUMAN	QCR2	Cytochrome b-c1 complex subunit 2, mitochondrial	0.00051756	0.271488	7	86332
P02649	APOE_HUMAN	APOE	Apolipoprotein E	0.00051667	0.293793	13	92014
P26010	ITB7_HUMAN	ITB7	Integrin beta-7	0.00051588	0.316034	19	101062
P61278	SMS_HUMAN	SMS	Somatostatin	0.00051346	0.237134	5	109334
Q5TD97	FHL5_HUMAN	FHL5	Four and a half LIM domains protein 5	0.00051018	0.286814	9	65280
P28749	RBL1_HUMAN	RBL1	Retinoblastoma-like protein 1	0.00050789	0.325811	30	122048
P36578	RL4_HUMAN	RL4	60S ribosomal protein L4	0.00050595	0.34229	64	223184
P20273	CD22_HUMAN	CD22	B-cell receptor CD22	0.00050512	0.320388	15	78948
P45973	CBX5_HUMAN	CBX5	Chromobox protein homolog 5	0.00050207	0.297655	22	100258
Q04637	IF4G1_HUMAN	IF4G1	Eukaryotic translation initiation factor 4 gamma 1	0.00050081	0.317221	23	104416
P16471	PRLR_HUMAN	PRLR	Prolactin receptor	0.00049931	0.311909	16	97802
Q05639	EF1A2_HUMAN	EF1A2	Elongation factor 1-alpha 2	0.00049498	0.338082	41	158784
P20916	MAG_HUMAN	MAG	Myelin-associated glycoprotein	0.00049429	0.296839	10	86248
P07288	KLK3_HUMAN	KLK3	Prostate-specific antigen	0.00049314	0.319267	12	87340
Q9UHF0	TKNK_HUMAN	TKNK	Tachykinin-3	0.00049162	0.241615	5	79624
Q14765	STAT4_HUMAN	STAT4	Signal transducer and activator of transcription 4	0.00049037	0.290104	11	81568
Q9Y6I3	EPN1_HUMAN	EPN1	Epsin-1	0.00048959	0.294468	10	76636
Q99963	SH3G3_HUMAN	SH3G3	Endophilin-A3	0.00048873	0.30811	18	78170
P35462	DRD3_HUMAN	DRD3	D(3) dopamine receptor	0.00048833	0.311909	7	91884
P56817	BACE1_HUMAN	BACE1	Beta-secretase 1	0.00048784	0.300052	14	58038
P26006	ITA3_HUMAN	ITA3	Integrin alpha-3	0.00048635	0.296813	20	88756
O00213	APBB1_HUMAN	APBB1	Amyloid beta A4 precursor protein-binding family B member 1	0.00048608	0.317511	17	96206
Q03060	CREM_HUMAN	CREM	cAMP-responsive element modulator	0.00048588	0.322416	23	97320
P41143	OPRD_HUMAN	OPRD	Delta-type opioid receptor	0.00048566	0.312331	15	112918
P15813	CD1D_HUMAN	CD1D	T-cell surface glycoprotein CD1d	0.00048566	0.277178	7	84300
P41235	HNF4A_HUMAN	HNF4A	Hepatocyte nuclear factor 4-alpha	0.00048553	0.322086	19	88896
Q99816	TS101_HUMAN	TS101	Tumor susceptibility gene 101 protein	0.00048424	0.316381	21	89946
Q06413	MEF2C_HUMAN	MEF2C	Myocyte-specific enhancer factor 2C	0.00048271	0.311769	19	89864
P30411	BKRB2_HUMAN	BKRB2	B2 bradykinin receptor	0.00048202	0.296306	12	73906
P22301	IL10_HUMAN	IL10	Interleukin-10	0.00048059	0.234867	5	65348
P05362	ICAM1_HUMAN	ICAM1	Intercellular adhesion molecule 1	0.00048009	0.302832	14	85142
P35368	ADA1B_HUMAN	ADA1B	Alpha-1B adrenergic receptor	0.00047993	0.311293	10	72524
P10147	CCL3_HUMAN	CCL3	C-C motif chemokine 3	0.00047745	0.27647	11	85814
P07332	FES_HUMAN	FES	Proto-oncogene tyrosine-protein kinase Fes/Fps	0.00047498	0.328592	21	91498
P45985	MP2K4_HUMAN	MP2K4	Dual specificity mitogen-activated protein kinase kinase 4	0.00047454	0.316438	27	112838
Q16512	PKN1_HUMAN	PKN1	Serine/threonine-protein kinase N1	0.00047318	0.317133	21	81104
Q16795	NDUA9_HUMAN	NDUA9	NADH dehydrogenase [ubiquinone] 1 alpha subcomplex subunit 9, mitochondrial	0.00047284	0.264686	8	102930
Q13535	ATR_HUMAN	ATR	Serine/threonine-protein kinase ATR	0.00047058	0.324742	27	101332
P50052	AGTR2_HUMAN	AGTR2	Type-2 angiotensin II receptor	0.00047054	0.292479	8	65276
Q08881	ITK_HUMAN	ITK	Tyrosine-protein kinase ITK/TSK	0.00046797	0.339973	29	127144
P51636	CAV2_HUMAN	CAV2	Caveolin-2	0.00046772	0.315143	9	70528
P43220	GLP1R_HUMAN	GLP1R	Glucagon-like peptide 1 receptor	0.00046699	0.287552	3	64514
O15169	AXN1_HUMAN	AXN1	Axin-1	0.0004655	0.327041	30	96702
P62888	RL30_HUMAN	RL30	60S ribosomal protein L30	0.0004654	0.346327	46	178364
P24666	PPAC_HUMAN	PPAC	Low molecular weight phosphotyrosine protein phosphatase	0.00046439	0.324925	18	95572
Q13480	GAB1_HUMAN	GAB1	GRB2-associated-binding protein 1	0.00046315	0.340541	30	111406
P42702	LIFR_HUMAN	LIFR	Leukemia inhibitory factor receptor	0.00046307	0.304615	11	87224
P47870	GBRB2_HUMAN	GBRB2	Gamma-aminobutyric acid receptor subunit beta-2	0.00046265	0.273287	15	105646
Q92743	HTRA1_HUMAN	HTRA1	Serine protease HTRA1	0.00046218	0.29863	6	46950
P05023	AT1A1_HUMAN	AT1A1	Sodium/potassium-transporting ATPase subunit alpha-1	0.00046106	0.335009	24	125238
P55884	EIF3B_HUMAN	EIF3B	Eukaryotic translation initiation factor 3 subunit B	0.00045642	0.33944	52	98528
O75056	SDC3_HUMAN	SDC3	Syndecan-3	0.00045522	0.318621	18	90182
O60880	SH21A_HUMAN	SH21A	SH2 domain-containing protein 1A	0.00045428	0.324803	17	106152
O75955	FLOT1_HUMAN	FLOT1	Flotillin-1	0.00045333	0.305125	6	48124
Q9BZL6	KPCD2_HUMAN	KPCD2	Serine/threonine-protein kinase D2	0.00045096	0.294994	18	76366
P41597	CCR2_HUMAN	CCR2	C-C chemokine receptor type 2	0.00044974	0.295271	12	122280
Q13490	BIRC2_HUMAN	BIRC2	Baculoviral IAP repeat-containing protein 2	0.00044707	0.304134	17	142426
P15036	ETS2_HUMAN	ETS2	Protein C-ets-2	0.00044705	0.314514	15	84046
Q9UPT6	JIP3_HUMAN	JIP3	C-jun-amino-terminal kinase-interacting protein 3	0.00044608	0.32116	24	98680
Q9UQC2	GAB2_HUMAN	GAB2	GRB2-associated-binding protein 2	0.00044413	0.341986	28	114678
Q16620	NTRK2_HUMAN	NTRK2	BDNF/NT-3 growth factors receptor	0.00044397	0.312472	21	89042
P55212	CASP6_HUMAN	CASP6	Caspase-6	0.00044227	0.323983	27	103580
P28908	TNR8_HUMAN	TNR8	Tumor necrosis factor receptor superfamily member 8	0.00044145	0.28325	9	68960
P23246	SFPQ_HUMAN	SFPQ	Splicing factor, proline- and glutamine-rich	0.0004403	0.327877	28	107326
P06576	ATPB_HUMAN	ATPB	ATP synthase subunit beta, mitochondrial	0.00043842	0.324712	10	85138
P49715	CEBPA_HUMAN	CEBPA	CCAAT/enhancer-binding protein alpha	0.00043822	0.326517	32	117026
P13671	CO6_HUMAN	CO6	Complement component C6	0.00043767	0.312528	6	77610
P36896	ACV1B_HUMAN	ACV1B	Activin receptor type-1B	0.00043626	0.283644	14	86346
P35268	RL22_HUMAN	RL22	60S ribosomal protein L22	0.00043538	0.347752	47	149314
O14836	TR13B_HUMAN	TR13B	Tumor necrosis factor receptor superfamily member 13B	0.00043079	0.285162	6	79696
Q96S59	RANB9_HUMAN	RANB9	Ran-binding protein 9	0.00043007	0.323228	20	86062
P17275	JUNB_HUMAN	JUNB	Transcription factor jun-B	0.00042827	0.31383	20	102770
Q92945	FUBP2_HUMAN	FUBP2	Far upstream element-binding protein 2	0.00042743	0.320092	10	60896
Q9UQB8	BAIP2_HUMAN	BAIP2	Brain-specific angiogenesis inhibitor 1-associated protein 2	0.00042655	0.296002	11	67474
Q13489	BIRC3_HUMAN	BIRC3	Baculoviral IAP repeat-containing protein 3	0.00042489	0.305394	18	147766
P25705	ATPA_HUMAN	ATPA	ATP synthase subunit alpha, mitochondrial	0.00042259	0.361616	52	220354
P30305	MPIP2_HUMAN	MPIP2	M-phase inducer phosphatase 2	0.00042103	0.329717	18	93432
Q02246	CNTN2_HUMAN	CNTN2	Contactin-2	0.00041847	0.270281	5	57948
P34903	GBRA3_HUMAN	GBRA3	Gamma-aminobutyric acid receptor subunit alpha-3	0.00041796	0.283366	8	62214
P24864	CCNE1_HUMAN	CCNE1	G1/S-specific cyclin-E1	0.00041673	0.319002	31	88900
P26583	HMGB2_HUMAN	HMGB2	High mobility group protein B2	0.00041399	0.312303	13	70798
P30304	MPIP1_HUMAN	MPIP1	M-phase inducer phosphatase 1	0.0004113	0.331579	20	91382
P55957	BID_HUMAN	BID	BH3-interacting domain death agonist	0.00041047	0.323258	29	87696
P50613	CDK7_HUMAN	CDK7	Cell division protein kinase 7	0.00041039	0.32027	24	87142
P20023	CR2_HUMAN	CR2	Complement receptor type 2	0.00040847	0.294768	10	50484
P14598	NCF1_HUMAN	NCF1	Neutrophil cytosol factor 1	0.00040745	0.328529	20	85850
P10398	ARAF_HUMAN	ARAF	A-Raf proto-oncogene serine/threonine-protein kinase	0.00040739	0.31079	15	62316
P07339	CATD_HUMAN	CATD	Cathepsin DCathepsin D light chainCathepsin D heavy chain	0.0004064	0.295598	11	51980
Q9UDY2	ZO2_HUMAN	ZO2	Tight junction protein ZO-2	0.00040629	0.316381	12	73264
P25685	DNJB1_HUMAN	DNJB1	DnaJ homolog subfamily B member 1	0.00040626	0.301908	8	58066
Q14155	ARHG7_HUMAN	ARHG7	Rho guanine nucleotide exchange factor 7	0.00040537	0.322776	21	84030
P52565	GDIR1_HUMAN	GDIR1	Rho GDP-dissociation inhibitor 1	0.00040522	0.322266	28	86696
P10114	RAP2A_HUMAN	RAP2A	Ras-related protein Rap-2a	0.00040454	0.299896	17	76252
P45452	MMP13_HUMAN	MMP13	Collagenase 3	0.00040303	0.264262	8	64902
P20700	LMNB1_HUMAN	LMNB1	Lamin-B1	0.00040192	0.323832	20	79724
O95622	ADCY5_HUMAN	ADCY5	Adenylate cyclase type 5	0.00040156	0.300912	9	73316
P62942	FKB1A_HUMAN	FKB1A	Peptidyl-prolyl cis-trans isomerase FKBP1A	0.00040127	0.293296	11	51694
P16671	CD36_HUMAN	CD36	Platelet glycoprotein 4	0.00039826	0.315718	18	100526
Q8WZ42	TITIN_HUMAN	TITIN	Titin	0.00039805	0.312303	15	62348
P25116	PAR1_HUMAN	PAR1	Proteinase-activated receptor 1	0.00039796	0.294193	12	59850
Q16625	OCLN_HUMAN	OCLN	Occludin	0.00039629	0.310261	14	62566
P43246	MSH2_HUMAN	MSH2	DNA mismatch repair protein Msh2	0.00039585	0.318621	23	79970
P16871	IL7RA_HUMAN	IL7RA	Interleukin-7 receptor subunit alpha	0.0003936	0.31079	13	73908
P12643	BMP2_HUMAN	BMP2	Bone morphogenetic protein 2	0.00039249	0.273114	13	71408
Q15831	STK11_HUMAN	STK11	Serine/threonine-protein kinase 11	0.00039197	0.322056	17	71280
Q9UNH7	SNX6_HUMAN	SNX6	Sorting nexin-6	0.00039122	0.30699	15	72756
Q9ULZ3	ASC_HUMAN	ASC	Apoptosis-associated speck-like protein containing a CARD	0.00038959	0.28258	12	59874
P78536	ADA17_HUMAN	ADA17	ADAM 17	0.00038943	0.308906	13	61164
P51114	FXR1_HUMAN	FXR1	Fragile X mental retardation syndrome-related protein 1	0.00038808	0.306691	32	97746
Q14134	TRI29_HUMAN	TRI29	Tripartite motif-containing protein 29	0.00038613	0.319945	12	64042
O00221	IKBE_HUMAN	IKBE	NF-kappa-B inhibitor epsilon	0.00038527	0.329623	36	104534
Q9UHI6	DDX20_HUMAN	DDX20	Probable ATP-dependent RNA helicase DDX20	0.00038401	0.303814	17	64112
P15918	RAG1_HUMAN	RAG1	V(D)J recombination-activating protein 1	0.00038361	0.294668	7	65106
P18847	ATF3_HUMAN	ATF3	Cyclic AMP-dependent transcription factor ATF-3	0.00038264	0.309403	16	71370
P18848	ATF4_HUMAN	ATF4	Cyclic AMP-dependent transcription factor ATF-4	0.00038143	0.299844	23	69540
P13500	CCL2_HUMAN	CCL2	C-C motif chemokine 2	0.00038075	0.26252	14	87320
P17542	TAL1_HUMAN	TAL1	T-cell acute lymphocytic leukemia protein 1	0.00038066	0.313065	19	83114
Q9H0H5	RGAP1_HUMAN	RGAP1	Rac GTPase-activating protein 1	0.0003787	0.322386	15	65598
P10599	THIO_HUMAN	THIO	Thioredoxin	0.00037794	0.33063	14	83922
Q99828	CIB1_HUMAN	CIB1	Calcium and integrin-binding protein 1	0.00037794	0.297706	13	57800
P17301	ITA2_HUMAN	ITA2	Integrin alpha-2	0.00037718	0.303335	17	60716
P35240	MERL_HUMAN	MERL	Merlin	0.00037059	0.324195	19	72484
O14818	PSA7_HUMAN	PSA7	Proteasome subunit alpha type-7	0.0003705	0.314286	18	77210
P23284	PPIB_HUMAN	PPIB	Peptidyl-prolyl cis-trans isomerase B	0.00037024	0.304937	11	76824
Q03431	PTHR1_HUMAN	PTHR1	Parathyroid hormone/parathyroid hormone-related peptide receptor	0.00037012	0.294293	7	60210
P42226	STAT6_HUMAN	STAT6	Signal transducer and activator of transcription 6	0.000368	0.324529	19	89550
P43243	MATR3_HUMAN	MATR3	Matrin-3	0.00036773	0.337161	55	147246
P27695	APEX1_HUMAN	APEX1	DNA-(apurinic or apyrimidinic site) lyase	0.00036758	0.326733	21	100154
P17535	JUND_HUMAN	JUND	Transcription factor jun-D	0.00036621	0.320596	22	118534
P01031	CO5_HUMAN	CO5	Complement C5	0.000366	0.254929	9	55004
Q14242	SELPL_HUMAN	SELPL	P-selectin glycoprotein ligand 1	0.00036517	0.28474	11	44220
P13747	HLAE_HUMAN	HLAE	HLA class I histocompatibility antigen, alpha chain E	0.00036429	0.27045	14	64104
P16035	TIMP2_HUMAN	TIMP2	Metalloproteinase inhibitor 2	0.00036276	0.273913	8	54008
P46783	RS10_HUMAN	RS10	40S ribosomal protein S10	0.00036245	0.345016	48	125072
P30291	WEE1_HUMAN	WEE1	Wee1-like protein kinase	0.00036212	0.334072	18	87826
O14654	IRS4_HUMAN	IRS4	Insulin receptor substrate 4	0.00036205	0.342798	19	115872
Q13905	RPGF1_HUMAN	RPGF1	Rap guanine nucleotide exchange factor 1	0.00036197	0.336147	27	92180
Q14103	HNRPD_HUMAN	HNRPD	Heterogeneous nuclear ribonucleoprotein D0	0.00036133	0.346327	51	112382
P10145	IL8_HUMAN	IL8	Interleukin-8	0.00035958	0.281387	11	56088
P12270	TPR_HUMAN	TPR	Nucleoprotein TPR	0.00035671	0.315516	6	46200
Q15052	ARHG6_HUMAN	ARHG6	Rho guanine nucleotide exchange factor 6	0.00035574	0.320211	18	78660
Q13627	DYR1A_HUMAN	DYR1A	Dual specificity tyrosine-phosphorylation-regulated kinase 1A	0.00035537	0.295321	9	57198
Q9NYJ8	TAB2_HUMAN	TAB2	Mitogen-activated protein kinase kinase kinase 7-interacting protein 2	0.00035476	0.337653	33	115088
Q07869	PPARA_HUMAN	PPARA	Peroxisome proliferator-activated receptor alpha	0.00035285	0.328218	22	91598
P18505	GBRB1_HUMAN	GBRB1	Gamma-aminobutyric acid receptor subunit beta-1	0.00035247	0.27277	9	60544
Q9UMX1	SUFU_HUMAN	SUFU	Suppressor of fused homolog	0.00035046	0.287719	13	61468
P24530	EDNRB_HUMAN	EDNRB	Endothelin B receptor	0.00034927	0.286316	8	46194
P62979	RS27A_HUMAN	RS27A	40S ribosomal protein S27a	0.0003457	0.315804	15	75108
O15519	CFLAR_HUMAN	CFLAR	CASP8 and FADD-like apoptosis regulator	0.00034557	0.320982	31	87806
P11215	ITAM_HUMAN	ITAM	Integrin alpha-M	0.00034304	0.284553	15	43784
P62837	UB2D2_HUMAN	UB2D2	Ubiquitin-conjugating enzyme E2 D2	0.00033952	0.315545	17	58490
P42262	GRIA2_HUMAN	GRIA2	Glutamate receptor 2	0.00033842	0.296306	12	51376
O14512	SOCS7_HUMAN	SOCS7	Suppressor of cytokine signaling 7	0.00033795	0.312359	8	63704
P25024	CXCR1_HUMAN	CXCR1	High affinity interleukin-8 receptor A	0.00033702	0.272684	14	61926
Q92997	DVL3_HUMAN	DVL3	Segment polarity protein dishevelled homolog DVL-3	0.00033694	0.305744	14	47306
P50150	GBG4_HUMAN	GBG4	Guanine nucleotide-binding protein G(I)/G(S)/G(O) subunit gamma-4	0.0003367	0.281204	17	106884
Q9HCU9	BRMS1_HUMAN	BRMS1	Breast cancer metastasis-suppressor 1	0.00033579	0.308411	11	67326
Q13309	SKP2_HUMAN	SKP2	S-phase kinase-associated protein 2	0.0003351	0.305529	26	67918
P48357	LEPR_HUMAN	LEPR	Leptin receptor	0.00033364	0.315115	11	41512
Q16584	M3K11_HUMAN	M3K11	Mitogen-activated protein kinase kinase kinase 11	0.00032971	0.305018	19	79354
Q92851	CASPA_HUMAN	CASPA	Caspase-10	0.00032963	0.318767	28	75406
Q00526	CDK3_HUMAN	CDK3	Cell division protein kinase 3	0.00032933	0.29285	14	50076
P51679	CCR4_HUMAN	CCR4	C-C chemokine receptor type 4	0.00032921	0.266334	7	55952
O00487	PSDE_HUMAN	PSDE	26S proteasome non-ATPase regulatory subunit 14	0.00032911	0.288294	5	53856
P32004	L1CAM_HUMAN	L1CAM	Neural cell adhesion molecule L1	0.00032876	0.305259	16	52562
P63151	2ABA_HUMAN	2ABA	Serine/threonine-protein phosphatase 2A 55 kDa regulatory subunit B alpha isoform	0.00032823	0.305529	14	58164
P51813	BMX_HUMAN	BMX	Cytoplasmic tyrosine-protein kinase BMX	0.00032805	0.337719	20	96478
Q13257	MD2L1_HUMAN	MD2L1	Mitotic spindle assembly checkpoint protein MAD2A	0.000328	0.304268	16	52214
Q99704	DOK1_HUMAN	DOK1	Docking protein 1	0.00032715	0.332629	35	102556
P04229	2B11_HUMAN	2B11	HLA class II histocompatibility antigen, DRB1-1 beta chain	0.00032628	0.201841	3	154808
Q02763	TIE2_HUMAN	TIE2	Angiopoietin-1 receptor	0.00032618	0.312331	13	55408
Q03518	TAP1_HUMAN	TAP1	Antigen peptide transporter 1	0.00032597	0.294568	10	67068
O14974	MYPT1_HUMAN	MYPT1	Protein phosphatase 1 regulatory subunit 12A	0.00032447	0.329216	13	75468
Q9Y6R4	M3K4_HUMAN	M3K4	Mitogen-activated protein kinase kinase kinase 4	0.00032436	0.313376	20	61570
Q15149	PLEC1_HUMAN	PLEC1	Plectin-1	0.00032429	0.338181	18	89612
P48788	TNNI2_HUMAN	TNNI2	Troponin I, fast skeletal muscle	0.00032391	0.27374	3	48280
Q9UKB1	FBW1B_HUMAN	FBW1B	F-box/WD repeat-containing protein 11	0.00032373	0.315833	28	64536
O95721	SNP29_HUMAN	SNP29	Synaptosomal-associated protein 29	0.00032229	0.27333	7	45476
P61158	ARP3_HUMAN	ARP3	Actin-related protein 3	0.0003205	0.327195	20	66800
P08571	CD14_HUMAN	CD14	Monocyte differentiation antigen CD14	0.00031923	0.265986	7	42974
P04181	OAT_HUMAN	OAT	Ornithine aminotransferase, mitochondrial	0.00031866	0.292208	11	67688
P29279	CTGF_HUMAN	CTGF	Connective tissue growth factor	0.00031862	0.306556	11	56442
P43146	DCC_HUMAN	DCC	Netrin receptor DCC	0.00031822	0.318094	12	53404
Q14152	EIF3A_HUMAN	EIF3A	Eukaryotic translation initiation factor 3 subunit A	0.00031796	0.311545	18	57600
P42575	CASP2_HUMAN	CASP2	Caspase-2	0.00031703	0.304964	18	61728
P53778	MK12_HUMAN	MK12	Mitogen-activated protein kinase 12	0.00031661	0.313319	14	55082
P53667	LIMK1_HUMAN	LIMK1	LIM domain kinase 1	0.00031636	0.313235	18	57560
Q16363	LAMA4_HUMAN	LAMA4	Laminin subunit alpha-4	0.00031486	0.311377	11	61916
P32942	ICAM3_HUMAN	ICAM3	Intercellular adhesion molecule 3	0.00031462	0.290201	8	58514
P25101	EDNRA_HUMAN	EDNRA	Endothelin-1 receptor	0.00031462	0.282973	7	42004
Q15019	SEPT2_HUMAN	SEPT2	Septin-2	0.00031402	0.308576	8	79756
P43250	GRK6_HUMAN	GRK6	G protein-coupled receptor kinase 6	0.00031362	0.282649	13	52026
P25490	TYY1_HUMAN	TYY1	Transcriptional repressor protein YY1	0.00031304	0.31298	19	59890
Q9NPP4	NLRC4_HUMAN	NLRC4	NLR family CARD domain-containing protein 4	0.00031294	0.282235	13	45068
Q15078	CD5R1_HUMAN	CD5R1	Cyclin-dependent kinase 5 activator 1	0.00031261	0.310567	18	59066
P30281	CCND3_HUMAN	CCND3	G1/S-specific cyclin-D3	0.00031186	0.302699	20	61916
Q92835	SHIP1_HUMAN	SHIP1	Phosphatidylinositol-3,4,5-trisphosphate 5-phosphatase 1	0.000308	0.327691	32	77890
P20749	BCL3_HUMAN	BCL3	B-cell lymphoma 3-encoded protein	0.00030797	0.338942	22	111900
P08514	ITA2B_HUMAN	ITA2B	Integrin alpha-IIb	0.00030785	0.312218	14	60696
Q99996	AKAP9_HUMAN	AKAP9	A-kinase anchor protein 9	0.00030752	0.301462	13	45826
P24588	AKAP5_HUMAN	AKAP5	A-kinase anchor protein 5	0.00030714	0.302964	11	49232
Q6PD62	CTR9_HUMAN	CTR9	RNA polymerase-associated protein CTR9 homolog	0.00030519	0.266068	6	43082
P18464	1B51_HUMAN	1B51	HLA class I histocompatibility antigen, B-51 alpha chain	0.00030449	0.280794	9	53582
P31994	FCG2B_HUMAN	FCG2B	Low affinity immunoglobulin gamma Fc region receptor II-b	0.00030427	0.330189	15	75750
Q9UNE0	EDAR_HUMAN	EDAR	Tumor necrosis factor receptor superfamily member EDAR	0.00030339	0.289982	7	92888
P52564	MP2K6_HUMAN	MP2K6	Dual specificity mitogen-activated protein kinase kinase 6	0.0003024	0.312247	18	48246
O75306	NDUS2_HUMAN	NDUS2	NADH dehydrogenase [ubiquinone] iron-sulfur protein 2, mitochondrial	0.00030224	0.269482	5	109186
P06850	CRF_HUMAN	CRF	Corticoliberin	0.00030076	0.218419	4	111138
P49286	MTR1B_HUMAN	MTR1B	Melatonin receptor type 1B	0.00030053	0.310567	15	80070
O15264	MK13_HUMAN	MK13	Mitogen-activated protein kinase 13	0.00029796	0.281364	9	39644
P56539	CAV3_HUMAN	CAV3	Caveolin-3	0.00029732	0.298681	10	55842
P35372	OPRM_HUMAN	OPRM	Mu-type opioid receptor	0.00029729	0.301645	12	63156
P16615	AT2A2_HUMAN	AT2A2	Sarcoplasmic/endoplasmic reticulum calcium ATPase 2	0.00029712	0.326026	14	99462
Q13191	CBLB_HUMAN	CBLB	E3 ubiquitin-protein ligase CBL-B	0.00029536	0.331484	27	79150
O43908	NKG2F_HUMAN	NKG2F	NKG2-F type II integral membrane protein	0.00029527	0.21613	5	102616
O14543	SOCS3_HUMAN	SOCS3	Suppressor of cytokine signaling 3	0.00029455	0.316786	25	65478
Q14847	LASP1_HUMAN	LASP1	LIM and SH3 domain protein 1	0.00029226	0.292454	8	43542
P35580	MYH10_HUMAN	MYH10	Myosin-10	0.00029168	0.337555	19	108206
Q12967	GNDS_HUMAN	GNDS	Ral guanine nucleotide dissociation stimulator	0.00028996	0.309818	19	51536
P01160	ANF_HUMAN	ANF	Atrial natriuretic factor	0.00028852	0.261293	2	115882
P23582	ANFC_HUMAN	ANFC	C-type natriuretic peptideCNP-22CNP-29CNP-53	0.00028852	0.261293	2	115882
P43116	PE2R2_HUMAN	PE2R2	Prostaglandin E2 receptor EP2 subtype	0.00028843	0.178241	2	105018
Q92598	HS105_HUMAN	HS105	Heat shock protein 105 kDa	0.00028801	0.321518	12	51350
P17706	PTN2_HUMAN	PTN2	Tyrosine-protein phosphatase non-receptor type 2	0.00028607	0.332661	19	71640
Q9Y6J0	CABIN_HUMAN	CABIN	Calcineurin-binding protein cabin-1	0.00028544	0.303841	14	48194
P62987	RL40_HUMAN	RL40	60S ribosomal protein L40	0.0002846	0.312782	17	61064
Q9HAV5	TNR27_HUMAN	TNR27	Tumor necrosis factor receptor superfamily member 27	0.00028367	0.290615	6	74568
O43187	IRAK2_HUMAN	IRAK2	Interleukin-1 receptor-associated kinase-like 2	0.00028364	0.307863	14	49808
P31751	AKT2_HUMAN	AKT2	RAC-beta serine/threonine-protein kinase	0.00028238	0.320893	19	61548
P09544	WNT2_HUMAN	WNT2	Protein Wnt-2	0.00028212	0.211474	3	58758
Q93008	USP9X_HUMAN	USP9X	Probable ubiquitin carboxyl-terminal hydrolase FAF-X	0.000282	0.325872	26	70332
P08254	MMP3_HUMAN	MMP3	Stromelysin-1	0.0002809	0.271127	15	58256
P10301	RRAS_HUMAN	RRAS	Ras-related protein R-Ras	0.00028069	0.331865	16	82292
Q8N726	CD2A2_HUMAN	CD2A2	Cyclin-dependent kinase inhibitor 2A, isoform 4	0.00028017	0.315603	25	72724
Q9NQ66	PLCB1_HUMAN	PLCB1	1-phosphatidylinositol-4,5-bisphosphate phosphodiesterase beta-1	0.00028009	0.310373	10	61344
P01584	IL1B_HUMAN	IL1B	Interleukin-1 beta	0.00027921	0.28288	11	30074
O43809	CPSF5_HUMAN	CPSF5	Cleavage and polyadenylation specificity factor subunit 5	0.00027815	0.310317	16	58174
Q7Z434	MAVS_HUMAN	MAVS	Mitochondrial antiviral-signaling protein	0.00027782	0.299715	11	52762
Q13094	LCP2_HUMAN	LCP2	Lymphocyte cytosolic protein 2	0.00027772	0.329122	33	77780
P78386	KRT85_HUMAN	KRT85	Keratin, type II cuticular Hb5	0.00027757	0.282719	4	38682
O43566	RGS14_HUMAN	RGS14	Regulator of G-protein signaling 14	0.00027723	0.299223	8	53660
P50995	ANX11_HUMAN	ANX11	Annexin A11	0.00027685	0.266785	6	26680
P05198	IF2A_HUMAN	IF2A	Eukaryotic translation initiation factor 2 subunit 1	0.00027643	0.319296	16	54640
Q8NF91	SYNE1_HUMAN	SYNE1	Nesprin-1	0.00027519	0.31754	59	64620
P49336	CDK8_HUMAN	CDK8	Cell division protein kinase 8	0.0002734	0.29238	12	45192
Q15465	SHH_HUMAN	SHH	Sonic hedgehog protein	0.00027239	0.230908	6	89008
Q92918	M4K1_HUMAN	M4K1	Mitogen-activated protein kinase kinase kinase kinase 1	0.00027041	0.338181	25	82052
P48061	SDF1_HUMAN	SDF1	Stromal cell-derived factor 1	0.00026936	0.288798	11	39012
P51452	DUS3_HUMAN	DUS3	Dual specificity protein phosphatase 3	0.00026859	0.318123	11	48052
P46782	RS5_HUMAN	RS5	40S ribosomal protein S5	0.00026849	0.331357	55	109956
P55209	NP1L1_HUMAN	NP1L1	Nucleosome assembly protein 1-like 1	0.00026838	0.325872	16	113106
Q15633	TRBP2_HUMAN	TRBP2	TAR RNA-binding protein 2	0.00026754	0.309762	30	48136
P12259	FA5_HUMAN	FA5	Coagulation factor V	0.00026751	0.284646	8	37140
P04234	CD3D_HUMAN	CD3D	T-cell surface glycoprotein CD3 delta chain	0.00026713	0.282926	7	37230
P52735	VAV2_HUMAN	VAV2	Guanine nucleotide exchange factor VAV2	0.00026674	0.325108	19	65320
P13591	NCAM1_HUMAN	NCAM1	Neural cell adhesion molecule 1	0.00026615	0.300468	11	39422
P23759	PAX7_HUMAN	PAX7	Paired box protein Pax-7	0.00026269	0.306909	6	45654
Q95604	1C17_HUMAN	1C17	HLA class I histocompatibility antigen, Cw-17 alpha chain	0.00026208	0.282281	9	69618
Q9UBL3	ASH2L_HUMAN	ASH2L	Set1/Ash2 histone methyltransferase complex subunit ASH2	0.00026137	0.319178	16	56866
P52333	JAK3_HUMAN	JAK3	Tyrosine-protein kinase JAK3	0.00026107	0.323228	35	71578
Q7L576	CYFP1_HUMAN	CYFP1	Cytoplasmic FMR1-interacting protein 1	0.00026087	0.325658	28	64984
Q92542	NICA_HUMAN	NICA	Nicastrin	0.0002603	0.298501	13	51700
P50991	TCPD_HUMAN	TCPD	T-complex protein 1 subunit delta	0.00025936	0.323711	19	78720
Q13541	4EBP1_HUMAN	4EBP1	Eukaryotic translation initiation factor 4E-binding protein 1	0.00025881	0.309928	15	47570
P30307	MPIP3_HUMAN	MPIP3	M-phase inducer phosphatase 3	0.00025818	0.326302	16	55856
P13236	CCL4_HUMAN	CCL4	C-C motif chemokine 4	0.00025709	0.251707	8	106846
P68036	UB2L3_HUMAN	UB2L3	Ubiquitin-conjugating enzyme E2 L3	0.0002554	0.320448	11	61496
P49796	RGS3_HUMAN	RGS3	Regulator of G-protein signaling 3	0.00025495	0.317162	14	50014
O15467	CCL16_HUMAN	CCL16	C-C motif chemokine 16	0.00025487	0.248815	6	110768
Q9P2W3	GBG13_HUMAN	GBG13	Guanine nucleotide-binding protein G(I)/G(S)/G(O) subunit gamma-13	0.00025481	0.262162	17	32674
O14733	MP2K7_HUMAN	MP2K7	Dual specificity mitogen-activated protein kinase kinase 7	0.0002539	0.306447	20	52942
P15529	MCP_HUMAN	MCP	Membrane cofactor protein	0.00025314	0.304991	13	51852
P61086	UBE2K_HUMAN	UBE2K	Ubiquitin-conjugating enzyme E2 K	0.00025298	0.308055	9	50674
Q8WUI4	HDAC7_HUMAN	HDAC7	Histone deacetylase 7	0.00025292	0.312275	12	49846
P46100	ATRX_HUMAN	ATRX	Transcriptional regulator ATRX	0.00025271	0.293222	10	36436
O60496	DOK2_HUMAN	DOK2	Docking protein 2	0.00025191	0.3125	15	43258
O00410	IPO5_HUMAN	IPO5	Importin-5	0.00025149	0.285091	8	43966
P01308	INS_HUMAN	INS	InsulinInsulin B chainInsulin A chain	0.00025084	0.292405	10	45186
P01850	TCB_HUMAN	TCB	T-cell receptor beta chain C region	0.00025076	0.201817	2	114600
P17812	PYRG1_HUMAN	PYRG1	CTP synthase 1	0.00024941	0.318094	11	97598
O94776	MTA2_HUMAN	MTA2	Metastasis-associated protein MTA2	0.00024935	0.308055	20	50030
P31939	PUR9_HUMAN	PUR9	Bifunctional purine biosynthesis protein PURHPhosphoribosylaminoimidazolecarboxamide formyltransferase	0.00024933	0.308219	11	50320
P04114	APOB_HUMAN	APOB	Apolipoprotein B-100Apolipoprotein B-48	0.00024832	0.305582	10	52638
O95831	AIFM1_HUMAN	AIFM1	Apoptosis-inducing factor 1, mitochondrial	0.00024798	0.317162	16	76626
Q00534	CDK6_HUMAN	CDK6	Cell division protein kinase 6	0.00024792	0.317948	23	62768
P35241	RADI_HUMAN	RADI	Radixin	0.0002478	0.297936	16	43326
P51451	BLK_HUMAN	BLK	Tyrosine-protein kinase BLK	0.0002468	0.307018	12	50738
P23560	BDNF_HUMAN	BDNF	Brain-derived neurotrophic factor	0.00024565	0.286506	10	38784
P01130	LDLR_HUMAN	LDLR	Low-density lipoprotein receptor	0.00024474	0.294118	13	36932
Q8NFP9	NBEA_HUMAN	NBEA	Neurobeachin	0.00024296	0.306936	7	40974
P01282	VIP_HUMAN	VIP	VIP peptidesIntestinal peptide PHV-42Intestinal peptide PHM-27	0.00024291	0.264121	3	92156
Q16627	CCL14_HUMAN	CCL14	C-C motif chemokine 14	0.00024286	0.279864	5	52754
P19474	RO52_HUMAN	RO52	52 kDa Ro protein	0.00024245	0.313631	13	44958
Q02779	M3K10_HUMAN	M3K10	Mitogen-activated protein kinase kinase kinase 10	0.00024168	0.304428	16	48742
Q9UBN6	TR10D_HUMAN	TR10D	Tumor necrosis factor receptor superfamily member 10D	0.00024128	0.302858	22	48462
O00220	TR10A_HUMAN	TR10A	Tumor necrosis factor receptor superfamily member 10A	0.00023942	0.301435	17	40236
Q9NR12	PDLI7_HUMAN	PDLI7	PDZ and LIM domain protein 7	0.00023928	0.321399	12	48184
Q9NSA3	CNBP1_HUMAN	CNBP1	Beta-catenin-interacting protein 1	0.00023703	0.291642	6	31580
P08174	DAF_HUMAN	DAF	Complement decay-accelerating factor	0.00023638	0.294818	7	31282
Q92558	WASF1_HUMAN	WASF1	Wiskott-Aldrich syndrome protein family member 1	0.00023623	0.330472	19	65812
P53041	PPP5_HUMAN	PPP5	Serine/threonine-protein phosphatase 5	0.00023586	0.314857	14	50636
Q01344	IL5RA_HUMAN	IL5RA	Interleukin-5 receptor subunit alpha	0.00023579	0.306773	7	35512
P16949	STMN1_HUMAN	STMN1	Stathmin	0.0002357	0.327195	11	59328
P16150	LEUK_HUMAN	LEUK	Leukosialin	0.0002356	0.309044	10	38488
Q9Y624	JAM1_HUMAN	JAM1	Junctional adhesion molecule A	0.00023552	0.309735	13	42834
O15455	TLR3_HUMAN	TLR3	Toll-like receptor 3	0.00023518	0.317162	10	43938
O14639	ABLM1_HUMAN	ABLM1	Actin-binding LIM protein 1	0.00023424	0.322206	8	51504
P32302	CXCR5_HUMAN	CXCR5	C-X-C chemokine receptor type 5	0.00023408	0.27524	10	56030
O00567	NOL5A_HUMAN	NOL5A	Nucleolar protein 5A	0.00023299	0.316352	42	53938
Q04941	PLP2_HUMAN	PLP2	Proteolipid protein 2	0.00023205	0.284063	7	29522
P42680	TEC_HUMAN	TEC	Tyrosine-protein kinase Tec	0.00023162	0.315948	26	56778
Q13576	IQGA2_HUMAN	IQGA2	Ras GTPase-activating-like protein IQGAP2	0.00023009	0.318767	24	56154
Q14116	IL18_HUMAN	IL18	Interleukin-18	0.00022985	0.27232	5	33110
P09486	SPRC_HUMAN	SPRC	SPARC	0.00022982	0.277311	17	32592
O43524	FOXO3_HUMAN	FOXO3	Forkhead box protein O3	0.00022954	0.326118	16	60826
P00813	ADA_HUMAN	ADA	Adenosine deaminase	0.00022758	0.305071	6	28644
Q09161	NCBP1_HUMAN	NCBP1	Nuclear cap-binding protein subunit 1	0.00022689	0.305717	14	43724
O75815	BCAR3_HUMAN	BCAR3	Breast cancer anti-estrogen resistance protein 3	0.00022659	0.312754	15	45090
Q13435	SF3B2_HUMAN	SF3B2	Splicing factor 3B subunit 2	0.00022592	0.319355	37	67456
P02741	CRP_HUMAN	CRP	C-reactive proteinC-reactive protein(1-205)	0.0002259	0.276757	11	25614
O75116	ROCK2_HUMAN	ROCK2	Rho-associated protein kinase 2	0.00022431	0.312613	11	42960
Q00975	CAC1B_HUMAN	CAC1B	Voltage-dependent N-type calcium channel subunit alpha-1B	0.00022414	0.273956	9	35050
P31269	HXA9_HUMAN	HXA9	Homeobox protein Hox-A9	0.00022392	0.302594	8	42900
P08922	ROS_HUMAN	ROS	Proto-oncogene tyrosine-protein kinase ROS	0.00022332	0.306854	6	36630
P14543	NID1_HUMAN	NID1	Nidogen-1	0.00022322	0.288774	15	40582
Q9UBI6	GBG12_HUMAN	GBG12	Guanine nucleotide-binding protein G(I)/G(S)/G(O) subunit gamma-12	0.00022266	0.273093	17	53782
P14316	IRF2_HUMAN	IRF2	Interferon regulatory factor 2	0.00022201	0.316236	11	39720
P14210	HGF_HUMAN	HGF	Hepatocyte growth factor	0.00022147	0.2793	10	30816
P17655	CAN2_HUMAN	CAN2	Calpain-2 catalytic subunit	0.00022122	0.293619	11	31274
P15260	INGR1_HUMAN	INGR1	Interferon-gamma receptor alpha chain	0.00022044	0.30175	11	43660
P41594	GRM5_HUMAN	GRM5	Metabotropic glutamate receptor 5	0.00022009	0.310734	14	43986
Q9NR80	ARHG4_HUMAN	ARHG4	Rho guanine nucleotide exchange factor 4	0.0002198	0.32356	28	47224
P21917	DRD4_HUMAN	DRD4	D(4) dopamine receptor	0.00021841	0.298295	4	46106
O96013	PAK4_HUMAN	PAK4	Serine/threonine-protein kinase PAK 4	0.00021829	0.325413	11	59778
Q04323	UBXN1_HUMAN	UBXN1	UBX domain-containing protein 1	0.00021687	0.285632	10	31622
Q14653	IRF3_HUMAN	IRF3	Interferon regulatory factor 3	0.00021679	0.311321	15	43346
P13686	PPA5_HUMAN	PPA5	Tartrate-resistant acid phosphatase type 5	0.00021633	0.271084	6	26270
O75369	FLNB_HUMAN	FLNB	Filamin-B	0.00021595	0.324742	15	57022
Q07820	MCL1_HUMAN	MCL1	Induced myeloid leukemia cell differentiation protein Mcl-1	0.0002153	0.310261	19	46868
Q02241	KIF23_HUMAN	KIF23	Kinesin-like protein KIF23	0.00021499	0.306041	10	42246
Q12905	ILF2_HUMAN	ILF2	Interleukin enhancer-binding factor 2	0.00021486	0.317017	58	73886
P17858	K6PL_HUMAN	K6PL	6-phosphofructokinase, liver type	0.00021417	0.32116	17	56642
P11717	MPRI_HUMAN	MPRI	Cation-independent mannose-6-phosphate receptor	0.00021409	0.291299	10	25318
P03950	ANGI_HUMAN	ANGI	Angiogenin	0.00021401	0.269923	5	27828
Q14181	DPOA2_HUMAN	DPOA2	DNA polymerase subunit alpha B	0.00021397	0.285585	9	27220
Q13322	GRB10_HUMAN	GRB10	Growth factor receptor-bound protein 10	0.00021357	0.343443	24	79656
P42681	TXK_HUMAN	TXK	Tyrosine-protein kinase TXK	0.00021324	0.307945	11	38210
P13598	ICAM2_HUMAN	ICAM2	Intercellular adhesion molecule 2	0.00021308	0.281319	8	41244
Q8TB24	RIN3_HUMAN	RIN3	Ras and Rab interactor 3	0.00021295	0.322146	10	39952
P25774	CATS_HUMAN	CATS	Cathepsin S	0.00021267	0.273805	5	24538
P49418	AMPH_HUMAN	AMPH	Amphiphysin	0.00021259	0.303841	14	42706
P00749	UROK_HUMAN	UROK	Urokinase-type plasminogen activatorUrokinase-type plasminogen activator long chain AUrokinase-type plasminogen activator short chain AUrokinase-type plasminogen activator chain B	0.00021233	0.270365	15	32876
Q9Y6X2	PIAS3_HUMAN	PIAS3	E3 SUMO-protein ligase PIAS3	0.00021202	0.324074	19	57752
P36888	FLT3_HUMAN	FLT3	FL cytokine receptor	0.00021057	0.308768	12	29296
O15551	CLD3_HUMAN	CLD3	Claudin-3	0.00021019	0.270682	3	28076
P78371	TCPB_HUMAN	TCPB	T-complex protein 1 subunit beta	0.00021004	0.320774	16	63742
P61925	IPKA_HUMAN	IPKA	cAMP-dependent protein kinase inhibitor alpha	0.00020996	0.301698	6	32788
Q9UJU6	DBNL_HUMAN	DBNL	Drebrin-like protein	0.00020933	0.295069	10	48510
P20908	CO5A1_HUMAN	CO5A1	Collagen alpha-1(V) chain	0.00020788	0.283111	7	61586
P0C0L5	CO4B_HUMAN	CO4B	Complement C4-B	0.00020663	0.274651	4	27552
O76081	RGS20_HUMAN	RGS20	Regulator of G-protein signaling 20	0.00020624	0.30596	8	39148
P01135	TGFA_HUMAN	TGFA	Protransforming growth factor alphaTransforming growth factor alpha	0.00020621	0.297323	10	30872
P13688	CEAM1_HUMAN	CEAM1	Carcinoembryonic antigen-related cell adhesion molecule 1	0.00020515	0.323047	13	38580
P54753	EPHB3_HUMAN	EPHB3	Ephrin type-B receptor 3	0.00020489	0.296661	8	35094
P11137	MAP2_HUMAN	MAP2	Microtubule-associated protein 2	0.0002042	0.329749	12	62638
P15976	GATA1_HUMAN	GATA1	Erythroid transcription factor	0.00020372	0.31962	18	53122
Q15306	IRF4_HUMAN	IRF4	Interferon regulatory factor 4	0.00020344	0.281045	8	28864
Q99259	DCE1_HUMAN	DCE1	Glutamate decarboxylase 1	0.00020223	0.322686	11	58356
P45379	TNNT2_HUMAN	TNNT2	Troponin T, cardiac muscle	0.00020192	0.28875	5	35252
P35916	VGFR3_HUMAN	VGFR3	Vascular endothelial growth factor receptor 3	0.00020168	0.312218	12	40900
Q9NP84	TNR12_HUMAN	TNR12	Tumor necrosis factor receptor superfamily member 12A	0.00020149	0.280521	6	39066
P31260	HXA10_HUMAN	HXA10	Homeobox protein Hox-A10	0.00020064	0.296534	8	40644
P35346	SSR5_HUMAN	SSR5	Somatostatin receptor type 5	0.00019962	0.229394	6	28720
P37231	PPARG_HUMAN	PPARG	Peroxisome proliferator-activated receptor gamma	0.00019914	0.313376	26	58592
Q96F07	CYFP2_HUMAN	CYFP2	Cytoplasmic FMR1-interacting protein 2	0.00019909	0.320626	21	49802
P18827	SDC1_HUMAN	SDC1	Syndecan-1	0.00019859	0.277533	13	24450
Q15833	STXB2_HUMAN	STXB2	Syntaxin-binding protein 2	0.00019844	0.269419	10	36470
P29474	NOS3_HUMAN	NOS3	Nitric oxide synthase, endothelial	0.00019803	0.317192	13	40612
P56545	CTBP2_HUMAN	CTBP2	C-terminal-binding protein 2	0.00019801	0.296078	15	41178
P29965	CD40L_HUMAN	CD40L	CD40 ligand	0.00019776	0.289305	6	24948
Q13557	KCC2D_HUMAN	KCC2D	Calcium/calmodulin-dependent protein kinase type II delta chain	0.00019717	0.326579	13	47414
O14593	RFXK_HUMAN	RFXK	DNA-binding protein RFXANK	0.00019716	0.285726	9	31954
P68431	H31_HUMAN	H31	Histone H3.1	0.00019713	0.313773	9	34698
P05230	FGF1_HUMAN	FGF1	Heparin-binding growth factor 1	0.00019684	0.29628	11	48304
P53779	MK10_HUMAN	MK10	Mitogen-activated protein kinase 10	0.00019655	0.311265	14	44208
Q9UJS0	CMC2_HUMAN	CMC2	Calcium-binding mitochondrial carrier protein Aralar2	0.00019564	0.3142	25	41092
Q06787	FMR1_HUMAN	FMR1	Fragile X mental retardation 1 protein	0.00019553	0.310651	49	43760
P21580	TNAP3_HUMAN	TNAP3	Tumor necrosis factor, alpha-induced protein 3	0.00019518	0.316063	16	59056
Q15366	PCBP2_HUMAN	PCBP2	Poly(rC)-binding protein 2	0.00019482	0.31219	47	45896
Q7L2H7	EIF3M_HUMAN	EIF3M	Eukaryotic translation initiation factor 3 subunit M	0.00019482	0.342662	44	82220
Q8WU20	FRS2_HUMAN	FRS2	Fibroblast growth factor receptor substrate 2	0.0001942	0.337818	24	61396
Q02223	TNR17_HUMAN	TNR17	Tumor necrosis factor receptor superfamily member 17	0.00019372	0.269398	5	48404
Q9NSE2	CISH_HUMAN	CISH	Cytokine-inducible SH2-containing protein	0.00019351	0.316409	15	45166
P16520	GBB3_HUMAN	GBB3	Guanine nucleotide-binding protein G(I)/G(S)/G(T) subunit beta-3	0.00019293	0.268355	16	45288
P49682	CXCR3_HUMAN	CXCR3	C-X-C chemokine receptor type 3	0.00019281	0.23885	11	41102
Q8IZI9	IL28B_HUMAN	IL28B	Interleukin-28B	0.00019229	0.176327	2	84766
Q8IZJ0	IL28A_HUMAN	IL28A	Interleukin-28A	0.00019229	0.176327	2	84766
Q8IU54	IL29_HUMAN	IL29	Interleukin-29	0.00019229	0.176327	2	84766
P04080	CYTB_HUMAN	CYTB	Cystatin-B	0.00019211	0.286387	6	30552
Q8IZP0	ABI1_HUMAN	ABI1	Abl interactor 1	0.00019189	0.312444	20	41536
P16870	CBPE_HUMAN	CBPE	Carboxypeptidase E	0.00019123	0.25056	9	23220
P09493	TPM1_HUMAN	TPM1	Tropomyosin alpha-1 chain	0.00019061	0.318182	10	37256
Q16548	B2LA1_HUMAN	B2LA1	Bcl-2-related protein A1	0.00019049	0.302832	9	21246
Q9BUB5	MKNK1_HUMAN	MKNK1	MAP kinase-interacting serine/threonine-protein kinase 1	0.00019033	0.299585	11	36216
Q92974	ARHG2_HUMAN	ARHG2	Rho guanine nucleotide exchange factor 2	0.00019027	0.32365	22	52750
P31942	HNRH3_HUMAN	HNRH3	Heterogeneous nuclear ribonucleoprotein H3	0.00018935	0.287337	6	27538
P41970	ELK3_HUMAN	ELK3	ETS domain-containing protein Elk-3	0.00018931	0.322326	13	50132
P61952	GBG11_HUMAN	GBG11	Guanine nucleotide-binding protein G(I)/G(S)/G(O) subunit gamma-11	0.00018889	0.264403	17	31586
P47736	RPGP1_HUMAN	RPGP1	Rap1 GTPase-activating protein 1	0.00018829	0.325413	16	39270
O43143	DHX15_HUMAN	DHX15	Putative pre-mRNA-splicing factor ATP-dependent RNA helicase DHX15	0.00018812	0.32119	37	61296
O00329	PK3CD_HUMAN	PK3CD	Phosphatidylinositol-4,5-bisphosphate 3-kinase catalytic subunit delta isoform	0.00018781	0.293445	11	35874
Q14213	IL27B_HUMAN	IL27B	Interleukin-27 subunit beta	0.00018757	0.285538	4	23754
Q9Y3Q8	T22D4_HUMAN	T22D4	TSC22 domain family protein 4	0.00018581	0.297962	11	27944
Q92625	ANS1A_HUMAN	ANS1A	Ankyrin repeat and SAM domain-containing protein 1A	0.00018574	0.303097	5	34860
P08887	IL6RA_HUMAN	IL6RA	Interleukin-6 receptor subunit alpha	0.00018503	0.305448	9	30452
Q13043	STK4_HUMAN	STK4	Serine/threonine-protein kinase 4	0.00018486	0.308576	11	31610
Q969H4	CNKR1_HUMAN	CNKR1	Connector enhancer of kinase suppressor of ras 1	0.00018324	0.300755	14	32134
Q8IUQ4	SIAH1_HUMAN	SIAH1	E3 ubiquitin-protein ligase SIAH1	0.00018306	0.307672	14	31666
O00505	IMA3_HUMAN	IMA3	Importin subunit alpha-3	0.00018248	0.323681	22	54752
Q96D71	REPS1_HUMAN	REPS1	RalBP1-associated Eps domain-containing protein 1	0.00018205	0.309984	8	34490
P08572	CO4A2_HUMAN	CO4A2	Collagen alpha-2(IV) chainCanstatin	0.00018196	0.281845	13	53154
P25791	RBTN2_HUMAN	RBTN2	Rhombotin-2	0.00018148	0.302251	15	35320
P15153	RAC2_HUMAN	RAC2	Ras-related C3 botulinum toxin substrate 2	0.00018113	0.304696	12	28730
O95838	GLP2R_HUMAN	GLP2R	Glucagon-like peptide 2 receptor	0.00018034	0.268813	2	28874
P21731	TA2R_HUMAN	TA2R	Thromboxane A2 receptor	0.00018004	0.301488	10	33272
O95630	STABP_HUMAN	STABP	STAM-binding protein	0.00017884	0.309596	10	35680
P30530	UFO_HUMAN	UFO	Tyrosine-protein kinase receptor UFO	0.00017842	0.327815	20	47920
O14976	GAK_HUMAN	GAK	Cyclin G-associated kinase	0.00017788	0.311601	9	30530
P54274	TERF1_HUMAN	TERF1	Telomeric repeat-binding factor 1	0.00017695	0.309237	13	29866
P52701	MSH6_HUMAN	MSH6	DNA mismatch repair protein Msh6	0.00017675	0.308824	15	38604
Q9UM54	MYO6_HUMAN	MYO6	Myosin-VI	0.00017672	0.329843	14	51594
P02776	PLF4_HUMAN	PLF4	Platelet factor 4	0.00017618	0.262898	10	23762
Q8N8S7	ENAH_HUMAN	ENAH	Protein enabled homolog	0.00017614	0.288654	11	31690
O75081	MTG16_HUMAN	MTG16	Protein CBFA2T3	0.0001759	0.284763	8	41158
P30459	1A74_HUMAN	1A74	HLA class I histocompatibility antigen, A-74 alpha chain	0.00017558	0.273718	7	39852
Q07000	1C15_HUMAN	1C15	HLA class I histocompatibility antigen, Cw-15 alpha chain	0.00017521	0.278135	9	47054
Q9UJY4	GGA2_HUMAN	GGA2	ADP-ribosylation factor-binding protein GGA2	0.00017521	0.287815	13	25378
P26951	IL3RA_HUMAN	IL3RA	Interleukin-3 receptor subunit alpha	0.00017451	0.314457	13	43148
Q9Y5M8	SRPRB_HUMAN	SRPRB	Signal recognition particle receptor subunit beta	0.00017447	0.292553	10	29434
P53985	MOT1_HUMAN	MOT1	Monocarboxylate transporter 1	0.00017438	0.287028	4	27582
P26045	PTN3_HUMAN	PTN3	Tyrosine-protein phosphatase non-receptor type 3	0.00017435	0.309044	10	32330
P26022	PTX3_HUMAN	PTX3	Pentraxin-related protein PTX3	0.00017431	0.249964	7	20492
Q9HCU4	CELR2_HUMAN	CELR2	Cadherin EGF LAG seven-pass G-type receptor 2	0.00017367	0.301016	5	24236
Q04721	NOTC2_HUMAN	NOTC2	Neurogenic locus notch homolog protein 2Notch 2 extracellular truncationNotch 2 intracellular domain	0.00017315	0.286482	10	29608
P31431	SDC4_HUMAN	SDC4	Syndecan-4	0.00017267	0.305798	11	33804
O75689	CENA1_HUMAN	CENA1	Centaurin-alpha-1	0.00017265	0.308439	13	34084
Q99952	PTN18_HUMAN	PTN18	Tyrosine-protein phosphatase non-receptor type 18	0.00017227	0.305852	9	31862
P59998	ARPC4_HUMAN	ARPC4	Actin-related protein 2/3 complex subunit 4	0.0001721	0.302858	11	20194
P17947	SPI1_HUMAN	SPI1	Transcription factor PU.1	0.00017138	0.309403	22	39214
O75791	GRAP2_HUMAN	GRAP2	GRB2-related adapter protein 2	0.00017136	0.310595	19	35482
A7KAX9	RICS_HUMAN	RICS	Rho/Cdc42/Rac GTPase-activating protein RICS	0.00017075	0.330094	20	51970
P63092	GNAS2_HUMAN	GNAS2	Guanine nucleotide-binding protein G(s) subunit alpha isoforms short	0.00016979	0.259959	11	29904
O00463	TRAF5_HUMAN	TRAF5	TNF receptor-associated factor 5	0.00016933	0.301043	21	44912
Q12769	NU160_HUMAN	NU160	Nuclear pore complex protein Nup160	0.0001693	0.230815	3	27628
O43918	AIRE_HUMAN	AIRE	Autoimmune regulator	0.00016918	0.331706	13	47154
Q9H4B4	PLK3_HUMAN	PLK3	Serine/threonine-protein kinase PLK3	0.00016832	0.306285	7	34914
Q9NPB6	PAR6A_HUMAN	PAR6A	Partitioning defective 6 homolog alpha	0.0001682	0.308521	15	34706
Q9C000	NALP1_HUMAN	NALP1	NACHT, LRR and PYD domains-containing protein 1	0.00016729	0.279458	14	26304
P24593	IBP5_HUMAN	IBP5	Insulin-like growth factor-binding protein 5	0.00016726	0.299171	10	30008
P14174	MIF_HUMAN	MIF	Macrophage migration inhibitory factor	0.00016687	0.308137	14	59250
P26715	NKG2A_HUMAN	NKG2A	NKG2-A/NKG2-B type II integral membrane protein	0.00016652	0.279098	4	36832
Q99700	ATX2_HUMAN	ATX2	Ataxin-2	0.00016589	0.28542	8	16330
Q13972	RGRF1_HUMAN	RGRF1	Ras-specific guanine nucleotide-releasing factor 1	0.0001658	0.321041	12	42682
P67812	SC11A_HUMAN	SC11A	Signal peptidase complex catalytic subunit SEC11A	0.0001654	0.289015	5	35108
P50990	TCPQ_HUMAN	TCPQ	T-complex protein 1 subunit theta	0.00016493	0.321399	16	57994
O14757	CHK1_HUMAN	CHK1	Serine/threonine-protein kinase Chk1	0.00016435	0.334266	20	53574
Q15349	KS6A2_HUMAN	KS6A2	Ribosomal protein S6 kinase alpha-2	0.00016158	0.321041	13	44590
Q8TEX9	IPO4_HUMAN	IPO4	Importin-4	0.00016152	0.312641	22	34806
Q02447	SP3_HUMAN	SP3	Transcription factor Sp3	0.00016141	0.314086	15	33496
Q8ND90	PNMA1_HUMAN	PNMA1	Paraneoplastic antigen Ma1	0.00016117	0.313121	16	27536
O95373	IPO7_HUMAN	IPO7	Importin-7	0.00016105	0.338148	12	92934
P53396	ACLY_HUMAN	ACLY	ATP-citrate synthase	0.00016055	0.307235	12	37998
Q9UKW4	VAV3_HUMAN	VAV3	Guanine nucleotide exchange factor VAV3	0.00015997	0.331547	17	45758
O60936	NOL3_HUMAN	NOL3	Nucleolar protein 3	0.0001595	0.30154	11	24884
P32856	STX2_HUMAN	STX2	Syntaxin-2	0.00015948	0.242545	6	28296
Q92844	TANK_HUMAN	TANK	TRAF family member-associated NF-kappa-B activator	0.00015922	0.322506	23	44932
P13647	K2C5_HUMAN	K2C5	Keratin, type II cytoskeletal 5	0.00015901	0.301278	8	22158
P10082	PYY_HUMAN	PYY	Peptide YY	0.00015744	0.192489	4	26282
Q14623	IHH_HUMAN	IHH	Indian hedgehog protein	0.00015714	0.225924	3	59868
O43323	DHH_HUMAN	DHH	Desert hedgehog protein	0.00015714	0.225924	3	59868
Q13671	RIN1_HUMAN	RIN1	Ras and Rab interactor 1	0.00015707	0.313972	12	35408
Q8WV28	BLNK_HUMAN	BLNK	B-cell linker protein	0.00015704	0.329937	24	40312
Q13085	ACACA_HUMAN	ACACA	Acetyl-CoA carboxylase 1	0.0001567	0.302224	7	22782
Q99616	CCL13_HUMAN	CCL13	C-C motif chemokine 13	0.00015637	0.256401	9	42060
O95832	CLD1_HUMAN	CLD1	Claudin-1	0.00015589	0.261588	8	18074
Q13562	NDF1_HUMAN	NDF1	Neurogenic differentiation factor 1	0.00015587	0.297988	10	26228
P26196	DDX6_HUMAN	DDX6	Probable ATP-dependent RNA helicase DDX6	0.00015582	0.308851	6	29890
P60568	IL2_HUMAN	IL2	Interleukin-2	0.00015579	0.281662	10	23336
P63215	GBG3_HUMAN	GBG3	Guanine nucleotide-binding protein G(I)/G(S)/G(O) subunit gamma-3	0.00015557	0.254368	17	17926
P09237	MMP7_HUMAN	MMP7	Matrilysin	0.00015512	0.281891	11	34190
Q92985	IRF7_HUMAN	IRF7	Interferon regulatory factor 7	0.00015497	0.308824	13	40720
P23946	CMA1_HUMAN	CMA1	Chymase	0.00015487	0.252772	7	15758
P28221	5HT1D_HUMAN	5HT1D	5-hydroxytryptamine receptor 1D	0.00015407	0.240291	6	45214
Q99466	NOTC4_HUMAN	NOTC4	Neurogenic locus notch homolog protein 4Notch 4 extracellular truncationNotch 4 intracellular domain	0.00015397	0.29025	10	33660
P53602	ERG19_HUMAN	ERG19	Diphosphomevalonate decarboxylase	0.00015291	0.269252	5	25126
Q14186	TFDP1_HUMAN	TFDP1	Transcription factor Dp-1	0.00015256	0.304615	16	30924
P05121	PAI1_HUMAN	PAI1	Plasminogen activator inhibitor 1	0.00015233	0.282419	13	22292
Q9H2X3	CLC4M_HUMAN	CLC4M	C-type lectin domain family 4 member M	0.00015219	0.271509	7	25638
P50395	GDIB_HUMAN	GDIB	Rab GDP dissociation inhibitor beta	0.00015196	0.301278	11	43036
Q9Y6E0	STK24_HUMAN	STK24	Serine/threonine-protein kinase 24	0.0001518	0.309651	17	32712
P05112	IL4_HUMAN	IL4	Interleukin-4	0.00015176	0.258447	6	23308
P18564	ITB6_HUMAN	ITB6	Integrin beta-6	0.00015173	0.316583	11	37642
P06702	S10A9_HUMAN	S10A9	Protein S100-A9	0.00014995	0.311545	10	33572
Q12860	CNTN1_HUMAN	CNTN1	Contactin-1	0.00014995	0.292257	10	18312
O14544	SOCS6_HUMAN	SOCS6	Suppressor of cytokine signaling 6	0.00014989	0.308851	12	33118
Q03181	PPARD_HUMAN	PPARD	Peroxisome proliferator-activated receptor delta	0.00014952	0.315086	14	35948
P08603	CFAH_HUMAN	CFAH	Complement factor H	0.00014922	0.273762	7	14784
Q9Y239	NOD1_HUMAN	NOD1	Nucleotide-binding oligomerization domain-containing protein 1	0.00014878	0.301829	14	35516
Q92664	TF3A_HUMAN	TF3A	Transcription factor IIIA	0.0001482	0.301043	6	24652
P31949	S10AB_HUMAN	S10AB	Protein S100-A11	0.00014815	0.320063	10	46704
P15121	ALDR_HUMAN	ALDR	Aldose reductase	0.00014814	0.304188	8	38670
Q14469	HES1_HUMAN	HES1	Transcription factor HES-1	0.00014806	0.307317	10	25698
P49840	GSK3A_HUMAN	GSK3A	Glycogen synthase kinase-3 alpha	0.00014776	0.327319	16	47542
O00590	CCBP2_HUMAN	CCBP2	Chemokine-binding protein 2	0.00014737	0.24479	13	30678
P18846	ATF1_HUMAN	ATF1	Cyclic AMP-dependent transcription factor ATF-1	0.00014685	0.309347	17	36090
Q16832	DDR2_HUMAN	DDR2	Discoidin domain-containing receptor 2	0.00014626	0.299404	5	20032
P09086	PO2F2_HUMAN	PO2F2	POU domain, class 2, transcription factor 2	0.0001453	0.302779	12	40526
P31314	TLX1_HUMAN	TLX1	T-cell leukemia homeobox protein 1	0.00014448	0.271999	7	22864
P01111	RASN_HUMAN	RASN	GTPase NRas	0.00014419	0.299171	10	31298
P01138	NGF_HUMAN	NGF	Beta-nerve growth factor	0.00014372	0.288438	12	21232
O95425	SVIL_HUMAN	SVIL	Supervillin	0.00014332	0.325964	9	45788
O95433	AHSA1_HUMAN	AHSA1	Activator of 90 kDa heat shock protein ATPase homolog 1	0.00014277	0.303044	7	29094
P47871	GLR_HUMAN	GLR	Glucagon receptor	0.00014254	0.244894	4	11400
P21359	NF1_HUMAN	NF1	Neurofibromin	0.00014203	0.307072	10	32278
P34820	BMP8B_HUMAN	BMP8B	Bone morphogenetic protein 8B	0.00014161	0.294118	5	19814
O95837	GNA14_HUMAN	GNA14	Guanine nucleotide-binding protein subunit alpha-14	0.00014131	0.261529	7	18952
P52630	STAT2_HUMAN	STAT2	Signal transducer and activator of transcription 2	0.00014043	0.312726	14	38642
P07357	CO8A_HUMAN	CO8A	Complement component C8 alpha chain	0.00014001	0.249928	4	27896
Q8N423	LIRB2_HUMAN	LIRB2	Leukocyte immunoglobulin-like receptor subfamily B member 2	0.00013943	0.274217	10	26634
P11166	GTR1_HUMAN	GTR1	Solute carrier family 2, facilitated glucose transporter member 1	0.00013887	0.301567	8	29656
P16157	ANK1_HUMAN	ANK1	Ankyrin-1	0.00013881	0.285138	8	19156
Q14566	MCM6_HUMAN	MCM6	DNA replication licensing factor MCM6	0.00013858	0.29342	10	19702
P05109	S10A8_HUMAN	S10A8	Protein S100-A8	0.00013844	0.308989	13	26438
Q13241	KLRD1_HUMAN	KLRD1	Natural killer cells antigen CD94	0.00013842	0.23702	9	20792
P20701	ITAL_HUMAN	ITAL	Integrin alpha-L	0.00013839	0.288198	10	17444
P61077	UB2D3_HUMAN	UB2D3	Ubiquitin-conjugating enzyme E2 D3	0.00013777	0.313916	10	51114
P01215	GLHA_HUMAN	GLHA	Glycoprotein hormones alpha chain	0.00013776	0.25957	8	18282
O43390	HNRPR_HUMAN	HNRPR	Heterogeneous nuclear ribonucleoprotein R	0.00013755	0.320507	7	40912
Q13443	ADAM9_HUMAN	ADAM9	ADAM 9	0.00013738	0.29103	10	18576
O14727	APAF_HUMAN	APAF	Apoptotic protease-activating factor 1	0.0001368	0.310095	13	31686
Q9HAV0	GBB4_HUMAN	GBB4	Guanine nucleotide-binding protein subunit beta-4	0.00013674	0.269692	18	47020
P62906	RL10A_HUMAN	RL10A	60S ribosomal protein L10a	0.00013525	0.322236	45	51024
Q01970	PLCB3_HUMAN	PLCB3	1-phosphatidylinositol-4,5-bisphosphate phosphodiesterase beta-3	0.00013524	0.285068	9	19480
Q9UEU0	VTI1B_HUMAN	VTI1B	Vesicle transport through interaction with t-SNAREs homolog 1B	0.00013516	0.250978	6	20486
Q02363	ID2_HUMAN	ID2	DNA-binding protein inhibitor ID-2	0.00013512	0.297553	19	28850
Q9UJX6	ANC2_HUMAN	ANC2	Anaphase-promoting complex subunit 2	0.00013497	0.290396	6	18156
P49959	MRE11_HUMAN	MRE11	Double-strand break repair protein MRE11A	0.00013446	0.29943	17	24986
P29459	IL12A_HUMAN	IL12A	Interleukin-12 subunit alpha	0.00013394	0.247624	7	21466
Q99578	RIT2_HUMAN	RIT2	GTP-binding protein Rit2	0.00013372	0.316872	8	33290
P54829	PTN5_HUMAN	PTN5	Tyrosine-protein phosphatase non-receptor type 5	0.00013351	0.302435	4	26404
P52799	EFNB2_HUMAN	EFNB2	Ephrin-B2	0.00013345	0.300781	15	25096
P80075	CCL8_HUMAN	CCL8	C-C motif chemokine 8	0.00013317	0.2542	9	44758
Q08999	RBL2_HUMAN	RBL2	Retinoblastoma-like protein 2	0.00013285	0.30729	21	34468
P06753	TPM3_HUMAN	TPM3	Tropomyosin alpha-3 chain	0.0001326	0.321012	13	49148
P20309	ACM3_HUMAN	ACM3	Muscarinic acetylcholine receptor M3	0.00013221	0.28411	7	17384
P11836	CD20_HUMAN	CD20	B-lymphocyte antigen CD20	0.00013212	0.313575	9	37602
P02748	CO9_HUMAN	CO9	Complement component C9Complement component C9aComplement component C9b	0.00013197	0.250851	4	26876
O43150	DDEF2_HUMAN	DDEF2	Development and differentiation-enhancing factor 2	0.00013182	0.332661	15	43896
Q07812	BAX_HUMAN	BAX	Apoptosis regulator BAX	0.00013175	0.302382	17	24340
P48058	GRIA4_HUMAN	GRIA4	Glutamate receptor 4	0.00013135	0.301226	13	26608
P08913	ADA2A_HUMAN	ADA2A	Alpha-2A adrenergic receptor	0.00013105	0.304857	8	30418
P04632	CPNS1_HUMAN	CPNS1	Calpain small subunit 1	0.00013087	0.291642	8	16400
O15144	ARPC2_HUMAN	ARPC2	Actin-related protein 2/3 complex subunit 2	0.00013026	0.317802	11	34276
Q9H4A3	WNK1_HUMAN	WNK1	Serine/threonine-protein kinase WNK1	0.00013002	0.298655	7	19848
Q13368	MPP3_HUMAN	MPP3	MAGUK p55 subfamily member 3	0.00012993	0.250996	5	16334
P16581	LYAM2_HUMAN	LYAM2	E-selectin	0.00012784	0.311601	11	27400
P19237	TNNI1_HUMAN	TNNI1	Troponin I, slow skeletal muscle	0.0001271	0.264262	3	24726
P13727	PRG2_HUMAN	PRG2	Bone marrow proteoglycan	0.00012688	0.284974	4	21472
Q00722	PLCB2_HUMAN	PLCB2	1-phosphatidylinositol-4,5-bisphosphate phosphodiesterase beta-2	0.00012682	0.284249	8	12884
O75460	ERN1_HUMAN	ERN1	Serine/threonine-protein kinase/endoribonuclease IRE1	0.00012672	0.303548	10	26064
Q96KB5	TOPK_HUMAN	TOPK	Lymphokine-activated killer T-cell-originated protein kinase	0.00012659	0.306909	9	29192
Q08499	PDE4D_HUMAN	PDE4D	cAMP-specific 3',5'-cyclic phosphodiesterase 4D	0.00012632	0.334524	13	60334
Q13620	CUL4B_HUMAN	CUL4B	Cullin-4B	0.00012595	0.312331	28	23488
P52594	NUPL_HUMAN	NUPL	Nucleoporin-like protein RIP	0.00012593	0.268688	6	19914
Q9NR30	DDX21_HUMAN	DDX21	Nucleolar RNA helicase 2	0.00012577	0.311881	10	44164
P05455	LA_HUMAN	LA	Lupus La protein	0.00012573	0.31366	11	48730
Q15399	TLR1_HUMAN	TLR1	Toll-like receptor 1	0.00012566	0.283575	7	19008
Q13283	G3BP1_HUMAN	G3BP1	Ras GTPase-activating protein-binding protein 1	0.00012507	0.329247	14	56426
Q15762	CD226_HUMAN	CD226	CD226 antigen	0.00012481	0.281478	4	15442
O14746	TERT_HUMAN	TERT	Telomerase reverse transcriptase	0.00012431	0.333686	15	38532
Q08289	CACB2_HUMAN	CACB2	Voltage-dependent L-type calcium channel subunit beta-2	0.00012396	0.271637	3	16356
Q06481	APLP2_HUMAN	APLP2	Amyloid-like protein 2	0.00012387	0.312839	11	23604
P58753	TIRAP_HUMAN	TIRAP	Toll/interleukin-1 receptor domain-containing adapter protein	0.00012383	0.298655	13	23242
P17302	CXA1_HUMAN	CXA1	Gap junction alpha-1 protein	0.00012367	0.317511	14	30250
Q7KZF4	SND1_HUMAN	SND1	Staphylococcal nuclease domain-containing protein 1	0.00012294	0.297068	8	21830
Q9UJU2	LEF1_HUMAN	LEF1	Lymphoid enhancer-binding factor 1	0.00012274	0.309237	16	27966
O43927	CXL13_HUMAN	CXL13	C-X-C motif chemokine 13	0.00012215	0.252294	7	17690
P07333	CSF1R_HUMAN	CSF1R	Macrophage colony-stimulating factor 1 receptor	0.0001219	0.325719	19	35270
Q13705	AVR2B_HUMAN	AVR2B	Activin receptor type-2B	0.00012183	0.26507	13	30982
O95996	APC2_HUMAN	APC2	Adenomatous polyposis coli protein 2	0.00012175	0.291789	7	19756
P03973	SLPI_HUMAN	SLPI	Antileukoproteinase	0.00012172	0.281456	8	17170
Q16520	BATF_HUMAN	BATF	Basic leucine zipper transcriptional factor ATF-like	0.00012136	0.27625	13	34894
Q9UBK9	UXT_HUMAN	UXT	Protein UXT	0.00012013	0.304428	12	24874
Q16236	NF2L2_HUMAN	NF2L2	Nuclear factor erythroid 2-related factor 2	0.00011938	0.303841	11	28236
P35625	TIMP3_HUMAN	TIMP3	Metalloproteinase inhibitor 3	0.00011868	0.273978	8	20478
O95990	F107A_HUMAN	F107A	Protein FAM107A	0.00011758	0.294718	7	21122
P12644	BMP4_HUMAN	BMP4	Bone morphogenetic protein 4	0.00011758	0.255946	8	25648
O15117	FYB_HUMAN	FYB	FYN-binding protein	0.00011744	0.312867	15	26588
P30988	CALCR_HUMAN	CALCR	Calcitonin receptor	0.00011669	0.295019	5	19962
Q9UJ41	RABX5_HUMAN	RABX5	Rab5 GDP/GTP exchange factor	0.00011666	0.308411	9	20652
Q13564	ULA1_HUMAN	ULA1	NEDD8-activating enzyme E1 regulatory subunit	0.00011621	0.321488	26	29410
P35030	TRY3_HUMAN	TRY3	Trypsin-3	0.00011616	0.277978	4	19264
P30559	OXYR_HUMAN	OXYR	Oxytocin receptor	0.00011602	0.276316	6	27898
P13945	ADRB3_HUMAN	ADRB3	Beta-3 adrenergic receptor	0.00011601	0.294343	6	21384
P01583	IL1A_HUMAN	IL1A	Interleukin-1 alpha	0.00011555	0.274542	8	16980
Q92841	DDX17_HUMAN	DDX17	Probable ATP-dependent RNA helicase DDX17	0.00011546	0.307508	9	22580
O43815	STRN_HUMAN	STRN	Striatin	0.00011504	0.308329	11	21682
P35354	PGH2_HUMAN	PGH2	Prostaglandin G/H synthase 2	0.00011437	0.297706	6	17442
Q02297	NRG1_HUMAN	NRG1	Pro-neuregulin-1, membrane-bound isoformNeuregulin-1	0.00011429	0.308989	14	27446
P01116	RASK_HUMAN	RASK	GTPase KRas	0.00011402	0.296966	9	23654
P42684	ABL2_HUMAN	ABL2	Tyrosine-protein kinase ABL2	0.00011374	0.335301	21	37816
Q9P0K7	RAI14_HUMAN	RAI14	Ankycorbin	0.00011335	0.322536	8	37302
Q09013	DMPK_HUMAN	DMPK	Myotonin-protein kinase	0.00011319	0.289498	5	18484
P10242	MYB_HUMAN	MYB	Myb proto-oncogene protein	0.00011313	0.313631	16	35342
P24043	LAMA2_HUMAN	LAMA2	Laminin subunit alpha-2	0.0001128	0.249281	3	22082
P62314	SMD1_HUMAN	SMD1	Small nuclear ribonucleoprotein Sm D1	0.00011272	0.301961	16	26732
P01127	PDGFB_HUMAN	PDGFB	Platelet-derived growth factor subunit B	0.00011252	0.284179	10	21040
P17813	EGLN_HUMAN	EGLN	Endoglin	0.00011203	0.267299	14	26460
P10646	TFPI1_HUMAN	TFPI1	Tissue factor pathway inhibitor	0.000112	0.245206	8	15328
Q969H0	FBXW7_HUMAN	FBXW7	F-box/WD repeat-containing protein 7	0.00011185	0.311041	16	34722
P23769	GATA2_HUMAN	GATA2	Endothelial transcription factor GATA-2	0.00011181	0.319414	19	36956
P33076	C2TA_HUMAN	C2TA	MHC class II transactivator	0.00011155	0.291544	8	20160
P30279	CCND2_HUMAN	CCND2	G1/S-specific cyclin-D2	0.0001113	0.298167	14	29974
P11234	RALB_HUMAN	RALB	Ras-related protein Ral-B	0.00011128	0.279774	5	23098
Q9UM11	FZR_HUMAN	FZR	Fizzy-related protein homolog	0.00011127	0.27603	10	15284
P08637	FCG3A_HUMAN	FCG3A	Low affinity immunoglobulin gamma Fc region receptor III-A	0.00011126	0.297374	10	19348
P98172	EFNB1_HUMAN	EFNB1	Ephrin-B1	0.00011109	0.310985	13	26024
P41250	SYG_HUMAN	SYG	Glycyl-tRNA synthetase	0.00011098	0.311097	8	32760
O43559	FRS3_HUMAN	FRS3	Fibroblast growth factor receptor substrate 3	0.00011096	0.316699	8	22382
P16298	PP2BB_HUMAN	PP2BB	Serine/threonine-protein phosphatase 2B catalytic subunit beta isoform	0.00011076	0.301829	7	14326
Q15370	ELOB_HUMAN	ELOB	Transcription elongation factor B polypeptide 2	0.00011046	0.301252	9	21672
Q9H3D4	P63_HUMAN	P63	Tumor protein 63	0.00011022	0.325934	12	30564
P48730	KC1D_HUMAN	KC1D	Casein kinase I isoform delta	0.00010995	0.307372	11	20322
P78314	3BP2_HUMAN	3BP2	SH3 domain-binding protein 2	0.00010975	0.329216	19	36954
P42356	PI4KA_HUMAN	PI4KA	Phosphatidylinositol 4-kinase alpha	0.00010973	0.294143	9	21288
Q96QU8	XPO6_HUMAN	XPO6	Exportin-6	0.00010902	0.310623	9	23040
P02533	K1C14_HUMAN	K1C14	Keratin, type I cytoskeletal 14	0.000109	0.305582	7	24630
O14495	LPP3_HUMAN	LPP3	Lipid phosphate phosphohydrolase 3	0.0001087	0.293918	7	17528
Q15121	PEA15_HUMAN	PEA15	Astrocytic phosphoprotein PEA-15	0.00010853	0.315086	12	25920
Q01826	SATB1_HUMAN	SATB1	DNA-binding protein SATB1	0.00010846	0.290055	10	19708
P01266	THYG_HUMAN	THYG	Thyroglobulin	0.00010814	0.285915	8	11438
P51148	RAB5C_HUMAN	RAB5C	Ras-related protein Rab-5C	0.00010784	0.305018	7	42340
Q13618	CUL3_HUMAN	CUL3	Cullin-3	0.00010758	0.315	30	30170
P10911	MCF2_HUMAN	MCF2	Proto-oncogene DBL	0.00010758	0.287099	10	17318
Q01469	FABP5_HUMAN	FABP5	Fatty acid-binding protein, epidermal	0.00010712	0.304803	10	37336
Q03001	BPA1_HUMAN	BPA1	Bullous pemphigoid antigen 1, isoforms 1/2/3/4/5/8	0.00010705	0.30233	6	25202
Q07343	PDE4B_HUMAN	PDE4B	cAMP-specific 3',5'-cyclic phosphodiesterase 4B	0.00010652	0.279661	5	9874
P22888	LSHR_HUMAN	LSHR	Lutropin-choriogonadotropic hormone receptor	0.00010611	0.279955	9	16482
Q01362	FCERB_HUMAN	FCERB	High affinity immunoglobulin epsilon receptor subunit beta	0.00010564	0.306963	6	22776
P10070	GLI2_HUMAN	GLI2	Zinc finger protein GLI2	0.00010408	0.26254	5	20296
O14497	ARI1A_HUMAN	ARI1A	AT-rich interactive domain-containing protein 1A	0.00010357	0.279526	8	20910
Q13164	MK07_HUMAN	MK07	Mitogen-activated protein kinase 7	0.00010316	0.302779	12	18878
Q9BUN8	DERL1_HUMAN	DERL1	Derlin-1	0.00010295	0.282788	5	13748
P53539	FOSB_HUMAN	FOSB	Protein fosB	0.00010255	0.291103	10	22186
P61313	RL15_HUMAN	RL15	60S ribosomal protein L15	0.00010228	0.320477	48	53170
P16591	FER_HUMAN	FER	Proto-oncogene tyrosine-protein kinase FER	0.00010162	0.321966	17	30664
P62318	SMD3_HUMAN	SMD3	Small nuclear ribonucleoprotein Sm D3	0.00010093	0.295977	16	26810
Q9Y2U5	M3K2_HUMAN	M3K2	Mitogen-activated protein kinase kinase kinase 2	0.00010036	0.312472	15	22970
Q71UM5	RS27L_HUMAN	RS27L	40S ribosomal protein S27-like protein	0.00010027	0.317104	36	37866
P07360	CO8G_HUMAN	CO8G	Complement component C8 gamma chain	9.99e-05	0.23966	3	18556
O00743	PPP6_HUMAN	PPP6	Serine/threonine-protein phosphatase 6	9.974e-05	0.309486	13	31290
Q9H0E2	TOLIP_HUMAN	TOLIP	Toll-interacting protein	9.966e-05	0.28295	11	13030
Q92888	ARHG1_HUMAN	ARHG1	Rho guanine nucleotide exchange factor 1	9.961e-05	0.303921	12	20416
P02788	TRFL_HUMAN	TRFL	Lactotransferrin	9.885e-05	0.270492	5	9816
Q9NYA1	SPHK1_HUMAN	SPHK1	Sphingosine kinase 1	9.879e-05	0.309596	5	24182
P61962	WDR68_HUMAN	WDR68	WD repeat-containing protein 68	9.874e-05	0.28839	6	17210
P0C0L4	CO4A_HUMAN	CO4A	Complement C4-A	9.836e-05	0.250434	4	9712
Q9H5V8	CDCP1_HUMAN	CDCP1	CUB domain-containing protein 1	9.792e-05	0.313546	5	23314
O43521	BIM_HUMAN	BIM	Bcl-2-like protein 11	9.787e-05	0.301488	14	21712
P12544	GRAA_HUMAN	GRAA	Granzyme A	9.736e-05	0.300052	10	31826
O15392	BIRC5_HUMAN	BIRC5	Baculoviral IAP repeat-containing protein 5	9.618e-05	0.311349	14	21126
P12314	FCGR1_HUMAN	FCGR1	High affinity immunoglobulin gamma Fc receptor I	9.595e-05	0.294593	13	19992
Q14031	CO4A6_HUMAN	CO4A6	Collagen alpha-6(IV) chain	9.592e-05	0.281501	7	32618
P29400	CO4A5_HUMAN	CO4A5	Collagen alpha-5(IV) chain	9.592e-05	0.281501	7	32618
Q9UL18	I2C1_HUMAN	I2C1	Eukaryotic translation initiation factor 2C 1	9.561e-05	0.313235	60	36198
P49454	CENPF_HUMAN	CENPF	Centromere protein F	9.559e-05	0.281296	5	11590
Q96HC4	PDLI5_HUMAN	PDLI5	PDZ and LIM domain protein 5	9.536e-05	0.29809	7	16268
Q9NWQ8	PAG1_HUMAN	PAG1	Phosphoprotein associated with glycosphingolipid-enriched microdomains 1	9.513e-05	0.326333	15	30026
P08588	ADRB1_HUMAN	ADRB1	Beta-1 adrenergic receptor	9.469e-05	0.307508	6	20818
Q06546	GABPA_HUMAN	GABPA	GA-binding protein alpha chain	9.452e-05	0.28851	6	12860
P35070	BTC_HUMAN	BTC	ProbetacellulinBetacellulin	9.445e-05	0.294969	4	26950
P50579	AMPM2_HUMAN	AMPM2	Methionine aminopeptidase 2	9.434e-05	0.308549	8	19136
O00716	E2F3_HUMAN	E2F3	Transcription factor E2F3	9.429e-05	0.301409	12	19684
P00374	DYR_HUMAN	DYR	Dihydrofolate reductase	9.426e-05	0.285514	7	13564
Q15388	TOM20_HUMAN	TOM20	Mitochondrial import receptor subunit TOM20 homolog	9.397e-05	0.296179	5	18584
Q9NUP9	LIN7C_HUMAN	LIN7C	Lin-7 homolog C	9.342e-05	0.269818	4	13744
P55085	PAR2_HUMAN	PAR2	Proteinase-activated receptor 2	9.323e-05	0.288582	8	18640
Q86Y01	DTX1_HUMAN	DTX1	Protein deltex-1	9.275e-05	0.311097	8	17838
P11532	DMD_HUMAN	DMD	Dystrophin	9.26e-05	0.298887	10	15074
Q15464	SHB_HUMAN	SHB	SH2 domain-containing adapter protein B	9.23e-05	0.326794	19	29588
P35348	ADA1A_HUMAN	ADA1A	Alpha-1A adrenergic receptor	9.229e-05	0.269168	7	13020
P14868	SYDC_HUMAN	SYDC	Aspartyl-tRNA synthetase, cytoplasmic	9.222e-05	0.325138	9	21166
Q99814	EPAS1_HUMAN	EPAS1	Endothelial PAS domain-containing protein 1	9.219e-05	0.304214	9	19310
Q8TDN4	CABL1_HUMAN	CABL1	CDK5 and ABL1 enzyme substrate 1	9.203e-05	0.307781	8	19264
O15511	ARPC5_HUMAN	ARPC5	Actin-related protein 2/3 complex subunit 5	9.187e-05	0.316092	11	21522
O14492	SH2B2_HUMAN	SH2B2	SH2B adapter protein 2	9.17e-05	0.328841	18	37196
Q13523	PRP4B_HUMAN	PRP4B	Serine/threonine-protein kinase PRP4 homolog	9.168e-05	0.293818	5	14390
Q01892	SPIB_HUMAN	SPIB	Transcription factor Spi-B	9.158e-05	0.306773	16	25096
Q15672	TWST1_HUMAN	TWST1	Twist-related protein 1	9.149e-05	0.290688	10	19558
P63211	GBG1_HUMAN	GBG1	Guanine nucleotide-binding protein G(T) subunit gamma-T1	9.098e-05	0.253067	17	12296
P21781	FGF7_HUMAN	FGF7	Keratinocyte growth factor	9.092e-05	0.272149	9	13732
Q92729	PTPRU_HUMAN	PTPRU	Receptor-type tyrosine-protein phosphatase U	9.058e-05	0.299585	8	23530
O15160	RPAC1_HUMAN	RPAC1	DNA-directed RNA polymerases I and III subunit RPAC1	8.949e-05	0.31589	43	39572
P30542	AA1R_HUMAN	AA1R	Adenosine receptor A1	8.928e-05	0.273589	7	13236
P14314	GLU2B_HUMAN	GLU2B	Glucosidase 2 subunit beta	8.861e-05	0.307781	7	20266
P15884	ITF2_HUMAN	ITF2	Transcription factor 4	8.86e-05	0.30979	13	20870
Q16570	DUFFY_HUMAN	DUFFY	Duffy antigen/chemokine receptor	8.845e-05	0.241379	8	15184
P24522	GA45A_HUMAN	GA45A	Growth arrest and DNA-damage-inducible protein GADD45 alpha	8.844e-05	0.310567	18	22294
Q92583	CCL17_HUMAN	CCL17	C-C motif chemokine 17	8.815e-05	0.228607	6	19052
P35638	DDIT3_HUMAN	DDIT3	DNA damage-inducible transcript 3	8.809e-05	0.296053	18	24246
Q13838	UAP56_HUMAN	UAP56	Spliceosome RNA helicase BAT1	8.728e-05	0.31315	9	19574
P13725	ONCM_HUMAN	ONCM	Oncostatin-M	8.705e-05	0.261037	9	14824
Q96J84	KIRR1_HUMAN	KIRR1	Kin of IRRE-like protein 1	8.652e-05	0.294093	4	17584
O15126	SCAM1_HUMAN	SCAM1	Secretory carrier-associated membrane protein 1	8.647e-05	0.305556	7	16674
P15509	CSF2R_HUMAN	CSF2R	Granulocyte-macrophage colony-stimulating factor receptor subunit alpha	8.645e-05	0.306366	10	22276
P50591	TNF10_HUMAN	TNF10	Tumor necrosis factor ligand superfamily member 10	8.625e-05	0.275898	11	12858
Q16513	PKN2_HUMAN	PKN2	Serine/threonine-protein kinase N2	8.6e-05	0.306909	10	17914
Q14444	CAPR1_HUMAN	CAPR1	Caprin-1	8.593e-05	0.300833	10	16650
P24723	KPCL_HUMAN	KPCL	Protein kinase C eta type	8.541e-05	0.316381	11	19868
O60232	SSA27_HUMAN	SSA27	Sjoegren syndrome/scleroderma autoantigen 1	8.492e-05	0.291544	10	12778
Q13568	IRF5_HUMAN	IRF5	Interferon regulatory factor 5	8.488e-05	0.306122	9	25038
P52952	NKX25_HUMAN	NKX25	Homeobox protein Nkx-2.5	8.461e-05	0.278896	4	10706
Q99523	SORT_HUMAN	SORT	Sortilin	8.454e-05	0.27838	6	11780
P49327	FAS_HUMAN	FAS	Fatty acid synthase[Acyl-carrier-protein] S-acetyltransferase[Acyl-carrier-protein] S-malonyltransferase3-oxoacyl-[acyl-carrier-protein] synthase3-oxoacyl-[acyl-carrier-protein] reductase3-hydroxypalmitoyl-[acyl-carrier-protein] dehydrataseEnoyl-[acyl-carrier-protein] reductaseOleoyl-[acyl-carrier-protein] hydrolase	8.434e-05	0.31589	11	20946
P05452	TETN_HUMAN	TETN	Tetranectin	8.427e-05	0.272085	7	12150
P29966	MARCS_HUMAN	MARCS	Myristoylated alanine-rich C-kinase substrate	8.41e-05	0.306691	6	23942
Q13255	GRM1_HUMAN	GRM1	Metabotropic glutamate receptor 1	8.406e-05	0.304723	9	17034
P36507	MP2K2_HUMAN	MP2K2	Dual specificity mitogen-activated protein kinase kinase 2	8.396e-05	0.302435	14	18330
O60239	3BP5_HUMAN	3BP5	SH3 domain-binding protein 5	8.354e-05	0.295346	7	12068
Q07866	KLC1_HUMAN	KLC1	Kinesin light chain 1	8.341e-05	0.303309	9	24390
Q9NRY4	GRLF1_HUMAN	GRLF1	Glucocorticoid receptor DNA-binding factor 1	8.293e-05	0.315948	5	22592
Q13261	I15RA_HUMAN	I15RA	Interleukin-15 receptor subunit alphaSoluble interleukin-15 receptor subunit alpha	8.288e-05	0.285514	6	13180
Q15759	MK11_HUMAN	MK11	Mitogen-activated protein kinase 11	8.284e-05	0.304669	15	22524
Q13003	GRIK3_HUMAN	GRIK3	Glutamate receptor, ionotropic kainate 3	8.253e-05	0.279977	4	14258
Q02535	ID3_HUMAN	ID3	DNA-binding protein inhibitor ID-3	8.25e-05	0.29517	15	18428
Q14831	GRM7_HUMAN	GRM7	Metabotropic glutamate receptor 7	8.231e-05	0.308439	6	26696
Q06710	PAX8_HUMAN	PAX8	Paired box protein Pax-8	8.227e-05	0.288126	5	12516
P29508	SPB3_HUMAN	SPB3	Serpin B3	8.132e-05	0.267155	5	13256
P08620	FGF4_HUMAN	FGF4	Fibroblast growth factor 4	8.126e-05	0.269022	7	14058
Q9NZH6	IL1F7_HUMAN	IL1F7	Interleukin-1 family member 7	8.117e-05	0.275986	2	10806
Q12852	M3K12_HUMAN	M3K12	Mitogen-activated protein kinase kinase kinase 12	8.101e-05	0.259609	6	14982
P42167	LAP2B_HUMAN	LAP2B	Lamina-associated polypeptide 2, isoforms beta/gamma	8.067e-05	0.325474	9	22276
Q9UII4	HERC5_HUMAN	HERC5	Probable E3 ubiquitin-protein ligase HERC5	8.052e-05	0.305286	26	19732
O00585	CCL21_HUMAN	CCL21	C-C motif chemokine 21	8.048e-05	0.250162	7	11586
P61812	TGFB2_HUMAN	TGFB2	Transforming growth factor beta-2	8.047e-05	0.283459	11	17038
Q9Y6Q6	TNR11_HUMAN	TNR11	Tumor necrosis factor receptor superfamily member 11A	8.025e-05	0.318416	13	22180
P13796	PLSL_HUMAN	PLSL	Plastin-2	7.999e-05	0.273697	6	7926
Q9UI95	MD2L2_HUMAN	MD2L2	Mitotic spindle assembly checkpoint protein MAD2B	7.966e-05	0.280249	9	11408
Q15583	TGIF1_HUMAN	TGIF1	Homeobox protein TGIF1	7.923e-05	0.320063	12	25784
Q9BXH1	BBC3_HUMAN	BBC3	Bcl-2-binding component 3	7.915e-05	0.294268	7	13120
Q9ULH1	DDEF1_HUMAN	DDEF1	130 kDa phosphatidylinositol 4,5-biphosphate-dependent ARF1 GTPase-activating protein	7.913e-05	0.333237	17	27222
P19634	SL9A1_HUMAN	SL9A1	Sodium/hydrogen exchanger 1	7.87e-05	0.30932	8	20866
P08519	APOA_HUMAN	APOA	Apolipoprotein(a)	7.846e-05	0.266949	4	9678
Q9UNQ2	DIMT1_HUMAN	DIMT1	Probable dimethyladenosine transferase	7.825e-05	0.312444	41	22070
P02775	CXCL7_HUMAN	CXCL7	Platelet basic protein	7.805e-05	0.26398	7	8282
Q96J02	ITCH_HUMAN	ITCH	E3 ubiquitin-protein ligase Itchy homolog	7.798e-05	0.294643	12	13116
P78357	CNTP1_HUMAN	CNTP1	Contactin-associated protein 1	7.762e-05	0.322506	10	21674
Q96GD4	AURKB_HUMAN	AURKB	Serine/threonine-protein kinase 12	7.748e-05	0.294869	9	11944
Q9HBW0	LPAR2_HUMAN	LPAR2	Lysophosphatidic acid receptor 2	7.725e-05	0.27658	4	8042
Q92747	ARC1A_HUMAN	ARC1A	Actin-related protein 2/3 complex subunit 1A	7.717e-05	0.295069	2	6498
P05204	HMGN2_HUMAN	HMGN2	Non-histone chromosomal protein HMG-17	7.69e-05	0.323711	9	32914
Q86X55	CARM1_HUMAN	CARM1	Histone-arginine methyltransferase CARM1	7.686e-05	0.306502	10	15774
Q9UBC3	DNM3B_HUMAN	DNM3B	DNA (cytosine-5)-methyltransferase 3B	7.669e-05	0.287934	11	13370
Q14254	FLOT2_HUMAN	FLOT2	Flotillin-2	7.655e-05	0.304883	6	17700
Q7Z6Z7	HUWE1_HUMAN	HUWE1	E3 ubiquitin-protein ligase HUWE1	7.644e-05	0.296306	7	13902
Q9NZJ5	E2AK3_HUMAN	E2AK3	Eukaryotic translation initiation factor 2-alpha kinase 3	7.627e-05	0.30233	9	16458
P61201	CSN2_HUMAN	CSN2	COP9 signalosome complex subunit 2	7.588e-05	0.30569	11	16772
Q13239	SLAP1_HUMAN	SLAP1	SRC-like-adapter	7.562e-05	0.306014	13	17000
Q9Y4K4	M4K5_HUMAN	M4K5	Mitogen-activated protein kinase kinase kinase kinase 5	7.553e-05	0.319708	9	31140
P37288	V1AR_HUMAN	V1AR	Vasopressin V1a receptor	7.54e-05	0.279638	3	18902
P47901	V1BR_HUMAN	V1BR	Vasopressin V1b receptor	7.54e-05	0.279638	3	18902
P05114	HMGN1_HUMAN	HMGN1	Non-histone chromosomal protein HMG-14	7.515e-05	0.314742	11	20150
P31995	FCG2C_HUMAN	FCG2C	Low affinity immunoglobulin gamma Fc region receptor II-c	7.512e-05	0.318738	7	19564
O14798	TR10C_HUMAN	TR10C	Tumor necrosis factor receptor superfamily member 10C	7.481e-05	0.269482	5	9042
Q99075	HBEGF_HUMAN	HBEGF	Proheparin-binding EGF-like growth factorHeparin-binding EGF-like growth factor	7.478e-05	0.303442	9	16402
Q9UIV8	SPB13_HUMAN	SPB13	Serpin B13	7.462e-05	0.265477	8	10926
P42701	I12R1_HUMAN	I12R1	Interleukin-12 receptor beta-1 chain	7.46e-05	0.234232	6	12956
P28562	DUS1_HUMAN	DUS1	Dual specificity protein phosphatase 1	7.437e-05	0.303734	12	17866
P35869	AHR_HUMAN	AHR	Aryl hydrocarbon receptor	7.377e-05	0.326948	17	28084
Q13163	MP2K5_HUMAN	MP2K5	Dual specificity mitogen-activated protein kinase kinase 5	7.369e-05	0.317279	9	15748
Q8WWW0	RASF5_HUMAN	RASF5	Ras association domain-containing protein 5	7.341e-05	0.278671	16	14698
P09496	CLCA_HUMAN	CLCA	Clathrin light chain A	7.335e-05	0.316467	7	23620
Q9P035	PTAD1_HUMAN	PTAD1	Protein tyrosine phosphatase-like protein PTPLAD1	7.308e-05	0.272641	6	14260
Q03013	GSTM4_HUMAN	GSTM4	Glutathione S-transferase Mu 4	7.24e-05	0.290031	7	11926
Q15080	NCF4_HUMAN	NCF4	Neutrophil cytosol factor 4	7.229e-05	0.292751	9	15018
O00139	KIF2A_HUMAN	KIF2A	Kinesin-like protein KIF2A	7.189e-05	0.302752	6	21754
Q9UDY8	MALT1_HUMAN	MALT1	Mucosa-associated lymphoid tissue lymphoma translocation protein 1	7.183e-05	0.306258	12	19524
P51946	CCNH_HUMAN	CCNH	Cyclin-H	7.156e-05	0.307726	11	15126
Q00978	IRF9_HUMAN	IRF9	Interferon regulatory factor 9	7.094e-05	0.276735	7	10076
P42166	LAP2A_HUMAN	LAP2A	Lamina-associated polypeptide 2, isoform alpha	7.089e-05	0.312556	8	21508
P58400	NRX1B_HUMAN	NRX1B	Neurexin-1-beta	7.066e-05	0.248726	4	18198
Q9Y4C0	NRX3A_HUMAN	NRX3A	Neurexin-3-alpha	7.066e-05	0.248726	4	18198
Q9P2S2	NRX2A_HUMAN	NRX2A	Neurexin-2-alpha	7.066e-05	0.248726	4	18198
O60262	GBG7_HUMAN	GBG7	Guanine nucleotide-binding protein G(I)/G(S)/G(O) subunit gamma-7	7.009e-05	0.25136	17	13136
P35228	NOS2_HUMAN	NOS2	Nitric oxide synthase, inducible	7.007e-05	0.314086	9	18148
Q02641	CACB1_HUMAN	CACB1	Voltage-dependent L-type calcium channel subunit beta-1	7.002e-05	0.267733	4	8294
P11586	C1TC_HUMAN	C1TC	C-1-tetrahydrofolate synthase, cytoplasmicMethylenetetrahydrofolate dehydrogenaseMethenyltetrahydrofolate cyclohydrolaseFormyltetrahydrofolate synthetase	6.999e-05	0.309596	10	27912
P28288	ABCD3_HUMAN	ABCD3	ATP-binding cassette sub-family D member 3	6.994e-05	0.247659	5	6690
Q14318	FKBP8_HUMAN	FKBP8	FK506-binding protein 8	6.975e-05	0.310012	9	19968
O00212	RHOD_HUMAN	RHOD	Rho-related GTP-binding protein RhoD	6.968e-05	0.290371	8	12648
P09564	CD7_HUMAN	CD7	T-cell antigen CD7	6.956e-05	0.285326	4	10018
Q13794	APR_HUMAN	APR	Phorbol-12-myristate-13-acetate-induced protein 1	6.94e-05	0.280794	7	10256
P53350	PLK1_HUMAN	PLK1	Serine/threonine-protein kinase PLK1	6.891e-05	0.313631	16	19990
O75899	GABR2_HUMAN	GABR2	Gamma-aminobutyric acid type B receptor subunit 2	6.879e-05	0.263018	6	13066
P53805	RCAN1_HUMAN	RCAN1	Calcipressin-1	6.875e-05	0.305125	8	13206
P51948	MAT1_HUMAN	MAT1	CDK-activating kinase assembly factor MAT1	6.807e-05	0.314685	14	17210
Q15436	SC23A_HUMAN	SC23A	Protein transport protein Sec23A	6.799e-05	0.268085	3	9624
P53365	ARFP2_HUMAN	ARFP2	Arfaptin-2	6.785e-05	0.279368	8	9956
P56279	TCL1A_HUMAN	TCL1A	T-cell leukemia/lymphoma protein 1A	6.778e-05	0.275459	7	11200
P50406	5HT6R_HUMAN	5HT6R	5-hydroxytryptamine receptor 6	6.748e-05	0.283343	3	13860
Q00005	2ABB_HUMAN	2ABB	Serine/threonine-protein phosphatase 2A 55 kDa regulatory subunit B beta isoform	6.744e-05	0.281273	6	9900
P00387	NB5R3_HUMAN	NB5R3	NADH-cytochrome b5 reductase 3	6.684e-05	0.253828	5	7406
P42338	PK3CB_HUMAN	PK3CB	Phosphatidylinositol-4,5-bisphosphate 3-kinase catalytic subunit beta isoform	6.6e-05	0.308439	7	13776
P49190	PTH2R_HUMAN	PTH2R	Parathyroid hormone 2 receptor	6.572e-05	0.268189	2	12556
O60664	M6PBP_HUMAN	M6PBP	Mannose-6-phosphate receptor-binding protein 1	6.57e-05	0.272556	5	7820
Q9H0R4	HDHD2_HUMAN	HDHD2	Haloacid dehalogenase-like hydrolase domain-containing protein 2	6.544e-05	0.26619	6	8706
Q9NRQ2	PLS4_HUMAN	PLS4	Phospholipid scramblase 4	6.539e-05	0.287266	6	11934
P08574	CY1_HUMAN	CY1	Cytochrome c1, heme protein, mitochondrial	6.507e-05	0.243945	8	15776
Q06330	SUH_HUMAN	SUH	Recombining binding protein suppressor of hairless	6.48e-05	0.280931	8	9772
Q9HC77	CENPJ_HUMAN	CENPJ	Centromere protein J	6.472e-05	0.311797	6	17750
Q6R327	RICTR_HUMAN	RICTR	Rapamycin-insensitive companion of mTOR	6.461e-05	0.283227	5	9490
Q12913	PTPRJ_HUMAN	PTPRJ	Receptor-type tyrosine-protein phosphatase eta	6.441e-05	0.311405	12	14828
Q99741	CDC6_HUMAN	CDC6	Cell division control protein 6 homolog	6.433e-05	0.293371	10	12726
O60610	DIAP1_HUMAN	DIAP1	Protein diaphanous homolog 1	6.42e-05	0.281524	7	9004
P38484	INGR2_HUMAN	INGR2	Interferon-gamma receptor beta chain	6.38e-05	0.284296	4	12128
P13807	GYS1_HUMAN	GYS1	Glycogen [starch] synthase, muscle	6.348e-05	0.297374	5	12198
P01033	TIMP1_HUMAN	TIMP1	Metalloproteinase inhibitor 1	6.317e-05	0.265782	6	8892
Q96PM5	ZN363_HUMAN	ZN363	RING finger and CHY zinc finger domain-containing protein 1	6.278e-05	0.305906	6	12428
P63098	CANB1_HUMAN	CANB1	Calcineurin subunit B type 1	6.263e-05	0.2928	8	11098
O00300	TR11B_HUMAN	TR11B	Tumor necrosis factor receptor superfamily member 11B	6.255e-05	0.272042	5	6788
O60934	NBN_HUMAN	NBN	Nibrin	6.25e-05	0.294718	15	12680
O14763	TR10B_HUMAN	TR10B	Tumor necrosis factor receptor superfamily member 10B	6.204e-05	0.308686	18	17880
P55084	ECHB_HUMAN	ECHB	Trifunctional enzyme subunit beta, mitochondrial	6.193e-05	0.322116	7	31560
P30203	CD6_HUMAN	CD6	T-cell differentiation antigen CD6	6.179e-05	0.283366	4	7034
P54652	HSP72_HUMAN	HSP72	Heat shock-related 70 kDa protein 2	6.164e-05	0.311713	11	17484
P18146	EGR1_HUMAN	EGR1	Early growth response protein 1	6.162e-05	0.315804	11	17456
Q9Y698	CCG2_HUMAN	CCG2	Voltage-dependent calcium channel gamma-2 subunit	6.135e-05	0.283459	7	8450
P49427	UB2R1_HUMAN	UB2R1	Ubiquitin-conjugating enzyme E2 R1	6.13e-05	0.301095	15	13172
Q9H3M7	TXNIP_HUMAN	TXNIP	Thioredoxin-interacting protein	6.129e-05	0.280249	5	11282
O43293	DAPK3_HUMAN	DAPK3	Death-associated protein kinase 3	6.064e-05	0.312303	9	11282
P62736	ACTA_HUMAN	ACTA	Actin, aortic smooth muscle	6.049e-05	0.302303	8	11246
P51671	CCL11_HUMAN	CCL11	Eotaxin	6.045e-05	0.249137	8	24828
P23526	SAHH_HUMAN	SAHH	Adenosylhomocysteinase	6.041e-05	0.303974	8	24660
P43119	PI2R_HUMAN	PI2R	Prostacyclin receptor	6.023e-05	0.282996	5	17148
Q9UNN5	FAF1_HUMAN	FAF1	FAS-associated factor 1	5.998e-05	0.308741	14	15008
P15151	PVR_HUMAN	PVR	Poliovirus receptor	5.991e-05	0.268044	7	10064
P08729	K2C7_HUMAN	K2C7	Keratin, type II cytoskeletal 7	5.986e-05	0.311825	5	11624
P03971	MIS_HUMAN	MIS	Muellerian-inhibiting factor	5.98e-05	0.289885	2	7938
Q13554	KCC2B_HUMAN	KCC2B	Calcium/calmodulin-dependent protein kinase type II beta chain	5.939e-05	0.295977	13	14362
P15692	VEGFA_HUMAN	VEGFA	Vascular endothelial growth factor A	5.919e-05	0.266497	9	9572
P12318	FCG2A_HUMAN	FCG2A	Low affinity immunoglobulin gamma Fc region receptor II-a	5.889e-05	0.307508	9	15646
P49918	CDN1C_HUMAN	CDN1C	Cyclin-dependent kinase inhibitor 1C	5.877e-05	0.288919	11	12320
P13224	GP1BB_HUMAN	GP1BB	Platelet glycoprotein Ib beta chain	5.87e-05	0.293619	5	8934
Q9UL54	TAOK2_HUMAN	TAOK2	Serine/threonine-protein kinase TAO2	5.841e-05	0.310623	6	10436
P20290	BTF3_HUMAN	BTF3	Transcription factor BTF3	5.811e-05	0.31054	8	35932
Q9UKT9	IKZF3_HUMAN	IKZF3	Zinc finger protein Aiolos	5.785e-05	0.296737	12	12782
O75293	GA45B_HUMAN	GA45B	Growth arrest and DNA-damage-inducible protein GADD45 beta	5.775e-05	0.305421	14	15136
O75569	PRKRA_HUMAN	PRKRA	Interferon-inducible double stranded RNA-dependent protein kinase activator A	5.771e-05	0.298836	11	12344
Q9NYL9	TMOD3_HUMAN	TMOD3	Tropomodulin-3	5.765e-05	0.317919	5	33868
O43597	SPY2_HUMAN	SPY2	Protein sprouty homolog 2	5.714e-05	0.316814	9	23760
Q05329	DCE2_HUMAN	DCE2	Glutamate decarboxylase 2	5.684e-05	0.280408	6	6006
P78344	IF4G2_HUMAN	IF4G2	Eukaryotic translation initiation factor 4 gamma 2	5.676e-05	0.283784	8	9286
O60784	TOM1_HUMAN	TOM1	Target of Myb protein 1	5.662e-05	0.27232	5	6938
P02461	CO3A1_HUMAN	CO3A1	Collagen alpha-1(III) chain	5.644e-05	0.270978	8	9808
Q9H1D9	RPC6_HUMAN	RPC6	DNA-directed RNA polymerase III subunit RPC6	5.644e-05	0.266129	4	7626
P14735	IDE_HUMAN	IDE	Insulin-degrading enzyme	5.643e-05	0.292924	5	10838
Q92529	SHC3_HUMAN	SHC3	SHC-transforming protein 3	5.637e-05	0.317715	12	17678
P01374	TNFB_HUMAN	TNFB	Lymphotoxin-alpha	5.612e-05	0.294043	10	15744
O43776	SYNC_HUMAN	SYNC	Asparaginyl-tRNA synthetase, cytoplasmic	5.593e-05	0.290396	3	8124
P61204	ARF3_HUMAN	ARF3	ADP-ribosylation factor 3	5.586e-05	0.260683	6	6052
Q14683	SMC1A_HUMAN	SMC1A	Structural maintenance of chromosomes protein 1A	5.577e-05	0.293619	10	10762
P01350	GAST_HUMAN	GAST	GastrinGastrin-71	5.575e-05	0.268438	3	9264
P41134	ID1_HUMAN	ID1	DNA-binding protein inhibitor ID-1	5.539e-05	0.291569	9	11612
Q13885	TBB2A_HUMAN	TBB2A	Tubulin beta-2A chain	5.535e-05	0.296331	8	9446
Q9UKV0	HDAC9_HUMAN	HDAC9	Histone deacetylase 9	5.495e-05	0.290785	10	10780
P08476	INHBA_HUMAN	INHBA	Inhibin beta A chain	5.49e-05	0.243911	10	15066
P58546	MTPN_HUMAN	MTPN	Myotrophin	5.48e-05	0.305933	9	38808
P19544	WT1_HUMAN	WT1	Wilms tumor protein	5.441e-05	0.320804	8	19816
Q01081	U2AF1_HUMAN	U2AF1	Splicing factor U2AF 35 kDa subunit	5.434e-05	0.28791	9	10698
P20674	COX5A_HUMAN	COX5A	Cytochrome c oxidase subunit 5A, mitochondrial	5.423e-05	0.267568	4	4252
Q14449	GRB14_HUMAN	GRB14	Growth factor receptor-bound protein 14	5.394e-05	0.311041	11	15184
Q68CZ2	TENS3_HUMAN	TENS3	Tensin-3	5.379e-05	0.275022	4	8388
O43541	SMAD6_HUMAN	SMAD6	Mothers against decapentaplegic homolog 6	5.356e-05	0.294193	11	12228
P25815	S100P_HUMAN	S100P	Protein S100-P	5.348e-05	0.280749	7	9048
P49798	RGS4_HUMAN	RGS4	Regulator of G-protein signaling 4	5.334e-05	0.285044	7	9494
Q9H2X0	CHRD_HUMAN	CHRD	Chordin	5.328e-05	0.308466	4	11440
Q7KZI7	MARK2_HUMAN	MARK2	Serine/threonine-protein kinase MARK2	5.315e-05	0.308329	9	11206
P02763	A1AG1_HUMAN	A1AG1	Alpha-1-acid glycoprotein 1	5.313e-05	0.266764	3	6332
P78504	JAG1_HUMAN	JAG1	Protein jagged-1	5.312e-05	0.269064	4	7086
P46939	UTRO_HUMAN	UTRO	Utrophin	5.305e-05	0.28875	8	7018
P16109	LYAM3_HUMAN	LYAM3	P-selectin	5.266e-05	0.272448	6	10486
Q9ULB1	NRX1A_HUMAN	NRX1A	Neurexin-1-alpha	5.257e-05	0.239743	4	8640
P42263	GRIA3_HUMAN	GRIA3	Glutamate receptor 3	5.227e-05	0.280181	6	8008
O43684	BUB3_HUMAN	BUB3	Mitotic checkpoint protein BUB3	5.187e-05	0.301173	7	13294
P22459	KCNA4_HUMAN	KCNA4	Potassium voltage-gated channel subfamily A member 4	5.183e-05	0.26394	5	6168
P35318	ADML_HUMAN	ADML	ADMAdrenomedullinProadrenomedullin N-20 terminal peptide	5.166e-05	0.266518	6	6002
Q14451	GRB7_HUMAN	GRB7	Growth factor receptor-bound protein 7	5.128e-05	0.326887	15	21178
P36544	ACHA7_HUMAN	ACHA7	Neuronal acetylcholine receptor subunit alpha-7	5.112e-05	0.3012	4	8280
Q9H6Q3	SLAP2_HUMAN	SLAP2	Src-like-adapter 2	5.08e-05	0.291005	5	9536
Q15025	TNIP1_HUMAN	TNIP1	TNFAIP3-interacting protein 1	5.078e-05	0.309679	12	12460
P02538	K2C6A_HUMAN	K2C6A	Keratin, type II cytoskeletal 6A	5.077e-05	0.298604	5	11310
P20340	RAB6A_HUMAN	RAB6A	Ras-related protein Rab-6A	5.075e-05	0.277889	5	5930
Q9NPB9	CCRL1_HUMAN	CCRL1	C-C chemokine receptor type 11	5.051e-05	0.238161	10	13498
P43628	KI2L3_HUMAN	KI2L3	Killer cell immunoglobulin-like receptor 2DL3	5.046e-05	0.290152	4	11324
Q08828	ADCY1_HUMAN	ADCY1	Adenylate cyclase type 1	5.01e-05	0.26406	2	11866
P08134	RHOC_HUMAN	RHOC	Rho-related GTP-binding protein RhoC	4.992e-05	0.296509	6	15846
P09529	INHBB_HUMAN	INHBB	Inhibin beta B chain	4.99e-05	0.24297	9	13514
Q99731	CCL19_HUMAN	CCL19	C-C motif chemokine 19	4.983e-05	0.239064	8	7060
P51668	UB2D1_HUMAN	UB2D1	Ubiquitin-conjugating enzyme E2 D1	4.977e-05	0.277778	4	7528
Q99569	PKP4_HUMAN	PKP4	Plakophilin-4	4.935e-05	0.291128	9	7710
Q92628	K0232_HUMAN	K0232	Uncharacterized protein KIAA0232	4.926e-05	0.250199	2	3894
Q9NVZ3	NECP2_HUMAN	NECP2	Adaptin ear-binding coat-associated protein 2	4.924e-05	0.284319	5	6568
P55316	FOXG1_HUMAN	FOXG1	Forkhead box protein G1	4.921e-05	0.299197	10	10152
P32519	ELF1_HUMAN	ELF1	ETS-related transcription factor Elf-1	4.919e-05	0.299378	10	12492
P05305	EDN1_HUMAN	EDN1	Endothelin-1	4.899e-05	0.265091	5	8678
Q9BXR5	TLR10_HUMAN	TLR10	Toll-like receptor 10	4.883e-05	0.288798	6	8880
O60711	LPXN_HUMAN	LPXN	Leupaxin	4.877e-05	0.273762	5	8458
Q15118	PDK1_HUMAN	PDK1	[Pyruvate dehydrogenase [lipoamide]] kinase isozyme 1, mitochondrial	4.865e-05	0.287671	10	8560
Q9Y294	ASF1A_HUMAN	ASF1A	Histone chaperone ASF1A	4.861e-05	0.27603	8	11318
P12081	SYHC_HUMAN	SYHC	Histidyl-tRNA synthetase, cytoplasmic	4.856e-05	0.319856	25	18242
P31146	COR1A_HUMAN	COR1A	Coronin-1A	4.855e-05	0.280431	3	8008
P08183	MDR1_HUMAN	MDR1	Multidrug resistance protein 1	4.854e-05	0.27361	2	5942
Q14457	BECN1_HUMAN	BECN1	Beclin-1	4.846e-05	0.273179	5	6884
P01589	IL2RA_HUMAN	IL2RA	Interleukin-2 receptor alpha chain	4.843e-05	0.298655	9	11292
P55010	IF5_HUMAN	IF5	Eukaryotic translation initiation factor 5	4.837e-05	0.295926	8	8514
Q9NRP7	STK36_HUMAN	STK36	Serine/threonine-protein kinase 36	4.835e-05	0.254014	5	7176
P07101	TY3H_HUMAN	TY3H	Tyrosine 3-monooxygenase	4.809e-05	0.312162	8	15440
Q15382	RHEB_HUMAN	RHEB	GTP-binding protein Rheb	4.796e-05	0.300833	10	8580
Q9NYQ7	CELR3_HUMAN	CELR3	Cadherin EGF LAG seven-pass G-type receptor 3	4.796e-05	0.310846	5	9256
P19878	NCF2_HUMAN	NCF2	Neutrophil cytosol factor 2	4.779e-05	0.291642	9	9604
P98177	FOXO4_HUMAN	FOXO4	Forkhead box protein O4	4.763e-05	0.320893	10	19214
P40197	GPV_HUMAN	GPV	Platelet glycoprotein V	4.763e-05	0.285985	5	9726
P60903	S10AA_HUMAN	S10AA	Protein S100-A10	4.734e-05	0.285726	8	6780
Q8N4C6	NIN_HUMAN	NIN	Ninein	4.72e-05	0.297476	9	9630
Q92569	P55G_HUMAN	P55G	Phosphatidylinositol 3-kinase regulatory subunit gamma	4.7e-05	0.314771	14	18348
P28702	RXRB_HUMAN	RXRB	Retinoic acid receptor RXR-beta	4.684e-05	0.278986	16	9862
P14209	CD99_HUMAN	CD99	CD99 antigen	4.641e-05	0.285068	4	14642
P68402	PA1B2_HUMAN	PA1B2	Platelet-activating factor acetylhydrolase IB subunit beta	4.604e-05	0.291814	5	9978
Q9NZM3	ITSN2_HUMAN	ITSN2	Intersectin-2	4.587e-05	0.26149	3	6380
P81274	GPSM2_HUMAN	GPSM2	G-protein-signaling modulator 2	4.578e-05	0.283135	7	9312
Q9UKL0	RCOR1_HUMAN	RCOR1	REST corepressor 1	4.564e-05	0.287743	12	10058
Q9NR96	TLR9_HUMAN	TLR9	Toll-like receptor 9	4.56e-05	0.286222	6	8356
P57740	NU107_HUMAN	NU107	Nuclear pore complex protein Nup107	4.552e-05	0.250832	4	6268
P52566	GDIR2_HUMAN	GDIR2	Rho GDP-dissociation inhibitor 2	4.55e-05	0.301908	8	11456
P20396	TRH_HUMAN	TRH	ProthyroliberinThyroliberin	4.533e-05	0.273416	3	10484
Q8IVT5	KSR1_HUMAN	KSR1	Kinase suppressor of Ras 1	4.521e-05	0.280567	4	14238
Q9Y2Z0	SUGT1_HUMAN	SUGT1	Suppressor of G2 allele of SKP1 homolog	4.513e-05	0.294793	7	8458
O43823	AKAP8_HUMAN	AKAP8	A-kinase anchor protein 8	4.502e-05	0.30759	8	12336
Q8N3X1	FNBP4_HUMAN	FNBP4	Formin-binding protein 4	4.471e-05	0.290981	4	7230
Q96BD5	PF21A_HUMAN	PF21A	PHD finger protein 21A	4.467e-05	0.277289	5	7150
P22004	BMP6_HUMAN	BMP6	Bone morphogenetic protein 6	4.419e-05	0.265762	7	8858
Q13952	NFYC_HUMAN	NFYC	Nuclear transcription factor Y subunit gamma	4.412e-05	0.291152	6	9904
Q13324	CRFR2_HUMAN	CRFR2	Corticotropin-releasing factor receptor 2	4.403e-05	0.179879	5	8590
Q9BY44	EIF2A_HUMAN	EIF2A	Eukaryotic translation initiation factor 2A	4.401e-05	0.311797	25	7820
O15066	KIF3B_HUMAN	KIF3B	Kinesin-like protein KIF3B	4.366e-05	0.267712	7	5450
P49069	CAMLG_HUMAN	CAMLG	Calcium signal-modulating cyclophilin ligand	4.339e-05	0.292825	3	6474
O60831	PRAF2_HUMAN	PRAF2	PRA1 family protein 2	4.292e-05	0.262262	5	4796
P51511	MMP15_HUMAN	MMP15	Matrix metalloproteinase-15	4.292e-05	0.256135	2	5068
P05120	PAI2_HUMAN	PAI2	Plasminogen activator inhibitor 2	4.285e-05	0.273222	5	6434
P41231	P2RY2_HUMAN	P2RY2	P2Y purinoceptor 2	4.282e-05	0.301069	7	11644
P25103	NK1R_HUMAN	NK1R	Substance-P receptor	4.254e-05	0.235027	3	4998
O15143	ARC1B_HUMAN	ARC1B	Actin-related protein 2/3 complex subunit 1B	4.243e-05	0.296458	10	8050
O75494	FUSIP_HUMAN	FUSIP	FUS-interacting serine-arginine-rich protein 1	4.242e-05	0.312528	5	14504
Q9Y5X5	NPFF2_HUMAN	NPFF2	Neuropeptide FF receptor 2	4.236e-05	0.181129	3	3202
Q02556	IRF8_HUMAN	IRF8	Interferon regulatory factor 8	4.217e-05	0.285655	5	3908
P35626	ARBK2_HUMAN	ARBK2	Beta-adrenergic receptor kinase 2	4.201e-05	0.273632	7	10156
Q07890	SOS2_HUMAN	SOS2	Son of sevenless homolog 2	4.195e-05	0.332183	16	17714
Q8N4C8	MINK1_HUMAN	MINK1	Misshapen-like kinase 1	4.18e-05	0.300755	6	8636
P10914	IRF1_HUMAN	IRF1	Interferon regulatory factor 1	4.173e-05	0.30262	8	11072
P53355	DAPK1_HUMAN	DAPK1	Death-associated protein kinase 1	4.171e-05	0.307808	11	14090
Q92738	US6NL_HUMAN	US6NL	USP6 N-terminal-like protein	4.15e-05	0.305798	5	8288
P00540	MOS_HUMAN	MOS	Proto-oncogene serine/threonine-protein kinase mos	4.134e-05	0.29845	4	9272
O75592	MYCB2_HUMAN	MYCB2	Probable E3 ubiquitin-protein ligase MYCBP2	4.113e-05	0.305206	5	11162
Q15363	TMED2_HUMAN	TMED2	Transmembrane emp24 domain-containing protein 2	4.113e-05	0.26619	6	6134
P39060	COIA1_HUMAN	COIA1	Collagen alpha-1(XVIII) chainEndostatin	4.102e-05	0.273287	5	6248
P49639	HXA1_HUMAN	HXA1	Homeobox protein Hox-A1	4.099e-05	0.272448	5	6406
Q9BZS1	FOXP3_HUMAN	FOXP3	Forkhead box protein P3	4.091e-05	0.243192	2	6826
P53007	TXTP_HUMAN	TXTP	Tricarboxylate transport protein, mitochondrial	4.073e-05	0.297911	5	13364
P00492	HPRT_HUMAN	HPRT	Hypoxanthine-guanine phosphoribosyltransferase	4.039e-05	0.295321	9	28572
Q15582	BGH3_HUMAN	BGH3	Transforming growth factor-beta-induced protein ig-h3	4.027e-05	0.264302	8	5394
Q9P209	CEP72_HUMAN	CEP72	Centrosomal protein of 72 kDa	4.024e-05	0.26396	3	3712
P08172	ACM2_HUMAN	ACM2	Muscarinic acetylcholine receptor M2	4.022e-05	0.252	7	4056
O60331	PI51C_HUMAN	PI51C	Phosphatidylinositol-4-phosphate 5-kinase type-1 gamma	4.013e-05	0.271297	3	4416
Q14764	MVP_HUMAN	MVP	Major vault protein	4.009e-05	0.311881	6	12590
P48436	SOX9_HUMAN	SOX9	Transcription factor SOX-9	4.002e-05	0.302541	6	13034
P18433	PTPRA_HUMAN	PTPRA	Receptor-type tyrosine-protein phosphatase alpha	3.993e-05	0.318885	9	9014
P53420	CO4A4_HUMAN	CO4A4	Collagen alpha-4(IV) chain	3.985e-05	0.263719	7	11046
P04085	PDGFA_HUMAN	PDGFA	Platelet-derived growth factor subunit A	3.984e-05	0.28125	7	7054
Q9Y6W5	WASF2_HUMAN	WASF2	Wiskott-Aldrich syndrome protein family member 2	3.961e-05	0.28481	7	7348
P01243	CSH_HUMAN	CSH	Chorionic somatomammotropin hormone	3.947e-05	0.29174	6	7506
Q15011	HERP1_HUMAN	HERP1	Homocysteine-responsive endoplasmic reticulum-resident ubiquitin-like domain member 1 protein	3.925e-05	0.251597	2	4956
Q13772	NCOA4_HUMAN	NCOA4	Nuclear receptor coactivator 4	3.918e-05	0.295876	7	8052
P48443	RXRG_HUMAN	RXRG	Retinoic acid receptor RXR-gamma	3.913e-05	0.285115	13	8896
Q9Y243	AKT3_HUMAN	AKT3	RAC-gamma serine/threonine-protein kinase	3.903e-05	0.298552	7	8678
Q96B36	AKTS1_HUMAN	AKTS1	Proline-rich AKT1 substrate 1	3.892e-05	0.302251	6	11484
P06734	FCER2_HUMAN	FCER2	Low affinity immunoglobulin epsilon Fc receptor	3.888e-05	0.288943	6	7292
P69892	HBG2_HUMAN	HBG2	Hemoglobin subunit gamma-2	3.865e-05	0.237834	5	3424
Q9ULV8	CBLC_HUMAN	CBLC	Signal transduction protein CBL-C	3.838e-05	0.325536	10	12082
O75531	BAF_HUMAN	BAF	Barrier-to-autointegration factor	3.833e-05	0.294293	8	6554
P43235	CATK_HUMAN	CATK	Cathepsin K	3.829e-05	0.252754	7	4742
Q9P286	PAK7_HUMAN	PAK7	Serine/threonine-protein kinase PAK 7	3.828e-05	0.294193	9	6936
P04053	TDT_HUMAN	TDT	DNA nucleotidylexotransferase	3.823e-05	0.26406	2	5578
Q9ULJ8	NEB1_HUMAN	NEB1	Neurabin-1	3.819e-05	0.292652	9	6494
Q13492	PICAL_HUMAN	PICAL	Phosphatidylinositol-binding clathrin assembly protein	3.812e-05	0.300546	6	9026
Q9Y6K1	DNM3A_HUMAN	DNM3A	DNA (cytosine-5)-methyltransferase 3A	3.79e-05	0.296585	11	9512
P49758	RGS6_HUMAN	RGS6	Regulator of G-protein signaling 6	3.764e-05	0.241986	2	5456
P21728	DRD1_HUMAN	DRD1	D(1A) dopamine receptor	3.753e-05	0.283668	5	5860
P24071	FCAR_HUMAN	FCAR	Immunoglobulin alpha Fc receptor	3.734e-05	0.274847	7	5876
P19404	NDUV2_HUMAN	NDUV2	NADH dehydrogenase [ubiquinone] flavoprotein 2, mitochondrial	3.728e-05	0.258409	4	7360
Q13291	SLAF1_HUMAN	SLAF1	Signaling lymphocytic activation molecule	3.719e-05	0.294343	9	6598
P06858	LIPL_HUMAN	LIPL	Lipoprotein lipase	3.71e-05	0.282097	7	5154
Q99755	PI51A_HUMAN	PI51A	Phosphatidylinositol-4-phosphate 5-kinase type-1 alpha	3.709e-05	0.295472	7	8014
Q6DJT9	PLAG1_HUMAN	PLAG1	Zinc finger protein PLAG1	3.703e-05	0.285608	3	5400
Q9UMD9	COHA1_HUMAN	COHA1	Collagen alpha-1(XVII) chain	3.699e-05	0.287028	12	8054
Q15329	E2F5_HUMAN	E2F5	Transcription factor E2F5	3.685e-05	0.302435	10	9638
P16455	MGMT_HUMAN	MGMT	Methylated-DNA--protein-cysteine methyltransferase	3.669e-05	0.317017	7	20014
Q05682	CALD1_HUMAN	CALD1	Caldesmon	3.661e-05	0.32128	5	19206
Q9H0E9	BRD8_HUMAN	BRD8	Bromodomain-containing protein 8	3.642e-05	0.300416	9	7558
Q13017	RHG05_HUMAN	RHG05	Rho GTPase-activating protein 5	3.629e-05	0.297706	7	8076
P10826	RARB_HUMAN	RARB	Retinoic acid receptor beta	3.622e-05	0.281478	8	7360
O43424	GRID2_HUMAN	GRID2	Glutamate receptor delta-2 subunit	3.605e-05	0.262779	6	6172
O60437	PEPL_HUMAN	PEPL	Periplakin	3.602e-05	0.301987	6	7064
Q9NRY6	PLS3_HUMAN	PLS3	Phospholipid scramblase 3	3.585e-05	0.277001	3	9362
Q16643	DREB_HUMAN	DREB	Drebrin	3.579e-05	0.317162	6	19590
P28324	ELK4_HUMAN	ELK4	ETS domain-containing protein Elk-4	3.556e-05	0.293719	11	10174
O94763	RMP_HUMAN	RMP	Unconventional prefoldin RPB5 interactor	3.532e-05	0.293445	8	7178
P29320	EPHA3_HUMAN	EPHA3	Ephrin type-A receptor 3	3.531e-05	0.299119	7	5658
P18825	ADA2C_HUMAN	ADA2C	Alpha-2C adrenergic receptor	3.529e-05	0.290104	3	7582
Q9Y2R2	PTN22_HUMAN	PTN22	Tyrosine-protein phosphatase non-receptor type 22	3.521e-05	0.319237	12	10954
Q15417	CNN3_HUMAN	CNN3	Calponin-3	3.517e-05	0.278828	2	3512
P17927	CR1_HUMAN	CR1	Complement receptor type 1	3.515e-05	0.254293	6	4642
Q9NQB0	TF7L2_HUMAN	TF7L2	Transcription factor 7-like 2	3.491e-05	0.3068	9	10264
P61224	RAP1B_HUMAN	RAP1B	Ras-related protein Rap-1b	3.488e-05	0.293968	6	8768
Q9BPX3	CND3_HUMAN	CND3	Condensin complex subunit 3	3.481e-05	0.27007	4	3892
P05814	CASB_HUMAN	CASB	Beta-casein	3.475e-05	0.281707	3	5030
P02747	C1QC_HUMAN	C1QC	Complement C1q subcomponent subunit C	3.473e-05	0.234963	4	4338
P19387	RPB3_HUMAN	RPB3	DNA-directed RNA polymerase II subunit RPB3	3.454e-05	0.291814	8	6754
Q99650	OSMR_HUMAN	OSMR	Oncostatin-M specific receptor subunit beta	3.453e-05	0.284086	5	9432
O14617	AP3D1_HUMAN	AP3D1	AP-3 complex subunit delta-1	3.443e-05	0.294493	6	5970
P04141	CSF2_HUMAN	CSF2	Granulocyte-macrophage colony-stimulating factor	3.426e-05	0.267114	9	5116
P61296	HAND2_HUMAN	HAND2	Heart- and neural crest derivatives-expressed protein 2	3.42e-05	0.313008	7	12290
Q99500	S1PR3_HUMAN	S1PR3	Sphingosine 1-phosphate receptor 3	3.407e-05	0.257315	4	6344
Q9Y463	DYR1B_HUMAN	DYR1B	Dual specificity tyrosine-phosphorylation-regulated kinase 1B	3.39e-05	0.294043	8	6198
P54764	EPHA4_HUMAN	EPHA4	Ephrin type-A receptor 4	3.365e-05	0.285608	8	6958
Q15836	VAMP3_HUMAN	VAMP3	Vesicle-associated membrane protein 3	3.344e-05	0.237248	6	5500
P57087	JAM2_HUMAN	JAM2	Junctional adhesion molecule B	3.343e-05	0.274499	5	4404
O75914	PAK3_HUMAN	PAK3	Serine/threonine-protein kinase PAK 3	3.335e-05	0.310234	12	9508
Q6WCQ1	MPRIP_HUMAN	MPRIP	Myosin phosphatase Rho-interacting protein	3.334e-05	0.325842	11	26410
P29401	TKT_HUMAN	TKT	Transketolase	3.322e-05	0.299792	7	19934
O95352	ATG7_HUMAN	ATG7	Autophagy-related protein 7	3.318e-05	0.247801	3	5264
P48169	GBRA4_HUMAN	GBRA4	Gamma-aminobutyric acid receptor subunit alpha-4	3.315e-05	0.254536	8	8812
P54762	EPHB1_HUMAN	EPHB1	Ephrin type-B receptor 1	3.313e-05	0.309568	10	7058
Q9HCE1	MOV10_HUMAN	MOV10	Putative helicase MOV-10	3.287e-05	0.305987	40	7086
Q9Y496	KIF3A_HUMAN	KIF3A	Kinesin-like protein KIF3A	3.276e-05	0.280408	5	5454
Q92847	GHSR_HUMAN	GHSR	Growth hormone secretagogue receptor type 1	3.266e-05	0.198283	2	1772
Q9BVA0	KTNB1_HUMAN	KTNB1	Katanin p80 WD40-containing subunit B1	3.252e-05	0.256857	4	3240
O00291	HIP1_HUMAN	HIP1	Huntingtin-interacting protein 1	3.242e-05	0.298193	10	6520
P13489	RINI_HUMAN	RINI	Ribonuclease inhibitor	3.233e-05	0.269461	4	3254
P51959	CCNG1_HUMAN	CCNG1	Cyclin-G1	3.232e-05	0.30039	9	6040
Q13797	ITA9_HUMAN	ITA9	Integrin alpha-9	3.227e-05	0.285444	8	9352
P03952	KLKB1_HUMAN	KLKB1	Plasma kallikrein	3.211e-05	0.248726	5	3496
P41595	5HT2B_HUMAN	5HT2B	5-hydroxytryptamine receptor 2B	3.206e-05	0.256268	4	3440
P22362	CCL1_HUMAN	CCL1	C-C motif chemokine 1	3.204e-05	0.227571	2	16152
Q16787	LAMA3_HUMAN	LAMA3	Laminin subunit alpha-3	3.191e-05	0.257372	5	6088
Q14814	MEF2D_HUMAN	MEF2D	Myocyte-specific enhancer factor 2D	3.19e-05	0.299948	12	8976
P37023	ACVL1_HUMAN	ACVL1	Serine/threonine-protein kinase receptor R3	3.182e-05	0.271914	8	7494
P04216	THY1_HUMAN	THY1	Thy-1 membrane glycoprotein	3.176e-05	0.299094	7	6380
O00203	AP3B1_HUMAN	AP3B1	AP-3 complex subunit beta-1	3.164e-05	0.298167	7	7048
P78543	BTG2_HUMAN	BTG2	Protein BTG2	3.159e-05	0.291176	3	6428
Q9BXL7	CAR11_HUMAN	CAR11	Caspase recruitment domain-containing protein 11	3.113e-05	0.29863	8	7560
Q99835	SMO_HUMAN	SMO	Smoothened homolog	3.09e-05	0.245658	3	3140
[truncated: 1,468 more rows]

## Sheet: Table S17
MTX knock down
MTX targets
							#Supplementary sheets that include the MTX targets	#MTX targets in the references
Entry	Entry name	Status	Protein names	Gene names	Length	Cross-reference (HGNC)	Supplementary	Targets(in reference)	Reference
P19838	NFKB1_HUMAN	reviewed	Nuclear factor NF-kappa-B p105 subunit (DNA-binding factor KBF1) (EBP-1) (Nuclear factor of kappa light polypeptide gene enhancer in B-cells 1) [Cleaved into: Nuclear factor NF-kappa-B p50 subunit]	NFKB1	968	7794;	S3A,S3C,S3D,S3E,S6,S7,S8,S10	NFKbeta	Chan & Cronstein, 2002
Q00653	NFKB2_HUMAN	reviewed	Nuclear factor NF-kappa-B p100 subunit (DNA-binding factor KBF2) (H2TF1) (Lymphocyte translocation chromosome 10 protein) (Nuclear factor of kappa light polypeptide gene enhancer in B-cells 2) (Oncogene Lyt-10) (Lyt10) [Cleaved into: Nuclear factor NF-kappa-B p52 subunit]	NFKB2 LYT10	900	7795;	S3A,S3C,S3D,S3E,S6	NFKbeta	Chan & Cronstein, 2002
Q01201	RELB_HUMAN	reviewed	Transcription factor RelB (I-Rel)	RELB	579	9956;	S3A,S3C,S3D,S3E,S6,S8	NFKbeta	Chan & Cronstein, 2002
Q04864	REL_HUMAN	reviewed	Proto-oncogene c-Rel	REL	619	9954;	S1,S3A,S3C,S3E,S6	NFKbeta	Chan & Cronstein, 2002
Q04206	TF65_HUMAN	reviewed	Transcription factor p65 (Nuclear factor NF-kappa-B p65 subunit) (Nuclear factor of kappa light polypeptide gene enhancer in B-cells 3)	RELA NFKB3	551	9955;	S3A,S3C,S3D,S3E,S6,S8,S10	NFKbeta	Chan & Cronstein, 2002
P29459	IL12A_HUMAN	reviewed	Interleukin-12 subunit alpha (IL-12A) (Cytotoxic lymphocyte maturation factor 35 kDa subunit) (CLMF p35) (IL-12 subunit p35) (NK cell stimulatory factor chain 1) (NKSF1)	IL12A NKSF1	219	5969;	S3A,S3B,S3C,S3D,S3E,S11	IL-12	Chan & Cronstein, 2002
P29460	IL12B_HUMAN	reviewed	Interleukin-12 subunit beta (IL-12B) (Cytotoxic lymphocyte maturation factor 40 kDa subunit) (CLMF p40) (IL-12 subunit p40) (NK cell stimulatory factor chain 2) (NKSF2)	IL12B NKSF2	328	5970;	S3A,S3B,S3C,S3D,S3E,S9A,S11,S13	IL-12	Chan & Cronstein, 2002
P05362	ICAM1_HUMAN	reviewed	Intercellular adhesion molecule 1 (ICAM-1) (Major group rhinovirus receptor) (CD antigen CD54)	ICAM1	532	5344;	S3A,S3C,S3E,S7,S8	ICAM-1	Chan & Cronstein, 2002
P10147	CCL3_HUMAN	reviewed	C-C motif chemokine 3 (G0/G1 switch regulatory protein 19-1) (Macrophage inflammatory protein 1-alpha) (MIP-1-alpha) (PAT 464.1) (SIS-beta) (Small-inducible cytokine A3) (Tonsillar lymphocyte LD78 alpha protein) [Cleaved into: MIP-1-alpha(4-69) (LD78-alpha(4-69))]	CCL3 G0S19-1 MIP1A SCYA3	92	10627;	S3A,S3B,S3C,S3D,S3E	MIP-1alpha	Chan & Cronstein, 2002
P16581	LYAM2_HUMAN	reviewed	E-selectin (CD62 antigen-like family member E) (Endothelial leukocyte adhesion molecule 1) (ELAM-1) (Leukocyte-endothelial cell adhesion molecule 2) (LECAM2) (CD antigen CD62E)	SELE ELAM1	610	10718;	S3A, S3C,S8	E-selectin	Chan & Cronstein, 2002
P35354	PGH2_HUMAN	reviewed	Prostaglandin G/H synthase 2 (EC 1.14.99.1) (Cyclooxygenase-2) (COX-2) (PHS II) (Prostaglandin H2 synthase 2) (PGH synthase 2) (PGHS-2) (Prostaglandin-endoperoxide synthase 2)	PTGS2 COX2	604	9605;	S1,S3A,S3C,S3E,S7,S8	COX-2	Chan & Cronstein, 2002
P08246	ELNE_HUMAN	reviewed	Neutrophil elastase (EC 3.4.21.37) (Bone marrow serine protease) (Elastase-2) (Human leukocyte elastase) (HLE) (Medullasin) (PMN elastase)	ELANE ELA2	267	3309;	S3A,S8	TNF induced elastase	Chan & Cronstein, 2002
P01375	TNFA_HUMAN	reviewed	Tumor necrosis factor (Cachectin) (TNF-alpha) (Tumor necrosis factor ligand superfamily member 2) (TNF-a) [Cleaved into: Tumor necrosis factor, membrane form (N-terminal fragment) (NTF); Intracellular domain 1 (ICD1); Intracellular domain 2 (ICD2); C-domain 1; C-domain 2; Tumor necrosis factor, soluble form]	TNF TNFA TNFSF2	233	11892;	S1,S3,S3A,S3B,S3C,S3D,S3E,S7,S8,S9A,S10,S11	TNF alpha	Cutolo et al., 2001
P03956	MMP1_HUMAN	reviewed	Interstitial collagenase (EC 3.4.24.7) (Fibroblast collagenase) (Matrix metalloproteinase-1) (MMP-1) [Cleaved into: 22 kDa interstitial collagenase; 27 kDa interstitial collagenase]	MMP1 CLG	469	7155;	S1,S3E,S8	MMP-1	Cutolo et al., 2001
P01579	IFNG_HUMAN	reviewed	Interferon gamma (IFN-gamma) (Immune interferon)	IFNG	166	5438;	S3A,S3B,S3C,S3D,S3E,S8,S9A,S11,S13	IFN-gamma	Cutolo et al., 2001
P01583	IL1A_HUMAN	reviewed	Interleukin-1 alpha (IL-1 alpha) (Hematopoietin-1)	IL1A IL1F1	271	5991;	S1,S3,S3A,S3B,S3C,S3D,S3E,S7,S8,S9A,S11	IL-1	Chan & Cronstein, 2002; Cutolo et al., 2001
P60568	IL2_HUMAN	reviewed	Interleukin-2 (IL-2) (T-cell growth factor) (TCGF) (Aldesleukin)	IL2	153	6001;	S1,S3A,S3B,S3C,S3D,S3E,S8	IL-2	Chan & Cronstein, 2002; Cutolo et al., 2001
P01584	IL1B_HUMAN	reviewed	Interleukin-1 beta (IL-1 beta) (Catabolin)	IL1B IL1F2	269	5992;	S3,S3A,S3B,S3C,S3D,S3E,S8,S9A,S10,S11,S13	IL-1	Chan & Cronstein, 2002; Cutolo et al., 2001
P05231	IL6_HUMAN	reviewed	Interleukin-6 (IL-6) (B-cell stimulatory factor 2) (BSF-2) (CTL differentiation factor) (CDF) (Hybridoma growth factor) (Interferon beta-2) (IFN-beta-2)	IL6 IFNB2	212	6018;	S1,S2,S3,S3A,S3B,S3C,S3D,S3E,S8,S9A,S10,S11,S13	IL-6	Chan & Cronstein, 2002; Cutolo et al., 2001
P10145	IL8_HUMAN	reviewed	Interleukin-8 (IL-8) (C-X-C motif chemokine 8) (Emoctakin) (Granulocyte chemotactic protein 1) (GCP-1) (Monocyte-derived neutrophil chemotactic factor) (MDNCF) (Monocyte-derived neutrophil-activating peptide) (MONAP) (Neutrophil-activating protein 1) (NAP-1) (Protein 3-10C) (T-cell chemotactic factor) [Cleaved into: MDNCF-a (GCP/IL-8 protein IV) (IL8/NAP1 form I); Interleukin-8 ((Ala-IL-8)77) (GC…	IL8 CXCL8	99	6025;	S3A.S3B,S3C,S3D,S3E,S8,S10,S11,S13	IL-8	Chan & Cronstein, 2002; Cutolo et al., 2001
MTX knock down - proteins with significant changes in centrality (betweenness and stress)
BC_Stress_Ajusted p≤0.05	BC_Stress_Adjusted p≤0.01	BC_Single p_Ajusted p≤0.05	ID	UniprotID	betweenness(Before)	betweenness(After)	BetweennessDiff	Single p-value	Adjusted p-value	stress(Before)	stress(After)	StressDiff	Single p-value	Adjusted p-value	closeness(Before)	closeness(After)	ClosenessDiff	Single p-value	Adjusted p-value
VHL	VHL		VHL	P40337	0.0133512	0.0136427	0.00029155	0.0692771	0.00766993	2530406	2506706	-23700	0.493467	0.00799636	0.344639	0.344579	-5.991e-05	0.415415	0.045805
TRAF6	TRAF6		TRAF6	Q9Y4K3	0.0314007	0.0321308	0.00073016	0.0571142	0.000876663	5909712	5910582	870	0.0501505	0.00100654	0.381734	0.381554	-0.0001799	0.489447	0.0044639
STAT3	STAT3		STAT3	P40763	0.014129	0.0141391	1.015e-05	0.277387	0.00704316	2787752	2695208	-92544	0.0924623	0.00751438	0.379352	0.377661	-0.00169113	0.232628	0.00590385
SRC	SRC		SRC	P12931	0.0329844	0.0337485	0.00076411	0.0661986	0.000598357	6299676	6304270	4594	0.061245	0.000598911	0.408416	0.408401	-1.527e-05	0.340361	0.000326429
SMAD3	SMAD3	SMAD3	SMAD3	P84022	0.0123077	0.0132147	0.00090694	0.0100604	0.00826944	2495914	2586570	90656	0.00100402	0.00776835	0.380143	0.37987	-0.00027285	0.431156	0.00536144
PAXI	PAXI		PAXI	P49023	0.0138649	0.0141004	0.00023549	0.171	0.00710404	3089378	3049826	-39552	0.410282	0.00576546	0.383	0.382955	-4.484e-05	0.377756	0.00396266
P85A	P85A		P85A	P27986	0.0185011	0.0187602	0.00025903	0.226453	0.00375539	3473786	3459926	-13860	0.204819	0.00384306	0.387324	0.387264	-6.021e-05	0.401416	0.00255577
P53	P53		P53	P04637	0.025876	0.0264728	0.00059681	0.0554995	0.001464	4809294	4817402	8108	0.0452716	0.0014687	0.385257	0.385097	-0.0001595	0.450351	0.00307354
MYC	MYC	MYC	MYC	P01106	0.0190231	0.0195585	0.00053547	0.0370741	0.00301527	4045212	4051168	5956	0.0522613	0.0020749	0.367211	0.366638	-0.00057242	0.308853	0.0149804
MK01	MK01	MK01	MK01	P28482	0.0206136	0.0213261	0.00071252	0.0362173	0.00233661	4041186	4084732	43546	0.0343088	0.00205537	0.394063	0.394047	-1.652e-05	0.309476	0.00123179
LCK	LCK		LCK	P06239	0.0135797	0.0137751	0.00019542	0.224449	0.00749715	3004300	2976796	-27504	0.428285	0.00637021	0.387541	0.387394	-0.00014605	0.469	0.00248475
KPCA	KPCA		KPCA	P17252	0.0228827	0.0233288	0.00044618	0.118118	0.0020554	3846426	3847472	1046	0.116583	0.00316571	0.384615	0.384624	8.6e-06	0.301205	0.00331734
KAPCA	KAPCA		KAPCA	P17612	0.019375	0.0189874	-0.00038767	0.101508	0.00358927	3199652	3052864	-146788	0.0454087	0.00573922	0.369049	0.36656	-0.00248872	0.222892	0.0150931
IKKE	IKKE		IKKE	Q14164	0.0150727	0.0150971	2.439e-05	0.319879	0.00608764	3212328	3172800	-39528	0.468	0.00467436	0.367016	0.364967	-0.00204961	0.227364	0.0171372
HS90A	HS90A		HS90A	P07900	0.0189403	0.0192327	0.00029243	0.161647	0.00324023	3791390	3674040	-117350	0.0845921	0.00373809	0.396091	0.395632	-0.00045835	0.340704	0.000875213
GRB2	GRB2		GRB2	P62993	0.0799199	0.0810887	0.00116885	0.0998991	2.87e-05	13635364	13508280	-127084	0.279678	8.11e-05	0.416466	0.416455	-1.142e-05	0.295065	8.49e-05
GNAI2	GNAI2		GNAI2	P04899	0.0140643	0.0137778	-0.00028647	0.0927419	0.00749512	2645850	2527042	-118808	0.0503525	0.00785261	0.358659	0.358094	-0.00056447	0.279	0.0248837
FYN	FYN		FYN	P06241	0.024981	0.0253286	0.00034761	0.186117	0.00177623	4612334	4585876	-26458	0.209889	0.00180052	0.383934	0.383938	4.01e-06	0.308233	0.00367189
ESR1	ESR1	ESR1	ESR1	P03372	0.0149883	0.0154039	0.00041557	0.047047	0.00567308	3121916	3089520	-32396	0.485456	0.00534267	0.391172	0.390692	-0.00047942	0.363454	0.00202757
EP300	EP300	EP300	EP300	Q09472	0.011618	0.0122752	0.00065716	0.0160804	0.00896028	2404482	2450642	46160	0.0191339	0.00847048	0.371263	0.370546	-0.00071745	0.296371	0.011312
EGFR	EGFR		EGFR	P00533	0.0383407	0.0384077	6.699e-05	0.338338	0.000479207	7424684	7284894	-139790	0.224224	0.000516101	0.406404	0.405992	-0.00041196	0.381048	0.000631986
CTNB1	CTNB1		CTNB1	P35222	0.0165596	0.0167347	0.00017506	0.32032	0.00470278	3074294	3023572	-50722	0.316532	0.00596928	0.381482	0.381005	-0.0004768	0.361446	0.00488223
CFTR	CFTR		CFTR	P13569	0.0133747	0.0135591	0.00018435	0.187563	0.00776994	2443866	2399680	-44186	0.278953	0.00966947	0.34716	0.346871	-0.00028869	0.423541	0.0405227
CBP	CBP	CBP	CBP	Q92793	0.0145804	0.0154525	0.0008721	0.00802407	0.00561713	2894562	2934636	40074	0.0120724	0.00656586	0.367756	0.367264	-0.00049213	0.339376	0.0139205
CALM	CALM		CALM	P62158	0.0153084	0.0150145	-0.00029394	0.109879	0.00620448	3024890	2787996	-236894	0.0171544	0.00717527	0.365892	0.364156	-0.00173656	0.235592	0.0175837
BRCA1	BRCA1		BRCA1	P38398	0.012669	0.0127598	9.081e-05	0.473473	0.00851412	2431858	2354506	-77352	0.10241	0.0102468	0.372501	0.372068	-0.00043266	0.365095	0.0103248
ARRB2	ARRB2		ARRB2	P32121	0.017931	0.0183794	0.00044837	0.0663984	0.00400499	3965742	3952018	-13724	0.178068	0.00261462	0.374919	0.374864	-5.499e-05	0.346115	0.00858573
ARRB1	ARRB1		ARRB1	P49407	0.0169034	0.0173086	0.00040518	0.0682731	0.00435316	3411884	3400874	-11010	0.172691	0.00405417	0.375895	0.375887	-7.69e-06	0.309237	0.00736698
ACTB	ACTB		ACTB	P60709	0.0158115	0.0161416	0.00033003	0.0646465	0.00518605	2833810	2813004	-20806	0.325301	0.00703472	0.376508	0.376586	7.877e-05	0.241449	0.00637001
ABL1	ABL1		ABL1	P00519	0.016319	0.0166313	0.00031228	0.142285	0.00481527	3167914	3170704	2790	0.0993976	0.00469536	0.393795	0.394002	0.00020708	0.125125	0.00126426
1433Z	1433Z	1433Z	1433Z	P63104	0.0287235	0.0294961	0.00077264	0.0371859	0.00116888	5971328	5963438	-7890	0.0732197	0.000896034	0.393616	0.393867	0.00025077	0.0933735	0.00135268
1433G	1433G		1433G	P61981	0.0208305	0.0211666	0.00033609	0.132663	0.00236531	3966976	3932788	-34188	0.441	0.00280415	0.38144	0.381512	7.197e-05	0.243976	0.00451696
			2013-09-02	Q15019	0.00031402	0.00031702	3e-06	0.405	0.321875	79756	78728	-1028	0.283702	0.293197	0.308576	0.308257	-0.0003188	0.346386	0.23479
			2013-09-06	Q14141	2.4e-07	2.4e-07	0	0.628658	0.197941	70	70	0	0.840361	0.201479	0.246409	0.246403	-6.01e-06	0.35005	0.347691
1433B			1433B	P31946	0.00683261	0.00695568	0.00012307	0.139558	0.0218612	1423724	1415352	-8372	0.357503	0.020146	0.367913	0.36805	0.00013711	0.156156	0.0131581
1433T			1433T	P27348	0.00442132	0.00452418	0.00010286	0.141994	0.0329772	884782	885680	898	0.20603	0.0329115	0.355786	0.355836	4.982e-05	0.256281	0.0270293
			1A02	P01892	8.53e-06	8.64e-06	1.1e-07	0.310865	0.323344	3806	3772	-34	0.401804	0.380612	0.25764	0.257519	-0.00012089	0.44668	0.41025
			1A03	P04439	0	0	0	1	0.192146	0	0	0	1	0.192946	0.188859	0.188851	-8.12e-06	0.353769	0.18286
			1A11	P13746	0	0	0	1	0.192146	0	0	0	1	0.192946	0.223808	0.22371	-9.842e-05	0.45992	0.260645
			1A23	P30447	0	0	0	1	0.192146	0	0	0	1	0.192946	0.137125	0.137121	-3.99e-06	0.344032	0.0453186
			1A26	P30450	0.0005772	0.00058106	3.86e-06	0.235	0.248498	66222	64456	-1766	0.0592369	0.315585	0.158909	0.158903	-5.41e-06	0.347826	0.0878915
			1A30	P16188	0.00115407	0.00116178	7.71e-06	0.235707	0.137211	132440	128908	-3532	0.0502008	0.208708	0.1889	0.188893	-7.85e-06	0.347739	0.183209
			1A36	P30455	0	0	0	1	0.192146	0	0	0	1	0.192946	0.188859	0.188851	-8.12e-06	0.354774	0.18286
			1A66	P30457	0.00346395	0.00348709	2.314e-05	0.366197	0.0451855	397632	387034	-10598	0.0793173	0.0753231	0.232816	0.232804	-1.244e-05	0.347041	0.284759
			1A68	P01891	0.00148606	0.00150399	1.793e-05	0.259296	0.10455	289134	287152	-1982	0.426426	0.101286	0.313404	0.313479	7.456e-05	0.201605	0.188579
			1A74	P30459	0.00017558	0.00017711	1.53e-06	0.435743	0.392572	39852	39464	-388	0.366366	0.379427	0.273718	0.273631	-8.765e-05	0.481818	0.488683
			1B07	P01889	0.00093522	0.00095457	1.935e-05	0.145308	0.16219	181940	182166	226	0.164149	0.15314	0.29974	0.299617	-0.00012349	0.485972	0.297867
			1B08	P30460	0.00056307	0.00055825	-4.82e-06	0.109768	0.25945	104452	96672	-7780	0.0220884	0.258312	0.230309	0.23008	-0.00022886	0.339357	0.276625
			1B14	P30462	0	0	0	1	0.192146	0	0	0	1	0.192946	0.223808	0.22371	-9.842e-05	0.458291	0.260645
			1B27	P03989	0	0	0	1	0.192146	0	0	0	1	0.192946	0.223808	0.22371	-9.842e-05	0.458835	0.260645
			1B35	P30685	0	0	0	1	0.192146	0	0	0	1	0.192946	0.223808	0.22371	-9.842e-05	0.458918	0.260645
1B42			1B42	P30480	0.00789449	0.00812195	0.00022746	0.0983936	0.0171314	1720764	1725622	4858	0.135542	0.0147243	0.343955	0.343959	4.5e-06	0.297679	0.0468974
			1B44	P30481	0	0	0	1	0.192146	0	0	0	1	0.192946	0.188859	0.188851	-8.12e-06	0.353707	0.18286
			1B51	P18464	0.00030449	0.00030538	8.9e-07	0.205205	0.326088	53582	53040	-542	0.266332	0.341508	0.280794	0.280613	-0.00018109	0.412475	0.440741
			1B53	P30491	0	0	0	1	0.192146	0	0	0	1	0.192946	0.223808	0.22371	-9.842e-05	0.458669	0.260645
			1C04	P30504	0.00182939	0.00183641	7.02e-06	0.238477	0.0867067	341090	323694	-17396	0.0670671	0.0898859	0.298244	0.297854	-0.00039017	0.339679	0.311319
			1C08	P30505	0	0	0	1	0.192146	0	0	0	1	0.192946	0.223808	0.22371	-9.842e-05	0.46115	0.260645
			1C15	Q07000	0.00017521	0.00017155	-3.66e-06	0.0491968	0.397154	47054	43744	-3310	0.0413306	0.366765	0.278135	0.276933	-0.00120155	0.236236	0.466333
			1C17	Q95604	0.00026208	0.00025861	-3.47e-06	0.0513078	0.344407	69618	65502	-4116	0.0452716	0.313346	0.282281	0.281301	-0.00097998	0.246231	0.435109
			2A5G	Q13362	3.04e-05	3.406e-05	3.66e-06	0.01002	0.432243	12282	12884	602	0.0481444	0.497542	0.320181	0.320126	-5.462e-05	0.387879	0.146764
			2AAA	P30153	0.00238921	0.0024516	6.239e-05	0.108081	0.0637946	498152	492652	-5500	0.303607	0.060576	0.350035	0.349442	-0.00059374	0.317221	0.0363829
			2AAB	P30154	0.00068923	0.00061639	-7.284e-05	0.0283114	0.232134	136602	109682	-26920	0.0120482	0.234643	0.326118	0.321562	-0.00455562	0.214502	0.137286
			2ABA	P63151	0.00032823	0.00035066	2.243e-05	0.0210632	0.309624	58164	60766	2602	0.027027	0.324358	0.305529	0.30544	-8.891e-05	0.459296	0.256009
			2ABB	Q00005	6.744e-05	7.045e-05	3.01e-06	0.0866062	0.497006	9900	10080	180	0.0321285	0.475646	0.281273	0.280476	-0.00079695	0.248741	0.442005
			2ABD	Q66LE6	0	0	0	1	0.192146	0	0	0	1	0.192946	0.27064	0.269982	-0.00065773	0.273092	0.482145
			2ABG	Q9Y2T4	1.56e-05	1.674e-05	1.14e-06	0.0482412	0.369555	4562	4846	284	0.0342397	0.401393	0.275964	0.275404	-0.00055962	0.305918	0.477381
			2B11	P04229	0.00032628	0.00032869	2.41e-06	0.172691	0.31654	154808	152298	-2510	0.259036	0.180938	0.201841	0.201759	-8.224e-05	0.440882	0.221857
			2B14	P13760	0	0	0	1	0.192146	0	0	0	1	0.192946	0.201794	0.201711	-8.252e-05	0.431727	0.22151
			2B1A	Q30167	0	0	0	1	0.192146	0	0	0	1	0.192946	0.201794	0.201711	-8.252e-05	0.434171	0.22151
			2B1B	P20039	0	0	0	1	0.192146	0	0	0	1	0.192946	0.201794	0.201711	-8.252e-05	0.4333	0.22151
			2B51	Q30154	0	0	0	1	0.192146	0	0	0	1	0.192946	0.201794	0.201711	-8.252e-05	0.430584	0.22151
			2DMA	P28067	0.00079287	0.00079941	6.54e-06	0.139839	0.186099	182488	180274	-2214	0.377377	0.155083	0.239395	0.239344	-5.12e-05	0.452621	0.312818
			2DMB	P28068	2.73e-06	2.76e-06	3e-08	0.34739	0.259635	316	308	-8	0.133803	0.234432	0.240291	0.240229	-6.234e-05	0.473948	0.318323
			2DOA	P06340	0	0	0	1	0.192146	0	0	0	1	0.192946	0.193165	0.193132	-3.327e-05	0.454637	0.200154
			2DOB	P13765	0	0	0	1	0.192146	0	0	0	1	0.192946	0.239726	0.23966	-6.582e-05	0.488488	0.314198
2DRA			2DRA	P01903	0.00394052	0.00396564	2.512e-05	0.449799	0.0406413	936634	917484	-19150	0.226226	0.0319388	0.252791	0.252661	-0.0001296	0.427996	0.384887
			3BP2	P78314	0.00010975	0.00011126	1.51e-06	0.429146	0.448927	36954	36956	2	0.338338	0.387384	0.329216	0.329315	9.881e-05	0.182182	0.0968396
			3BP5	O60239	8.354e-05	8.547e-05	1.93e-06	0.250752	0.475466	12068	12090	22	0.381143	0.490779	0.295346	0.29502	-0.00032592	0.337349	0.331047
			4EBP1	Q13541	0.00025881	0.00027764	1.883e-05	0.0383065	0.337131	47570	49226	1656	0.0240964	0.351524	0.309928	0.310034	0.00010579	0.135952	0.218923
			4F2	P08195	0.00231801	0.00255609	0.00023808	0.00100503	0.0618482	352714	360238	7524	0.0130785	0.0809136	0.311825	0.311324	-0.00050088	0.268072	0.207866
			5HT1A	P08908	0.00108603	0.00111096	2.493e-05	0.0281407	0.143669	199044	205816	6772	0.021148	0.135295	0.255644	0.253554	-0.00208976	0.231388	0.388367
			5HT1B	P28222	0	0	0	1	0.192146	0	0	0	1	0.192946	0.20362	0.202292	-0.00132781	0.236473	0.22366
			5HT1D	P28221	0.00015407	0.00013987	-1.42e-05	0.0290873	0.420853	45214	41082	-4132	0.0442656	0.374455	0.240291	0.236694	-0.00359755	0.219219	0.299908
			5HT1F	P30939	0	0	0	1	0.192146	0	0	0	1	0.192946	0.273114	0.273023	-9.129e-05	0.464859	0.495213
			5HT2A	P28223	0.00065738	0.00066062	3.24e-06	0.149194	0.218648	104178	101738	-2440	0.041958	0.250172	0.28474	0.284627	-0.00011244	0.492958	0.408365
			5HT2B	P41595	3.206e-05	3.314e-05	1.08e-06	0.134403	0.429583	3440	3438	-2	0.480323	0.372607	0.256268	0.256254	-1.431e-05	0.359719	0.402933
			5HT2C	P28335	1.85e-05	1.873e-05	2.3e-07	0.439074	0.379132	2334	2332	-2	0.441441	0.340721	0.246304	0.246262	-4.195e-05	0.406219	0.346369
			5HT4R	Q13639	1.584e-05	1.511e-05	-7.3e-07	0.0512563	0.360581	2802	2692	-110	0.0951904	0.353211	0.281113	0.28059	-0.00052289	0.274194	0.440979
			5HT6R	P50406	6.748e-05	6.871e-05	1.23e-06	0.308853	0.499234	13860	14014	154	0.18018	0.494138	0.283343	0.283339	-4.05e-06	0.318273	0.417286
			5NTD	P21589	2.795e-05	2.848e-05	5.3e-07	0.355197	0.416382	7520	7550	30	0.252769	0.44465	0.285962	0.285999	3.73e-05	0.254271	0.397426
			A1AG1	P02763	5.313e-05	5.73e-05	4.17e-06	0.0411234	0.484329	6332	6268	-64	0.256307	0.42369	0.266764	0.266532	-0.00023174	0.365191	0.456906
			A2MG	P01023	0.00188306	0.00180488	-7.818e-05	0.0556117	0.087572	238184	221732	-16452	0.0655242	0.12522	0.300599	0.299539	-0.00105982	0.246727	0.298273
A4			A4	P05067	0.0110095	0.0111892	0.00017977	0.180723	0.0104857	1961872	1943548	-18324	0.448241	0.011868	0.363208	0.363004	-0.00020396	0.467337	0.0196121
			AA1R	P30542	8.928e-05	8.932e-05	4e-08	0.156942	0.47061	13236	12944	-292	0.109218	0.498073	0.273589	0.273305	-0.00028388	0.338042	0.491937
			AA2AR	P29274	2.975e-05	3.021e-05	4.6e-07	0.325277	0.421037	3874	3858	-16	0.442327	0.384035	0.268168	0.268089	-7.868e-05	0.492477	0.467524
			AA2BR	P29275	1.086e-05	1.092e-05	6e-08	0.23023	0.336955	1800	1808	8	0.276104	0.320302	0.278358	0.278299	-5.913e-05	0.444333	0.45692
AAKB1			AAKB1	Q9Y478	0.00390777	0.00400686	9.909e-05	0.0692771	0.0401366	848500	843112	-5388	0.383534	0.0355323	0.321012	0.320753	-0.00025871	0.403226	0.143237
			AAKB2	O43741	5.62e-06	5.77e-06	1.5e-07	0.155936	0.302587	1298	1300	2	0.26004	0.298752	0.250996	0.250911	-8.481e-05	0.496	0.375777
			AAKG1	P54619	1.313e-05	1.345e-05	3.2e-07	0.144299	0.351421	2290	2298	8	0.215075	0.339643	0.252477	0.252402	-7.586e-05	0.48345	0.383576
			AAKG2	Q9UGJ0	0	0	0	1	0.192146	0	0	0	1	0.192946	0.243056	0.242908	-0.00014801	0.406848	0.330305
			AAKG3	Q9UGI9	0	0	0	1	0.192146	0	0	0	1	0.192946	0.238949	0.238912	-3.74e-05	0.440763	0.311425
			AAPK1	Q13131	0.00122111	0.00123542	1.431e-05	0.208417	0.126889	180110	174066	-6044	0.0846774	0.161775	0.313944	0.313879	-6.475e-05	0.444109	0.185189
			AAPK2	P54646	0.00071594	0.00072664	1.07e-05	0.0751503	0.202964	102808	101350	-1458	0.222668	0.251031	0.276426	0.276466	3.985e-05	0.238431	0.470077
			ABC3G	Q9HC16	3.96e-06	4.86e-06	9e-07	0.00601805	0.292509	1446	1588	142	0.0391174	0.311814	0.280045	0.279111	-0.000934	0.245984	0.452333
			ABCD3	P28288	6.994e-05	7.17e-05	1.76e-06	0.0743719	0.494667	6690	6652	-38	0.43	0.430694	0.247659	0.247555	-0.00010455	0.447236	0.35475
			ABCE1	P61221	0	0	0	1	0.192146	0	0	0	1	0.192946	0.21761	0.217312	-0.00029805	0.284708	0.25179
			ABCF1	Q8NE71	3.62e-06	4.61e-06	9.9e-07	0.00807265	0.28889	558	660	102	0.0091001	0.262772	0.259182	0.257693	-0.00148909	0.228141	0.411538
			ABCG2	Q9UNQ0	0	0	0	1	0.192146	0	0	0	1	0.192946	0.23455	0.234469	-8.086e-05	0.454454	0.290485
			ABI1	Q8IZP0	0.00019189	0.00019494	3.05e-06	0.315895	0.380361	41536	40940	-596	0.146586	0.374895	0.312444	0.31237	-7.41e-05	0.461384	0.197887
			ABL2	P42684	0.00011374	0.00011546	1.72e-06	0.328974	0.442615	37816	37780	-36	0.35217	0.384978	0.335301	0.33538	7.857e-05	0.195783	0.0727775
			ABLM1	O14639	0.00023424	0.00023771	3.47e-06	0.324975	0.354724	51504	51540	36	0.302725	0.345467	0.322206	0.321983	-0.00022253	0.386158	0.135254
			ACACA	Q13085	0.0001567	0.00015969	2.99e-06	0.255791	0.404588	22782	22554	-228	0.315578	0.444421	0.302224	0.302195	-2.925e-05	0.360606	0.279588
			ACACB	O00763	0	0	0	1	0.192146	0	0	0	1	0.192946	0.216576	0.216601	2.455e-05	0.237952	0.249455
			ACE	P12821	9.1e-07	9.2e-07	1e-08	0.38253	0.223202	90	90	0	0.770393	0.206949	0.237605	0.237527	-7.869e-05	0.476908	0.303348
			ACE2	Q9BYF1	0.00136514	0.00136556	4.2e-07	0.185743	0.115951	167688	157156	-10532	0.0606061	0.175778	0.271	0.270003	-0.00099639	0.241483	0.482294
			ACES	P22303	1.672e-05	1.677e-05	5e-08	0.179719	0.369556	3518	3416	-102	0.0805639	0.372177	0.271424	0.271216	-0.00020828	0.392315	0.491345
			ACHA	P02708	0.00115535	0.00116308	7.73e-06	0.321932	0.13601	141430	138186	-3244	0.0830831	0.196617	0.235378	0.235367	-1.151e-05	0.330637	0.294907
			ACHA2	Q15822	2.5e-07	2.5e-07	0	0.0201005	0.199113	6	6	0	0.961809	0.195015	0.177048	0.177067	1.905e-05	0.234879	0.142113
			ACHA3	P32297	0	0	0	1	0.192146	0	0	0	1	0.192946	0.150436	0.15045	1.388e-05	0.235176	0.0680967
			ACHA4	P43681	0.00172985	0.0017414	1.155e-05	0.401408	0.0918194	287628	280332	-7296	0.0966767	0.102893	0.21507	0.215098	2.766e-05	0.235944	0.246222
			ACHA5	P30532	0	0	0	1	0.192146	0	0	0	1	0.192946	0.150436	0.15045	1.388e-05	0.234	0.0680967
			ACHA7	P36544	5.112e-05	5.189e-05	7.7e-07	0.283852	0.474543	8280	8298	18	0.177889	0.452906	0.3012	0.301243	4.32e-05	0.218876	0.286776
			ACHB2	P17787	0.00057662	0.00058047	3.85e-06	0.247247	0.254165	95876	93444	-2432	0.0980789	0.264583	0.215044	0.215071	2.748e-05	0.237425	0.246112
			ACHB4	P30926	0.00115432	0.00116203	7.71e-06	0.405622	0.136913	191768	186904	-4864	0.0742227	0.149349	0.177066	0.177085	1.917e-05	0.23565	0.142217
			ACHD	Q07001	0.00112146	0.00112986	8.4e-06	0.270541	0.141502	148836	145320	-3516	0.105316	0.18918	0.294243	0.294238	-4.2e-06	0.28987	0.339283
			ACHE	Q04844	0	0	0	1	0.192146	0	0	0	1	0.192946	0.190542	0.190534	-7.48e-06	0.329305	0.189053
			ACHG	P07510	0	0	0	1	0.192146	0	0	0	1	0.192946	0.190542	0.190534	-7.48e-06	0.327309	0.189053
			ACK1	Q07912	0.00089564	0.00090132	5.68e-06	0.296891	0.170688	121852	119954	-1898	0.0975855	0.218114	0.324529	0.324258	-0.00027123	0.366098	0.121551
			ACL6A	O96019	0.00073875	0.00068811	-5.064e-05	0.0110442	0.211573	129882	107678	-22204	0.00100503	0.238981	0.3148	0.310622	-0.00417788	0.21148	0.213922
			ACL6B	O94805	3.9e-07	4e-07	1e-08	0.232932	0.204511	102	102	0	0.933934	0.20846	0.249101	0.249005	-9.609e-05	0.472946	0.365217
			ACLY	P53396	0.00016055	0.00017069	1.014e-05	0.059	0.397774	37998	39894	1896	0.0130391	0.378343	0.307235	0.307047	-0.00018805	0.413655	0.242904
			ACM1	P11229	0	0	0	1	0.192146	0	0	0	1	0.192946	0.264	0.263694	-0.00030583	0.28028	0.439891
			ACM2	P08172	4.022e-05	4.088e-05	6.6e-07	0.345691	0.450537	4056	4086	30	0.214644	0.388914	0.252	0.251774	-0.00022617	0.334002	0.380602
			ACM3	P20309	0.00013221	0.00013507	2.86e-06	0.251755	0.42535	17384	17454	70	0.253776	0.476933	0.28411	0.284134	2.452e-05	0.290581	0.411054
			ACM4	P08173	3.51e-06	3.82e-06	3.1e-07	0.0441324	0.278163	810	848	38	0.0210843	0.277357	0.300156	0.299747	-0.00040848	0.287879	0.2971
			ACTA	P62736	6.049e-05	6.505e-05	4.56e-06	0.055332	0.496055	11246	11660	414	0.103206	0.487978	0.302303	0.302248	-5.528e-05	0.400602	0.279245
			ACTC	P68032	0.00125173	0.00126089	9.16e-06	0.333333	0.124828	193204	189004	-4200	0.136136	0.147741	0.333333	0.333333	0	0.343687	0.0800575
ACTG		ACTG	ACTG	P63261	0.0041783	0.00393375	-0.00024455	0.0290873	0.0409999	859706	745100	-114606	0.00300601	0.0406052	0.360187	0.356832	-0.00335526	0.214859	0.025872
			ACTHR	Q01718	0	0	0	1	0.192146	0	0	0	1	0.192946	0.178296	0.177808	-0.00048815	0.242424	0.144455
			ACTN1	P12814	0.0031857	0.0032363	5.06e-05	0.164659	0.048858	473314	471530	-1784	0.244467	0.0623596	0.343989	0.343994	4.72e-06	0.303213	0.0468295
			ACTN2	P35609	0.00116564	0.00114407	-2.157e-05	0.143863	0.140047	176818	169754	-7064	0.116349	0.16619	0.31366	0.313308	-0.00035197	0.347082	0.189915
			ACTN3	Q08043	0	0	0	1	0.192146	0	0	0	1	0.192946	0.260585	0.260501	-8.407e-05	0.480924	0.423963
			ACTN4	O43707	0.00216124	0.00219568	3.444e-05	0.242211	0.0710732	372906	371282	-1624	0.378378	0.0790268	0.341817	0.341807	-9.76e-06	0.313883	0.0518538
ACTS			ACTS	P68133	0.00516172	0.00524431	8.259e-05	0.18392	0.0297149	875576	875056	-520	0.173038	0.0336924	0.358881	0.358803	-7.812e-05	0.431156	0.0241732
			ACTZ	P61163	1.56e-06	1.58e-06	2e-08	0.584168	0.238725	314	314	0	0.765594	0.234876	0.273589	0.273652	6.378e-05	0.179899	0.488457
			ACV1B	P36896	0.00043626	0.00044627	1.001e-05	0.10743	0.28498	86346	87108	762	0.0783133	0.278492	0.283644	0.283619	-2.542e-05	0.359077	0.414625
			ACVL1	P37023	3.182e-05	3.172e-05	-1e-07	0.102823	0.425205	7494	7486	-8	0.368474	0.443517	0.271914	0.271173	-0.0007409	0.257576	0.491033
			ACVR1	Q04771	0.00238931	0.00242958	4.027e-05	0.142857	0.0641593	432028	429112	-2916	0.352764	0.0691506	0.314457	0.314367	-9.024e-05	0.429719	0.182083
			ADA	P00813	0.00022758	0.0002293	1.72e-06	0.35146	0.358507	28644	27896	-748	0.040201	0.420578	0.305071	0.304818	-0.00025375	0.365462	0.26111
			ADA10	O14672	0.00103436	0.00106239	2.803e-05	0.0623116	0.148424	128616	129362	746	0.0952859	0.208181	0.321429	0.321172	-0.0002566	0.362086	0.139989
			ADA17	P78536	0.00038943	0.00034689	-4.254e-05	0.04154	0.310226	61164	52950	-8214	0.0401606	0.341732	0.308906	0.307349	-0.00155725	0.246216	0.240765
			ADA1A	P35348	9.229e-05	9.265e-05	3.6e-07	0.197382	0.467323	13020	12796	-224	0.149899	0.496765	0.269168	0.269095	-7.257e-05	0.4749	0.475764
			ADA1B	P35368	0.00047993	0.00048797	8.04e-06	0.318593	0.274812	72524	72402	-122	0.362725	0.303442	0.311293	0.311212	-8.122e-05	0.450251	0.208768
			ADA1D	P25100	0	0	0	1	0.192146	0	0	0	1	0.192946	0.246304	0.24635	4.617e-05	0.190332	0.347142
			ADA2A	P08913	0.00013105	0.00013312	2.07e-06	0.364185	0.427404	30418	30450	32	0.320963	0.411138	0.304857	0.304683	-0.00017393	0.411469	0.262172
			ADA2B	P18089	9.32e-06	9.21e-06	-1.1e-07	0.111111	0.327525	4436	4234	-202	0.0451807	0.391689	0.294168	0.294062	-0.00010522	0.488934	0.341887
			ADA2C	P18825	3.529e-05	3.598e-05	6.9e-07	0.294177	0.437664	7582	7710	128	0.129779	0.446528	0.290104	0.290219	0.0001154	0.126135	0.372025
			ADAM9	Q13443	0.00013738	0.00010372	-3.366e-05	0.0210421	0.455135	18576	13824	-4752	0.022022	0.495109	0.29103	0.288178	-0.00285157	0.215075	0.385002
			ADCY1	Q08828	5.01e-05	5.111e-05	1.01e-06	0.115927	0.473142	11866	11870	4	0.200605	0.489212	0.26406	0.263755	-0.00030557	0.28012	0.440205
			ADCY2	Q08462	2.99e-06	3.13e-06	1.4e-07	0.0513078	0.264065	454	454	0	0.449597	0.247092	0.238505	0.238349	-0.00015582	0.372116	0.308652
			ADCY3	O60266	0	0	0	1	0.192146	0	0	0	1	0.192946	0.247394	0.24727	-0.00012386	0.410822	0.352532
			ADCY5	O95622	0.00040156	0.00040277	1.21e-06	0.157472	0.295434	73316	72042	-1274	0.165496	0.30418	0.300912	0.300559	-0.000353	0.307229	0.292262
			ADCY6	O43306	2.204e-05	2.265e-05	6.1e-07	0.16499	0.400096	3650	3664	14	0.274549	0.376968	0.278246	0.278254	7.63e-06	0.317954	0.457219
			ADCY7	P51828	0	0	0	1	0.192146	0	0	0	1	0.192946	0.272942	0.272936	-5.77e-06	0.330993	0.496063
			ADCY8	P40145	7.65e-06	7.95e-06	3e-07	0.141851	0.318508	1854	1870	16	0.261307	0.323384	0.272878	0.27188	-0.00099768	0.225352	0.496637
			ADDG	Q9UEY8	0	0	0	1	0.192146	0	0	0	1	0.192946	0.2778	0.277805	4.63e-06	0.299299	0.460385
			ADIPO	Q15848	0	0	0	1	0.192146	0	0	0	1	0.192946	0.185284	0.185203	-8.109e-05	0.37827	0.169515
			ADML	P35318	5.166e-05	5.315e-05	1.49e-06	0.105847	0.476378	6002	5922	-80	0.189759	0.417242	0.266518	0.266429	-8.867e-05	0.497502	0.455752
			ADR2	Q86V24	0.0005772	0.00058106	3.86e-06	0.236895	0.248498	67134	64238	-2896	0.0151668	0.316059	0.227407	0.227285	-0.00012224	0.375502	0.268722
			ADRB1	P08588	9.469e-05	9.575e-05	1.06e-06	0.399198	0.462926	20818	20810	-8	0.395186	0.453863	0.307508	0.307514	5.63e-06	0.281974	0.23959
			ADRB2	P07550	0.00127581	0.00109035	-0.00018546	0.016	0.145669	214162	194332	-19830	0.0370741	0.144661	0.331833	0.330993	-0.00083962	0.241968	0.0895457
			ADRB3	P13945	0.00011601	0.0001171	1.09e-06	0.415742	0.440865	21384	21320	-64	0.359799	0.450735	0.294343	0.294238	-0.00010418	0.487437	0.339283
			ADSV	Q9Y6U3	9.45e-06	9.62e-06	1.7e-07	0.404213	0.330753	5528	5488	-40	0.306533	0.411659	0.310651	0.310258	-0.00039309	0.299497	0.217475
			ADT2	P05141	0.00138758	0.00131668	-7.09e-05	0.0201207	0.118706	450030	393168	-56862	0.00601805	0.0743174	0.345533	0.342011	-0.00352138	0.216	0.0513019
			ADT3	P12236	0.00094893	0.00087487	-7.406e-05	0.0140845	0.175165	256092	217126	-38966	0.0160481	0.127598	0.331769	0.327529	-0.00424066	0.210101	0.103722
			ADX	P10109	0	0	0	1	0.192146	0	0	0	1	0.192946	0.241632	0.241493	-0.00013878	0.389558	0.324799
			AF1L2	Q8N4X5	0	0	0	1	0.192146	0	0	0	1	0.192946	0.292899	0.292911	1.183e-05	0.27683	0.351373
			AF9	P42568	4.21e-06	4.25e-06	4e-08	0.369215	0.285362	940	932	-8	0.388554	0.282551	0.274238	0.274263	2.472e-05	0.246231	0.48375
AFAD			AFAD	P55196	0.00363926	0.00369662	5.736e-05	0.110664	0.0431649	668082	663512	-4570	0.353059	0.0443185	0.330315	0.330358	4.341e-05	0.264322	0.0917304
			AGRIN	O00468	3.074e-05	2.973e-05	-1.01e-06	0.0772317	0.419827	3150	3074	-76	0.136959	0.363651	0.26566	0.265464	-0.00019622	0.375125	0.449104
			AGRP	O00253	0.00093179	0.00093939	7.6e-06	0.135542	0.164226	174676	175920	1244	0.0471888	0.159509	0.218957	0.21829	-0.00066714	0.247236	0.252387
			AGTR1	P30556	0.00126769	0.0012822	1.451e-05	0.377131	0.122416	229058	228654	-404	0.227136	0.122274	0.33063	0.330548	-8.142e-05	0.448795	0.0909856
			AGTR2	P50052	0.00047054	0.00047483	4.29e-06	0.476	0.278162	65276	65078	-198	0.234234	0.314148	0.292479	0.292289	-0.00018971	0.400605	0.355848
			AHNK	Q09666	2.651e-05	2.68e-05	2.9e-07	0.512588	0.412156	5562	5520	-42	0.375375	0.41214	0.304214	0.304332	0.00011823	0.128514	0.265224
			AHR	P35869	7.377e-05	7.189e-05	-1.88e-06	0.0813253	0.494371	28084	25422	-2662	0.0373737	0.431353	0.326948	0.324044	-0.00290404	0.21988	0.122761
			AHRR	A9YTQ3	0	0	0	1	0.192146	0	0	0	1	0.192946	0.247006	0.247022	1.568e-05	0.289447	0.350888
			AHSA1	O95433	0.00014277	0.00014728	4.51e-06	0.127255	0.415448	29094	29492	398	0.117825	0.415078	0.303044	0.302966	-7.726e-05	0.439394	0.273853
			AICDA	Q9GZX7	0	0	0	1	0.192146	0	0	0	1	0.192946	0.236406	0.236369	-3.718e-05	0.404618	0.298867
			AIFM1	O95831	0.00024798	0.00021689	-3.109e-05	0.0312185	0.365599	76626	57954	-18672	0.0171891	0.331223	0.317162	0.31009	-0.00707238	0.210262	0.21862
			AIRE	O43918	0.00016918	0.00020652	3.734e-05	0.00803213	0.372161	47154	51456	4302	0.00704935	0.345726	0.331706	0.331727	2.114e-05	0.307229	0.0868273
			AKAP5	P24588	0.00030714	0.00030867	1.53e-06	0.214859	0.324966	49232	48368	-864	0.130435	0.353058	0.302964	0.302593	-0.00037065	0.310621	0.276676
			AKAP8	O43823	4.502e-05	3.68e-05	-8.22e-06	0.0351406	0.439875	12336	9280	-3056	0.0150301	0.46534	0.30759	0.302354	-0.0052357	0.21875	0.278442
			AKAP9	Q99996	0.00030752	0.00031473	7.21e-06	0.194389	0.323145	45826	45150	-676	0.138	0.362109	0.301462	0.301348	-0.00011335	0.49348	0.285924
			AKP13	Q12802	0.00103632	0.00105226	1.594e-05	0.149043	0.149377	177874	177776	-98	0.162135	0.157621	0.322116	0.322164	4.815e-05	0.252008	0.133946
AKT1			AKT1	P31749	0.00996278	0.0102503	0.00028753	0.0655903	0.0124	1899090	1907388	8298	0.0683417	0.0122459	0.37226	0.37239	0.0001295	0.155779	0.0100822
			AKT2	P31751	0.00028238	0.00028808	5.7e-06	0.207623	0.332396	61548	61200	-348	0.436309	0.322918	0.320893	0.320813	-8.001e-05	0.449246	0.142844
			AKT3	Q9Y243	3.903e-05	3.971e-05	6.8e-07	0.257515	0.447592	8678	8652	-26	0.419679	0.457868	0.298552	0.298474	-7.866e-05	0.459378	0.305834
			AKTS1	Q96B36	3.892e-05	4.372e-05	4.8e-06	0.0120603	0.457435	11484	12254	770	0.0542169	0.492046	0.302251	0.302275	2.4e-05	0.266332	0.279057
			AL5AP	P20292	0	0	0	1	0.192146	0	0	0	1	0.192946	0.234661	0.234708	4.778e-05	0.177355	0.291952
			AL9A1	P49189	0	0	0	1	0.192146	0	0	0	1	0.192946	0.255946	0.255949	2.61e-06	0.300503	0.400162
ALBU			ALBU	P02768	0.00924835	0.00936133	0.00011298	0.203015	0.0147145	1193850	1181194	-12656	0.396985	0.0261474	0.33231	0.332271	-3.89e-05	0.362538	0.0842329
			ALDOA	P04075	0.0006402	0.00064464	4.44e-06	0.442886	0.222199	96514	93754	-2760	0.0613682	0.264016	0.304348	0.304144	-0.00020362	0.412298	0.266674
			ALDR	P15121	0.00014814	0.00015173	3.59e-06	0.187375	0.412144	38670	39054	384	0.132663	0.380632	0.304188	0.30401	-0.00017763	0.445783	0.267649
			ALG2	Q9H553	0	0	0	1	0.192146	0	0	0	1	0.192946	0.227541	0.22751	-3.129e-05	0.398594	0.269498
			ALK	Q9UM73	0.00329377	0.0033371	4.333e-05	0.230151	0.0476949	517634	513260	-4374	0.398798	0.0573954	0.340106	0.340018	-8.823e-05	0.435614	0.0566247
			AMD	P19021	1.648e-05	1.672e-05	2.4e-07	0.309237	0.369555	1918	1914	-4	0.428571	0.325628	0.2839	0.28397	6.993e-05	0.179617	0.412049
			AMHR2	Q16671	1.167e-05	1.184e-05	1.7e-07	0.233871	0.343045	816	818	2	0.177062	0.275037	0.260038	0.259872	-0.00016587	0.402806	0.420566
			AMPD1	P23109	0	0	0	1	0.192146	0	0	0	1	0.192946	0.203512	0.203548	3.592e-05	0.15996	0.226468
			AMPD3	Q01432	0	0	0	1	0.192146	0	0	0	1	0.192946	0.249442	0.24942	-2.179e-05	0.362626	0.368247
			AMPH	P49418	0.00021259	0.00021601	3.42e-06	0.220884	0.366351	42706	42382	-324	0.476334	0.371732	0.303841	0.303501	-0.00034019	0.337022	0.271022
			AMPM2	P50579	9.434e-05	9.63e-05	1.96e-06	0.311492	0.462225	19136	19310	174	0.215863	0.464687	0.308549	0.308589	4.032e-05	0.223896	0.2318
			AN13B	Q86YJ7	0	0	0	1	0.192146	0	0	0	1	0.192946	0.253809	0.253741	-6.772e-05	0.473843	0.389495
			AN32B	Q92688	8.24e-06	8.53e-06	2.9e-07	0.133668	0.322202	2252	2270	18	0.206827	0.338426	0.276294	0.275492	-0.00080152	0.244221	0.476962
			ANC2	Q9UJX6	0.00013497	0.00013759	2.62e-06	0.210843	0.422836	18156	18238	82	0.19697	0.471266	0.290396	0.290562	0.00016665	0.0663317	0.369089
ANDR			ANDR	P10275	0.0110058	0.0112395	0.00023371	0.0894472	0.0104266	2346392	2309000	-37392	0.306452	0.0105795	0.384573	0.383638	-0.00093472	0.27683	0.00377046
			ANF	P01160	0.00028852	0.00029044	1.92e-06	0.418	0.331076	115882	111126	-4756	0.0609391	0.23154	0.261293	0.261252	-4.014e-05	0.427711	0.427909
			ANFC	P23582	0.00028852	0.00029044	1.92e-06	0.414487	0.331076	115882	111126	-4756	0.06143	0.23154	0.261293	0.261252	-4.014e-05	0.427136	0.427909
			ANFY1	Q9P2R3	0	0	0	1	0.192146	0	0	0	1	0.192946	0.227631	0.22763	-6.1e-07	0.299	0.269905
			ANGI	P03950	0.00021401	0.00021621	2.2e-06	0.289023	0.366183	27828	27666	-162	0.351515	0.421603	0.269923	0.269813	-0.00011023	0.441532	0.480883
			ANGP1	Q15389	1.15e-06	1.18e-06	3e-08	0.203815	0.229475	148	148	0	0.707121	0.216334	0.251142	0.251058	-8.393e-05	0.496461	0.376634
			ANGT	P01019	0.00072656	0.00074453	1.797e-05	0.0502008	0.19861	96188	96308	120	0.0422535	0.258975	0.265762	0.2653	-0.00046179	0.330312	0.448431
			ANK1	P16157	0.00013881	0.00013812	-6.9e-07	0.11334	0.422471	19156	18896	-260	0.186373	0.46732	0.285138	0.284981	-0.00015729	0.40982	0.405767
			ANPRC	P17342	8e-08	8e-08	0	0.0091001	0.193275	2	2	0	0.991927	0.193831	0.2072	0.207175	-2.5e-05	0.427856	0.231514
			ANR27	Q96NW4	0	0	0	1	0.192146	0	0	0	1	0.192946	0.256079	0.256139	6.068e-05	0.164659	0.401817
			ANS1A	Q92625	0.00018574	0.00018661	8.7e-07	0.271084	0.386595	34860	34012	-848	0.0523666	0.397979	0.303097	0.302966	-0.00013028	0.5	0.273853
			ANS1B	Q7Z6G8	2.739e-05	3.022e-05	2.83e-06	0.0311871	0.421037	9082	9830	748	0.00300903	0.472792	0.299974	0.299878	-9.6e-05	0.458835	0.296268
			ANTR1	Q9H6X2	3.82e-06	3.92e-06	1e-07	0.243216	0.280616	1206	1212	6	0.30993	0.29444	0.28258	0.282409	-0.0001714	0.437	0.426046
			ANX11	P50995	0.00027685	0.00027831	1.46e-06	0.25328	0.336936	26680	26462	-218	0.403614	0.426788	0.266785	0.266739	-4.572e-05	0.407445	0.458704
			ANXA1	P04083	0.00100258	0.00101818	1.56e-05	0.245737	0.152741	244302	240828	-3474	0.239394	0.11706	0.353211	0.353134	-7.671e-05	0.427136	0.0307446
ANXA2			ANXA2	P07355	0.0037683	0.00386356	9.526e-05	0.0846774	0.0413353	996574	1000610	4036	0.0100402	0.0294723	0.374514	0.374578	6.468e-05	0.266129	0.0088449
			ANXA3	P12429	4.18e-06	4.28e-06	1e-07	0.242455	0.285724	1812	1844	32	0.130653	0.321945	0.282626	0.282571	-5.521e-05	0.419419	0.424459
			AP1M2	Q9Y6Q5	2.395e-05	2.433e-05	3.8e-07	0.338353	0.405687	3456	3452	-4	0.363363	0.372931	0.266579	0.266553	-2.638e-05	0.374122	0.457133
			AP2A1	O95782	0.00144267	0.00146553	2.286e-05	0.327291	0.107546	229428	228174	-1254	0.489919	0.122578	0.335626	0.33538	-0.00024621	0.414243	0.0727775
			AP2B1	P63010	0.00145361	0.00147583	2.222e-05	0.177778	0.106283	215458	215168	-290	0.181727	0.128777	0.327041	0.327124	8.306e-05	0.188698	0.105465
			AP2S1	P53680	1.569e-05	1.583e-05	1.4e-07	0.459839	0.36441	2386	2362	-24	0.312563	0.34141	0.299715	0.299747	3.289e-05	0.238716	0.2971
			AP3B1	O00203	3.164e-05	3.281e-05	1.17e-06	0.161647	0.428652	7048	7154	106	0.129648	0.438981	0.298167	0.297751	-0.00041624	0.305752	0.312366
			AP3D1	O14617	3.443e-05	3.533e-05	9e-07	0.214429	0.435737	5970	6026	56	0.166163	0.419676	0.294493	0.29449	-2.53e-06	0.307229	0.336119
			APAF	O14727	0.0001368	0.00014104	4.24e-06	0.150301	0.419537	31686	31960	274	0.131394	0.404511	0.310095	0.310006	-8.856e-05	0.464859	0.219106
			APBB1	O00213	0.00048608	0.00049034	4.26e-06	0.417671	0.273977	96206	95532	-674	0.495477	0.260554	0.317511	0.317206	-0.00030544	0.341709	0.16263
			APC	P25054	0.00160257	0.00163385	3.128e-05	0.230151	0.0960893	258034	257710	-324	0.273461	0.109704	0.333558	0.333624	6.617e-05	0.202811	0.0790023
			APC2	O95996	0.00012175	0.00012416	2.41e-06	0.229839	0.435407	19756	19664	-92	0.473843	0.461744	0.291789	0.291621	-0.0001687	0.437	0.360151
			APC4	Q9UJX5	1.179e-05	1.198e-05	1.9e-07	0.445565	0.343813	2778	2778	0	0.345691	0.355064	0.270788	0.270832	4.394e-05	0.233	0.488135
			APEX1	P27695	0.00036758	0.00038789	2.031e-05	0.0472837	0.299368	100154	103406	3252	0.304129	0.246538	0.326733	0.326814	8.085e-05	0.210843	0.107595
			APEX2	Q9UBZ4	1.917e-05	2.054e-05	1.37e-06	0.041289	0.39042	3140	3266	126	0.0671343	0.369109	0.279977	0.279587	-0.00039002	0.312563	0.449505
			APH1A	Q96BI3	2.7e-07	2.7e-07	0	0.0980981	0.199925	56	56	0	0.900503	0.20049	0.261253	0.261153	-9.985e-05	0.460222	0.42718
			APLP2	Q06481	0.00012387	0.00012699	3.12e-06	0.248497	0.432527	23604	23792	188	0.221221	0.438787	0.312839	0.312824	-1.479e-05	0.31996	0.193111
			APOA	P08519	7.846e-05	6.653e-05	-1.193e-05	0.0191339	0.498448	9678	7422	-2256	0.0741483	0.442621	0.266949	0.265464	-0.00148563	0.232698	0.449104
			APOA1	P02647	0.00309925	0.00313454	3.529e-05	0.212851	0.0502773	414412	408608	-5804	0.244734	0.0722906	0.296027	0.295984	-4.316e-05	0.365191	0.324342
			APOB	P04114	0.00024832	0.00025186	3.54e-06	0.457372	0.348372	52638	51730	-908	0.161972	0.344914	0.305582	0.305304	-0.00027826	0.371743	0.257038
			APOE	P02649	0.00051667	0.00052209	5.42e-06	0.446894	0.267061	92014	91040	-974	0.345729	0.270094	0.293793	0.293486	-0.00030777	0.363727	0.347721
			APOL1	O14791	0	0	0	1	0.192146	0	0	0	1	0.192946	0.240191	0.240045	-0.00014669	0.381143	0.316858
			APR	Q13794	6.94e-05	6.73e-05	-2.1e-06	0.0471414	0.499214	10256	9880	-376	0.0251509	0.473421	0.280794	0.280682	-0.00011244	0.481444	0.440194
			APT	P07741	7.86e-06	8.18e-06	3.2e-07	0.113131	0.320022	8372	8566	194	0.055668	0.456636	0.290883	0.290513	-0.00036997	0.291457	0.369462
			AQP3	Q92482	0	0	0	1	0.192146	0	0	0	1	0.192946	0.279751	0.279656	-9.582e-05	0.466934	0.448925
			AR2BP	Q9Y2Y0	0	0	0	1	0.192146	0	0	0	1	0.192946	0.217132	0.216737	-0.00039549	0.283266	0.249813
			ARAF	P10398	0.00040739	0.00041653	9.14e-06	0.129388	0.29096	62316	62308	-8	0.186304	0.319684	0.31079	0.310818	2.792e-05	0.267267	0.211999
ARBK1			ARBK1	P25098	0.00485527	0.00503565	0.00018038	0.0732932	0.0307849	874528	892990	18462	0.0544355	0.0325788	0.341144	0.34113	-1.421e-05	0.360524	0.053655
			ARBK2	P35626	4.201e-05	4.344e-05	1.43e-06	0.129909	0.456905	10156	10094	-62	0.181727	0.475772	0.273632	0.273283	-0.00034879	0.342397	0.492186
			ARC1A	Q92747	7.717e-05	7.842e-05	1.25e-06	0.188566	0.485225	6498	6512	14	0.166834	0.428685	0.295069	0.295071	1.32e-06	0.281124	0.330666
			ARC1B	O15143	4.243e-05	4.322e-05	7.9e-07	0.245226	0.456406	8050	8062	12	0.263791	0.450287	0.296458	0.296571	0.00011283	0.11747	0.3198
			ARF1	P84077	0.00081088	0.00082705	1.617e-05	0.15996	0.182303	138896	138568	-328	0.245984	0.196202	0.30979	0.309811	2.108e-05	0.298897	0.220365
			ARF3	P61204	5.586e-05	5.704e-05	1.18e-06	0.218656	0.483619	6052	6070	18	0.240964	0.420449	0.260683	0.26056	-0.00012294	0.471831	0.424186
			ARF4	P18085	6.06e-06	6.1e-06	4e-08	0.278112	0.305626	4546	4490	-56	0.266533	0.395507	0.300677	0.300454	-0.00022294	0.354481	0.293003
			ARF6	P62330	0.0028211	0.00291595	9.485e-05	0.073	0.0540719	504718	507546	2828	0.0974874	0.058248	0.324044	0.323983	-6.034e-05	0.399399	0.123151
			ARFP1	P53367	5.21e-06	5.29e-06	8e-08	0.445116	0.298439	814	814	0	0.433602	0.274485	0.248191	0.248126	-6.567e-05	0.484391	0.357807
			ARFP2	P53365	6.785e-05	7.09e-05	3.05e-06	0.0572864	0.496213	9956	9928	-28	0.256513	0.473966	0.279368	0.27875	-0.00061829	0.275654	0.454467
			ARGI1	P05089	0.00057873	0.00058261	3.88e-06	0.282696	0.245651	61952	60042	-1910	0.0481444	0.326176	0.250579	0.250582	3.87e-06	0.304609	0.374107
			ARGI2	P78540	0	0	0	1	0.192146	0	0	0	1	0.192946	0.200382	0.200384	2.55e-06	0.306452	0.218589
			ARH	Q5SW96	1.636e-05	1.691e-05	5.5e-07	0.122244	0.370509	2962	2966	4	0.366197	0.359847	0.281845	0.280911	-0.000934	0.249497	0.438326
			ARHG1	Q92888	9.961e-05	9.966e-05	5e-08	0.163655	0.458705	20416	20128	-288	0.186747	0.457775	0.303921	0.303876	-4.501e-05	0.399799	0.268614
			ARHG2	Q92974	0.00019027	0.00019517	4.9e-06	0.158317	0.380171	52750	52692	-58	0.379276	0.342398	0.32365	0.323648	-1.96e-06	0.321932	0.125291
			ARHG3	Q9NR81	1.636e-05	1.729e-05	9.3e-07	0.046046	0.371476	2264	2344	80	0.0531595	0.341005	0.25642	0.256368	-5.15e-05	0.442211	0.404097
			ARHG4	Q9NR80	0.0002198	0.00022764	7.84e-06	0.0967742	0.359348	47224	47978	754	0.081571	0.354332	0.32356	0.323496	-6.338e-05	0.426989	0.126239
			ARHG5	Q12774	0	0	0	1	0.192146	0	0	0	1	0.192946	0.278963	0.278976	1.247e-05	0.279116	0.453115
			ARHG6	Q15052	0.00035574	0.00036411	8.37e-06	0.19196	0.306451	78660	79344	684	0.150353	0.291544	0.320211	0.320305	9.453e-05	0.202213	0.14588
			ARHG7	Q14155	0.00040537	0.00041019	4.82e-06	0.347041	0.292871	84030	82934	-1096	0.167503	0.285921	0.322776	0.322859	8.305e-05	0.193548	0.129569
			ARHGI	Q6ZSZ5	4.56e-06	4.62e-06	6e-08	0.465932	0.289089	1050	1050	0	0.741224	0.286585	0.261115	0.261074	-4.127e-05	0.405433	0.426662
			ARI1A	O14497	0.00010357	0.00012263	1.906e-05	0.00707786	0.436799	20910	23112	2202	0.0180905	0.441864	0.279526	0.279157	-0.00036912	0.333668	0.452093
			ARI4B	Q4LE39	0	0	0	1	0.192146	0	0	0	1	0.192946	0.269314	0.269032	-0.00028211	0.342397	0.475311
			ARI5B	Q14865	0	0	0	1	0.192146	0	0	0	1	0.192946	0.248334	0.248233	-0.0001006	0.475855	0.358607
			ARID2	Q68CP9	4.4e-07	4.4e-07	0	0.1002	0.206531	126	122	-4	0.124373	0.21097	0.26501	0.264627	-0.00038282	0.290452	0.44567
			ARL2	P36404	0.00060088	0.000606	5.12e-06	0.0863454	0.236287	83678	78616	-5062	0.021148	0.293484	0.277333	0.276688	-0.00064502	0.275932	0.468444
			ARL5B	Q96KC2	0	0	0	1	0.192146	0	0	0	1	0.192946	0.265864	0.26575	-0.00011312	0.487976	0.450595
			ARNT	P27540	0.00097399	0.00098545	1.146e-05	0.183468	0.157826	161232	157140	-4092	0.0953815	0.175795	0.328001	0.328028	2.745e-05	0.282696	0.102152
			ARNT2	Q9HBZ2	2.64e-06	2.94e-06	3e-07	0.0271903	0.261184	378	400	22	0.0482897	0.242326	0.262659	0.262708	4.879e-05	0.204225	0.435208
			ARP10	Q9NZ32	0	0	0	1	0.192146	0	0	0	1	0.192946	0.264121	0.264079	-4.218e-05	0.428428	0.442774
			ARP2	P61160	0.00059263	0.00060456	1.193e-05	0.217523	0.236808	104116	103524	-592	0.390782	0.246286	0.326609	0.326256	-0.00035356	0.316265	0.110766
			ARP3	P61158	0.0003205	0.00032179	1.29e-06	0.2	0.319612	66800	65464	-1336	0.113568	0.313408	0.327195	0.326876	-0.00031988	0.317221	0.107093
			ARP5L	Q9BPX5	4.54e-06	4.62e-06	8e-08	0.380522	0.289089	818	826	8	0.162651	0.275888	0.277023	0.277	-2.287e-05	0.337688	0.46583
			ARP8	Q9H981	1.091e-05	1.162e-05	7.1e-07	0.0651956	0.341341	1552	1552	0	0.599798	0.310566	0.273222	0.272396	-0.00082556	0.245226	0.499762
			ARPC2	O15144	0.00013026	0.00013265	2.39e-06	0.295661	0.427941	34276	34368	92	0.280967	0.396867	0.317802	0.31788	7.713e-05	0.194779	0.158903
			ARPC3	O15145	0.00092235	0.00093204	9.69e-06	0.0932798	0.16555	134712	132518	-2194	0.18656	0.203203	0.302832	0.302833	1.34e-06	0.278392	0.274869
			ARPC4	P59998	0.0001721	0.00017493	2.83e-06	0.207415	0.394643	20194	19972	-222	0.24218	0.45893	0.302858	0.302753	-0.00010504	0.462777	0.275505
			ARPC5	O15511	9.187e-05	9.371e-05	1.84e-06	0.215943	0.465561	21522	21474	-48	0.44165	0.449935	0.316092	0.315954	-0.00013821	0.493952	0.170754
			ARS2	Q9BXP5	3.3e-06	3.42e-06	1.2e-07	0.184925	0.270481	1062	1078	16	0.214859	0.287839	0.282834	0.282432	-0.00040195	0.289023	0.425878
			ASC	Q9ULZ3	0.00038959	0.00039016	5.7e-07	0.114458	0.298772	59874	58176	-1698	0.0726539	0.330506	0.28258	0.282085	-0.00049543	0.286002	0.42877
			ASF1A	Q9Y294	4.861e-05	4.951e-05	9e-07	0.267068	0.469265	11318	11342	24	0.271543	0.484956	0.27603	0.276067	3.71e-05	0.246479	0.473932
			ASGR1	P07306	0.00118245	0.0011913	8.85e-06	0.144578	0.131663	151910	147524	-4386	0.0381143	0.18588	0.287934	0.287696	-0.00023777	0.362173	0.387555
			ASGR2	P07307	0	0	0	1	0.192146	0	0	0	1	0.192946	0.223592	0.223448	-0.00014321	0.365095	0.258936
			ASH2L	Q9UBL3	0.00026137	0.00026746	6.09e-06	0.226453	0.340936	56866	56970	104	0.297487	0.334052	0.319178	0.319058	-0.00012012	0.49144	0.152068
			ASXL2	Q76L83	1.429e-05	1.478e-05	4.9e-07	0.1334	0.357733	1890	1910	20	0.168347	0.325499	0.28173	0.281692	-3.777e-05	0.400806	0.43147
			AT1A1	P05023	0.00046106	0.00047753	1.647e-05	0.0982949	0.277511	125238	126142	904	0.117706	0.211545	0.335009	0.334923	-8.654e-05	0.456653	0.074592
			AT1A3	P13637	0	0	0	1	0.192146	0	0	0	1	0.192946	0.304001	0.303768	-0.00023228	0.408635	0.269425
			AT2A1	O14983	2.36e-06	2.38e-06	2e-08	0.175	0.254111	704	722	18	0.119839	0.267604	0.280567	0.280453	-0.00011377	0.470411	0.442172
			AT2A2	P16615	0.00029712	0.00030636	9.24e-06	0.180991	0.325727	99462	100446	984	0.0670671	0.252779	0.326026	0.325916	-0.00010948	0.472892	0.112632
			AT2A3	Q93084	0.00287542	0.00289929	2.387e-05	0.200602	0.0553318	344968	336586	-8382	0.118474	0.0864974	0.29081	0.290857	4.695e-05	0.225904	0.366717
			AT2B4	P23634	0.00052631	0.00053143	5.12e-06	0.339718	0.26498	69946	69006	-940	0.273367	0.308884	0.298552	0.298577	2.491e-05	0.253521	0.30479
			AT5F1	P24539	7.86e-06	8.18e-06	3.2e-07	0.109658	0.320022	8372	8566	194	0.0551655	0.456636	0.290883	0.290513	-0.00036997	0.291291	0.369462
			ATD3B	Q5T9A4	0	0	0	1	0.192146	0	0	0	1	0.192946	0.305636	0.305494	-0.00014249	0.498998	0.255583
			ATF1	P18846	0.00014685	0.00015942	1.257e-05	0.0200803	0.404758	36090	38220	2130	0.0150451	0.383725	0.309347	0.309421	7.369e-05	0.186492	0.223971
			ATF2	P15336	0.00155297	0.00161725	6.428e-05	0.0301811	0.0970057	359332	366554	7222	0.0190955	0.0798426	0.330724	0.33039	-0.00033473	0.383149	0.0915956
			ATF3	P18847	0.00038264	0.00032779	-5.485e-05	0.0261569	0.317189	71370	48912	-22458	0.00806452	0.35204	0.309403	0.302115	-0.0072873	0.20804	0.280126
			ATF4	P18848	0.00038143	0.00039998	1.855e-05	0.0585859	0.29612	69540	70586	1046	0.0783133	0.306503	0.299844	0.299356	-0.00048783	0.32999	0.299282
			ATF6A	P18850	2.5e-06	2.63e-06	1.3e-07	0.0623116	0.257869	808	868	60	0.0351053	0.278398	0.26697	0.266326	-0.00064351	0.262575	0.454744
			ATG12	O94817	0.00122282	0.00124485	2.203e-05	0.10664	0.126369	179260	178766	-494	0.112337	0.156679	0.300026	0.299747	-0.00027853	0.371859	0.2971
			ATG3	Q9NT62	0	0	0	1	0.192146	0	0	0	1	0.192946	0.231525	0.231395	-0.00012983	0.432161	0.280152
			ATG5	Q9H1Y0	0.00075006	0.00076195	1.189e-05	0.152064	0.194475	147494	146002	-1492	0.334004	0.188283	0.30086	0.300874	1.453e-05	0.267606	0.289834
			ATG7	O95352	3.318e-05	3.045e-05	-2.73e-06	0.0381526	0.421612	5264	4384	-880	0.0231388	0.394114	0.247801	0.246068	-0.00173284	0.229062	0.345176
			ATM	Q13315	0.00062564	0.00064165	1.601e-05	0.122613	0.223185	103620	103962	342	0.30993	0.245332	0.320715	0.320544	-0.00017069	0.472892	0.144546
			ATN1	P54259	0.00334431	0.00341096	6.665e-05	0.12024	0.0464875	510006	509304	-702	0.167839	0.058029	0.317802	0.317469	-0.00033334	0.385312	0.161074
			ATPA	P25705	0.00042259	0.00041085	-1.174e-05	0.0907258	0.292581	220354	200110	-20244	0.0361809	0.140657	0.361616	0.359215	-0.00240033	0.217871	0.0235528
			ATPB	P06576	0.00043842	0.00044929	1.087e-05	0.224346	0.284233	85138	85258	120	0.279798	0.282446	0.324712	0.324442	-0.00027033	0.363819	0.120759
			ATPD	P30049	4.83e-06	4.93e-06	1e-07	0.310241	0.293546	1112	1114	2	0.383383	0.289489	0.262043	0.261948	-9.516e-05	0.495976	0.43163
			ATPG	P36542	0.00198798	0.00200759	1.961e-05	0.121976	0.0788066	399878	388738	-11140	0.132797	0.075026	0.320833	0.320663	-0.00017002	0.442095	0.143837
			ATPO	P48047	3.007e-05	3.271e-05	2.64e-06	0.00403226	0.428348	23340	24182	842	0.0221328	0.437314	0.299119	0.298811	-0.00030882	0.326633	0.302725
			ATR	Q13535	0.00047058	0.00048335	1.277e-05	0.149194	0.276172	101332	101864	532	0.421264	0.249857	0.324742	0.324686	-5.592e-05	0.395792	0.119629
			ATRX	P46100	0.00025271	0.00025535	2.64e-06	0.478	0.346144	36436	35644	-792	0.105528	0.391439	0.293222	0.292861	-0.00036023	0.335335	0.351677
			ATS5	Q9UNA0	9.2e-07	1.07e-06	1.5e-07	0.0150602	0.226998	48	68	20	0.0120603	0.200758	0.213638	0.213219	-0.00041898	0.290161	0.24175
			ATX2	Q99700	0.00016589	0.00016841	2.52e-06	0.40303	0.399366	16330	16088	-242	0.193581	0.483574	0.28542	0.285217	-0.000203	0.398	0.403309
			AURKB	Q96GD4	7.748e-05	7.949e-05	2.01e-06	0.178068	0.483833	11944	12082	138	0.150602	0.49072	0.294869	0.294894	2.524e-05	0.252758	0.332005
			AVR2A	P27037	0.0007798	0.00077692	-2.88e-06	0.11245	0.19045	134448	132892	-1556	0.34034	0.202683	0.275656	0.274964	-0.00069227	0.269347	0.479764
			AVR2B	Q13705	0.00012183	0.00012367	1.84e-06	0.294885	0.435812	30982	30976	-6	0.243461	0.40891	0.26507	0.264891	-0.00017889	0.402806	0.446498
			AXN1	O15169	0.0004655	0.00048895	2.345e-05	0.056338	0.27449	96702	98994	2292	0.021148	0.255039	0.327041	0.327031	-1.018e-05	0.307847	0.105993
			AXN2	Q9Y2T1	1.119e-05	1.162e-05	4.3e-07	0.0662651	0.341341	2778	2806	28	0.191919	0.355866	0.298141	0.298034	-0.000107	0.490946	0.309528
			B2LA1	Q16548	0.00019049	0.0001932	2.71e-06	0.299094	0.38246	21246	21070	-176	0.316951	0.452358	0.302832	0.302833	1.34e-06	0.286432	0.274869
B2MG			B2MG	P61769	0.00491607	0.0049466	3.053e-05	0.344344	0.0312259	812548	796698	-15850	0.182276	0.0381434	0.288318	0.288154	-0.00016348	0.456827	0.385096
			B4GT1	P15291	0	0	0	1	0.192146	0	0	0	1	0.192946	0.283412	0.282687	-0.00072515	0.248741	0.423345
			BACE1	P56817	0.00048784	0.0004896	1.76e-06	0.236364	0.274253	58038	57654	-384	0.386774	0.332142	0.300052	0.2998	-0.00025229	0.409869	0.296747
			BACE2	Q9Y5Z0	0	0	0	1	0.192146	0	0	0	1	0.192946	0.266456	0.266347	-0.00010965	0.461694	0.454916
			BACH1	O14867	3.69e-06	3.79e-06	1e-07	0.134538	0.277769	1308	1310	2	0.354062	0.299625	0.278604	0.278456	-0.00014772	0.452357	0.45592
			BACH2	Q9BYV9	0	0	0	1	0.192146	0	0	0	1	0.192946	0.273222	0.273218	-3.92e-06	0.313508	0.493016
			BAD	Q92934	0.0009438	0.00096691	2.311e-05	0.141141	0.160325	193380	195074	1694	0.104523	0.144276	0.338577	0.338613	3.56e-05	0.253266	0.0610585
			BAF	O75531	3.833e-05	4.513e-05	6.8e-06	0.00702811	0.459687	6554	7190	636	0.0140421	0.439539	0.294293	0.293962	-0.0003306	0.344	0.343478
			BAI1	O14514	1.39e-06	1.39e-06	0	0.122736	0.234595	236	232	-4	0.177598	0.226581	0.241312	0.24129	-2.22e-05	0.357143	0.323772
			BAI2	O60241	2.52e-05	2.561e-05	4.1e-07	0.27666	0.409382	3812	3774	-38	0.262626	0.38072	0.266477	0.26645	-2.706e-05	0.370854	0.455935
			BAIP2	Q9UQB8	0.00042655	0.00043228	5.73e-06	0.248241	0.28773	67474	67206	-268	0.294885	0.310571	0.296002	0.296061	5.85e-05	0.20804	0.323661
			BANK1	Q8NDB2	1.978e-05	2.058e-05	8e-07	0.0341023	0.390421	2586	2662	76	0.0381143	0.352621	0.272363	0.272375	1.193e-05	0.311245	0.499591
			BAP1	Q92560	0	0	0	1	0.192146	0	0	0	1	0.192946	0.271424	0.271194	-0.00022965	0.36747	0.491175
			BASI	P35613	0.00078683	0.00073837	-4.846e-05	0.0200803	0.199908	109432	101014	-8418	0.00603015	0.251708	0.293993	0.292812	-0.0011813	0.24368	0.352077
			BASP	P80723	6e-07	6.1e-07	1e-08	0.257028	0.215766	238	238	0	0.783838	0.22705	0.272149	0.272116	-3.255e-05	0.392965	0.497988
			BAT2	P48634	0.00083243	0.00084264	1.021e-05	0.184476	0.180067	110208	108436	-1772	0.14343	0.237125	0.3142	0.313908	-0.00029233	0.332665	0.184948
			BATF	Q16520	0.00012136	0.00011995	-1.41e-06	0.0823293	0.438392	34894	33190	-1704	0.0783133	0.400228	0.27625	0.275404	-0.00084564	0.254032	0.477381
			BATF3	Q9NR55	4.6e-07	8e-07	3.4e-07	0.00200401	0.220915	134	138	4	0.12024	0.214346	0.251689	0.250254	-0.00143435	0.236419	0.372953
			BAX	Q07812	0.00013175	0.00013382	2.07e-06	0.327638	0.426695	24340	24298	-42	0.363727	0.436791	0.302382	0.302514	0.00013121	0.106747	0.277263
			BAZ1A	Q9NRL2	0.00115931	0.0011671	7.79e-06	0.292	0.134892	184590	181212	-3378	0.213427	0.154001	0.272792	0.272871	7.972e-05	0.147739	0.496773
			BBC3	Q9BXH1	7.915e-05	7.998e-05	8.3e-07	0.353414	0.483169	13120	13108	-12	0.437626	0.499848	0.294268	0.294314	4.629e-05	0.213641	0.338211
			BC11B	Q9C0K0	2.2e-07	2.3e-07	1e-08	0.145582	0.197451	70	70	0	0.860442	0.201479	0.269923	0.26958	-0.00034268	0.320281	0.479334
			BCAR1	P56945	0.00186685	0.00190091	3.406e-05	0.221998	0.0840842	455852	455006	-846	0.273547	0.0642027	0.360487	0.360494	7.45e-06	0.339679	0.0220302
			BCAR3	O75815	0.00022659	0.00022948	2.89e-06	0.392786	0.358424	45090	44924	-166	0.404834	0.362958	0.312754	0.312625	-0.00012897	0.489919	0.194753
			BCCIP	Q9P287	0.00071028	0.00071635	6.07e-06	0.22668	0.206576	122352	121986	-366	0.136273	0.215777	0.28488	0.284839	-4.091e-05	0.389	0.406967
			BCL10	O95999	0.0010554	0.00107138	1.598e-05	0.135081	0.147614	203580	201224	-2356	0.326613	0.139393	0.316959	0.31671	-0.00024978	0.401408	0.165959
BCL2			BCL2	P10415	0.00413678	0.00422978	9.3e-05	0.158635	0.0371033	756966	757906	940	0.143	0.0399984	0.347125	0.347221	9.6e-05	0.186747	0.0396994
			BCL3	P20749	0.00030797	0.00025615	-5.182e-05	0.0171026	0.34571	111900	88756	-23144	0.0240722	0.274957	0.338942	0.334923	-0.00401896	0.211635	0.074592
BCL6		BCL6	BCL6	P41182	0.00382237	0.0044031	0.00058073	0.00100402	0.0346166	649426	715194	65768	0.00702811	0.0417301	0.315861	0.315751	-0.00011059	0.434608	0.172465
			BCLX	Q07817	0.00148813	0.00150738	1.925e-05	0.343404	0.10437	299316	298036	-1280	0.357071	0.0979878	0.325352	0.325269	-8.278e-05	0.438878	0.116504
			BCR	P11274	0.0019837	0.00202479	4.109e-05	0.199396	0.078274	495770	496644	874	0.205231	0.0599686	0.360187	0.36008	-0.0001076	0.461771	0.022679
			BDNF	P23560	0.00024565	0.00024559	-6e-08	0.11011	0.35088	38784	37778	-1006	0.0765357	0.384983	0.286506	0.286261	-0.0002449	0.376008	0.395833
			BECN1	Q14457	4.846e-05	4.924e-05	7.8e-07	0.235176	0.468342	6884	6854	-30	0.48994	0.43363	0.273179	0.273196	1.748e-05	0.275827	0.493244
			BEST1	O76090	0	0	0	1	0.192146	0	0	0	1	0.192946	0.255493	0.254022	-0.00147115	0.223671	0.39153
			BGAL	P16278	6.9e-07	7.1e-07	2e-08	0.109658	0.218198	74	72	-2	0.163	0.202066	0.240425	0.240346	-7.831e-05	0.488465	0.319072
			BGH3	Q15582	4.027e-05	3.978e-05	-4.9e-07	0.137	0.447592	5394	5166	-228	0.10202	0.406687	0.264302	0.263775	-0.00052706	0.294769	0.440287
			BI2L1	Q9UHR4	0	0	0	1	0.192146	0	0	0	1	0.192946	0.27614	0.276177	3.787e-05	0.239437	0.472748
			BID	P55957	0.00041047	0.00041156	1.09e-06	0.187375	0.292304	87696	85586	-2110	0.136136	0.281882	0.323258	0.323162	-9.563e-05	0.476908	0.128101
			BIEA	P53004	0	0	0	1	0.192146	0	0	0	1	0.192946	0.290396	0.290391	-4.95e-06	0.313253	0.37048
			BIM	O43521	9.787e-05	0.00010102	3.15e-06	0.139253	0.457208	21712	21908	196	0.133267	0.447742	0.301488	0.301586	9.805e-05	0.137966	0.284048
			BIN3	Q9NQY0	0	0	0	1	0.192146	0	0	0	1	0.192946	0.244669	0.244547	-0.00012176	0.398594	0.339125
			BIRC1	Q13075	5.37e-06	5.49e-06	1.2e-07	0.275932	0.300175	1472	1460	-12	0.295775	0.307953	0.27305	0.27272	-0.00032958	0.319277	0.498184
			BIRC2	Q13490	0.00044707	0.00042618	-2.089e-05	0.0491968	0.289058	142426	138906	-3520	0.11747	0.195811	0.304134	0.303287	-0.00084749	0.262312	0.272141
			BIRC3	Q13489	0.00042489	0.00043662	1.173e-05	0.0320963	0.286955	147766	149890	2124	0.0510511	0.18316	0.305394	0.304926	-0.00046839	0.289023	0.260199
			BIRC4	P98170	0.00095539	0.00098029	2.49e-05	0.0110664	0.158436	182786	181546	-1240	0.361251	0.153684	0.312952	0.312852	-9.938e-05	0.456	0.192908
			BIRC5	O15392	9.618e-05	9.821e-05	2.03e-06	0.265861	0.459992	21126	21140	14	0.354774	0.451857	0.311349	0.311352	3.6e-06	0.313568	0.207648
			BKRB1	P46663	0	0	0	1	0.192146	0	0	0	1	0.192946	0.239942	0.239844	-9.792e-05	0.448898	0.315476
			BKRB2	P30411	0.00048202	0.00048817	6.15e-06	0.228916	0.274746	73906	73624	-282	0.2249	0.300885	0.296306	0.296213	-9.237e-05	0.472306	0.322217
			BLK	P51451	0.0002468	0.00025001	3.21e-06	0.355711	0.349248	50738	50648	-90	0.302115	0.348009	0.307018	0.306938	-7.978e-05	0.456193	0.243934
			BLNK	Q8WV28	0.00015704	0.00016014	3.1e-06	0.182915	0.404311	40312	40586	274	0.164149	0.376213	0.329937	0.329978	4.08e-05	0.250752	0.0937156
			BLVRB	P30043	0	0	0	1	0.192146	0	0	0	1	0.192946	0.216103	0.216165	6.202e-05	0.118593	0.248509
			BMAL1	O00327	2.908e-05	3.086e-05	1.78e-06	0.0362538	0.422777	6672	7000	328	0.0180542	0.436035	0.297706	0.297648	-5.812e-05	0.430291	0.313367
			BMF	Q96LC9	1.168e-05	1.187e-05	1.9e-07	0.470884	0.343045	2950	2944	-6	0.49348	0.359023	0.284436	0.284322	-0.00011423	0.482482	0.409947
			BMP15	O95972	0	0	0	1	0.192146	0	0	0	1	0.192946	0.234518	0.234517	-1.18e-06	0.310241	0.29075
			BMP2	P12643	0.00039249	0.00038762	-4.87e-06	0.0776993	0.299434	71408	71750	342	0.0851703	0.304674	0.273114	0.272353	-0.00076099	0.274194	0.499473
			BMP3	P12645	1.3e-06	9.3e-07	-3.7e-07	0.0181818	0.22357	342	236	-106	0.0211907	0.226824	0.244669	0.243975	-0.00069378	0.261616	0.336178
			BMP3B	P55107	0	0	0	1	0.192146	0	0	0	1	0.192946	0.236003	0.235947	-5.592e-05	0.46994	0.296571
			BMP4	P12644	0.00011758	0.00012083	3.25e-06	0.0817356	0.43791	25648	26466	818	0.0503018	0.426766	0.255946	0.25593	-1.642e-05	0.344344	0.400034
			BMP5	P22003	3.89e-06	4.06e-06	1.7e-07	0.10161	0.282858	1416	1486	70	0.055332	0.309171	0.216983	0.216997	1.37e-05	0.255533	0.251102
			BMP6	P22004	4.419e-05	4.549e-05	1.3e-06	0.145602	0.460187	8858	8866	8	0.279116	0.460318	0.265762	0.265504	-0.00025715	0.376754	0.449276
			BMP7	P18075	0.00084736	0.00085222	4.86e-06	0.231388	0.178672	187262	185022	-2240	0.430584	0.150919	0.264161	0.263815	-0.00034557	0.328987	0.440544
			BMP8B	P34820	0.00014161	0.0001441	2.49e-06	0.165829	0.417498	19814	19982	168	0.114343	0.458843	0.294118	0.294238	0.00012068	0.123123	0.339283
			BMPR2	Q13873	0.0020319	0.00205963	2.773e-05	0.211635	0.0772524	316668	311788	-4880	0.184739	0.0937832	0.3068	0.306637	-0.0001631	0.464789	0.246923
			BMR1A	P36894	0.00072564	0.00073522	9.58e-06	0.109109	0.200699	128194	126492	-1702	0.298793	0.21118	0.277045	0.277067	2.188e-05	0.259779	0.465378
			BMR1B	O00238	0.00178119	0.00180695	2.576e-05	0.189569	0.0875256	322398	320946	-1452	0.229607	0.0906997	0.306339	0.306337	-2.19e-06	0.311245	0.249503
			BMX	P51813	0.00032805	0.00033895	1.09e-05	0.0955734	0.312338	96478	97970	1492	0.0680681	0.256326	0.337719	0.337616	-0.00010282	0.466	0.0653018
			BPA1	Q03001	0.00010705	0.00010906	2.01e-06	0.277387	0.451468	25202	25326	124	0.196393	0.431705	0.30233	0.302381	5.11e-05	0.20202	0.278239
			BPTF	Q12830	0	0	0	1	0.192146	0	0	0	1	0.192946	0.24326	0.243096	-0.00016406	0.369739	0.331716
			BRAF1	P15056	0.0011587	0.00117425	1.555e-05	0.232232	0.133972	245996	243896	-2100	0.321285	0.115777	0.347334	0.347361	2.738e-05	0.301508	0.0393718
			BRCA2	P51587	0.00106473	0.00107743	1.27e-05	0.240443	0.147099	181110	180384	-726	0.24498	0.154947	0.336212	0.336198	-1.344e-05	0.326942	0.0697118
			BRD7	Q9NPI1	3.66e-06	4.19e-06	5.3e-07	0.015121	0.284689	738	800	62	0.0261307	0.272735	0.267217	0.266367	-0.00084934	0.252515	0.455123
			BRD8	Q9H0E9	3.642e-05	3.946e-05	3.04e-06	0.0330661	0.446704	7558	7856	298	0.0694165	0.44786	0.300416	0.30027	-0.00014572	0.463317	0.29406
			BRMS1	Q9HCU9	0.00033579	0.00033871	2.92e-06	0.446894	0.312434	67326	65242	-2084	0.0793173	0.313803	0.308411	0.30823	-0.0001816	0.438315	0.234986
			BRPF3	Q9ULD4	1.54e-06	1.57e-06	3e-08	0.508016	0.238176	2502	2502	0	0.531124	0.346678	0.315315	0.315375	5.943e-05	0.202405	0.175121
			BST1	Q10588	0	0	0	1	0.192146	0	0	0	1	0.192946	0.273114	0.273023	-9.129e-05	0.462312	0.495213
			BTC	P35070	9.445e-05	9.864e-05	4.19e-06	0.0875252	0.459672	26950	27992	1042	0.0625	0.420183	0.294969	0.294717	-0.00025192	0.366733	0.333658
			BTF3	P20290	5.811e-05	6.15e-05	3.39e-06	0.0481444	0.491111	35932	36980	1048	0.027	0.387297	0.31054	0.310454	-8.584e-05	0.456281	0.215773
			BTG2	P78543	3.159e-05	3.208e-05	4.9e-07	0.436874	0.425849	6428	6428	0	0.495477	0.427049	0.291176	0.291275	9.881e-05	0.139418	0.362543
			BTG3	Q14201	0	0	0	1	0.192146	0	0	0	1	0.192946	0.245797	0.244808	-0.00098901	0.233936	0.340414
BTK		BTK	BTK	Q06187	0.00625959	0.00598699	-0.0002726	0.0473313	0.0263523	1079800	1019776	-60024	0.027027	0.028969	0.350886	0.346208	-0.00467807	0.209256	0.0421781
			BTLA	Q7Z6A9	4.17e-06	4.24e-06	7e-08	0.406627	0.285231	880	882	2	0.35	0.279359	0.281113	0.281003	-0.00011056	0.457831	0.437741
			BUB3	O43684	5.187e-05	5.672e-05	4.85e-06	0.0361809	0.483001	13294	13866	572	0.0594159	0.494878	0.301173	0.301032	-0.00014139	0.474798	0.28857
			C163A	Q86VB7	1.5e-06	1.61e-06	1.1e-07	0.0672016	0.239634	362	358	-4	0.310241	0.239026	0.287528	0.287288	-0.0002398	0.368104	0.38995
			C1QA	P02745	0.0016444	0.00163789	-6.51e-06	0.0885312	0.095914	204632	198314	-6318	0.0655903	0.142026	0.286435	0.285833	-0.00060173	0.288597	0.398456
			C1QB	P02746	0.00115656	0.00116435	7.79e-06	0.2751	0.135443	140256	137784	-2472	0.169014	0.196995	0.231339	0.2311	-0.00023953	0.329648	0.279549
C1QBP			C1QBP	Q07021	0.00338979	0.00329232	-9.747e-05	0.0664653	0.0481466	700736	651464	-49272	0.0470942	0.0452615	0.351777	0.350509	-0.00126749	0.245737	0.0354042
			C1QC	P02747	3.473e-05	3.531e-05	5.8e-07	0.195783	0.435737	4338	4356	18	0.191532	0.393761	0.234963	0.23474	-0.00022254	0.353707	0.292142
			C1QT1	Q9BXJ1	0	0	0	1	0.192146	0	0	0	1	0.192946	0.237801	0.237822	2.104e-05	0.263581	0.305385
			C1R	P00736	0.00083513	0.00084408	8.95e-06	0.267137	0.179849	105412	103232	-2180	0.126506	0.24694	0.277911	0.27767	-0.00024123	0.364458	0.461478
			C1S	P09871	1.04e-06	1.08e-06	4e-08	0.184476	0.227166	208	214	6	0.13253	0.224983	0.244066	0.243871	-0.00019432	0.337349	0.335611
			C1TC	P11586	6.999e-05	7.255e-05	2.56e-06	0.141709	0.493537	27912	28458	546	0.0601202	0.418658	0.309596	0.30956	-3.593e-05	0.381764	0.222622
			C2TA	P33076	0.00011155	0.00011938	7.83e-06	0.0331992	0.438701	20160	21052	892	0.0361083	0.452486	0.291544	0.291349	-0.00019471	0.41809	0.362016
			C3AR	Q16581	4.69e-06	4.74e-06	5e-08	0.440644	0.290599	790	776	-14	0.154309	0.2709	0.234661	0.234613	-4.821e-05	0.464393	0.291347
			C5AR	P21730	0.00064869	0.0006548	6.11e-06	0.392354	0.219518	112232	111084	-1148	0.369849	0.231637	0.300364	0.300166	-0.00019839	0.412651	0.294625
			C5ARL	Q9P296	1.826e-05	1.856e-05	3e-07	0.346425	0.377933	2810	2810	0	0.320603	0.355959	0.246234	0.246191	-4.24e-05	0.467936	0.345825
			C8AP2	Q9UKL3	1.884e-05	1.922e-05	3.8e-07	0.154463	0.38374	3882	3854	-28	0.400602	0.383887	0.286033	0.28588	-0.00015229	0.446231	0.398179
			CA2D2	Q9NY47	0	0	0	1	0.192146	0	0	0	1	0.192946	0.236003	0.235947	-5.592e-05	0.466196	0.296571
			CAB45	Q9BRK5	8.06e-06	8.33e-06	2.7e-07	0.110664	0.320618	812	840	28	0.0994975	0.276943	0.266027	0.266038	1.116e-05	0.280684	0.452628
			CABIN	Q9Y6J0	0.00028544	0.0003071	2.166e-05	0.0180905	0.325498	48194	49078	884	0.0561122	0.351767	0.303841	0.303661	-0.00017953	0.438066	0.270093
			CABL1	Q8TDN4	9.203e-05	9.349e-05	1.46e-06	0.39759	0.466013	19264	19258	-6	0.376008	0.46503	0.307781	0.307761	-2.004e-05	0.324924	0.237849
			CAC1A	O00555	0.00062922	0.00063596	6.74e-06	0.0561122	0.224442	94426	92684	-1742	0.165663	0.265926	0.263819	0.263836	1.656e-05	0.274194	0.440677
			CAC1B	Q00975	0.00022414	0.00023013	5.99e-06	0.0673367	0.358126	35050	35328	278	0.0935614	0.392503	0.273956	0.274045	8.823e-05	0.140562	0.485169
			CAC1C	Q13936	0.0006558	0.00065889	3.09e-06	0.207831	0.218933	103806	98798	-5008	0.0100503	0.255253	0.291593	0.291152	-0.00044094	0.326326	0.363566
			CAC1D	Q01668	6.47e-06	6.62e-06	1.5e-07	0.131712	0.310189	928	926	-2	0.561245	0.282046	0.238292	0.237987	-0.00030514	0.283702	0.306619
			CAC1F	O60840	0	0	0	1	0.192146	0	0	0	1	0.192946	0.277444	0.277446	2.25e-06	0.297595	0.463006
			CAC1H	O95180	0	0	0	1	0.192146	0	0	0	1	0.192946	0.2328	0.232725	-7.551e-05	0.492477	0.284357
			CAC1I	Q9P0X4	0	0	0	1	0.192146	0	0	0	1	0.192946	0.249442	0.24942	-2.179e-05	0.362538	0.368247
			CAC1S	Q13698	0	0	0	1	0.192146	0	0	0	1	0.192946	0.220406	0.220415	9.13e-06	0.269809	0.254715
			CACB1	Q02641	7.002e-05	7.118e-05	1.16e-06	0.325301	0.495547	8294	8240	-54	0.37249	0.452103	0.267733	0.267672	-6.051e-05	0.425852	0.464791
			CACB2	Q08289	0.00012396	0.0001175	-6.46e-06	0.0262097	0.440417	16356	15768	-588	0.0581162	0.484745	0.271637	0.270364	-0.0012732	0.223116	0.484851
			CACB3	P54284	1.23e-06	1.24e-06	1e-08	0.414243	0.23034	248	242	-6	0.116583	0.227198	0.231	0.230728	-0.00027202	0.328987	0.278038
			CACB4	O00305	0	0	0	1	0.192146	0	0	0	1	0.192946	0.20876	0.208771	1.046e-05	0.273092	0.233696
			CACO2	Q13137	0.00077526	0.00078181	6.55e-06	0.371486	0.189442	106334	105342	-992	0.200602	0.242725	0.309209	0.309088	-0.00012171	0.482932	0.226804
			CAD15	P55291	4.95e-06	5.09e-06	1.4e-07	0.152064	0.296294	1310	1310	0	0.476908	0.299625	0.285021	0.284698	-0.00032288	0.337349	0.407942
			CAD17	Q12864	0	0	0	1	0.192146	0	0	0	1	0.192946	0.276162	0.275912	-0.00024981	0.364824	0.475122
CADH1			CADH1	P12830	0.00730606	0.00742439	0.00011833	0.170854	0.019413	1291818	1285578	-6240	0.300503	0.0240147	0.363169	0.363195	2.562e-05	0.297189	0.019215
			CADH2	P19022	0.00087985	0.00089321	1.336e-05	0.0948537	0.17208	153218	152798	-420	0.212851	0.180186	0.317832	0.317762	-6.94e-05	0.410696	0.159592
			CADH3	P22223	8.72e-06	8.84e-06	1.2e-07	0.503525	0.324789	2130	2128	-2	0.439196	0.332897	0.295447	0.295451	3.85e-06	0.28629	0.327894
			CADH4	P55283	0	0	0	1	0.192146	0	0	0	1	0.192946	0.241194	0.241155	-3.986e-05	0.40603	0.323108
			CADH5	P33151	0.00125907	0.00126841	9.34e-06	0.33501	0.124087	199606	195190	-4416	0.126135	0.144207	0.318562	0.31835	-0.00021212	0.39397	0.156261
			CADM1	Q9BY67	1.909e-05	1.923e-05	1.4e-07	0.276553	0.38374	2098	2070	-28	0.262312	0.330715	0.242257	0.242173	-8.421e-05	0.49498	0.328224
			CAF1A	Q13111	0.00054593	0.00056403	1.81e-05	0.103726	0.258009	101126	102052	926	0.351406	0.249395	0.320388	0.320246	-0.00014272	0.475426	0.146165
			CAH12	O43570	0	0	0	1	0.192146	0	0	0	1	0.192946	0.242919	0.242822	-9.737e-05	0.455366	0.329825
			CAH9	Q16790	0	0	0	1	0.192146	0	0	0	1	0.192946	0.283343	0.283152	-0.00019052	0.415323	0.41897
			CALC	P01258	6.23e-06	6.32e-06	9e-08	0.479397	0.307986	666	666	0	0.518109	0.263289	0.236261	0.236304	4.298e-05	0.199396	0.298488
			CALCA	P06881	0	0	0	1	0.192146	0	0	0	1	0.192946	0.215097	0.215098	9.6e-07	0.282129	0.246222
			CALCR	P30988	0.00011669	0.00011914	2.45e-06	0.289157	0.438866	19962	19318	-644	0.0591775	0.464631	0.295019	0.294415	-0.00060465	0.270981	0.336974
			CALD1	Q05682	3.661e-05	3.727e-05	6.6e-07	0.436747	0.440724	19206	19292	86	0.322613	0.464806	0.32128	0.321052	-0.00022741	0.360721	0.140973
			CALL3	P27482	0	0	0	1	0.192146	0	0	0	1	0.192946	0.22944	0.229115	-0.00032445	0.27984	0.273044
			CALL5	Q9NZT1	1.512e-05	1.529e-05	1.7e-07	0.252758	0.361289	2120	2096	-24	0.21665	0.331476	0.281136	0.281117	-1.862e-05	0.364824	0.43693
CALR			CALR	P27797	0.00533279	0.00541987	8.708e-05	0.203015	0.0285776	858742	848504	-10238	0.333669	0.0352838	0.33231	0.332111	-0.0001992	0.416416	0.085198
			CALRL	Q16602	0.0007713	0.00077656	5.26e-06	0.466934	0.190537	139470	135770	-3700	0.0620621	0.198795	0.274021	0.274023	1.42e-06	0.277946	0.48533
			CALX	P27824	0.00337509	0.00338631	1.122e-05	0.260521	0.0469374	466142	456178	-9964	0.18794	0.0639499	0.318885	0.318321	-0.00056405	0.284422	0.15643
			CAMLG	P49069	4.339e-05	4.412e-05	7.3e-07	0.239719	0.457996	6474	6440	-34	0.472472	0.427314	0.292825	0.292637	-0.00018784	0.401615	0.353437
			CAN1	P07384	0.00281585	0.00267573	-0.00014012	0.0653266	0.0597131	420870	393070	-27800	0.0651956	0.0743381	0.332119	0.331567	-0.00055195	0.291457	0.0875691
			CAN2	P17655	0.00022122	0.0002255	4.28e-06	0.256798	0.360556	31274	31322	48	0.255255	0.407338	0.293619	0.293536	-8.345e-05	0.471241	0.34742
			CANB1	P63098	6.263e-05	6.604e-05	3.41e-06	0.11011	0.497689	11098	11360	262	0.156627	0.485169	0.2928	0.292588	-0.00021285	0.395372	0.3538
			CAND1	Q86VP6	1.263e-05	1.325e-05	6.2e-07	0.0799595	0.350342	3000	3098	98	0.0745968	0.364224	0.292875	0.292687	-0.00018758	0.417505	0.353063
			CAP1	Q01518	7.14e-06	7.37e-06	2.3e-07	0.124248	0.315421	1706	1732	26	0.104208	0.317673	0.283436	0.283362	-7.343e-05	0.469161	0.417029
			CAPR1	Q14444	8.593e-05	8.866e-05	2.73e-06	0.135271	0.471424	16650	16740	90	0.250752	0.480603	0.300833	0.300454	-0.00037957	0.334004	0.293003
			CAR11	Q9BXL7	3.113e-05	3.215e-05	1.02e-06	0.155936	0.426149	7560	7624	64	0.177062	0.44564	0.29863	0.298474	-0.00015585	0.454728	0.305834
			CARD6	Q9BX69	2.51e-06	2.57e-06	6e-08	0.273642	0.257289	718	710	-8	0.257286	0.266286	0.256173	0.256006	-0.00016735	0.396586	0.400594
			CARD8	Q9Y2G2	0.00100682	0.00101292	6.1e-06	0.316213	0.153373	158398	154764	-3634	0.0873494	0.178028	0.288126	0.287793	-0.00033309	0.336016	0.387022
			CARD9	Q9H257	0	0	0	1	0.192146	0	0	0	1	0.192946	0.240692	0.240548	-0.00014395	0.405812	0.319905
			CARM1	Q86X55	7.686e-05	7.385e-05	-3.01e-06	0.063	0.492205	15774	13078	-2696	0.0220884	0.499523	0.306502	0.300192	-0.00630968	0.21371	0.294482
			CASB	P05814	3.475e-05	3.526e-05	5.1e-07	0.262048	0.435391	5030	5026	-4	0.230382	0.404763	0.281707	0.281669	-3.793e-05	0.358074	0.431657
			CASL	Q14511	0.00095026	0.00096767	1.741e-05	0.215292	0.160205	217448	218098	650	0.161647	0.12707	0.334944	0.335086	0.00014125	0.138973	0.0739878
			CASP1	P29466	0.00190994	0.0016223	-0.00028764	0.00401204	0.0966489	313406	269894	-43512	0.00902708	0.105758	0.327041	0.32607	-0.00097058	0.254016	0.111678
			CASP2	P42575	0.00031703	0.00032217	5.14e-06	0.275275	0.319412	61728	60378	-1350	0.110775	0.325409	0.304964	0.304629	-0.00033518	0.335678	0.262609
CASP3			CASP3	P42574	0.0100597	0.0102927	0.00023301	0.0996979	0.0123197	1837728	1832982	-4746	0.193159	0.0134478	0.365121	0.365199	7.776e-05	0.20662	0.0169975
			CASP4	P49662	0.00094122	0.00087221	-6.901e-05	0.0461384	0.175442	131886	121944	-9942	0.0523139	0.215814	0.308961	0.307926	-0.00103493	0.234234	0.236878
			CASP5	P51878	8.37e-06	7.79e-06	-5.8e-07	0.0401204	0.317442	890	868	-22	0.144724	0.278398	0.257105	0.256655	-0.00044972	0.277555	0.405904
			CASP6	P55212	0.00044227	0.00046268	2.041e-05	0.0711423	0.281363	103580	106580	3000	0.168506	0.240834	0.323983	0.323892	-9.12e-05	0.448345	0.123718
			CASP7	P55210	0.00141255	0.00147233	5.978e-05	0.0664653	0.106698	300666	303750	3084	0.117588	0.0958937	0.340775	0.340691	-8.41e-05	0.441767	0.0549048
CASP8			CASP8	Q14790	0.00502697	0.00520588	0.00017891	0.0562814	0.0299263	1055026	1070500	15474	0.0971944	0.0281444	0.360262	0.36023	-3.176e-05	0.354062	0.0224308
			CASP9	P55211	0.00120377	0.00123661	3.284e-05	0.149448	0.126807	250040	251790	1750	0.108761	0.112318	0.333815	0.333689	-0.00012623	0.487462	0.078775
			CASPA	Q92851	0.00032963	0.00033667	7.04e-06	0.232698	0.313099	75406	75274	-132	0.345035	0.299088	0.318767	0.318379	-0.00038782	0.328987	0.156075
			CASR	P41180	3.13e-06	3.16e-06	3e-08	0.292707	0.264587	1382	1374	-8	0.315261	0.303696	0.295019	0.295096	7.686e-05	0.179539	0.330468
			CATA	P04040	9e-06	9.13e-06	1.3e-07	0.366566	0.327131	2110	2108	-2	0.336354	0.331928	0.291005	0.290931	-7.468e-05	0.451256	0.365895
			CATB	P07858	0.00057462	0.0006168	4.218e-05	0.0441767	0.231946	87080	88988	1908	0.100402	0.274362	0.289136	0.288977	-0.00015893	0.435306	0.379117
			CATC	P53634	5.31e-06	4.93e-06	-3.8e-07	0.0433468	0.293546	842	774	-68	0.0492958	0.270808	0.256477	0.255911	-0.0005659	0.269889	0.399883
			CATD	P07339	0.0004064	0.00041809	1.169e-05	0.10161	0.290616	51980	52380	400	0.144008	0.343275	0.295598	0.295476	-0.00012201	0.495477	0.327705
			CATG	P08311	0.00092159	0.00102025	9.866e-05	0.0130391	0.152565	141474	141944	470	0.235944	0.192899	0.304375	0.304037	-0.00033781	0.364092	0.267421
			CATK	P43235	3.829e-05	4.098e-05	2.69e-06	0.0474747	0.45077	4742	4878	136	0.0877016	0.401819	0.252754	0.252513	-0.00024102	0.341	0.384145
			CATL1	P07711	0.00193073	0.00184727	-8.346e-05	0.064257	0.0861199	234592	216634	-17958	0.0342397	0.1279	0.304428	0.302886	-0.00154173	0.227912	0.274426
			CATS	P25774	0.00021267	0.00021568	3.01e-06	0.232089	0.366635	24538	24338	-200	0.397384	0.436596	0.273805	0.273587	-0.00021766	0.376387	0.489043
CAV1			CAV1	Q03135	0.010725	0.0106972	-2.787e-05	0.202417	0.0116822	1912012	1876718	-35294	0.274194	0.0128121	0.375691	0.375518	-0.00017299	0.466332	0.00784271
			CAV2	P51636	0.00046772	0.00047187	4.15e-06	0.383534	0.278891	70528	69898	-630	0.48998	0.307618	0.315143	0.315086	-5.72e-05	0.404427	0.177076
			CAV3	P56539	0.00029732	0.00030058	3.26e-06	0.490471	0.327909	55842	55278	-564	0.276939	0.337301	0.298681	0.298551	-0.00012967	0.483936	0.305053
			CAZA2	P47755	5.39e-06	5.53e-06	1.4e-07	0.331325	0.300677	2518	2542	24	0.30993	0.348358	0.294743	0.294843	0.00010013	0.141424	0.332417
			CB018	Q8N357	0.00063479	0.00063983	5.04e-06	0.243	0.223498	89476	87812	-1664	0.168844	0.277103	0.254986	0.255001	1.509e-05	0.254271	0.395532
CBL			CBL	P22681	0.00579449	0.00591324	0.00011875	0.140704	0.0265396	1199114	1200836	1722	0.138415	0.025356	0.371821	0.371746	-7.46e-05	0.412651	0.0105153
			CBLB	Q13191	0.00029536	0.00029589	5.3e-07	0.205823	0.329452	79150	78432	-718	0.299799	0.293921	0.331484	0.331248	-0.00023558	0.410282	0.0888766
			CBLC	Q9ULV8	3.838e-05	3.944e-05	1.06e-06	0.0982949	0.446704	12082	12140	58	0.167671	0.491118	0.325536	0.325608	7.228e-05	0.205617	0.114727
			CBPE	P16870	0.00019123	0.00019497	3.74e-06	0.18429	0.380334	23220	23052	-168	0.350453	0.442141	0.25056	0.250473	-8.742e-05	0.498489	0.373622
			CBS	P35520	3.41e-06	3.49e-06	8e-08	0.279397	0.271849	694	694	0	0.670695	0.265003	0.26617	0.2661	-7.019e-05	0.461771	0.453092
			CBX5	P45973	0.00050207	0.00054645	4.438e-05	0.00803213	0.262068	100258	105480	5222	0.239196	0.242481	0.297655	0.297494	-0.00016132	0.444779	0.314629
			CC063	Q9UK61	0	0	0	1	0.192146	0	0	0	1	0.192946	0.241548	0.241527	-2.067e-05	0.368474	0.325024
			CC14A	Q9UNH5	1.106e-05	1.126e-05	2e-07	0.274648	0.338877	2574	2584	10	0.208249	0.350074	0.278515	0.278434	-8.068e-05	0.456566	0.456075
			CC14B	O60729	2.516e-05	2.559e-05	4.3e-07	0.418675	0.409107	5404	5424	20	0.247247	0.410216	0.286624	0.286618	-5.83e-06	0.301108	0.393451
			CCBP2	O00590	0.00014737	0.00010533	-4.204e-05	0.011022	0.45386	30678	22972	-7706	0.0151822	0.44251	0.24479	0.240817	-0.00397265	0.220322	0.321498
			CCD50	Q8IVM0	0	0	0	1	0.192146	0	0	0	1	0.192946	0.251342	0.251003	-0.00033924	0.284422	0.376323
			CCDC6	Q16204	0	0	0	1	0.192146	0	0	0	1	0.192946	0.273438	0.273435	-2.48e-06	0.327309	0.490505
			CCG2	Q9Y698	6.135e-05	6.218e-05	8.3e-07	0.488419	0.491935	8450	8260	-190	0.172691	0.452385	0.283459	0.282525	-0.00093394	0.248497	0.42496
			CCKAR	P32238	1.488e-05	1.507e-05	1.9e-07	0.431156	0.359885	2538	2514	-24	0.406814	0.347158	0.253568	0.253592	2.418e-05	0.251008	0.388566
			CCKN	P06307	1.156e-05	1.175e-05	1.9e-07	0.291037	0.34216	2414	2424	10	0.202405	0.343567	0.241598	0.241629	3.054e-05	0.224346	0.325784
			CCL1	P22362	3.204e-05	3.453e-05	2.49e-06	0.0421264	0.433331	16152	19224	3072	0.0130391	0.465269	0.227571	0.226835	-0.00073588	0.240201	0.267451
			CCL11	P51671	6.045e-05	6.597e-05	5.52e-06	0.0512048	0.497535	24828	25590	762	0.0641283	0.430712	0.249137	0.248861	-0.00027594	0.29596	0.363998
			CCL13	Q99616	0.00015637	0.00013956	-1.681e-05	0.0291165	0.421184	42060	37584	-4476	0.0603622	0.385489	0.256401	0.254718	-0.00168309	0.221665	0.394437
			CCL14	Q16627	0.00024286	0.00027807	3.521e-05	0.0331658	0.337017	52754	59494	6740	0.0250752	0.327476	0.279864	0.279815	-4.966e-05	0.397796	0.447397
			CCL15	Q16663	1.32e-06	1.46e-06	1.4e-07	0.0522613	0.236243	650	662	12	0.123867	0.263012	0.229805	0.229115	-0.00068965	0.243216	0.273044
			CCL16	O15467	0.00025487	0.00027305	1.818e-05	0.0261044	0.338635	110768	127672	16904	0.0372608	0.210038	0.248815	0.24852	-0.00029531	0.299292	0.360932
			CCL17	Q92583	8.815e-05	9.021e-05	2.06e-06	0.138105	0.469659	19052	20466	1414	0.0291457	0.455648	0.228607	0.22754	-0.00106708	0.244	0.269605
			CCL18	P55774	1.714e-05	1.928e-05	2.14e-06	0.00604839	0.383741	6106	6522	416	0.021148	0.428845	0.295699	0.295577	-0.00012142	0.484453	0.327098
			CCL19	Q99731	4.983e-05	5.134e-05	1.51e-06	0.0885312	0.473552	7060	7136	76	0.0767677	0.438678	0.239064	0.238713	-0.00035163	0.283567	0.310295
			CCL2	P13500	0.00038075	0.00037682	-3.93e-06	0.080402	0.302252	87320	83626	-3694	0.107322	0.284763	0.26252	0.26159	-0.00092998	0.235471	0.430155
			CCL20	P78556	0.00073228	0.00074023	7.95e-06	0.129129	0.199572	115576	113528	-2048	0.154618	0.227694	0.282765	0.282548	-0.00021679	0.359879	0.424732
			CCL21	O00585	8.048e-05	8.56e-05	5.12e-06	0.0462777	0.475312	11586	12016	430	0.0630631	0.490193	0.250162	0.249927	-0.00023505	0.319235	0.371396
			CCL22	O00626	1.972e-05	1.942e-05	-3e-07	0.0773092	0.385237	2230	2096	-134	0.0251509	0.331476	0.228502	0.227661	-0.00084115	0.247734	0.26998
			CCL23	P55773	0	0	0	1	0.192146	0	0	0	1	0.192946	0.227467	0.226731	-0.0007359	0.240161	0.267266
			CCL24	O00175	0	0	0	1	0.192146	0	0	0	1	0.192946	0.211126	0.210314	-0.00081194	0.23494	0.235774
			CCL25	O15444	0.00058179	0.00058586	4.07e-06	0.235116	0.243951	93460	92418	-1042	0.497976	0.266464	0.237069	0.236661	-0.0004078	0.250503	0.299856
			CCL26	Q9Y258	1.32e-06	1.46e-06	1.4e-07	0.0522088	0.236243	650	662	12	0.125251	0.263012	0.229805	0.229115	-0.00068965	0.243216	0.273044
			CCL27	Q9Y4X3	1.95e-06	2.14e-06	1.9e-07	0.0704935	0.250338	538	604	66	0.00908174	0.259873	0.237004	0.236596	-0.000408	0.250752	0.299761
			CCL28	Q9NRJ3	4.71e-06	5.09e-06	3.8e-07	0.0543807	0.296294	1392	1506	114	0.0541625	0.309486	0.238079	0.237707	-0.0003717	0.254016	0.304489
			CCL4	P13236	0.00025709	0.00024346	-1.363e-05	0.0181087	0.352079	106846	116428	9582	0.0571142	0.222508	0.251707	0.249023	-0.0026838	0.214718	0.365404
			CCL5	P13501	0.00273399	0.002833	9.901e-05	0.0753012	0.0575017	420912	429298	8386	0.0651956	0.0691063	0.304669	0.303983	-0.00068591	0.238191	0.267852
			CCL7	P80098	0.00057248	0.0005864	1.392e-05	0.169679	0.243799	115792	115620	-172	0.299497	0.223564	0.271616	0.270512	-0.00110316	0.236181	0.485848
			CCL8	P80075	0.00013317	0.00015212	1.895e-05	0.0291751	0.411837	44758	48792	4034	0.0171198	0.352233	0.2542	0.254003	-0.0001966	0.353059	0.391394
			CCNA1	P78396	0.00073646	0.00075463	1.817e-05	0.132056	0.19618	144068	144420	352	0.174524	0.190216	0.323499	0.323466	-3.337e-05	0.38794	0.126419
			CCNA2	P20248	0.00083145	0.00088519	5.374e-05	0.0310621	0.173396	189038	192274	3236	0.0571142	0.145662	0.332119	0.332079	-4.013e-05	0.394763	0.0853604
			CCNB1	P14635	0.00062599	0.00064374	1.775e-05	0.136546	0.222709	129142	128750	-392	0.407855	0.20892	0.315459	0.315346	-0.000113	0.461229	0.175334
			CCND1	P24385	0.0018398	0.00194614	0.00010634	0.0100908	0.0821254	417108	423404	6296	0.0301508	0.0702563	0.346639	0.346696	5.755e-05	0.257545	0.0409156
			CCND2	P30279	0.0001113	0.00011444	3.14e-06	0.10743	0.443832	29974	29868	-106	0.315261	0.413499	0.298167	0.298138	-2.939e-05	0.391919	0.308574
			CCND3	P30281	0.00031186	0.00031989	8.03e-06	0.130785	0.320528	61916	61808	-108	0.225579	0.320822	0.302699	0.302753	5.37e-05	0.227823	0.275505
			CCNE1	P24864	0.00041673	0.00041594	-7.9e-07	0.17002	0.291096	88900	85224	-3676	0.149043	0.282496	0.319002	0.317586	-0.00141576	0.242699	0.160509
			CCNE2	O96020	1.015e-05	1.035e-05	2e-07	0.256798	0.334454	3016	3014	-2	0.34004	0.36157	0.278739	0.278682	-5.675e-05	0.438315	0.454819
			CCNF	P41002	0	0	0	1	0.192146	0	0	0	1	0.192946	0.266949	0.266967	1.742e-05	0.285714	0.460496
			CCNG1	P51959	3.232e-05	3.341e-05	1.09e-06	0.0743719	0.430459	6040	6170	130	0.0561122	0.422092	0.30039	0.30027	-0.00011968	0.495968	0.29406
			CCNH	P51946	7.156e-05	7.481e-05	3.25e-06	0.0542714	0.491019	15126	15228	102	0.143863	0.48755	0.307726	0.307679	-4.791e-05	0.386089	0.238388
			CCNT2	O60583	9.35e-06	1.134e-05	1.99e-06	0.00401606	0.339365	2064	2348	284	0.0201207	0.341086	0.276824	0.276311	-0.00051301	0.278112	0.471331
			CCR1	P32246	0.0028745	0.00287871	4.21e-06	0.109328	0.0563053	562000	563060	1060	0.0873494	0.0522677	0.294418	0.293186	-0.00123185	0.23671	0.349857
CCR10		CCR10	CCR10	P46092	0.00417184	0.00425286	8.102e-05	0.039196	0.0367331	626710	624262	-2448	0.186373	0.0474656	0.308989	0.308893	-9.528e-05	0.447791	0.228776
			CCR2	P41597	0.00044974	0.00046594	1.62e-05	0.0824121	0.280722	122280	124630	2350	0.0848485	0.213563	0.295271	0.295071	-0.00019984	0.411469	0.330666
			CCR3	P51677	0.00231517	0.00230768	-7.49e-06	0.0950951	0.0677341	459344	445950	-13394	0.0993976	0.0655822	0.267609	0.266306	-0.00130329	0.231928	0.454607
			CCR4	P51679	0.00032921	0.00031219	-1.702e-05	0.0412475	0.323871	55952	51820	-4132	0.0431294	0.344668	0.266334	0.265157	-0.00117682	0.251004	0.447761
CCR5			CCR5	P51681	0.00551296	0.00554889	3.593e-05	0.343719	0.0281625	1286344	1282438	-3906	0.177533	0.0241521	0.329561	0.329032	-0.00052895	0.284708	0.0978319
			CCR6	P51684	0	0	0	1	0.192146	0	0	0	1	0.192946	0.220448	0.220316	-0.00013169	0.365462	0.254532
			CCR7	P32248	4.9e-07	5e-07	1e-08	0.14343	0.210674	74	74	0	0.818365	0.202601	0.236972	0.236905	-6.619e-05	0.465327	0.300684
			CCR8	P51685	6.51e-06	7.26e-06	7.5e-07	0.0451807	0.314829	2168	2338	170	0.0342052	0.340884	0.203488	0.201818	-0.00167072	0.227455	0.222419
			CCR9	P51686	0	0	0	1	0.192146	0	0	0	1	0.192946	0.191648	0.191382	-0.00026652	0.256281	0.192337
			CCRL1	Q9NPB9	5.051e-05	4.895e-05	-1.56e-06	0.0810811	0.467234	13498	13058	-440	0.108891	0.499306	0.238161	0.23756	-0.00060117	0.239719	0.303514
			CD027	Q9NWY4	4.6e-07	5.8e-07	1.2e-07	0.00504032	0.214649	150	182	32	0.00504541	0.221505	0.252643	0.250582	-0.00206068	0.220989	0.374107
			CD14	P08571	0.00031923	0.00032413	4.9e-06	0.190332	0.318659	42974	42542	-432	0.38755	0.371237	0.265986	0.265935	-5.078e-05	0.435872	0.451876
			CD166	Q13740	2.154e-05	2.189e-05	3.5e-07	0.316901	0.397269	2552	2552	0	0.228141	0.348776	0.290274	0.290072	-0.00020146	0.39318	0.373229
			CD19	P15391	0.00075681	0.00077531	1.85e-05	0.0972919	0.190828	153730	153992	262	0.178536	0.178566	0.332183	0.332207	2.44e-05	0.27008	0.0845997
			CD1A	P06126	6.2e-06	6.22e-06	2e-08	0.215509	0.306911	1316	1318	2	0.294589	0.30049	0.240575	0.24043	-0.00014459	0.394366	0.319441
			CD1B	P29016	6.2e-06	6.22e-06	2e-08	0.215509	0.306911	1316	1318	2	0.294	0.30049	0.240575	0.24043	-0.00014459	0.394183	0.319441
			CD1C	P29017	0	0	0	1	0.192146	0	0	0	1	0.192946	0.23368	0.233514	-0.00016528	0.358434	0.287524
			CD1D	P15813	0.00048566	0.00049023	4.57e-06	0.424	0.274023	84300	83556	-744	0.476861	0.284898	0.277178	0.277067	-0.0001111	0.459677	0.465378
			CD1E	P15812	0	0	0	1	0.192146	0	0	0	1	0.192946	0.223808	0.22371	-9.842e-05	0.460222	0.260645
			CD2	P06729	0.00065838	0.00066428	5.9e-06	0.269539	0.217444	114128	113696	-432	0.214859	0.227406	0.311797	0.311578	-0.00021919	0.398594	0.205921
			CD20	P11836	0.00013212	0.00013457	2.45e-06	0.305136	0.425921	37602	37452	-150	0.492958	0.385847	0.313575	0.313536	-3.85e-05	0.407035	0.188066
			CD209	Q9NNX6	8.6e-07	8.5e-07	-1e-08	0.0785498	0.221378	162	158	-4	0.140421	0.217366	0.232005	0.231878	-0.00012716	0.405812	0.281979
			CD22	P20273	0.00050512	0.00051275	7.63e-06	0.187123	0.268831	78948	78686	-262	0.278112	0.2933	0.320388	0.320454	6.598e-05	0.198789	0.145053
			CD226	Q15762	0.00012481	0.00012541	6e-07	0.269889	0.434182	15442	15280	-162	0.322289	0.487272	0.281478	0.281393	-8.54e-05	0.438755	0.434152
			CD244	Q9BZW8	1.07e-05	1.086e-05	1.6e-07	0.438315	0.336386	2022	2022	0	0.391	0.329121	0.262162	0.262288	0.00012522	0.0611836	0.432866
			CD27	P26842	0.00058619	0.00059014	3.95e-06	0.38253	0.243025	117718	114582	-3136	0.0894472	0.225577	0.277156	0.276866	-0.00028951	0.353414	0.466929
			CD28	P10747	0.00173568	0.00124173	-0.00049395	0.00704225	0.126519	324188	239766	-84422	0.0100503	0.117561	0.317192	0.316972	-0.0002194	0.397192	0.164363
			CD2A1	P42771	0.00139669	0.00142811	3.142e-05	0.153535	0.110945	308834	307170	-1664	0.477477	0.0948475	0.333815	0.333786	-2.915e-05	0.352352	0.0783911
			CD2A2	Q8N726	0.00028017	0.00028817	8e-06	0.134208	0.332364	72724	73362	638	0.116751	0.30134	0.315603	0.315606	3.58e-06	0.306225	0.173585
			CD2AP	Q9Y5K6	0.00087146	0.00088037	8.91e-06	0.299094	0.174351	167416	165210	-2206	0.204614	0.170222	0.328779	0.328906	0.00012706	0.144869	0.0982343
			CD33	P20138	0	0	0	1	0.192146	0	0	0	1	0.192946	0.297093	0.297031	-6.196e-05	0.437186	0.317548
			CD34	P28906	2.2e-06	2.24e-06	4e-08	0.498489	0.251753	486	486	0	0.607863	0.250043	0.283019	0.283059	4.034e-05	0.263052	0.41986
			CD36	P16671	0.00039826	0.00040984	1.158e-05	0.135271	0.293032	100526	101630	1104	0.418933	0.250439	0.315718	0.315577	-0.00014039	0.498489	0.173828
			CD38	P28907	0.00080778	0.00081935	1.157e-05	0.17505	0.183113	181678	179518	-2160	0.374749	0.155919	0.283668	0.283619	-4.864e-05	0.410231	0.414625
			CD3D	P04234	0.00026713	0.00026481	-2.32e-06	0.0613682	0.341807	37230	35232	-1998	0.0261307	0.392915	0.282926	0.282363	-0.00056384	0.284274	0.426502
			CD3E	P07766	0.00059654	0.0006053	8.76e-06	0.0761523	0.236487	102316	101416	-900	0.336683	0.250903	0.314885	0.314827	-5.883e-05	0.411883	0.179044
			CD3G	P09693	0	0	0	1	0.192146	0	0	0	1	0.192946	0.243825	0.243733	-9.203e-05	0.463243	0.335016
			CD3Z	P20963	0.00109646	0.0011026	6.14e-06	0.274824	0.144392	201762	198858	-2904	0.207452	0.14167	0.326026	0.326009	-1.688e-05	0.327655	0.112037
CD4			CD4	P01730	0.00560824	0.00571157	0.00010333	0.0970971	0.0275447	1189158	1160852	-28306	0.169849	0.0267548	0.351848	0.351404	-0.00044431	0.32998	0.0340478
			CD40L	P29965	0.00019776	0.00020214	4.38e-06	0.0943775	0.374685	24948	24952	4	0.165663	0.433394	0.289305	0.289292	-1.218e-05	0.31996	0.377357
CD44		CD44	CD44	P16070	0.0037531	0.00352874	-0.00022436	0.0371486	0.0448049	661018	606344	-54674	0.033	0.0490996	0.340976	0.340725	-0.00025158	0.372745	0.0547995
			CD45	P08575	0.00196964	0.00198778	1.814e-05	0.46875	0.0799859	333040	328980	-4060	0.265531	0.0884149	0.338412	0.338347	-6.535e-05	0.425276	0.0620068
			CD47	Q08722	0.00088305	0.00089908	1.603e-05	0.0991984	0.17119	134676	134128	-548	0.192735	0.200818	0.297629	0.297339	-0.00028995	0.373869	0.31574
			CD48	P09326	0.00069759	0.00070695	9.36e-06	0.148335	0.208335	104990	104286	-704	0.410463	0.244671	0.299766	0.299747	-1.897e-05	0.341365	0.2971
			CD5	P06127	0.00059558	0.00060654	1.096e-05	0.179255	0.236163	108956	108986	30	0.258776	0.235946	0.328436	0.328498	6.178e-05	0.25328	0.0999613
			CD59	P13987	0.00217776	0.00220158	2.382e-05	0.211847	0.0708566	334378	330292	-4086	0.21988	0.0880688	0.332247	0.332368	0.00012109	0.143719	0.0836401
			CD5R1	Q15078	0.00031261	0.00032648	1.387e-05	0.0432161	0.317764	59066	59638	572	0.133803	0.327095	0.310567	0.31051	-5.766e-05	0.389558	0.215146
			CD6	P30203	6.179e-05	6.28e-05	1.01e-06	0.367839	0.493142	7034	7008	-26	0.48137	0.436228	0.283366	0.283129	-0.00023699	0.359799	0.41919
			CD63	P08962	0.00077722	0.00078912	1.19e-05	0.173347	0.187729	186658	185840	-818	0.271815	0.150298	0.28411	0.283829	-0.00028007	0.390342	0.412916
			CD7	P09564	6.956e-05	7.086e-05	1.3e-06	0.293173	0.496213	10018	9970	-48	0.144433	0.474439	0.285326	0.285075	-0.00025072	0.385312	0.404731
			CD70	P32970	0	0	0	1	0.192146	0	0	0	1	0.192946	0.217024	0.216846	-0.00017746	0.356713	0.250246
			CD72	P21854	3.89e-06	3.95e-06	6e-08	0.355131	0.281204	1388	1394	6	0.2334	0.305013	0.30661	0.306664	5.426e-05	0.21665	0.246671
			CD79A	P11912	0.0007418	0.00075499	1.319e-05	0.117588	0.196073	115602	115284	-318	0.237664	0.224129	0.312641	0.31271	6.911e-05	0.217653	0.194031
			CD79B	P40259	2.28e-05	2.312e-05	3.2e-07	0.38191	0.4022	7002	6996	-6	0.382294	0.435941	0.308989	0.309004	1.564e-05	0.277834	0.227562
			CD80	P33681	1.3e-07	1e-07	-3e-08	0.0200602	0.194164	16	10	-6	0.0241449	0.195592	0.245553	0.245471	-8.171e-05	0.487412	0.343214
			CD81	P60033	0.00120953	0.00122194	1.241e-05	0.487437	0.129108	202586	200098	-2488	0.241206	0.140671	0.317162	0.317001	-0.00016118	0.46875	0.164166
CD82			CD82	P27701	0.00418422	0.00423798	5.376e-05	0.110664	0.0369726	937324	929134	-8190	0.41483	0.0314784	0.313603	0.313508	-9.543e-05	0.461384	0.188271
			CD86	P42081	1.3e-07	1e-07	-3e-08	0.0200602	0.194164	16	10	-6	0.0240964	0.195592	0.245553	0.245471	-8.171e-05	0.488465	0.343214
			CD8A	P01732	0.00287206	0.00290941	3.735e-05	0.162814	0.0542971	494022	488740	-5282	0.354481	0.0613193	0.304857	0.304575	-0.00028177	0.356713	0.263057
			CD8B	P10966	0	0	0	1	0.192146	0	0	0	1	0.192946	0.237118	0.237036	-8.161e-05	0.496482	0.30142
			CD9	P21926	0.00075816	0.00076662	8.46e-06	0.48497	0.192952	144544	143268	-1276	0.321966	0.191498	0.307535	0.307294	-0.00024129	0.429719	0.241149
			CD97	P48960	6.61e-06	6.7e-06	9e-08	0.507028	0.310553	1626	1622	-4	0.493467	0.313402	0.290444	0.29044	-4.63e-06	0.323647	0.37006
			CD99	P14209	4.641e-05	4.781e-05	1.4e-06	0.148335	0.464432	14642	14998	356	0.081571	0.489105	0.285068	0.285005	-6.332e-05	0.460922	0.405557
CDC2			CDC2	P06493	0.00864986	0.00886397	0.00021411	0.0862588	0.015559	1566248	1569296	3048	0.105316	0.0172171	0.363398	0.363425	2.718e-05	0.286432	0.0185766
			CDC23	Q9UJX2	2.086e-05	2.119e-05	3.3e-07	0.440321	0.393994	3832	3832	0	0.330661	0.383141	0.272835	0.272893	5.84e-05	0.197197	0.496516
CDC42			CDC42	P60953	0.00440081	0.00447611	7.53e-05	0.167503	0.0334807	814344	812400	-1944	0.191339	0.0368867	0.357585	0.357536	-4.904e-05	0.37249	0.0253429
			CDC6	Q99741	6.433e-05	6.695e-05	2.62e-06	0.0774648	0.498873	12726	12954	228	0.0916415	0.498178	0.293371	0.293361	-9.98e-06	0.310171	0.348622
			CDC7	O00311	3.033e-05	3.082e-05	4.9e-07	0.277555	0.422777	4846	4864	18	0.178248	0.40162	0.282442	0.282409	-3.32e-05	0.380522	0.426046
			CDCP1	Q9H5V8	9.792e-05	0.00010039	2.47e-06	0.259073	0.45795	23314	23404	90	0.297487	0.44052	0.313546	0.313565	1.844e-05	0.276104	0.187747
			CDD	P32320	0	0	0	1	0.192146	0	0	0	1	0.192946	0.248174	0.247146	-0.00102778	0.219316	0.351676
			CDIPT	O14735	2.3e-07	2.6e-07	3e-08	0.0531062	0.199865	198	200	2	0.254254	0.222848	0.273481	0.273283	-0.00019761	0.384925	0.492186
CDK2			CDK2	P24941	0.00592917	0.00596741	3.824e-05	0.364552	0.0264205	1030702	1014018	-16684	0.129259	0.0291991	0.349048	0.34831	-0.00073799	0.29029	0.0379751
			CDK3	Q00526	0.00032933	0.00033502	5.69e-06	0.138554	0.313533	50076	49666	-410	0.463783	0.350612	0.29285	0.292861	1.15e-05	0.279116	0.351677
			CDK4	P11802	0.00186094	0.00190896	4.802e-05	0.115346	0.083801	353222	353978	756	0.155466	0.0820452	0.337752	0.337782	2.992e-05	0.238431	0.0646698
			CDK5	Q00535	0.0018015	0.00185775	5.625e-05	0.0683417	0.0855329	353640	357600	3960	0.0490982	0.0814595	0.34512	0.345201	8.156e-05	0.219414	0.0445016
			CDK6	Q00534	0.00024792	0.00025459	6.67e-06	0.164493	0.346567	62768	62942	174	0.210632	0.318566	0.317948	0.317938	-9.95e-06	0.35146	0.158521
			CDK7	P50613	0.00041039	0.00042408	1.369e-05	0.0877016	0.289387	87142	87680	538	0.136273	0.277334	0.32027	0.320246	-2.427e-05	0.351703	0.146165
			CDK8	P49336	0.0002734	0.00027126	-2.14e-06	0.0600601	0.33929	45192	43364	-1828	0.0606061	0.368222	0.29238	0.292017	-0.00036376	0.311806	0.35751
			CDK9	P50750	0.00243219	0.00240377	-2.842e-05	0.0740741	0.0648493	378518	349688	-28830	0.0363269	0.0832603	0.328405	0.324564	-0.00384101	0.211694	0.120224
			CDKN3	Q16667	5.43e-06	5.51e-06	8e-08	0.465396	0.300432	2038	2032	-6	0.531786	0.32958	0.282051	0.281877	-0.00017428	0.431727	0.430243
			CDN1A	P38936	0.00170052	0.00174887	4.835e-05	0.118593	0.0909685	334964	336600	1636	0.12012	0.0864948	0.339074	0.339046	-2.778e-05	0.351406	0.0596455
			CDN1B	P46527	0.00138965	0.00142596	3.631e-05	0.154774	0.111176	306000	307766	1766	0.153614	0.0947072	0.348521	0.348486	-3.504e-05	0.375	0.037731
			CDN1C	P49918	5.877e-05	6.153e-05	2.76e-06	0.078392	0.491111	12320	12568	248	0.0971944	0.494865	0.288919	0.288904	-1.473e-05	0.356206	0.379735
			CDN2B	P42772	2.483e-05	2.53e-05	4.7e-07	0.313568	0.408496	2956	2954	-2	0.425852	0.359408	0.266027	0.266059	3.172e-05	0.24498	0.45275
			CDN2C	P42773	2.087e-05	2.238e-05	1.51e-06	0.0341365	0.399032	5564	5978	414	0.0190763	0.418596	0.289015	0.288831	-0.00018385	0.421421	0.380316
			CDN2D	P55273	2.5e-07	2.6e-07	1e-08	0.10743	0.199865	146	146	0	0.723232	0.215849	0.267237	0.267298	6.089e-05	0.205645	0.46286
			CEAM1	P13688	0.00020515	0.00020929	4.14e-06	0.133938	0.370647	38580	38536	-44	0.211635	0.382407	0.323047	0.323011	-3.629e-05	0.394153	0.12887
			CEBPA	P49715	0.00043822	0.00046637	2.815e-05	0.041289	0.280596	117026	121608	4582	0.0552209	0.216162	0.326517	0.326225	-0.00029215	0.384306	0.110896
			CEBPB	P17676	0.00331464	0.00275017	-0.00056447	0.0150602	0.0590634	719070	597278	-121792	0.0170512	0.0496968	0.346085	0.343239	-0.00284577	0.217304	0.0485588
			CEBPD	P49716	2.449e-05	1.649e-05	-8e-06	0.011022	0.367463	9580	5892	-3688	0.064257	0.416632	0.298141	0.288516	-0.00962511	0.209256	0.382825
			CEBPZ	Q03701	0	0	0	1	0.192146	0	0	0	1	0.192946	0.279661	0.279587	-7.366e-05	0.456281	0.449505
			CEGT	Q16739	0	0	0	1	0.192146	0	0	0	1	0.192946	0.216793	0.216751	-4.221e-05	0.45674	0.249862
			CELR2	Q9HCU4	0.00017367	0.00017634	2.67e-06	0.165996	0.393329	24236	24036	-200	0.483384	0.437954	0.301016	0.301085	6.825e-05	0.187311	0.288112
			CELR3	Q9NYQ7	4.796e-05	4.921e-05	1.25e-06	0.0824121	0.468341	9256	9222	-34	0.354774	0.464594	0.310846	0.310902	5.639e-05	0.207415	0.211262
			CENA1	O75689	0.00017265	0.00017533	2.68e-06	0.295888	0.394287	34084	33888	-196	0.47047	0.398317	0.308439	0.308478	3.955e-05	0.252008	0.232939
			CEND2	Q96P48	3.45e-06	3.5e-06	5e-08	0.611055	0.2721	274	274	0	0.766767	0.23082	0.243039	0.242993	-4.522e-05	0.437751	0.330987
			CENG1	Q99490	0	0	0	1	0.192146	0	0	0	1	0.192946	0.284436	0.284416	-2.025e-05	0.364552	0.409394
			CENPF	P49454	9.559e-05	0.00010489	9.3e-06	0.0280843	0.454124	11590	12862	1272	0.0540541	0.497337	0.281296	0.281301	5.42e-06	0.286286	0.435109
			CENPJ	Q9HC77	6.472e-05	6.778e-05	3.06e-06	0.0879121	0.499549	17750	18132	382	0.113911	0.472115	0.311797	0.31186	6.312e-05	0.2	0.203129
			CENPR	Q13352	0.0008298	0.00066955	-0.00016025	0.0140562	0.216535	140514	107060	-33454	0.0100604	0.240176	0.315029	0.307926	-0.00710236	0.21005	0.236878
			CEP57	Q86XR8	0	0	0	1	0.192146	0	0	0	1	0.192946	0.233443	0.233182	-0.00026134	0.292169	0.285971
			CEP72	Q9P209	4.024e-05	3.862e-05	-1.62e-06	0.073	0.4444	3712	3628	-84	0.151454	0.37611	0.26396	0.263694	-0.00026561	0.336673	0.439891
			CF062	Q9GZU0	0	0	0	1	0.192146	0	0	0	1	0.192946	0.216481	0.216328	-0.00015299	0.358794	0.248856
			CFAH	P08603	0.00014922	0.00015524	6.02e-06	0.0856855	0.409052	14784	14650	-134	0.242972	0.491081	0.273762	0.273631	-0.0001309	0.42986	0.488683
			CFLAR	O15519	0.00034557	0.00032712	-1.845e-05	0.0661986	0.317505	87806	78574	-9232	0.0231388	0.29359	0.320982	0.318792	-0.00218968	0.226586	0.153506
			CH10	P61604	0.00079428	0.00081851	2.423e-05	0.0571715	0.183231	169746	170402	656	0.125376	0.165527	0.323228	0.323162	-6.547e-05	0.441767	0.128101
CH60		CH60	CH60	P10809	0.00574496	0.00594059	0.00019563	0.0382679	0.0264851	1342106	1349138	7032	0.0562249	0.0226586	0.380393	0.3805	0.00010665	0.194361	0.00502979
			CHD1	O14646	9.88e-06	1.026e-05	3.8e-07	0.150754	0.333825	3766	3848	82	0.123618	0.383671	0.291005	0.290832	-0.00017301	0.434739	0.366922
			CHFR	Q96EP1	2.126e-05	2.146e-05	2e-07	0.364279	0.395296	3822	3736	-86	0.128773	0.379446	0.274651	0.27446	-0.00019147	0.38593	0.482664
			CHK1	O14757	0.00016435	0.00014973	-1.462e-05	0.026026	0.413895	53574	45178	-8396	0.0180542	0.362027	0.334266	0.330739	-0.00352694	0.219439	0.0902707
			CHRD	Q9H2X0	5.328e-05	5.455e-05	1.27e-06	0.209256	0.47903	11440	11566	126	0.192153	0.487277	0.308466	0.308506	3.974e-05	0.237186	0.232667
			CHSP1	Q9Y2V2	3.17e-06	3.24e-06	7e-08	0.294472	0.26734	1066	1068	2	0.496988	0.287567	0.280612	0.280705	9.238e-05	0.120724	0.440006
			CIB1	Q99828	0.00037794	0.00038239	4.45e-06	0.397192	0.301161	57800	57262	-538	0.363454	0.333395	0.297706	0.297185	-0.0005207	0.286432	0.316616
			CING	Q9P2M7	9.24e-06	9.49e-06	2.5e-07	0.108081	0.329755	2746	2754	8	0.29708	0.354461	0.297017	0.297134	0.00011701	0.115694	0.316922
			CISH	Q9NSE2	0.00019351	0.00019629	2.78e-06	0.467807	0.379412	45166	45074	-92	0.434303	0.362371	0.316409	0.316128	-0.00028161	0.361446	0.169445
			CJ018	Q5VWN6	0	0	0	1	0.192146	0	0	0	1	0.192946	0.223563	0.223521	-4.18e-05	0.400802	0.259241
			CK5P1	Q96SZ6	0	0	0	1	0.192146	0	0	0	1	0.192946	0.257678	0.257693	1.431e-05	0.267068	0.411538
			CK5P3	Q96JB5	0.00119128	0.00110292	-8.836e-05	0.0350701	0.144366	175198	148482	-26716	0.011011	0.184438	0.309596	0.302966	-0.00662985	0.214859	0.273853
			CKAP2	Q8WWK9	2.137e-05	2.193e-05	5.6e-07	0.116583	0.397677	3688	3760	72	0.111222	0.380116	0.279593	0.27961	1.675e-05	0.293173	0.449336
			CKAP4	Q07065	2.173e-05	2.204e-05	3.1e-07	0.476382	0.397971	9492	9504	12	0.355065	0.468472	0.307372	0.307239	-0.00013247	0.478916	0.241497
			CKLF3	Q96MX0	0	0	0	1	0.192146	0	0	0	1	0.192946	0.291299	0.291127	-0.00017141	0.421421	0.36384
			CKS1	P61024	3.005e-05	3.163e-05	1.58e-06	0.07	0.425044	7568	7910	342	0.0291165	0.448403	0.295396	0.295223	-0.00017385	0.41608	0.329523
			CL3L1	P16619	1.159e-05	1.291e-05	1.32e-06	0.0270812	0.348831	6332	6422	90	0.10999	0.426916	0.249066	0.248771	-0.00029423	0.299197	0.36317
			CLC11	Q9Y240	0	0	0	1	0.192146	0	0	0	1	0.192946	0.210268	0.209968	-0.00029994	0.291457	0.235127
			CLC4A	Q9UMR7	0	0	0	1	0.192146	0	0	0	1	0.192946	0.268542	0.268424	-0.00011827	0.439759	0.470267
			CLC4C	Q8WTT0	0	0	0	1	0.192146	0	0	0	1	0.192946	0.236084	0.235931	-0.00015249	0.347782	0.296488
			CLC4M	Q9H2X3	0.00015219	0.00015501	2.82e-06	0.157895	0.409283	25638	25230	-408	0.22837	0.432093	0.271509	0.27113	-0.0003788	0.302513	0.490701
			CLC5A	Q9NY25	0	0	0	1	0.192146	0	0	0	1	0.192946	0.214153	0.214135	-1.865e-05	0.39839	0.243431
			CLCA	P09496	7.335e-05	7.546e-05	2.11e-06	0.182915	0.490201	23620	23796	176	0.22668	0.438774	0.316467	0.316099	-0.00036844	0.298897	0.169657
			CLCF1	Q9UBD9	0	0	0	1	0.192146	0	0	0	1	0.192946	0.242172	0.242087	-8.472e-05	0.438755	0.328024
			CLCN3	P51790	0	0	0	1	0.192146	0	0	0	1	0.192946	0.263118	0.262949	-0.00016911	0.410282	0.436538
			CLD1	O95832	0.00015589	0.00015785	1.96e-06	0.306225	0.406572	18074	18554	480	0.0672691	0.469212	0.261588	0.261213	-0.00037568	0.306306	0.427634
			CLD11	O75508	0	0	0	1	0.192146	0	0	0	1	0.192946	0.253921	0.253854	-6.703e-05	0.438191	0.390345
			CLD3	O15551	0.00021019	0.0002019	-8.29e-06	0.0191147	0.374852	28076	27062	-1014	0.0492958	0.424247	0.270682	0.269306	-0.00137598	0.223116	0.477339
			CLD4	O14493	0	0	0	1	0.192146	0	0	0	1	0.192946	0.246339	0.246315	-2.411e-05	0.387487	0.346804
			CLD5	O00501	1.34e-06	1.38e-06	4e-08	0.160931	0.23424	156	156	0	0.708417	0.217264	0.229303	0.228917	-0.00038589	0.280561	0.272892
			CLD7	O95471	0	0	0	1	0.192146	0	0	0	1	0.192946	0.204945	0.204844	-0.00010033	0.425403	0.228638
CLH1		CLH1	CLH1	Q00610	0.00379438	0.00354618	-0.0002482	0.0170341	0.0446454	844174	728480	-115694	0.00703518	0.0410808	0.348241	0.344614	-0.00362767	0.211268	0.0457581
			CLIC5	Q9NZA1	6.4e-06	6.45e-06	5e-08	0.187311	0.30875	1766	1752	-14	0.255767	0.318215	0.292652	0.292538	-0.00011421	0.479438	0.354213
			CLIC6	Q96NY7	3.88e-06	3.93e-06	5e-08	0.51002	0.280846	392	392	0	0.665331	0.24153	0.243465	0.243492	2.636e-05	0.242485	0.33387
			CLN5	O75503	0	0	0	1	0.192146	0	0	0	1	0.192946	0.252496	0.252402	-9.426e-05	0.449144	0.383576
			CLOCK	O15516	0	0	0	1	0.192146	0	0	0	1	0.192946	0.272749	0.272396	-0.00035241	0.316213	0.499762
			CMA1	P23946	0.00015487	0.00010147	-5.34e-05	0.0130785	0.456743	15758	10924	-4834	0.00301205	0.480977	0.252772	0.248681	-0.00409065	0.217742	0.362323
			CMC2	Q9UJS0	0.00019564	0.00020101	5.37e-06	0.122736	0.375538	41092	40956	-136	0.438191	0.374841	0.3142	0.314137	-6.314e-05	0.408635	0.183495
			CN37	P09543	3.21e-06	3.32e-06	1.1e-07	0.153226	0.268951	932	926	-6	0.34739	0.282046	0.287218	0.287001	-0.00021742	0.390342	0.391605
			CNBP1	Q9NSA3	0.00023703	0.00024125	4.22e-06	0.0663317	0.352795	31580	30956	-624	0.170512	0.40898	0.291642	0.291473	-0.00016951	0.451158	0.36124
			CND3	Q9BPX3	3.481e-05	3.551e-05	7e-07	0.282849	0.436365	3892	3914	22	0.262575	0.385984	0.27007	0.270088	1.773e-05	0.269889	0.482881
			CNKR1	Q969H4	0.00018324	0.00018679	3.55e-06	0.275377	0.386483	32134	32176	42	0.225677	0.403884	0.300755	0.300874	0.00011899	0.109109	0.289834
			CNKR3	Q6P9H4	0	0	0	1	0.192146	0	0	0	1	0.192946	0.212316	0.211412	-0.0009041	0.234704	0.237825
			CNN3	Q15417	3.517e-05	3.643e-05	1.26e-06	0.054326	0.438883	3512	3612	100	0.0251004	0.375816	0.278828	0.27884	1.156e-05	0.295661	0.453966
			CNOT6	Q9ULM6	0	0	0	1	0.192146	0	0	0	1	0.192946	0.212446	0.212417	-2.966e-05	0.406814	0.24067
			CNR1	P21554	0.00173035	0.00174246	1.211e-05	0.284137	0.0915017	240194	236366	-3828	0.254016	0.119069	0.284063	0.283829	-0.00023349	0.34879	0.412916
			CNR2	P34972	0	0	0	1	0.192146	0	0	0	1	0.192946	0.226426	0.22618	-0.00024667	0.312249	0.266078
			CNTF	P26441	0.0006878	0.0006901	2.3e-06	0.0960961	0.21138	103446	101830	-1616	0.182915	0.249942	0.293395	0.292886	-0.00050911	0.273273	0.351513
			CNTFR	P26992	0.00072977	0.00073669	6.92e-06	0.179359	0.200368	118908	117460	-1448	0.340681	0.221175	0.319532	0.319384	-0.00014767	0.439	0.150551
			CNTN1	Q12860	0.00014995	0.00015462	4.67e-06	0.104	0.409656	18312	18492	180	0.1334	0.469538	0.292257	0.291645	-0.00061161	0.264529	0.359951
			CNTN2	Q02246	0.00041847	0.00041465	-3.82e-06	0.0663317	0.291408	57948	55708	-2240	0.0421264	0.336502	0.270281	0.269813	-0.00046816	0.28012	0.480883
			CNTP1	P78357	7.762e-05	7.964e-05	2.02e-06	0.146734	0.483562	21674	21890	216	0.128385	0.447826	0.322506	0.322647	0.00014159	0.12173	0.130658
			CNTP2	Q9UHC6	3.59e-06	3.66e-06	7e-08	0.239678	0.274816	300	304	4	0.147	0.234184	0.222187	0.222036	-0.00015073	0.395372	0.256672
			CO1A1	P02452	0.00069933	0.00070431	4.98e-06	0.292462	0.208831	144146	142720	-1426	0.305221	0.192151	0.310512	0.309978	-0.0005333	0.304829	0.219246
			CO1A2	P08123	0.00053074	0.00053654	5.8e-06	0.207415	0.263962	137246	134760	-2486	0.138138	0.200039	0.297783	0.297571	-0.00021206	0.42986	0.314013
			CO2	P06681	4.39e-06	4.46e-06	7e-08	0.447	0.287695	812	806	-6	0.38477	0.27333	0.2389	0.238845	-5.428e-05	0.455823	0.311012
			CO2A1	P02458	0.00066584	0.00060388	-6.196e-05	0.0422111	0.237034	105396	96524	-8872	0.0401204	0.258557	0.28258	0.281716	-0.00086483	0.264113	0.431342
			CO3	P01024	0.00268518	0.0027258	4.062e-05	0.193	0.0592553	318430	315922	-2508	0.452165	0.0923445	0.303282	0.30318	-0.0001025	0.497482	0.272675
			CO3A1	P02461	5.644e-05	5.57e-05	-7.4e-07	0.130303	0.48112	9808	9648	-160	0.262575	0.4707	0.270978	0.270512	-0.00046592	0.301205	0.485848
			CO4A	P0C0L4	9.836e-05	9.975e-05	1.39e-06	0.272272	0.458609	9712	9680	-32	0.274372	0.471108	0.250434	0.250418	-1.532e-05	0.327309	0.373413
			CO4A1	P02462	0.00144737	0.00145511	7.74e-06	0.22837	0.108419	307078	302948	-4130	0.248736	0.0961444	0.30086	0.300506	-0.00035323	0.336336	0.292643
			CO4A2	P08572	0.00018196	0.00018139	-5.7e-07	0.105316	0.389451	53154	52418	-736	0.241935	0.343165	0.281845	0.2816	-0.00024454	0.376138	0.4322
			CO4A4	P53420	3.985e-05	3.693e-05	-2.92e-06	0.0310621	0.440108	11046	10366	-680	0.0160481	0.477709	0.263719	0.263331	-0.00038766	0.306921	0.438187
			CO4A5	P29400	9.592e-05	9.394e-05	-1.98e-06	0.0481444	0.465283	32618	31826	-792	0.114573	0.404904	0.281501	0.281186	-0.00031516	0.344378	0.436295
			CO4A6	Q14031	9.592e-05	9.394e-05	-1.98e-06	0.0483384	0.465283	32618	31826	-792	0.114228	0.404904	0.281501	0.281186	-0.00031516	0.345035	0.436295
			CO4B	P0C0L5	0.00020663	0.0002083	1.67e-06	0.465187	0.371195	27552	26842	-710	0.0673367	0.424872	0.274651	0.274657	5.64e-06	0.293347	0.481567
			CO5	P01031	0.000366	0.00037114	5.14e-06	0.148893	0.303839	55004	54870	-134	0.146586	0.337907	0.254929	0.254925	-4.17e-06	0.333668	0.39523
			CO5A1	P20908	0.00020788	0.00020898	1.1e-06	0.234469	0.37082	61586	59972	-1614	0.0853414	0.326333	0.283111	0.282687	-0.00042412	0.313	0.423345
			CO5A2	P05997	7.98e-06	8.15e-06	1.7e-07	0.19196	0.31976	1568	1576	8	0.227455	0.311267	0.280272	0.280248	-2.426e-05	0.355422	0.443744
			CO5A3	P25940	1.2e-07	1.2e-07	0	0.0504032	0.194245	30	30	0	0.939	0.197325	0.2308	0.230635	-0.00016475	0.397397	0.277855
			CO6	P13671	0.00043767	0.00044401	6.34e-06	0.244221	0.285539	77610	77390	-220	0.23671	0.295644	0.312528	0.312596	6.83e-05	0.202811	0.195083
			CO7	P10643	1.62e-05	1.64e-05	2e-07	0.700605	0.367462	1378	1364	-14	0.304915	0.303219	0.235762	0.235511	-0.00025094	0.348133	0.295353
			CO8A	P07357	0.00014001	0.00014241	2.4e-06	0.123123	0.418556	27896	27940	44	0.129162	0.420388	0.249928	0.249964	3.582e-05	0.2249	0.371604
			CO8B	P07358	5.96e-06	5.93e-06	-3e-08	0.125628	0.304092	360	358	-2	0.38755	0.239026	0.210728	0.210623	-0.00010504	0.386935	0.236634
			CO8G	P07360	9.99e-05	9.632e-05	-3.58e-06	0.0342052	0.462084	18556	17678	-878	0.0451807	0.475447	0.23966	0.239127	-0.00053229	0.252769	0.312426
			CO9	P02748	0.00013197	0.00013418	2.21e-06	0.108981	0.426321	26876	26876	0	0.147442	0.42477	0.250851	0.25093	7.885e-05	0.122613	0.375887
			CO9A3	Q14050	0	0	0	1	0.192146	0	0	0	1	0.192946	0.233223	0.232725	-0.00049859	0.261261	0.284357
			COBA1	P12107	0	0	0	1	0.192146	0	0	0	1	0.192946	0.229897	0.229742	-0.00015414	0.358434	0.275353
			COBA2	P13942	3.68e-06	3.71e-06	3e-08	0.335347	0.276151	638	616	-22	0.0722892	0.260309	0.266579	0.266059	-0.00052088	0.285714	0.45275
			COF1	P23528	0.00052165	0.00053049	8.84e-06	0.254016	0.26516	110886	110568	-318	0.378894	0.232753	0.334783	0.334695	-8.794e-05	0.437876	0.0755252
			COF2	Q9Y281	1.933e-05	1.962e-05	2.9e-07	0.37011	0.386435	10114	10074	-40	0.227593	0.475591	0.316757	0.316535	-0.00022171	0.392749	0.16692
			COHA1	Q9UMD9	3.699e-05	3.745e-05	4.6e-07	0.363454	0.441237	8054	7906	-148	0.136683	0.448363	0.287028	0.286666	-0.00036172	0.344032	0.393254
			COIA1	P39060	4.102e-05	4.351e-05	2.49e-06	0.0733668	0.457121	6248	6330	82	0.215863	0.424829	0.273287	0.273001	-0.00028527	0.328615	0.4954
			COLI	P01189	0.0008472	0.00085219	4.99e-06	0.234406	0.178681	174480	175568	1088	0.0440882	0.159919	0.216969	0.216247	-0.00072254	0.236948	0.248705
			COMD9	Q9P000	0	0	0	1	0.192146	0	0	0	1	0.192946	0.266416	0	-0.266416	0.00100402	0.000850571
			COMP	P49747	0	0	0	1	0.192146	0	0	0	1	0.192946	0.257047	0.256866	-0.00018181	0.399799	0.406617
			COP	Q5EG05	2.24e-06	2.29e-06	5e-08	0.321608	0.252855	672	664	-8	0.23565	0.263082	0.26505	0.26479	-0.0002605	0.342052	0.446185
			COPA	P53621	0.00094253	0.00095782	1.529e-05	0.0653924	0.161768	228732	222020	-6712	0.0794769	0.125092	0.317657	0.317616	-4.119e-05	0.348044	0.160351
			COPD	P48444	0	0	0	1	0.192146	0	0	0	1	0.192946	0.241094	0.24107	-2.361e-05	0.348394	0.322704
			COR1A	P31146	4.855e-05	4.994e-05	1.39e-06	0.160606	0.470409	8008	8120	112	0.126761	0.450868	0.280431	0.280293	-0.0001374	0.438579	0.443435
			COR1C	Q9ULV4	5.86e-06	6.02e-06	1.6e-07	0.258812	0.304925	4648	4680	32	0.210843	0.398754	0.305609	0.305684	7.439e-05	0.179435	0.253961
			CORT	O00230	0.00146394	0.00147846	1.452e-05	0.140281	0.106083	215318	212052	-3266	0.214286	0.131238	0.237932	0.237937	5.49e-06	0.310553	0.306222
			COX41	P13073	2.755e-05	2.815e-05	6e-07	0.135815	0.415268	4152	3938	-214	0.0381526	0.386339	0.271021	0.269876	-0.00114461	0.234704	0.481372
			COX42	Q96KJ9	0	0	0	1	0.192146	0	0	0	1	0.192946	0.241632	0.241493	-0.00013878	0.389336	0.324799
			COX5A	P20674	5.423e-05	5.524e-05	1.01e-06	0.23565	0.480325	4252	4236	-16	0.503024	0.391716	0.267568	0.267485	-8.234e-05	0.495486	0.463699
			COX5B	P10606	1.231e-05	1.376e-05	1.45e-06	0.0382294	0.352562	3066	3160	94	0.0531062	0.365817	0.278761	0.278254	-0.00050722	0.273185	0.457219
			COX6C	P09669	0	0	0	1	0.192146	0	0	0	1	0.192946	0.226471	0.226076	-0.00039506	0.28987	0.265582
			CP1A2	P05177	0	0	0	1	0.192146	0	0	0	1	0.192946	0.196685	0.196652	-3.302e-05	0.456827	0.210193
			CP4F2	P78329	1.56e-06	1.59e-06	3e-08	0.596985	0.23913	2502	2502	0	0.542169	0.346678	0.318943	0.319058	0.00011491	0.143574	0.152068
			CPLX2	Q6PUV4	0	0	0	1	0.192146	0	0	0	1	0.192946	0.210102	0.210083	-1.886e-05	0.382146	0.235365
			CPMD8	Q8IZJ3	0	0	0	1	0.192146	0	0	0	1	0.192946	0.227467	0.22733	-0.00013691	0.389728	0.268867
			CPNE8	Q86YQ8	0	0	0	1	0.192146	0	0	0	1	0.192946	0.273222	0.273218	-3.92e-06	0.315895	0.493016
			CPNS1	P04632	0.00013087	0.00012961	-1.26e-06	0.125502	0.429916	16400	15930	-470	0.078392	0.484118	0.291642	0.291251	-0.00039149	0.327638	0.362731
			CPSF5	O43809	0.00027815	0.00027305	-5.1e-06	0.0896274	0.338635	58174	54126	-4048	0.0641926	0.339165	0.310317	0.30956	-0.00075682	0.265531	0.222622
			CR1	P17927	3.515e-05	3.575e-05	6e-07	0.323618	0.437065	4642	4602	-40	0.22022	0.39733	0.254293	0.254135	-0.00015859	0.381526	0.392128
			CR2	P20023	0.00040847	0.00043988	3.141e-05	0.0413306	0.28646	50484	52690	2206	0.0741483	0.342405	0.294768	0.294616	-0.00015207	0.468342	0.334727
			CR3L2	Q70SY1	0	0	0	1	0.192146	0	0	0	1	0.192946	0.206545	0.206553	7.99e-06	0.288732	0.230527
			CREB1	P16220	0.0015685	0.0016386	7.01e-05	0.0472837	0.0958855	293686	299878	6192	0.0461847	0.0971405	0.340809	0.340623	-0.00018505	0.44668	0.0550709
			CREM	Q03060	0.00048588	0.00050716	2.128e-05	0.0540541	0.269751	97320	100068	2748	0.00201005	0.253441	0.322416	0.322436	2.004e-05	0.277277	0.131948
			CRF	P06850	0.00030076	0.00030233	1.57e-06	0.151057	0.327393	111138	108776	-2362	0.174395	0.236331	0.218419	0.217821	-0.00059853	0.252261	0.252262
			CRFR1	P34998	0.00208108	0.00209018	9.1e-06	0.149448	0.0754689	503294	490656	-12638	0.114343	0.0609542	0.279345	0.278366	-0.00097901	0.24496	0.456468
			CRFR2	Q13324	4.403e-05	4.378e-05	-2.5e-07	0.0756048	0.457436	8590	7962	-628	0.0521565	0.448911	0.179879	0.179486	-0.00039268	0.257286	0.150875
CRK			CRK	P46108	0.00535271	0.00545432	0.00010161	0.165663	0.0284049	1087746	1087160	-586	0.15996	0.0277149	0.3669	0.366951	5.134e-05	0.251755	0.0144664
			CRKL	P46109	0.00066603	0.00067508	9.05e-06	0.300503	0.215106	170170	169606	-564	0.314	0.166344	0.342256	0.342249	-6.85e-06	0.341023	0.050687
			CRLF2	Q9HC73	2.44e-06	2.44e-06	0	0.168675	0.255067	754	774	20	0.0643216	0.270808	0.26734	0.267132	-0.00020816	0.370482	0.46188
			CROP	O95232	0	0	0	1	0.192146	0	0	0	1	0.192946	0.27614	0.276177	3.787e-05	0.237952	0.472748
			CRP	P02741	0.0002259	0.00023149	5.59e-06	0.194779	0.357637	25614	25878	264	0.183735	0.429689	0.276757	0.276733	-2.46e-05	0.381526	0.468087
			CRTC3	Q6UUV7	0	0	0	1	0.192146	0	0	0	1	0.192946	0.27614	0.276177	3.787e-05	0.238384	0.472748
			CS010	Q969H8	8.83e-06	9.21e-06	3.8e-07	0.122367	0.327525	6780	6914	134	0.0802407	0.434475	0.286009	0.286047	3.762e-05	0.263052	0.397151
			CSEN	Q9Y2W7	1.639e-05	1.676e-05	3.7e-07	0.282849	0.369556	4184	4196	12	0.340704	0.391114	0.294293	0.294364	7.164e-05	0.151606	0.337579
			CSF1	P09603	1.81e-05	7.66e-06	-1.044e-05	0.0140704	0.316483	3382	1470	-1912	0.00905433	0.308598	0.271509	0.265771	-0.00573819	0.209466	0.450739
			CSF1R	P07333	0.0001219	0.00014251	2.061e-05	0.0140704	0.418491	35270	40772	5502	0.00502513	0.375537	0.325719	0.325608	-0.00011133	0.494472	0.114727
			CSF2	P04141	3.426e-05	3.545e-05	1.19e-06	0.0983936	0.436047	5116	5174	58	0.130653	0.406789	0.267114	0.266677	-0.00043678	0.29708	0.458267
			CSF2R	P15509	8.645e-05	8.665e-05	2e-07	0.143	0.473929	22276	21602	-674	0.0570571	0.4492	0.306366	0.306146	-0.00022	0.423695	0.250706
			CSF3	P09919	0	0	0	1	0.192146	0	0	0	1	0.192946	0.250524	0.244096	-0.00642802	0.214644	0.336968
			CSF3R	Q99062	0.00133978	0.0012908	-4.898e-05	0.0331658	0.121591	232754	228892	-3862	0.173038	0.122137	0.324165	0.322889	-0.00127572	0.237186	0.129427
			CSH	P01243	3.947e-05	4.051e-05	1.04e-06	0.171515	0.449647	7506	7568	62	0.18392	0.444951	0.29174	0.29172	-2.07e-05	0.347124	0.359358
			CSK	P41240	0.001223	0.00124465	2.165e-05	0.297787	0.12638	309064	309772	708	0.223896	0.0942792	0.353391	0.353243	-0.00014811	0.460922	0.0305223
CSK21			CSK21	P68400	0.0114329	0.0117063	0.00027341	0.101406	0.00978273	2025372	2003876	-21496	0.437059	0.0112633	0.369876	0.369313	-0.00056287	0.314945	0.0118897
			CSK22	P19784	0.00203654	0.00205901	2.247e-05	0.461847	0.0772733	495704	480906	-14798	0.173212	0.061896	0.351313	0.350081	-0.00123162	0.257742	0.0357257
			CSN2	P61201	7.588e-05	8.223e-05	6.35e-06	0.0110664	0.479812	16772	17292	520	0.0391566	0.477934	0.30569	0.305521	-0.0001693	0.443888	0.255313
			CSPG2	P13611	0.00264361	0.00270647	6.286e-05	0.0631896	0.0594348	387904	384314	-3590	0.487437	0.0761302	0.276934	0.276755	-0.0001793	0.375758	0.467892
			CSRP1	P21291	0	0	0	1	0.192146	0	0	0	1	0.192946	0.255965	0.255968	2.74e-06	0.301603	0.400278
			CSRP2	Q16527	0	0	0	1	0.192146	0	0	0	1	0.192946	0.27838	0.278141	-0.00023892	0.371371	0.457925
			CT116	Q96HY6	0	0	0	1	0.192146	0	0	0	1	0.192946	0.236422	0.232536	-0.0038858	0.220322	0.283541
			CTBP1	Q13363	0.00149107	0.0015282	3.713e-05	0.123494	0.103164	273450	270828	-2622	0.332659	0.1055	0.315833	0.315867	3.41e-05	0.261261	0.171521
			CTBP2	P56545	0.00019801	0.00020196	3.95e-06	0.181727	0.374809	41178	40686	-492	0.246988	0.375854	0.296078	0.296086	8.09e-06	0.30202	0.323419
			CTDS1	Q9GZU7	0	0	0	1	0.192146	0	0	0	1	0.192946	0.248565	0.248556	-9.53e-06	0.324623	0.36124
			CTDS2	O14595	0	0	0	1	0.192146	0	0	0	1	0.192946	0.248565	0.248556	-9.53e-06	0.324297	0.36124
			CTF1	Q16619	0	0	0	1	0.192146	0	0	0	1	0.192946	0.252901	0.252698	-0.00020321	0.341709	0.385083
			CTGF	P29279	0.00031862	0.00031891	2.9e-07	0.18794	0.320939	56442	54656	-1786	0.0791583	0.338282	0.306556	0.305901	-0.00065461	0.255767	0.252295
			CTLA4	P16410	0.00053817	0.00054236	4.19e-06	0.314945	0.26261	131352	128794	-2558	0.204637	0.208864	0.31093	0.310818	-0.00011152	0.487928	0.211999
			CTNA1	P35221	0.00057977	0.00059012	1.035e-05	0.259519	0.243033	117870	117816	-54	0.330986	0.22066	0.325658	0.325546	-0.00011169	0.490964	0.115081
			CTNA2	P26232	0	0	0	1	0.192146	0	0	0	1	0.192946	0.233506	0.233514	7.95e-06	0.282981	0.287524
			CTNA3	Q9UI47	0	0	0	1	0.192146	0	0	0	1	0.192946	0.276162	0.275912	-0.00024981	0.364552	0.475122
			CTND1	O60716	0.0007356	0.00074971	1.411e-05	0.224674	0.197656	176080	176396	316	0.241725	0.158961	0.341918	0.341841	-7.699e-05	0.430862	0.0517645
			CTNL1	Q9UBT7	0	0	0	1	0.192146	0	0	0	1	0.192946	0.243654	0.243681	2.767e-05	0.241	0.334797
			CTR9	Q6PD62	0.00030519	0.00031207	6.88e-06	0.0704225	0.32391	43082	43440	358	0.0673367	0.367943	0.266068	0.265997	-7.082e-05	0.475327	0.452327
			CUL1	Q13616	0.00208495	0.00214681	6.186e-05	0.0645161	0.0730712	491644	467840	-23804	0.0481928	0.062788	0.344742	0.341672	-0.00307019	0.222334	0.0521985
			CUL2	Q13617	0.00128267	0.00131354	3.087e-05	0.174395	0.118922	203622	203292	-330	0.348744	0.137148	0.325872	0.325854	-1.788e-05	0.325628	0.113053
			CUL3	Q13618	0.00010758	0.00011596	8.38e-06	0.0280561	0.442095	30170	31824	1654	0.0160804	0.404908	0.315	0.314942	-5.81e-05	0.392965	0.178151
			CUL4B	Q13620	0.00012595	0.00014068	1.473e-05	0.017	0.419936	23488	24562	1074	0.0201005	0.435535	0.312331	0.312256	-7.48e-05	0.421	0.199355
			CX6B1	P14854	0	0	0	1	0.192146	0	0	0	1	0.192946	0.226471	0.226076	-0.00039506	0.291457	0.265582
			CXA1	P17302	0.00012367	0.00012576	2.09e-06	0.284137	0.433814	30250	30134	-116	0.492986	0.412434	0.317511	0.317616	0.00010435	0.164329	0.160351
			CXA3	Q9Y6H8	1.16e-06	1.13e-06	-3e-08	0.0672016	0.228501	334	326	-8	0.145436	0.235907	0.278358	0.278321	-3.663e-05	0.426279	0.456766
			CXAR	P78310	0	0	0	1	0.192146	0	0	0	1	0.192946	0.233916	0.233895	-2.107e-05	0.379276	0.288666
			CXCL2	P19875	1.612e-05	1.747e-05	1.35e-06	0.0390782	0.37234	2014	2046	32	0.120724	0.330135	0.266929	0.266801	-0.00012757	0.458207	0.459101
			CXCL3	P19876	0	0	0	1	0.192146	0	0	0	1	0.192946	0.23517	0.234869	-0.0003017	0.313883	0.292874
			CXCL5	P42830	2.73e-05	4.306e-05	1.576e-05	0.00100402	0.455923	6020	9192	3172	0.00802407	0.464235	0.2435	0.243251	-0.00024877	0.332999	0.332765
			CXCL6	P80162	1.247e-05	1.717e-05	4.7e-06	0.001	0.371207	2670	3640	970	0.00402414	0.376364	0.242885	0.242548	-0.00033709	0.309237	0.329031
			CXCL7	P02775	7.805e-05	8.3e-05	4.95e-06	0.0544355	0.479033	8282	8516	234	0.0693467	0.455871	0.26398	0.263917	-6.331e-05	0.430584	0.441267
			CXCL9	Q07325	5.9e-07	5.8e-07	-1e-08	0.103414	0.214649	174	158	-16	0.0461847	0.217366	0.211681	0.210881	-0.0007996	0.23565	0.237051
			CXCR1	P25024	0.00033702	0.00033629	-7.3e-07	0.118474	0.313205	61926	62258	332	0.129779	0.319771	0.272684	0.271837	-0.00084736	0.240964	0.496423
			CXCR2	P25025	0.0023729	0.00234808	-2.482e-05	0.106319	0.0659836	349612	339988	-9624	0.113911	0.0855256	0.307426	0.30691	-0.00051575	0.308543	0.244208
			CXCR3	P49682	0.00019281	0.00019476	1.95e-06	0.39799	0.380497	41102	40520	-582	0.272818	0.376441	0.23885	0.238201	-0.00064952	0.239437	0.307967
			CXCR4	P61073	0.00101643	0.00081073	-0.0002057	0.00501002	0.184693	229846	187758	-42088	0.00601805	0.148564	0.332949	0.332271	-0.00067753	0.272088	0.0842329
			CXCR5	P32302	0.00023408	0.00022339	-1.069e-05	0.0523139	0.361918	56030	52922	-3108	0.0535895	0.341798	0.27524	0.273696	-0.00154436	0.225225	0.488062
			CXCR7	P25106	0	0	0	1	0.192146	0	0	0	1	0.192946	0.294043	0.294037	-5.52e-06	0.285859	0.342271
			CXL10	P02778	1.172e-05	1.272e-05	1e-06	0.0462777	0.347796	2460	2584	124	0.0471888	0.350074	0.22404	0.223521	-0.00051882	0.261785	0.259241
			CXL11	O14625	5.9e-07	5.8e-07	-1e-08	0.10404	0.214649	174	158	-16	0.0471888	0.217366	0.211681	0.210881	-0.0007996	0.237186	0.237051
			CXL13	O43927	0.00012215	0.0001265	4.35e-06	0.0797175	0.433085	17690	17864	174	0.116116	0.474046	0.252294	0.252069	-0.00022474	0.317907	0.382421
			CXXC1	Q9P0U4	3.59e-06	3.66e-06	7e-08	0.231463	0.274816	648	644	-4	0.344724	0.261684	0.256591	0.255797	-0.00079397	0.238191	0.399292
			CY1	P08574	6.507e-05	6.674e-05	1.67e-06	0.0963855	0.498683	15776	16094	318	0.0986908	0.483545	0.243945	0.243837	-0.00010859	0.440201	0.335452
			CY24A	P13498	3.07e-06	2.7e-06	-3.7e-07	0.0340681	0.258821	708	566	-142	0.00702811	0.257618	0.26765	0.266326	-0.00132403	0.222	0.454744
			CY24B	P04839	2.466e-05	2.54e-05	7.4e-07	0.135406	0.408791	5086	5262	176	0.0421264	0.407789	0.283621	0.282618	-0.00100356	0.235	0.42401
			CYC	P99999	0.00337711	0.00340619	2.908e-05	0.307229	0.0465675	518154	512166	-5988	0.322613	0.0576016	0.318591	0.31835	-0.00024141	0.38477	0.156261
			CYFP1	Q7L576	0.00026087	0.00026762	6.75e-06	0.146146	0.340886	64984	65104	120	0.244221	0.314092	0.325658	0.325546	-0.00011169	0.491474	0.115081
			CYFP2	Q96F07	0.00019909	0.00020364	4.55e-06	0.175527	0.373582	49802	49626	-176	0.47495	0.350721	0.320626	0.320604	-2.194e-05	0.361531	0.144171
			CYLD	Q9NQC7	1.71e-06	1.79e-06	8e-08	0.12751	0.243012	1464	1494	30	0.131131	0.309309	0.290517	0.289877	-0.00064027	0.247236	0.374617
			CYR61	O00622	1.822e-05	1.883e-05	6.1e-07	0.172691	0.37993	4086	4114	28	0.274194	0.389382	0.282765	0.282502	-0.00026317	0.357789	0.425204
			CYTB	P04080	0.00019211	0.00019757	5.46e-06	0.182365	0.378531	30552	30584	32	0.337702	0.410551	0.286387	0.286261	-0.00012649	0.483903	0.395833
			CYTSA	Q69YQ0	2.72e-06	2.78e-06	6e-08	0.342742	0.260003	2022	2028	6	0.257056	0.329392	0.298141	0.298164	2.209e-05	0.253776	0.308318
			DAB2	P98082	0.00117995	0.00121664	3.669e-05	0.122367	0.129773	297476	300414	2938	0.120846	0.0969212	0.350851	0.351081	0.00023064	0.081571	0.0345815
			DAF	P08174	0.00023638	0.00024007	3.69e-06	0.205823	0.353198	31282	31142	-140	0.330979	0.408183	0.294818	0.294843	2.49e-05	0.257773	0.332417
			DAG1	Q14118	0.00153032	0.00154513	1.481e-05	0.41608	0.10183	261276	258840	-2436	0.328974	0.10912	0.329216	0.329252	3.581e-05	0.260563	0.0970475
			DAPK1	P53355	4.171e-05	4.25e-05	7.9e-07	0.366297	0.45466	14090	13996	-94	0.335341	0.494236	0.307808	0.307871	6.273e-05	0.198189	0.237164
			DAPK2	Q9UIK4	2.65e-06	2.71e-06	6e-08	0.378651	0.258941	730	736	6	0.288016	0.268603	0.265273	0.265136	-0.00013697	0.437876	0.447647
			DAPK3	O43293	6.064e-05	6.285e-05	2.21e-06	0.10521	0.493142	11282	11442	160	0.185111	0.486123	0.312303	0.312228	-7.497e-05	0.425276	0.199619
			DAPP1	Q9UN19	4.95e-06	5.34e-06	3.9e-07	0.0566229	0.29881	2796	3014	218	0.0300903	0.36157	0.311237	0.311099	-0.0001378	0.467871	0.209674
			DAXX	Q9UER7	0.00159577	0.0016376	4.183e-05	0.137688	0.0959273	288428	290632	2204	0.12024	0.100154	0.336212	0.336034	-0.00017756	0.471888	0.0702269
			DBNL	Q9UJU6	0.00020933	0.00021211	2.78e-06	0.147442	0.369131	48510	48140	-370	0.444556	0.353722	0.295069	0.295147	7.723e-05	0.16499	0.330074
			DCBD1	Q8N8Z6	0	0	0	1	0.192146	0	0	0	1	0.192946	0.238079	0.237822	-0.00025673	0.302209	0.305385
			DCC	P43146	0.00031822	0.00032299	4.77e-06	0.390171	0.319081	53404	53144	-260	0.461924	0.341242	0.318094	0.317968	-0.00012652	0.498498	0.15833
			DCE1	Q99259	0.00020223	0.00021166	9.43e-06	0.0512048	0.369419	58356	59432	1076	0.0871743	0.327632	0.322686	0.322587	-9.91e-05	0.497502	0.131043
			DCE2	Q05329	5.684e-05	5.717e-05	3.3e-07	0.329329	0.483856	6006	5828	-178	0.0852558	0.415471	0.280408	0.279338	-0.0010701	0.231463	0.451126
			DCR1C	Q96SD1	0	0	0	1	0.192146	0	0	0	1	0.192946	0.274238	0.274045	-0.00019364	0.418675	0.485169
			DCTD	P32321	0	0	0	1	0.192146	0	0	0	1	0.192946	0.233916	0.233895	-2.107e-05	0.378894	0.288666
			DDEF1	Q9ULH1	7.913e-05	8.16e-05	2.47e-06	0.148445	0.480947	27222	27506	284	0.152457	0.422305	0.333237	0.333269	3.162e-05	0.282412	0.0802277
			DDEF2	O43150	0.00013182	0.00013513	3.31e-06	0.212702	0.42527	43896	44052	156	0.242699	0.365846	0.332661	0.332689	2.767e-05	0.287864	0.0821187
			DDIT3	P35638	8.809e-05	9.435e-05	6.26e-06	0.0481928	0.464821	24246	25450	1204	0.0190572	0.431247	0.296053	0.295628	-0.00042436	0.309619	0.326789
			DDR1	Q08345	0.00074501	0.00075087	5.86e-06	0.458207	0.197373	133812	132228	-1584	0.297595	0.203605	0.298501	0.298241	-0.00025998	0.354188	0.307689
			DDR2	Q16832	0.00014626	0.00014987	3.61e-06	0.145161	0.413781	20032	20308	276	0.0904523	0.456633	0.299404	0.299252	-0.00015148	0.446231	0.299927
			DDX17	Q92841	0.00011546	0.00011848	3.02e-06	0.178357	0.439436	22580	22690	110	0.206413	0.443789	0.307508	0.307624	0.00011557	0.137688	0.238781
			DDX18	Q9NVP1	0	0	0	1	0.192146	0	0	0	1	0.192946	0.305636	0.305494	-0.00014249	0.5	0.255583
			DDX20	Q9UHI6	0.00038401	0.00039811	1.41e-05	0.0865191	0.296552	64112	64818	706	0.100402	0.314738	0.303814	0.303849	3.475e-05	0.243952	0.268847
			DDX21	Q9NR30	0.00012577	0.00010925	-1.652e-05	0.0320641	0.451271	44164	36796	-7368	0.0241692	0.387937	0.311881	0.306173	-0.00570791	0.210262	0.250537
			DDX3X	O00571	0.00121974	0.00117851	-4.123e-05	0.0732932	0.133621	387766	335512	-52254	0.00301205	0.0867814	0.359925	0.357722	-0.00220332	0.223	0.0251351
			DDX47	Q9H0S4	7.3e-07	7.5e-07	2e-08	0.184369	0.219586	470	470	0	0.598796	0.248282	0.305717	0.305575	-0.00014203	0.496982	0.254889
			DDX5	P17844	0.00244296	0.00260834	0.00016538	0.00902708	0.0608889	798438	819260	20822	0.0140704	0.0364513	0.377945	0.378117	0.00017207	0.142285	0.00572788
			DDX58	O95786	0	0	0	1	0.192146	0	0	0	1	0.192946	0.246409	0.24635	-5.892e-05	0.462851	0.347142
			DDX6	P26196	0.00015582	0.00016991	1.409e-05	0.039196	0.398398	29890	31270	1380	0.0261044	0.407568	0.308851	0.308949	9.787e-05	0.142427	0.228158
			DEAF1	O75398	0	0	0	1	0.192146	0	0	0	1	0.192946	0.219082	0.218971	-0.00011127	0.432596	0.253522
			DEF1	P59665	0.0005772	0.00058106	3.86e-06	0.238238	0.248498	69810	68576	-1234	0.180905	0.309311	0.187907	0.187749	-0.00015785	0.335005	0.178188
			DEF3	P59666	0	0	0	1	0.192146	0	0	0	1	0.192946	0.15819	0.158078	-0.00011184	0.336016	0.0851502
			DEF5	Q01523	0	0	0	1	0.192146	0	0	0	1	0.192946	0.234979	0.234949	-3.017e-05	0.390342	0.293279
			DEFI6	Q9H4E7	1.93e-06	1.96e-06	3e-08	0.626881	0.246852	552	548	-4	0.315	0.255521	0.277867	0.277827	-3.978e-05	0.398798	0.460194
			DEND3	A2RUS2	0	0	0	1	0.192146	0	0	0	1	0.192946	0.240208	0.24033	0.00012159	0.0521565	0.318987
			DERL1	Q9BUN8	0.00010295	0.00010469	1.74e-06	0.321573	0.454279	13748	13742	-6	0.378024	0.49559	0.282788	0.28271	-7.742e-05	0.470411	0.42312
			DESM	P17661	0.00060799	0.00061171	3.72e-06	0.250501	0.234366	95604	93802	-1802	0.175527	0.263939	0.283111	0.282548	-0.00056335	0.286861	0.424732
			DESP	P15924	0.00111827	0.00100561	-0.00011266	0.0311871	0.154271	194350	159610	-34740	0.00301507	0.173514	0.326733	0.323587	-0.00314519	0.218876	0.125649
			DET1	Q7L5Y6	0	0	0	1	0.192146	0	0	0	1	0.192946	0.243226	0.243131	-9.556e-05	0.448898	0.331963
			DFFA	O00273	0.00067379	0.00068003	6.24e-06	0.135815	0.2137	132070	129250	-2820	0.0882648	0.20831	0.306583	0.306746	0.00016337	0.0830831	0.245834
			DFFB	O76075	0	0	0	1	0.192146	0	0	0	1	0.192946	0.234661	0.234757	9.58e-05	0.0874372	0.292238
			DGCR8	Q8WYQ5	0	0	0	1	0.192146	0	0	0	1	0.192946	0.23541	0.235238	-0.00017218	0.333333	0.294478
			DGKA	P23743	1.084e-05	0	-1.084e-05	0.00804829	0.192146	2662	0	-2662	0.0140704	0.192946	0.290542	0.289999	-0.00054251	0.268342	0.373764
			DHC24	Q15392	0	0	0	1	0.192146	0	0	0	1	0.192946	0.278135	0.278052	-8.299e-05	0.447896	0.458507
			DHH	O43323	0.00015714	0.00015822	1.08e-06	0.318913	0.405897	59868	58746	-1122	0.211847	0.329215	0.225924	0.225927	2.9e-06	0.314889	0.264834
			DHSA	P31040	7.14e-06	7.48e-06	3.4e-07	0.133938	0.31577	6154	6380	226	0.0793173	0.42604	0.288894	0.28842	-0.00047481	0.273185	0.38352
			DHSB	P21912	1.173e-05	1.16e-05	-1.3e-07	0.0693467	0.34134	3044	2906	-138	0.0221328	0.357955	0.269147	0.268048	-0.00109946	0.233635	0.467192
			DHX15	O43143	0.00018812	0.0001932	5.08e-06	0.126633	0.38246	61296	61940	644	0.103414	0.320479	0.32119	0.321202	1.173e-05	0.305528	0.139738
			DHX58	Q96C10	0	0	0	1	0.192146	0	0	0	1	0.192946	0.246461	0.246509	4.729e-05	0.188318	0.348567
			DIAP1	O60610	6.42e-05	6.507e-05	8.7e-07	0.465327	0.496055	9004	8968	-36	0.501508	0.461777	0.281524	0.281531	6.95e-06	0.314516	0.432814
			DICER	Q9UPY3	0.00226171	0.00228452	2.281e-05	0.167503	0.0682225	549222	526884	-22338	0.0591775	0.0559191	0.318914	0.318881	-3.308e-05	0.323944	0.152981
			DIMT1	Q9UNQ2	7.825e-05	8.115e-05	2.9e-06	0.10574	0.481618	22070	22296	226	0.117234	0.445646	0.312444	0.31237	-7.41e-05	0.413306	0.197887
DLG1			DLG1	Q12959	0.00682361	0.0068768	5.319e-05	0.477867	0.0224207	1023834	1006396	-17438	0.0473313	0.029388	0.329906	0.329599	-0.00030697	0.35035	0.0959421
			DLG3	Q92796	0.00233126	0.00235236	2.11e-05	0.285141	0.0658471	383048	376122	-6926	0.162135	0.0779024	0.302673	0.302753	8.014e-05	0.177533	0.275505
			DLGP5	Q15398	3.84e-06	4.56e-06	7.2e-07	0.0100604	0.288348	478	480	2	0.227912	0.249595	0.26875	0.267714	-0.00103639	0.232394	0.465032
			DLK1	P80370	5.93e-06	5.87e-06	-6e-08	0.0662651	0.303353	536	518	-18	0.0693467	0.252768	0.228336	0.22694	-0.00139601	0.237134	0.267639
			DLL1	O00548	0.00080495	0.00081684	1.189e-05	0.0211268	0.183514	115314	114406	-908	0.308233	0.225946	0.269524	0.268069	-0.00145542	0.230692	0.467357
			DLL4	Q9NR61	3.5e-07	3.5e-07	0	0.0925553	0.202604	118	118	0	0.772636	0.210373	0.248316	0.245454	-0.002862	0.216298	0.343151
			DLRB1	Q9NP97	1.197e-05	1.251e-05	5.4e-07	0.118593	0.346804	1822	1844	22	0.20662	0.321945	0.272341	0.271837	-0.00050444	0.2751	0.496423
			DMD	P11532	9.26e-05	9.435e-05	1.75e-06	0.304523	0.464821	15074	15172	98	0.221665	0.487878	0.298887	0.29894	5.316e-05	0.21875	0.301911
			DMN	O15061	0	0	0	1	0.192146	0	0	0	1	0.192946	0.220658	0.220316	-0.00034227	0.290744	0.254532
			DMPK	Q09013	0.00011319	0.00012148	8.29e-06	0.0361083	0.437569	18484	20114	1630	0.04004	0.457882	0.289498	0.289463	-3.525e-05	0.394153	0.376651
			DMTF1	Q9Y222	5.3e-07	5.4e-07	1e-08	0.275932	0.211996	286	286	0	0.674723	0.233132	0.258563	0.258603	3.976e-05	0.231156	0.416466
			DMXL2	Q8TDJ6	0	0	0	1	0.192146	0	0	0	1	0.192946	0.192244	0.192151	-9.273e-05	0.397796	0.195374
			DNJB1	P25685	0.00040626	0.00040836	2.1e-06	0.275827	0.293692	58066	56122	-1944	0.0523139	0.335742	0.301908	0.301586	-0.00032225	0.332999	0.284048
			DNJB4	Q9UDY4	2.12e-06	2.2e-06	8e-08	0.0981964	0.251061	608	608	0	0.450151	0.260091	0.271021	0.270981	-3.978e-05	0.38191	0.489429
			DNJC1	Q96KC8	0	0	0	1	0.192146	0	0	0	1	0.192946	0.272835	0.271473	-0.00136214	0.234704	0.493669
			DNM1L	O00429	8.62e-06	8.91e-06	2.9e-07	0.144433	0.32519	1980	1980	0	0.445565	0.327427	0.288654	0.288492	-0.00016162	0.424273	0.38302
			DNM3A	Q9Y6K1	3.79e-05	4.008e-05	2.18e-06	0.041041	0.448258	9512	9838	326	0.0201005	0.47289	0.296585	0.296545	-3.959e-05	0.351759	0.319927
			DNM3B	Q9UBC3	7.669e-05	7.794e-05	1.25e-06	0.253521	0.486009	13370	13174	-196	0.176884	0.499474	0.287934	0.287817	-0.00011748	0.475855	0.386873
			DNMT1	P26358	0.00077911	0.00079445	1.534e-05	0.0933735	0.186919	119598	118286	-1312	0.258291	0.219968	0.314943	0.315115	0.00017216	0.0823293	0.176876
			DOCK1	Q14185	0.00060883	0.00061691	8.08e-06	0.126379	0.231886	94750	94496	-254	0.164329	0.262757	0.32526	0.3253	3.958e-05	0.243731	0.116353
			DOCK2	Q92608	2.898e-05	2.938e-05	4e-07	0.486432	0.418769	6466	6448	-18	0.44333	0.427502	0.288606	0.288492	-0.00011354	0.493454	0.38302
			DOCK4	Q8N1I0	0	0	0	1	0.192146	0	0	0	1	0.192946	0.26898	0.269053	7.342e-05	0.156156	0.475454
			DOCK7	Q96N67	3.032e-05	3.093e-05	6.1e-07	0.279397	0.423076	9622	9592	-30	0.513568	0.469895	0.311629	0.311606	-2.273e-05	0.339394	0.205663
			DOCK9	Q9BZ29	0	0	0	1	0.192146	0	0	0	1	0.192946	0.263418	0.263391	-2.648e-05	0.385155	0.438469
			DOK1	Q99704	0.00032715	0.00033845	1.13e-05	0.103103	0.312544	102556	103750	1194	0.281846	0.245807	0.332629	0.332625	-4.7e-06	0.321643	0.0823921
			DOK2	O60496	0.00025191	0.00025475	2.84e-06	0.336345	0.346489	43258	42792	-466	0.273917	0.370278	0.3125	0.312285	-0.00021548	0.397384	0.198993
			DOK3	Q7L591	3.51e-06	3.56e-06	5e-08	0.51004	0.272895	1856	1852	-4	0.461924	0.322399	0.308219	0.308285	6.564e-05	0.222782	0.234591
			DOPD	P30046	5.02e-06	5.17e-06	1.5e-07	0.224121	0.297136	5172	5208	36	0.225253	0.407153	0.28084	0.280179	-0.0006606	0.262312	0.44426
			DP13A	Q9UKG1	0.00080472	0.00081386	9.14e-06	0.356566	0.184036	148774	147382	-1392	0.333667	0.186106	0.317221	0.317089	-0.00013164	0.462702	0.16353
			DP13B	Q8NEU8	2.029e-05	2.072e-05	4.3e-07	0.135406	0.391456	4666	4652	-14	0.365657	0.398297	0.265233	0.265218	-1.464e-05	0.364919	0.448046
			DPOA2	Q14181	0.00021397	0.00021486	8.9e-07	0.231928	0.367344	27220	26144	-1076	0.0796371	0.428415	0.285585	0.285028	-0.00055661	0.302419	0.405257
			DPOD1	P28340	0.00069959	0.0007219	2.231e-05	0.0904523	0.20422	143278	144664	1386	0.118118	0.189956	0.332885	0.332979	9.362e-05	0.207243	0.0811275
			DPOD2	P49005	8.3e-06	8.72e-06	4.2e-07	0.0522613	0.324071	1716	1776	60	0.0570571	0.319214	0.282212	0.282131	-8.094e-05	0.485456	0.428393
			DPOD3	Q15054	0	0	0	1	0.192146	0	0	0	1	0.192946	0.269776	0.269496	-0.00028	0.317172	0.478768
			DPOE3	Q9NRF9	0.0005772	0.00058106	3.86e-06	0.236181	0.248498	91846	90158	-1688	0.232465	0.271965	0.214365	0.214415	4.949e-05	0.146881	0.244453
			DPOE4	Q9NR33	0	0	0	1	0.192146	0	0	0	1	0.192946	0.176534	0.176567	3.363e-05	0.143574	0.139804
			DPYL2	Q16555	4.9e-06	4.96e-06	6e-08	0.413828	0.294064	1126	1106	-20	0.110553	0.288859	0.292134	0.291645	-0.0004884	0.279116	0.359951
			DRD1	P21728	3.753e-05	3.803e-05	5e-07	0.457286	0.443055	5860	5854	-6	0.344032	0.415939	0.283668	0.283689	2.149e-05	0.28629	0.413959
			DRD2	P14416	0.00098474	0.00098972	4.98e-06	0.252008	0.157385	128608	126920	-1688	0.207831	0.210794	0.295145	0.294995	-0.00014994	0.439439	0.331209
			DRD3	P35462	0.00048833	0.00049481	6.48e-06	0.278837	0.272121	91884	90906	-978	0.273642	0.270483	0.311909	0.311917	7.37e-06	0.285858	0.20258
			DRD4	P21917	0.00021841	0.00022043	2.02e-06	0.348089	0.363339	46106	45158	-948	0.0763052	0.362082	0.298295	0.298319	2.315e-05	0.244734	0.307042
			DRD5	P21918	5.96e-06	5.97e-06	1e-08	0.202213	0.304474	1602	1556	-46	0.0986908	0.31067	0.254312	0.254247	-6.463e-05	0.486405	0.392697
			DREB	Q16643	3.579e-05	3.824e-05	2.45e-06	0.0361446	0.443489	19590	20158	568	0.0797175	0.457571	0.317162	0.317001	-0.00016118	0.452452	0.164166
			DSCAM	O60469	0	0	0	1	0.192146	0	0	0	1	0.192946	0.269335	0.269369	3.382e-05	0.235412	0.477873
			DSG2	Q14126	1.034e-05	1.062e-05	2.8e-07	0.0783133	0.335584	1578	1578	0	0.436181	0.311347	0.264726	0.264647	-7.902e-05	0.498495	0.445732
			DSRAD	P55265	7.7e-07	8.4e-07	7e-08	0.0362538	0.221312	160	164	4	0.117352	0.218054	0.267899	0.267029	-0.00086986	0.255276	0.461072
			DSS1	P60896	0	0	0	1	0.192146	0	0	0	1	0.192946	0.251634	0.251627	-7.41e-06	0.331325	0.379586
			DTX1	Q86Y01	9.275e-05	9.7e-05	4.25e-06	0.0712136	0.461169	17838	18562	724	0.0470942	0.469171	0.311097	0.310959	-0.00013861	0.482966	0.210825
			DUFFY	Q16570	8.845e-05	8.201e-05	-6.44e-06	0.0485339	0.480099	15184	15060	-124	0.338353	0.488673	0.241379	0.237478	-0.00390173	0.218656	0.303179
			DUS1	P28562	7.437e-05	7.934e-05	4.97e-06	0.0372984	0.483971	17866	18504	638	0.0594159	0.469473	0.303734	0.303661	-7.299e-05	0.401204	0.270093
			DUS10	Q9Y6W6	4.78e-06	4.86e-06	8e-08	0.370482	0.292509	2154	2138	-16	0.364185	0.333352	0.289691	0.289609	-8.275e-05	0.451	0.375962
			DUS14	O95147	0	0	0	1	0.192146	0	0	0	1	0.192946	0.240826	0.240699	-0.00012639	0.392354	0.320809
			DUS16	Q9BY84	1.827e-05	1.864e-05	3.7e-07	0.246988	0.378457	6234	6216	-18	0.490927	0.422848	0.294718	0.294616	-0.00010193	0.463855	0.334727
			DUS2	Q05923	0	0	0	1	0.192146	0	0	0	1	0.192946	0.287552	0.287552	3.4e-07	0.300101	0.388367
			DUS22	Q9NRW4	4.69e-06	4.8e-06	1.1e-07	0.237952	0.291596	1334	1336	2	0.342052	0.30199	0.29206	0.292017	-4.338e-05	0.365829	0.35751
			DUS3	P51452	0.00026859	0.00027402	5.43e-06	0.178357	0.338286	48052	48090	38	0.255533	0.353904	0.318123	0.318056	-6.758e-05	0.435045	0.157846
			DUS4	Q13115	2.071e-05	2.118e-05	4.7e-07	0.25227	0.393994	6358	6350	-8	0.477387	0.425324	0.298784	0.298759	-2.538e-05	0.345382	0.303104
			DUS5	Q16690	0	0	0	1	0.192146	0	0	0	1	0.192946	0.286364	0.28638	1.626e-05	0.255511	0.394893
			DUS6	Q16828	0	0	0	1	0.192146	0	0	0	1	0.192946	0.290859	0.290881	2.27e-05	0.260302	0.366451
			DUS7	Q16829	4.2e-06	4.28e-06	8e-08	0.287864	0.285724	1284	1276	-8	0.373494	0.297581	0.292998	0.292911	-8.724e-05	0.451807	0.351373
			DUS9	Q99956	0	0	0	1	0.192146	0	0	0	1	0.192946	0.290859	0.290881	2.27e-05	0.261523	0.366451
			DVL1	O14640	0.00054866	0.00056106	1.24e-05	0.155311	0.258794	95948	97000	1052	0.0583501	0.257764	0.321996	0.321893	-0.00010327	0.465863	0.135768
			DVL2	O14641	0.00055254	0.00056736	1.482e-05	0.181174	0.257289	140660	142126	1466	0.146734	0.192754	0.338049	0.338081	3.196e-05	0.233635	0.0632516
			DVL3	Q92997	0.00033694	0.00034132	4.38e-06	0.346425	0.311281	47306	46858	-448	0.327309	0.357831	0.305744	0.305792	4.818e-05	0.207623	0.253081
			DYL1	P63167	0.00309209	0.00314894	5.685e-05	0.184925	0.0499393	473366	469318	-4048	0.359799	0.0626451	0.341649	0.34157	-7.868e-05	0.408225	0.0524516
			DYN1	Q05193	0.00104961	0.0010658	1.619e-05	0.386386	0.148091	261102	260346	-756	0.408862	0.10845	0.351206	0.351081	-0.00012497	0.497482	0.0345815
			DYN2	P50570	0.00055528	0.00056573	1.045e-05	0.332999	0.257655	119144	119622	478	0.222892	0.218415	0.333719	0.333786	6.73e-05	0.220101	0.0783911
			DYN3	Q9UQ16	1.11e-05	1.128e-05	1.8e-07	0.408818	0.338878	2960	2968	8	0.347	0.359914	0.298424	0.298577	0.00015347	0.0783133	0.30479
			DYR	P00374	9.426e-05	9.54e-05	1.14e-06	0.454819	0.463555	13564	13526	-38	0.507538	0.496818	0.285514	0.285406	-0.00010787	0.467467	0.401927
			DYR1A	Q13627	0.00035537	0.00036271	7.34e-06	0.0601805	0.306763	57198	56686	-512	0.49049	0.334635	0.295321	0.295476	0.00015512	0.0743719	0.327705
			DYR1B	Q9Y463	3.39e-05	3.462e-05	7.2e-07	0.184105	0.433579	6198	6210	12	0.2334	0.422747	0.294043	0.294087	4.472e-05	0.213855	0.341532
			DYRK2	Q92630	4.08e-06	4.14e-06	6e-08	0.410822	0.284152	406	402	-4	0.279559	0.242751	0.254312	0.254247	-6.463e-05	0.462312	0.392697
			DYSF	O75923	3.6e-06	3.66e-06	6e-08	0.392786	0.274816	1256	1256	0	0.321608	0.296591	0.275942	0.275978	3.648e-05	0.251762	0.474674
			E2AK1	Q9BQI3	2e-06	2.04e-06	4e-08	0.390342	0.249042	478	472	-6	0.252505	0.248512	0.28957	0.28939	-0.00018084	0.38392	0.376963
			E2AK2	P19525	0.00057541	0.00059989	2.448e-05	0.0552209	0.238359	147522	150558	3036	0.0462777	0.182694	0.338115	0.338014	-0.00010041	0.456566	0.0636044
			E2AK3	Q9NZJ5	7.627e-05	8.684e-05	1.057e-05	0.00901804	0.473684	16458	17790	1332	0.0251762	0.474607	0.30233	0.302142	-0.00018779	0.431431	0.279955
			E2AK4	Q9P2K8	1.763e-05	1.818e-05	5.5e-07	0.224346	0.37576	7222	7324	102	0.159478	0.441342	0.292726	0.292836	0.00011028	0.129648	0.351892
			E2F1	Q01094	0.00095946	0.00096547	6.01e-06	0.283417	0.16057	204698	198520	-6178	0.111446	0.141891	0.325872	0.324136	-0.0017363	0.226034	0.122232
			E2F2	Q14209	2.277e-05	2.32e-05	4.3e-07	0.402218	0.402518	7206	7184	-22	0.48994	0.439447	0.294518	0.294263	-0.00025415	0.378894	0.33886
			E2F3	O00716	9.429e-05	0.00010068	6.39e-06	0.0695565	0.457633	19684	20310	626	0.0621242	0.456618	0.301409	0.301322	-8.73e-05	0.45106	0.286167
			E2F5	Q15329	3.685e-05	3.931e-05	2.46e-06	0.0410822	0.446421	9638	9862	224	0.0260782	0.473184	0.302435	0.302407	-2.788e-05	0.339034	0.278048
			EAA1	P43003	2.32e-06	2.31e-06	-1e-08	0.104733	0.253192	448	442	-6	0.190141	0.245867	0.261076	0.260856	-0.00021957	0.383149	0.4254
			ECHB	P55084	6.193e-05	5.874e-05	-3.19e-06	0.0531595	0.486463	31560	28376	-3184	0.048	0.418967	0.322116	0.320544	-0.00157197	0.238956	0.144546
			ECSIT	Q9BQ95	2.733e-05	2.807e-05	7.4e-07	0.259036	0.415012	9300	9384	84	0.22992	0.466682	0.295145	0.295147	1.83e-06	0.30715	0.330074
			EDA	Q92838	6e-08	6e-08	0	0.0171371	0.193009	2	2	0	0.984879	0.193831	0.229866	0.229604	-0.00026156	0.314314	0.274822
			EDAR	Q9UNE0	0.00030339	0.00030209	-1.3e-06	0.0310933	0.327465	92888	91292	-1596	0.257805	0.269243	0.289982	0.289438	-0.00054415	0.276276	0.376759
			EDN1	P05305	4.899e-05	5.244e-05	3.45e-06	0.0552209	0.475415	8678	10106	1428	0.00201613	0.475881	0.265091	0.264627	-0.00046392	0.281407	0.44567
			EDN2	P20800	2.473e-05	2.751e-05	2.78e-06	0.0291457	0.413615	5812	7210	1398	0.00301507	0.439841	0.26252	0.261988	-0.00053176	0.263263	0.431737
			EDN3	P14138	5.02e-06	5.72e-06	7e-07	0.0271084	0.302383	826	900	74	0.0231156	0.280572	0.234201	0.233308	-0.00089226	0.243731	0.286476
			EDNRA	P25101	0.00031462	0.00031975	5.13e-06	0.138554	0.320592	42004	42228	224	0.115462	0.372118	0.282973	0.282571	-0.00040142	0.303823	0.424459
			EDNRB	P24530	0.00034927	0.00036623	1.696e-05	0.0342397	0.305687	46194	48036	1842	0.0390782	0.354113	0.286316	0.286237	-7.93e-05	0.478958	0.395978
EF1A1			EF1A1	P68104	0.00985457	0.0100405	0.00018592	0.100402	0.013047	1917558	1908800	-8758	0.197791	0.0122214	0.371144	0.371145	1.18e-06	0.30993	0.01088
			EF1A2	Q05639	0.00049498	0.0004565	-3.848e-05	0.0180542	0.282505	158784	130058	-28726	0.00201613	0.207277	0.338082	0.33437	-0.00371222	0.219439	0.0765433
			EFG1	Q96RP9	0	0	0	1	0.192146	0	0	0	1	0.192946	0.270703	0.270704	7.6e-07	0.318182	0.48713
			EFNB1	P98172	0.00011109	0.00011264	1.55e-06	0.428428	0.446627	26024	25858	-166	0.356855	0.429779	0.310985	0.31093	-5.502e-05	0.407222	0.211058
			EFNB2	P52799	0.00013345	0.00013584	2.39e-06	0.269153	0.424524	25096	25066	-30	0.350453	0.432792	0.300781	0.300822	4.028e-05	0.216867	0.290295
			EGF	P01133	1.451e-05	1.471e-05	2e-07	0.227912	0.357732	3318	3308	-10	0.47495	0.370487	0.314714	0.314654	-5.991e-05	0.419517	0.18037
			EGLN	P17813	0.00011203	0.00010772	-4.31e-06	0.0591182	0.452625	26460	26042	-418	0.205231	0.428929	0.267299	0.266574	-0.00072551	0.263527	0.457355
			EGLN1	Q9GZT9	0	0	0	1	0.192146	0	0	0	1	0.192946	0.267011	0.267029	1.783e-05	0.303912	0.461072
			EGLN2	Q96KS0	0	0	0	1	0.192146	0	0	0	1	0.192946	0.267011	0.267029	1.783e-05	0.303607	0.461072
			EGLN3	Q9H6Z9	0	0	0	1	0.192146	0	0	0	1	0.192946	0.267011	0.267029	1.783e-05	0.302817	0.461072
			EGR1	P18146	6.162e-05	6.16e-05	-2e-08	0.145602	0.491244	17456	15838	-1618	0.0241206	0.484441	0.315804	0.310034	-0.00576963	0.21005	0.218923
			EGR2	P11161	2.28e-06	2.25e-06	-3e-08	0.0490982	0.251916	320	278	-42	0.0221106	0.23186	0.244152	0.241798	-0.00235325	0.224674	0.326991
			EGR4	Q05215	0	0	0	1	0.192146	0	0	0	1	0.192946	0.243141	0.243182	4.131e-05	0.209209	0.332308
			EHD1	Q9H4M9	1.163e-05	1.048e-05	-1.15e-06	0.0180723	0.334783	2538	2040	-498	0.0130785	0.32995	0.280771	0.279928	-0.00084298	0.25	0.44634
			EHMT1	Q9H9B1	2.058e-05	2.193e-05	1.35e-06	0.0560561	0.397677	2034	2108	74	0.0702811	0.331928	0.268542	0.268612	7.026e-05	0.155466	0.472246
			EHMT2	Q96KQ7	0.00067782	0.00068974	1.192e-05	0.247743	0.211415	101542	101472	-70	0.476382	0.250789	0.314514	0.314424	-8.989e-05	0.426707	0.181785
			EID1	Q9Y6B2	8.85e-06	9.37e-06	5.2e-07	0.0833333	0.328732	2306	2358	52	0.105528	0.3413	0.286933	0.286953	2.014e-05	0.281407	0.391859
			EIF2A	Q9BY44	4.401e-05	4.635e-05	2.34e-06	0.0470942	0.462358	7820	8056	236	0.0450902	0.45021	0.311797	0.311691	-0.00010633	0.456827	0.204847
			EIF3A	Q14152	0.00031796	0.00032583	7.87e-06	0.148594	0.318019	57600	57900	300	0.186935	0.33138	0.311545	0.311465	-7.966e-05	0.437876	0.206782
			EIF3B	P55884	0.00045642	0.00049874	4.232e-05	0.0220884	0.271179	98528	102220	3692	0.0432161	0.249008	0.33944	0.339381	-5.887e-05	0.396985	0.0587065
			EIF3E	P60228	0.00294578	0.00301155	6.577e-05	0.111558	0.0524313	561344	560732	-612	0.144144	0.052389	0.350389	0.350331	-5.853e-05	0.389728	0.0355361
			EIF3I	Q13347	0.00107011	0.0011007	3.059e-05	0.157789	0.144572	321066	323664	2598	0.117352	0.0898964	0.354839	0.354772	-6.65e-05	0.409274	0.0285356
			EIF3M	Q7L2H7	0.00019482	0.00020147	6.65e-06	0.10161	0.375181	82220	83512	1292	0.0717172	0.284972	0.342662	0.342624	-3.825e-05	0.363	0.0499689
			ELAV1	Q15717	0.00129497	0.00131862	2.365e-05	0.0150754	0.11859	376922	366316	-10606	0.12337	0.0798735	0.310234	0.310146	-8.771e-05	0.417252	0.21827
			ELF1	P32519	4.919e-05	4.194e-05	-7.25e-06	0.0310621	0.453152	12492	9394	-3098	0.00802407	0.466807	0.299378	0.292215	-0.00716296	0.210262	0.356277
			ELF3	P78545	0.00131579	0.00131451	-1.28e-06	0.137827	0.118861	211886	198786	-13100	0.0610611	0.141719	0.33142	0.329536	-0.00188471	0.24024	0.0961615
			ELF4	Q99607	1.62e-06	1.69e-06	7e-08	0.136546	0.240884	342	360	18	0.057	0.23925	0.261628	0.261133	-0.00049446	0.27666	0.427066
			ELK1	P19419	0.00067864	0.00069821	1.957e-05	0.126135	0.210282	153374	154306	932	0.122244	0.178327	0.333719	0.333689	-2.978e-05	0.34107	0.078775
			ELK3	P41970	0.00018931	0.00019592	6.61e-06	0.136683	0.379646	50132	50734	602	0.11747	0.347822	0.322326	0.322254	-7.111e-05	0.423848	0.133265
			ELK4	P28324	3.556e-05	3.647e-05	9.1e-07	0.205411	0.438884	10174	10208	34	0.387324	0.476751	0.293719	0.293636	-8.284e-05	0.439638	0.34671
			ELL	P55199	4.99e-06	5.09e-06	1e-07	0.275551	0.296294	924	918	-6	0.446339	0.281465	0.281753	0.281716	-3.763e-05	0.365462	0.431342
			ELMD2	Q8IZ81	0	0	0	1	0.192146	0	0	0	1	0.192946	0.229653	0.229543	-0.00010952	0.444333	0.274566
			ELMO1	Q92556	2.023e-05	2.032e-05	9e-08	0.224572	0.389367	3516	3516	0	0.301603	0.37431	0.276801	0.27671	-9.106e-05	0.490946	0.468241
			ELMO2	Q96JJ3	0	0	0	1	0.192146	0	0	0	1	0.192946	0.252092	0.25205	-4.129e-05	0.41809	0.382325
			ELOB	Q15370	0.00011046	0.00011387	3.41e-06	0.153072	0.444618	21672	21906	234	0.141851	0.44775	0.301252	0.300848	-0.00040413	0.308543	0.290049
			ELOC	Q15369	0.00091367	0.00092582	1.215e-05	0.170512	0.166431	132832	132536	-296	0.126633	0.203173	0.310985	0.310734	-0.00025151	0.363727	0.212792
			ELOF1	P60002	0	0	0	1	0.192146	0	0	0	1	0.192946	0.242919	0.242822	-9.737e-05	0.453172	0.329825
			ELP1	O95163	0.00155279	0.00156819	1.54e-05	0.318273	0.0998476	269940	262526	-7414	0.111222	0.107695	0.309016	0.308949	-6.739e-05	0.433433	0.228158
			ELP3	Q9H9T3	1.493e-05	1.536e-05	4.3e-07	0.196158	0.361933	2614	2604	-10	0.409639	0.350841	0.282834	0.282618	-0.00021643	0.380522	0.42401
			EMAL4	Q9HC35	0	0	0	1	0.192146	0	0	0	1	0.192946	0.238341	0.23825	-9.074e-05	0.442211	0.308234
			EMD	P50402	0.0011076	0.00111511	7.51e-06	0.321643	0.143418	201942	198270	-3672	0.154774	0.142062	0.330378	0.330263	-0.00011466	0.47379	0.0921023
			ENAH	Q8N8S7	0.00017614	0.00017993	3.79e-06	0.102513	0.390291	31690	31848	158	0.110553	0.404834	0.288654	0.288686	3.195e-05	0.255767	0.381538
			ENL	Q03111	0	0	0	1	0.192146	0	0	0	1	0.192946	0.240191	0.237789	-0.00240203	0.217217	0.305149
			ENOA	P06733	0.00070999	0.000729	1.901e-05	0.0677452	0.202492	169706	168766	-940	0.37249	0.167259	0.347368	0.347291	-7.753e-05	0.421421	0.0395139
			ENOG	P09104	0.0014268	0.00143752	1.072e-05	0.271084	0.109745	177266	174112	-3154	0.163327	0.161722	0.26823	0.268173	-5.742e-05	0.465327	0.468161
			ENPL	P14625	0.00264128	0.00265257	1.129e-05	0.25677	0.0602888	513374	493980	-19394	0.116466	0.0603588	0.314172	0.313765	-0.00040692	0.323263	0.186019
			ENSA	O43768	0	0	0	1	0.192146	0	0	0	1	0.192946	0.211513	0.211477	-3.562e-05	0.466667	0.238137
			EP15	P42566	0.00088925	0.00090702	1.777e-05	0.135952	0.169205	149418	150494	1076	0.102513	0.182739	0.328343	0.328185	-0.00015806	0.452811	0.101523
			EP15R	Q9UBC2	1.08e-06	1.06e-06	-2e-08	0.06143	0.226729	224	222	-2	0.342424	0.225749	0.229866	0.229635	-0.00023092	0.342052	0.274928
			EPAS1	Q99814	9.219e-05	9.619e-05	4e-06	0.0722892	0.462369	19310	19792	482	0.054326	0.460506	0.304214	0.30401	-0.00020433	0.404834	0.267649
			EPHA1	P21709	0	0	0	1	0.192146	0	0	0	1	0.192946	0.253809	0.25376	-4.902e-05	0.432161	0.38961
			EPHA2	P29317	0.00122044	0.00122894	8.5e-06	0.378894	0.127899	180156	176832	-3324	0.150602	0.158487	0.326825	0.326782	-4.264e-05	0.390171	0.107835
			EPHA3	P29320	3.531e-05	3.577e-05	4.6e-07	0.47	0.437066	5658	5692	34	0.207415	0.413952	0.299119	0.299122	2.79e-06	0.288153	0.300831
			EPHA4	P54764	3.365e-05	3.429e-05	6.4e-07	0.288288	0.432684	6958	6968	10	0.240964	0.435384	0.285608	0.285643	3.484e-05	0.240964	0.399984
			EPHB1	P54762	3.313e-05	3.359e-05	4.6e-07	0.430723	0.430782	7058	7062	4	0.262575	0.437438	0.309568	0.309588	1.958e-05	0.259557	0.222307
			EPHB2	P29323	0.00127731	0.00129818	2.087e-05	0.232465	0.120708	222142	221616	-526	0.311492	0.125276	0.335919	0.335936	1.741e-05	0.301508	0.0705018
			EPHB3	P54753	0.00020489	0.00020807	3.18e-06	0.283852	0.371317	35094	35102	8	0.224121	0.393466	0.296661	0.296801	0.00013994	0.0934673	0.318746
			EPHB4	P54760	1.588e-05	1.593e-05	5e-08	0.181087	0.364987	3804	3734	-70	0.0872618	0.379388	0.295522	0.295349	-0.00017315	0.435045	0.328564
			EPIPL	P58107	0.0008535	0.00086163	8.13e-06	0.396985	0.176903	188400	177504	-10896	0.0422111	0.15786	0.332151	0.331216	-0.00093475	0.234642	0.088983
			EPN1	Q9Y6I3	0.00048959	0.00049054	9.5e-07	0.0592965	0.273902	76636	74612	-2024	0.104313	0.299969	0.294468	0.294062	-0.00040521	0.320281	0.341887
			EPN2	O95208	3.27e-06	3.34e-06	7e-08	0.246231	0.269265	870	896	26	0.0742227	0.280331	0.28887	0.288323	-0.00054736	0.274824	0.384134
			EPO	P01588	3e-07	3e-07	0	0.106426	0.200311	54	54	0	0.878879	0.200227	0.257832	0.257828	-3.96e-06	0.294058	0.412796
			EPOR	P19235	0.00136562	0.00138959	2.397e-05	0.168675	0.113901	289450	289604	154	0.15261	0.100468	0.33934	0.339381	4.086e-05	0.238143	0.0587065
			EPS8	Q12929	0.000854	0.00086941	1.541e-05	0.133534	0.175935	145328	146028	700	0.110775	0.188248	0.322626	0.322617	-8.77e-06	0.312185	0.130843
ERBB2			ERBB2	P04626	0.00623252	0.00627806	4.554e-05	0.461229	0.0254786	1352200	1334830	-17370	0.342424	0.0230505	0.36336	0.363157	-0.00020312	0.434608	0.0193045
			ERBB3	P21860	0.00196824	0.00199179	2.355e-05	0.321608	0.0797418	438966	437064	-1902	0.300805	0.0675236	0.344262	0.344166	-9.672e-05	0.442211	0.0464396
			ERBB4	Q15303	0.00249298	0.00251101	1.803e-05	0.40546	0.0625843	444864	439070	-5794	0.268072	0.0670698	0.33644	0.336264	-0.00017626	0.475952	0.0695036
			ERCC2	P18074	1.187e-05	1.205e-05	1.8e-07	0.40402	0.34448	2302	2296	-6	0.495984	0.339531	0.294718	0.294667	-5.149e-05	0.401204	0.334209
			EREG	O14944	0	0	0	1	0.192146	0	0	0	1	0.192946	0.290469	0.290268	-0.00020044	0.39759	0.371589
			ERG19	P53602	0.00015291	0.00014632	-6.59e-06	0.0372233	0.416035	25126	22546	-2580	0.0261569	0.444461	0.269252	0.268382	-0.00086962	0.258032	0.469882
			ERH	P84090	0.00087659	0.00089497	1.838e-05	0.0573441	0.171894	135176	135102	-74	0.129518	0.199623	0.323892	0.323679	-0.00021355	0.398195	0.125058
			ERN1	O75460	0.00012672	0.00012841	1.69e-06	0.374245	0.430827	26064	25604	-460	0.110331	0.430661	0.303548	0.303153	-0.00039489	0.305221	0.272832
			ERRFI	Q9UJM3	3.74e-06	3.78e-06	4e-08	0.346734	0.277576	1726	1716	-10	0.303912	0.317101	0.297476	0.297314	-0.00016232	0.422267	0.315888
			ESPB1	Q96BH3	3.22e-06	3.27e-06	5e-08	0.480441	0.268025	688	688	0	0.538693	0.264624	0.269797	0.269834	3.702e-05	0.252261	0.481036
			ESR2	Q92731	0.00053385	0.0005511	1.725e-05	0.0876133	0.261205	129158	131204	2046	0.079397	0.205312	0.336866	0.336824	-4.208e-05	0.378514	0.0677146
			EST1	P23141	0	0	0	1	0.192146	0	0	0	1	0.192946	0.234788	0.234692	-9.542e-05	0.472417	0.291852
			ESYT1	Q9BSJ8	0	0	0	1	0.192146	0	0	0	1	0.192946	0.29081	0.290464	-0.00034576	0.312249	0.369852
			ETS1	P14921	0.00069939	0.00068765	-1.174e-05	0.0763819	0.211626	177688	170714	-6974	0.0978809	0.165165	0.332406	0.330485	-0.00192111	0.226453	0.0912007
			ETS2	P15036	0.00044705	0.00046864	2.159e-05	0.0380762	0.279896	84046	86130	2084	0.0501505	0.280826	0.314514	0.314424	-8.989e-05	0.464718	0.181785
			ETV5	P41161	0	0	0	1	0.192146	0	0	0	1	0.192946	0.277778	0.27729	-0.00048784	0.279678	0.464
			EVI1	Q03112	1.856e-05	2.385e-05	5.29e-06	0.0080402	0.404535	5550	6122	572	0.0301508	0.421233	0.297885	0.297828	-5.698e-05	0.400602	0.311588
			EVL	Q9UI08	0.00058935	0.00059374	4.39e-06	0.339698	0.240872	94000	92610	-1390	0.258291	0.266062	0.313263	0.313336	7.355e-05	0.196177	0.189697
			EXOC2	Q96KP1	8.7e-07	9.1e-07	4e-08	0.0663984	0.222818	260	262	2	0.183283	0.22923	0.237231	0.237085	-0.00014627	0.375752	0.301693
			EXOS1	Q9Y3B2	3.18e-06	3.27e-06	9e-08	0.103622	0.268025	206	208	2	0.17422	0.224293	0.201805	0.20177	-3.514e-05	0.441884	0.221956
			EXOS8	Q96B26	0.00099138	0.00099652	5.14e-06	0.18191	0.155908	129926	126224	-3702	0.0832497	0.211451	0.247359	0.24727	-8.854e-05	0.452069	0.352532
			EZH2	Q15910	0.00073634	0.00074619	9.85e-06	0.118474	0.198275	125978	124768	-1210	0.453266	0.213407	0.309596	0.309532	-6.377e-05	0.394153	0.222903
EZRI			EZRI	P15311	0.00727983	0.00722459	-5.524e-05	0.153153	0.0203879	1404472	1373948	-30524	0.191191	0.0218477	0.366202	0.365898	-0.00030391	0.401804	0.0161971
			F102A	Q5T9C2	0	0	0	1	0.192146	0	0	0	1	0.192946	0.2389	0.238349	-0.00055047	0.251251	0.308652
			F107A	O95990	0.00011758	0.00011922	1.64e-06	0.492507	0.438813	21122	21106	-16	0.385542	0.452106	0.294718	0.294364	-0.00035389	0.346038	0.337579
			F10A1	P50502	0.00073325	0.00074786	1.461e-05	0.277387	0.198001	125790	126326	536	0.227043	0.211345	0.323953	0.323892	-6.091e-05	0.405051	0.123718
			F120A	Q9NZB2	0	0	0	1	0.192146	0	0	0	1	0.192946	0.257717	0.257558	-0.000159	0.429288	0.410464
			F120B	Q96EK7	0	0	0	1	0.192146	0	0	0	1	0.192946	0.261017	0.260738	-0.00027913	0.323944	0.424865
			F120C	Q9NX05	0	0	0	1	0.192146	0	0	0	1	0.192946	0.248334	0.248233	-0.0001006	0.475952	0.358607
			FA5	P12259	0.00026751	0.00023419	-3.332e-05	0.0201816	0.35653	37140	30478	-6662	0.0240722	0.411016	0.284646	0.283642	-0.00100399	0.234234	0.414359
			FA57A	Q8TBR7	0	0	0	1	0.192146	0	0	0	1	0.192946	0.23772	0.237428	-0.00029111	0.272818	0.303019
			FA60A	Q9NP50	0	0	0	1	0.192146	0	0	0	1	0.192946	0.190972	0.190936	-3.64e-05	0.463783	0.190557
			FABP4	P15090	1.35e-06	1.38e-06	3e-08	0.324623	0.23424	398	406	8	0.147295	0.243558	0.291495	0.291275	-0.00021963	0.378894	0.362543
			FABP5	Q01469	0.00010712	0.00011111	3.99e-06	0.114919	0.449119	37336	37984	648	0.0542714	0.384464	0.304803	0.304818	1.461e-05	0.292339	0.26111
			FACR1	Q8WVX9	2.39e-06	2.42e-06	3e-08	0.459215	0.254652	272	268	-4	0.240201	0.229877	0.239676	0.239593	-8.28e-05	0.494483	0.313787
			FADD	Q13158	0.00082404	0.00084922	2.518e-05	0.105422	0.179165	182812	183446	634	0.170191	0.15205	0.327381	0.327124	-0.00025683	0.40321	0.105465
			FAF1	Q9UNN5	5.998e-05	5.529e-05	-4.69e-06	0.0482897	0.480325	15008	12124	-2884	0.0210632	0.491013	0.308741	0.30254	-0.00620077	0.210843	0.277072
			FAIM2	Q9BWQ8	0	0	0	1	0.192146	0	0	0	1	0.192946	0.26082	0.260777	-4.314e-05	0.450251	0.425037
FAK1			FAK1	Q05397	0.00647326	0.00651056	3.73e-05	0.332661	0.0242332	1375072	1360728	-14344	0.39479	0.0223711	0.372942	0.372874	-6.755e-05	0.419258	0.00967866
			FAK2	Q14289	0.00287167	0.0029189	4.723e-05	0.262575	0.054	620126	619550	-576	0.209839	0.0481514	0.356481	0.356462	-1.918e-05	0.350101	0.0263625
			FANCJ	Q9BX63	0	0	0	1	0.192146	0	0	0	1	0.192946	0.271743	0.271515	-0.00022805	0.376506	0.494119
			FAS	P49327	8.434e-05	8.243e-05	-1.91e-06	0.0684794	0.479583	20946	18852	-2094	0.0463243	0.467591	0.31589	0.315288	-0.00060216	0.257286	0.175695
			FBF1	Q8TES7	2.578e-05	2.604e-05	2.6e-07	0.353414	0.410627	3656	3638	-18	0.403808	0.376321	0.280091	0.27986	-0.00023038	0.372116	0.446996
			FBLN2	P98095	0.00057335	0.00059747	2.412e-05	0.0781563	0.239556	71104	71834	730	0.135952	0.304544	0.277867	0.27767	-0.00019666	0.418511	0.461478
			FBW1A	Q9Y297	0.00112326	0.00107092	-5.234e-05	0.0310933	0.147654	197008	165110	-31898	0.0060423	0.170295	0.324895	0.320425	-0.00447001	0.209045	0.145226
			FBW1B	Q9UKB1	0.00032373	0.00030515	-1.858e-05	0.0432161	0.326193	64536	56190	-8346	0.0151362	0.335613	0.315833	0.311099	-0.00473359	0.21328	0.209674
			FBX3	Q9UK99	0	0	0	1	0.192146	0	0	0	1	0.192946	0.243226	0.243131	-9.556e-05	0.449698	0.331963
			FBXW5	Q969U6	0	0	0	1	0.192146	0	0	0	1	0.192946	0.257889	0.256426	-0.00146371	0.230924	0.404651
			FBXW7	Q969H0	0.00011185	0.00011685	5e-06	0.0673367	0.441171	34722	33560	-1162	0.11245	0.39915	0.311041	0.307816	-0.00322516	0.21148	0.23752
			FCAR	P24071	3.734e-05	3.831e-05	9.7e-07	0.128024	0.443677	5876	5864	-12	0.451807	0.416119	0.274847	0.274876	2.891e-05	0.27291	0.480303
			FCER2	P06734	3.888e-05	4.135e-05	2.47e-06	0.0674723	0.451629	7292	7554	262	0.0732197	0.444718	0.288943	0.288855	-8.731e-05	0.431017	0.380108
			FCERA	P12319	0.00057922	0.00058312	3.9e-06	0.262575	0.245233	98484	97334	-1150	0.45171	0.257243	0.266497	0.266388	-0.00010941	0.476954	0.455319
			FCERB	Q01362	0.00010564	0.00010708	1.44e-06	0.208626	0.45301	22776	22720	-56	0.21988	0.443645	0.306963	0.306965	1.98e-06	0.306613	0.243702
			FCERG	P30273	0.00126532	0.0012728	7.48e-06	0.290161	0.123578	208764	208084	-680	0.141566	0.133668	0.309016	0.308755	-0.00026139	0.341709	0.230277
			FCG2A	P12318	5.889e-05	5.956e-05	6.7e-07	0.462387	0.487778	15646	15622	-24	0.324975	0.485699	0.307508	0.307486	-2.184e-05	0.350402	0.239784
			FCG2B	P31994	0.00030427	0.0003098	5.53e-06	0.240722	0.324648	75750	75830	80	0.238	0.298123	0.330189	0.330326	0.00013762	0.133065	0.0918321
			FCG2C	P31995	7.512e-05	7.618e-05	1.06e-06	0.283133	0.488794	19564	19472	-92	0.431431	0.463476	0.318738	0.318822	8.386e-05	0.18429	0.153323
			FCG3A	P08637	0.00011126	0.00011288	1.62e-06	0.38014	0.446198	19348	19296	-52	0.429288	0.464782	0.297374	0.297365	-8.83e-06	0.326653	0.315578
			FCG3B	O75015	0	0	0	1	0.192146	0	0	0	1	0.192946	0.236341	0.236206	-0.00013489	0.420842	0.298077
			FCGR1	P12314	9.595e-05	9.691e-05	9.6e-07	0.440969	0.46117	19992	19924	-68	0.435045	0.459349	0.294593	0.294591	-1.87e-06	0.299299	0.335048
			FCRL3	Q96P31	0	0	0	1	0.192146	0	0	0	1	0.192946	0.255474	0.255398	-7.636e-05	0.488465	0.397023
			FER	P16591	0.00010162	0.00010369	2.07e-06	0.269539	0.455154	30664	30780	116	0.25227	0.409683	0.321966	0.321833	-0.00013355	0.468278	0.136097
			FES	P07332	0.00047498	0.00048275	7.77e-06	0.123618	0.276308	91498	90050	-1448	0.173737	0.272115	0.328592	0.328435	-0.00015664	0.446231	0.10028
			FETA	P02771	3.071e-05	3.111e-05	4e-07	0.495486	0.423725	4796	4704	-92	0.207831	0.39915	0.268709	0.268591	-0.00011731	0.459839	0.47199
			FEZ1	Q99689	0.00077968	0.00078604	6.36e-06	0.417505	0.188356	122766	117946	-4820	0.0372233	0.220476	0.293197	0.292712	-0.00048485	0.288732	0.352832
			FFAR1	O14842	0	0	0	1	0.192146	0	0	0	1	0.192946	0.247695	0.24759	-0.00010435	0.449949	0.355015
			FFAR2	O15552	0	0	0	1	0.192146	0	0	0	1	0.192946	0.247996	0.247876	-0.00012043	0.446339	0.356362
			FFAR3	O14843	0	0	0	1	0.192146	0	0	0	1	0.192946	0.24106	0.240918	-0.00014193	0.411055	0.322028
			FGD1	P98174	3.57e-06	3.62e-06	5e-08	0.588766	0.273813	842	834	-8	0.292757	0.276413	0.272341	0.272375	3.334e-05	0.243487	0.499591
			FGF1	P05230	0.00019684	0.0001995	2.66e-06	0.349798	0.37687	48304	47192	-1112	0.131658	0.356939	0.29628	0.296035	-0.00024537	0.370221	0.323908
			FGF10	O15520	0	0	0	1	0.192146	0	0	0	1	0.192946	0.232582	0.23252	-6.111e-05	0.460765	0.283486
			FGF12	P61328	0	0	0	1	0.192146	0	0	0	1	0.192946	0.241329	0.241239	-8.974e-05	0.470411	0.323534
			FGF13	Q92913	4.35e-06	4.42e-06	7e-08	0.442211	0.287148	406	406	0	0.53661	0.243558	0.242919	0.242839	-8.024e-05	0.481964	0.329896
			FGF17	O60258	3.15e-06	3.25e-06	1e-07	0.139418	0.267538	1322	1328	6	0.254032	0.301589	0.260272	0.260245	-2.694e-05	0.396378	0.422262
			FGF18	O76093	3.15e-06	3.25e-06	1e-07	0.139558	0.267538	1322	1328	6	0.254271	0.301589	0.260272	0.260245	-2.694e-05	0.395792	0.422262
			FGF19	O95750	0	0	0	1	0.192146	0	0	0	1	0.192946	0.228231	0.227932	-0.00029887	0.285427	0.270274
			FGF2	P09038	0.00174173	0.00175259	1.086e-05	0.298897	0.0907876	277054	270894	-6160	0.123618	0.10548	0.304508	0.304064	-0.0004447	0.289579	0.267261
			FGF23	Q9GZV9	3.9e-07	4e-07	1e-08	0.1571	0.204511	110	110	0	0.938693	0.209248	0.247288	0.247252	-3.569e-05	0.432866	0.352397
			FGF3	P11487	2.52e-05	2.605e-05	8.5e-07	0.118832	0.410628	7400	7474	74	0.140845	0.443313	0.271552	0.271558	6.47e-06	0.286432	0.494598
			FGF4	P08620	8.126e-05	8.364e-05	2.38e-06	0.0841683	0.478102	14058	13986	-72	0.504505	0.494289	0.269022	0.268048	-0.00097408	0.239196	0.467192
			FGF5	P12034	3.15e-06	3.25e-06	1e-07	0.138693	0.267538	1322	1328	6	0.254783	0.301589	0.260272	0.260245	-2.694e-05	0.395582	0.422262
			FGF6	P10767	3.15e-06	3.25e-06	1e-07	0.140562	0.267538	1322	1328	6	0.254509	0.301589	0.260272	0.260245	-2.694e-05	0.395582	0.422262
			FGF7	P21781	9.092e-05	9.118e-05	2.6e-07	0.202621	0.468996	13732	13540	-192	0.186117	0.496732	0.272149	0.271923	-0.00022603	0.38833	0.496842
			FGF8	P55075	3.15e-06	3.25e-06	1e-07	0.138554	0.267538	1322	1328	6	0.253776	0.301589	0.260272	0.260245	-2.694e-05	0.397384	0.422262
			FGF9	P31371	3.15e-06	3.25e-06	1e-07	0.137688	0.267538	1322	1328	6	0.254527	0.301589	0.260272	0.260245	-2.694e-05	0.39759	0.422262
FGFR1			FGFR1	P11362	0.00433031	0.00440815	7.784e-05	0.146293	0.0345403	707644	703760	-3884	0.307307	0.0423955	0.339839	0.339749	-8.987e-05	0.472892	0.0575585
			FGFR2	P21802	0.00213774	0.00217032	3.258e-05	0.0901804	0.0720559	364934	366848	1914	0.0901804	0.0798006	0.303044	0.30294	-0.00010393	0.471888	0.274065
			FGFR3	P22607	0.00288878	0.00291599	2.721e-05	0.303734	0.054071	521078	500820	-20258	0.0956697	0.0593015	0.315775	0.315664	-0.0001111	0.485427	0.173149
			FGFR4	P22455	0.00103321	0.00103608	2.87e-06	0.146146	0.151099	201932	195920	-6012	0.0985915	0.143728	0.295699	0.295197	-0.00050166	0.279397	0.329672
			FGR	P09769	0.00111475	0.00116517	5.042e-05	0.0551655	0.135285	218800	222898	4098	0.0592369	0.124714	0.33142	0.331376	-4.461e-05	0.39318	0.0884304
FHL2			FHL2	Q14192	0.00487951	0.00499505	0.00011554	0.0805639	0.0308815	802716	802784	68	0.175227	0.037699	0.353824	0.35357	-0.00025457	0.404834	0.0298996
			FHL5	Q5TD97	0.00051018	0.00050957	-6.1e-07	0.0837538	0.269327	65280	63912	-1368	0.15996	0.3167	0.286814	0.286499	-0.00031493	0.352705	0.394077
			FIBG	P02679	4.31e-06	2.56e-06	-1.75e-06	0.0191339	0.257193	792	570	-222	0.0231388	0.257886	0.25893	0.255209	-0.00372119	0.213427	0.396209
FINC			FINC	P02751	0.0115923	0.0118312	0.00023887	0.109438	0.00954443	1585988	1580338	-5650	0.197593	0.0168057	0.343886	0.343856	-3.032e-05	0.332999	0.0471531
			FKB1A	P62942	0.00040127	0.00040886	7.59e-06	0.160966	0.293481	51694	52048	354	0.0873494	0.344121	0.293296	0.293386	8.952e-05	0.171171	0.348466
			FKBP8	Q14318	6.975e-05	7.159e-05	1.84e-06	0.257545	0.494811	19968	20214	246	0.167839	0.457221	0.310012	0.309978	-3.324e-05	0.386158	0.219246
			FLI1	Q01543	2.038e-05	2.095e-05	5.7e-07	0.176353	0.392751	4130	4150	20	0.28012	0.39019	0.285703	0.285548	-0.00015414	0.454363	0.400806
			FLII	Q13045	0.00086877	0.0008917	2.293e-05	0.0401204	0.172244	109314	108934	-380	0.20402	0.236033	0.318445	0.31835	-9.502e-05	0.467936	0.156261
FLNA			FLNA	P21333	0.0086151	0.00869726	8.216e-05	0.473843	0.0161307	1608364	1595832	-12532	0.467467	0.0164187	0.37663	0.376586	-4.4e-05	0.405622	0.00637001
			FLNB	O75369	0.00021595	0.00022176	5.81e-06	0.162814	0.362753	57022	57514	492	0.181269	0.332616	0.324742	0.324778	3.599e-05	0.253253	0.11913
			FLNC	Q14315	0.00190892	0.0019259	1.698e-05	0.232465	0.0830049	355774	350824	-4950	0.310241	0.0829139	0.322686	0.322768	8.24e-05	0.186935	0.130046
			FLOT1	O75955	0.00045333	0.00045885	5.52e-06	0.119238	0.282002	48124	47636	-488	0.456	0.355643	0.305125	0.305088	-3.729e-05	0.37827	0.258772
			FLOT2	Q14254	7.655e-05	7.822e-05	1.67e-06	0.244489	0.485549	17700	17726	26	0.346734	0.475099	0.304883	0.304953	6.919e-05	0.197183	0.259965
			FLT3	P36888	0.00021057	0.00021236	1.79e-06	0.367367	0.368978	29296	28984	-312	0.349349	0.416786	0.308768	0.308423	-0.00034555	0.336336	0.233424
			FLT3L	P49771	1.898e-05	1.935e-05	3.7e-07	0.20662	0.38451	3020	3080	60	0.0563948	0.363816	0.257717	0.257615	-0.00010117	0.489468	0.410845
			FMNL2	Q96PY5	0	0	0	1	0.192146	0	0	0	1	0.192946	0.244911	0.244843	-6.815e-05	0.476429	0.340584
			FMR1	Q06787	0.00019553	0.00019948	3.95e-06	0.163655	0.376889	43760	43390	-370	0.365288	0.36813	0.310651	0.310594	-5.713e-05	0.376128	0.214219
			FNBP4	Q8N3X1	4.471e-05	4.579e-05	1.08e-06	0.201807	0.460903	7230	7296	66	0.141557	0.440977	0.290981	0.291029	4.815e-05	0.214502	0.364875
			FOLR1	P15328	0	0	0	1	0.192146	0	0	0	1	0.192946	0.268085	0.26811	2.519e-05	0.27163	0.467683
			FOS	P01100	0.00147605	0.00149027	1.422e-05	0.498994	0.105516	348594	331428	-17166	0.079397	0.0877299	0.339506	0.336659	-0.00284733	0.226908	0.0682121
			FOSB	P53539	0.00010255	0.00010727	4.72e-06	0.0684105	0.452904	22186	22802	616	0.0572289	0.443301	0.291103	0.290857	-0.00024623	0.389336	0.366717
			FOSL1	P15407	1.936e-05	1.962e-05	2.6e-07	0.374122	0.386435	3694	3724	30	0.192578	0.379102	0.266826	0.266306	-0.0005202	0.284284	0.454607
			FOSL2	P15408	5e-08	5e-08	0	0.0331658	0.192449	8	8	0	0.966801	0.195578	0.268002	0.267319	-0.00068313	0.255276	0.46296
			FOXA1	P55317	3e-06	3.08e-06	8e-08	0.197183	0.263074	696	696	0	0.594784	0.265228	0.279774	0.279519	-0.00025467	0.353353	0.44998
			FOXA2	Q9Y261	1.935e-05	2.176e-05	2.41e-06	0.0190572	0.396733	2122	2296	174	0.0302419	0.339531	0.25864	0.257442	-0.00119796	0.232698	0.40991
			FOXG1	P55316	4.921e-05	5.42e-05	4.99e-06	0.0151057	0.478503	10152	11044	892	0.184554	0.481821	0.299197	0.299096	-0.00010068	0.468214	0.301007
			FOXM1	Q08050	1.544e-05	1.634e-05	9e-07	0.081407	0.366976	5944	6126	182	0.0865191	0.421301	0.300208	0.300009	-0.00019922	0.414659	0.295492
			FOXO1	Q12778	0.00154537	0.00159664	5.127e-05	0.0301811	0.0985216	301954	305212	3258	0.0441767	0.0953644	0.340206	0.340152	-5.4e-05	0.388164	0.0561902
			FOXO3	O43524	0.00022954	0.00024304	1.35e-05	0.0523139	0.352223	60826	62542	1716	0.0591775	0.319242	0.326118	0.32604	-7.806e-05	0.434171	0.111863
			FOXO4	P98177	4.763e-05	5.009e-05	2.46e-06	0.0744467	0.470701	19214	19688	474	0.0661986	0.461498	0.320893	0.320902	9.72e-06	0.316213	0.142181
			FOXP1	Q9H334	1.37e-06	1.39e-06	2e-08	0.734469	0.234595	208	208	0	0.824121	0.224293	0.251397	0.251461	6.448e-05	0.167002	0.378772
			FOXP3	Q9BZS1	4.091e-05	4.137e-05	4.6e-07	0.435176	0.45163	6826	6696	-130	0.191383	0.431209	0.243192	0.243234	4.166e-05	0.213213	0.332648
			FPR1	P21462	8.06e-06	8.64e-06	5.8e-07	0.0856855	0.323344	2232	2196	-36	0.155936	0.335219	0.289256	0.288492	-0.00076404	0.247	0.38302
			FPRP	Q9P2B2	0	0	0	1	0.192146	0	0	0	1	0.192946	0.254181	0.254135	-4.667e-05	0.414904	0.392128
			FRAP	P42345	0.00114017	0.00115697	1.68e-05	0.230151	0.139414	198916	197952	-964	0.38191	0.142287	0.332949	0.332914	-3.477e-05	0.400802	0.0813206
			FRAT1	Q92837	6.2e-07	6.3e-07	1e-08	0.27984	0.216153	174	176	2	0.231156	0.220704	0.26823	0.267985	-0.00024533	0.351703	0.466667
			FRAT2	O75474	0	0	0	1	0.192146	0	0	0	1	0.192946	0.262998	0.262728	-0.00027006	0.319556	0.435378
			FRK	P42685	3.06e-06	3.32e-06	2.6e-07	0.056338	0.268951	1258	1326	68	0.0461847	0.301453	0.280476	0.280407	-6.863e-05	0.46371	0.442581
			FRS2	Q8WU20	0.0001942	0.0001973	3.1e-06	0.349349	0.37874	61396	61206	-190	0.47342	0.322891	0.337818	0.337882	6.353e-05	0.215292	0.0642529
			FRS3	O43559	0.00011096	0.00011302	2.06e-06	0.282282	0.445956	22382	22346	-36	0.438191	0.44541	0.316699	0.31671	1.095e-05	0.272818	0.165959
			FSHB	P01225	0	0	0	1	0.192146	0	0	0	1	0.192946	0.231835	0.231769	-6.57e-05	0.497487	0.281399
			FSHR	P23945	0.00087139	0.00087912	7.73e-06	0.500502	0.17454	117238	116142	-1096	0.426131	0.222858	0.296992	0.296878	-0.00011381	0.472	0.318368
			FUBP2	Q92945	0.00042743	0.00043099	3.56e-06	0.435306	0.288016	60896	60096	-800	0.189707	0.326065	0.320092	0.319978	-0.00011469	0.49498	0.147516
			FUMH	P07954	2.59e-06	2.82e-06	2.3e-07	0.0310933	0.260368	2252	2348	96	0.0613682	0.341086	0.27387	0.273045	-0.00082516	0.243216	0.49498
			FUSIP	O75494	4.242e-05	4.32e-05	7.8e-07	0.30715	0.456406	14504	14546	42	0.285571	0.491518	0.312528	0.312625	9.67e-05	0.162814	0.194753
			FXR1	P51114	0.00038808	0.00038842	3.4e-07	0.149299	0.299233	97746	94118	-3628	0.117825	0.263378	0.306691	0.306528	-0.00016371	0.461229	0.247906
			FXR2	P51116	0.00205143	0.0020646	1.317e-05	0.326962	0.0770637	401308	390620	-10688	0.143001	0.074774	0.317511	0.317352	-0.00015921	0.495486	0.161646
			FYB	O15117	0.00011744	0.00011935	1.91e-06	0.24024	0.438725	26588	26632	44	0.201207	0.425775	0.312867	0.312994	0.00012763	0.123123	0.191989
			FZD1	Q9UP38	0.00171332	0.00172449	1.117e-05	0.41407	0.0928442	229944	226374	-3570	0.310484	0.12358	0.211487	0.211321	-0.0001656	0.345035	0.237586
			FZD4	Q9ULV1	2.27e-05	2.322e-05	5.2e-07	0.199396	0.402519	4130	4140	10	0.311806	0.389966	0.283204	0.283199	-4.97e-06	0.314945	0.418495
			FZD5	Q13467	4.2e-07	4.2e-07	0	0.018018	0.205142	8	8	0	0.967871	0.195578	0.1487	0.148618	-8.137e-05	0.355422	0.063365
			FZD6	O60353	0	0	0	1	0.192146	0	0	0	1	0.192946	0.148681	0.148599	-8.148e-05	0.353119	0.0633128
			FZD7	O75084	0	0	0	1	0.192146	0	0	0	1	0.192946	0.248085	0.247911	-0.00017351	0.350101	0.35647
			FZD8	Q9H461	0	0	0	1	0.192146	0	0	0	1	0.192946	0.215231	0.215219	-1.16e-05	0.341709	0.246568
			FZD9	O00144	0.00059387	0.00059811	4.24e-06	0.230614	0.239062	115240	112754	-2486	0.132663	0.228931	0.18232	0.182271	-4.973e-05	0.467871	0.161264
			FZR	Q9UM11	0.00011127	0.00011276	1.49e-06	0.388778	0.446417	15284	15114	-170	0.236473	0.488271	0.27603	0.275868	-0.00016203	0.432161	0.475325
			G3BP1	Q13283	0.00012507	0.00012703	1.96e-06	0.457831	0.432475	56426	56764	338	0.225709	0.334479	0.329247	0.329189	-5.845e-05	0.434303	0.0972765
G3P		G3P	G3P	P04406	0.00344245	0.00364301	0.00020056	0.038038	0.0437485	781570	785982	4412	0.102307	0.0386111	0.36655	0.36617	-0.00038009	0.356495	0.0156892
			G6PI	P06744	0	0	0	1	0.192146	0	0	0	1	0.192946	0.274303	0.273892	-0.00041142	0.294058	0.486385
			G8	Q9UBA6	0	0	0	1	0.192146	0	0	0	1	0.192946	0.257717	0.257558	-0.000159	0.427711	0.410464
			GA45A	P24522	8.844e-05	9.814e-05	9.7e-06	0.0150905	0.460064	22294	23888	1594	0.0160643	0.438477	0.310567	0.310538	-2.965e-05	0.36747	0.214894
			GA45B	O75293	5.775e-05	6.281e-05	5.06e-06	0.0201005	0.493142	15136	16192	1056	0.0170854	0.483143	0.305421	0.30544	1.881e-05	0.27163	0.256009
			GA45G	O95257	0.00055796	0.00057327	1.531e-05	0.0643216	0.256228	97120	96912	-208	0.196787	0.257908	0.31566	0.315664	3.96e-06	0.298597	0.173149
			GAB1	Q13480	0.00046315	0.00046793	4.78e-06	0.47992	0.280097	111406	110772	-634	0.497467	0.2323	0.340541	0.340354	-0.00018654	0.466734	0.0556631
			GAB2	Q9UQC2	0.00044413	0.00044963	5.5e-06	0.310865	0.284133	114678	114386	-292	0.310241	0.225989	0.341986	0.342045	5.933e-05	0.206862	0.0512027
			GABPA	Q06546	9.452e-05	9.532e-05	8e-07	0.45171	0.463556	12860	12386	-474	0.0301205	0.493327	0.28851	0.288395	-0.0001141	0.495486	0.383653
			GABR1	Q9UBS5	0.00131986	0.00134383	2.397e-05	0.193548	0.117129	246112	246744	632	0.155086	0.114255	0.329906	0.330073	0.00016714	0.114573	0.0931254
			GABR2	O75899	6.879e-05	7.975e-05	1.096e-05	0.025025	0.48343	13066	14384	1318	0.0461847	0.492105	0.263018	0.263009	-8.98e-06	0.339017	0.436777
			GAK	O14976	0.00017788	0.00018188	4e-06	0.115115	0.389191	30530	30160	-370	0.167508	0.412335	0.311601	0.311437	-0.00016388	0.454454	0.207042
			GALA	P22466	0.00115423	0.00116195	7.72e-06	0.23565	0.13693	172290	170998	-1292	0.321573	0.164814	0.19363	0.193567	-6.298e-05	0.456653	0.201825
			GALR1	P47211	0	0	0	1	0.192146	0	0	0	1	0.192946	0.162227	0.162183	-4.416e-05	0.460302	0.0983552
			GALR2	O43603	0.0017306	0.00174216	1.156e-05	0.235176	0.0915466	258426	256488	-1938	0.2999	0.110335	0.240042	0.239944	-9.734e-05	0.450902	0.316087
			GALT1	Q10472	4.9e-07	4.9e-07	0	0.10241	0.209753	90	90	0	0.877387	0.206949	0.258024	0.25806	3.6e-05	0.231547	0.413966
			GASR	P32239	0.0008963	0.0009037	7.4e-06	0.316951	0.170025	136664	134818	-1846	0.238956	0.19997	0.31543	0.315461	3.133e-05	0.25677	0.174606
			GAST	P01350	5.575e-05	5.699e-05	1.24e-06	0.182817	0.483401	9264	9248	-16	0.261044	0.464927	0.268438	0.268424	-1.425e-05	0.356713	0.470267
			GATA1	P15976	0.00020372	0.0002133	9.58e-06	0.0813253	0.368497	53122	54160	1038	0.103206	0.339108	0.31962	0.319414	-0.00020645	0.417505	0.15042
			GATA2	P23769	0.00011181	0.00011591	4.1e-06	0.126379	0.44214	36956	37680	724	0.0896274	0.385239	0.319414	0.319295	-0.00011873	0.483483	0.150966
			GATA3	P23771	9.3e-07	9.5e-07	2e-08	0.168844	0.224309	116	118	2	0.213925	0.210373	0.256439	0.25555	-0.00088894	0.234406	0.397975
			GBB1	P62873	0.00198809	0.00201133	2.324e-05	0.287726	0.0786596	469682	460528	-9154	0.194165	0.0633883	0.307617	0.307486	-0.00013104	0.485456	0.239784
			GBB2	P62879	0.00188857	0.00190695	1.838e-05	0.374622	0.0838572	440836	431362	-9474	0.138138	0.0686861	0.312472	0.312256	-0.00021563	0.38833	0.199355
			GBB3	P16520	0.00019293	0.00019624	3.31e-06	0.25	0.379446	45288	45194	-94	0.296073	0.361986	0.268355	0.268319	-3.572e-05	0.396985	0.469302
			GBB4	Q9HAV0	0.00013674	0.00013797	1.23e-06	0.469469	0.422572	47020	45514	-1506	0.137688	0.361119	0.269692	0.269665	-2.71e-05	0.369587	0.479883
			GBB5	O14775	0.00124835	0.00125765	9.3e-06	0.243706	0.125209	204238	200654	-3584	0.194529	0.140051	0.251652	0.25159	-6.246e-05	0.444333	0.379379
			GBG1	P63211	9.098e-05	9.188e-05	9e-07	0.356068	0.46847	12296	12164	-132	0.301811	0.491279	0.253067	0.252995	-7.226e-05	0.486405	0.386953
			GBG10	P50151	1.019e-05	1.033e-05	1.4e-07	0.291291	0.334453	1612	1620	8	0.180905	0.313328	0.250289	0.250309	2.014e-05	0.243487	0.373125
			GBG11	P61952	0.00018889	0.00019355	4.66e-06	0.158107	0.381742	31586	31868	282	0.107754	0.404773	0.264403	0.264464	6.118e-05	0.164824	0.44516
			GBG12	Q9UBI6	0.00022266	0.00021951	-3.15e-06	0.113454	0.363868	53782	51832	-1950	0.0997984	0.344639	0.273093	0.27298	-0.00011307	0.477823	0.495621
			GBG13	Q9P2W3	0.00025481	0.00025817	3.36e-06	0.388164	0.344606	32674	32438	-236	0.435743	0.402935	0.262162	0.262068	-9.445e-05	0.478916	0.431971
			GBG2	P59768	0.00246549	0.00248714	2.165e-05	0.399598	0.0631171	533704	526060	-7644	0.273821	0.0559693	0.303415	0.303287	-0.00012843	0.48998	0.272141
			GBG3	P63215	0.00015557	0.00015736	1.79e-06	0.457661	0.407187	17926	17802	-124	0.447896	0.474516	0.254368	0.254341	-2.669e-05	0.373494	0.393204
			GBG4	P50150	0.0003367	0.00034211	5.41e-06	0.215647	0.311019	106884	106574	-310	0.329659	0.240843	0.281204	0.281255	5.076e-05	0.215292	0.435612
			GBG5	P63218	1.739e-05	1.768e-05	2.9e-07	0.254271	0.373338	6050	6036	-14	0.358434	0.41988	0.24973	0.249728	-1.8e-06	0.321285	0.37048
			GBG7	O60262	7.009e-05	7.138e-05	1.29e-06	0.188755	0.495148	13136	13154	18	0.196177	0.49967	0.25136	0.251369	9.14e-06	0.281974	0.37837
			GBG8	Q9UK08	0	0	0	1	0.192146	0	0	0	1	0.192946	0.249514	0.249511	-3.24e-06	0.336024	0.368996
			GBGT2	O14610	0	0	0	1	0.192146	0	0	0	1	0.192946	0.249514	0.249511	-3.24e-06	0.335005	0.368996
GBLP			GBLP	P63244	0.00678689	0.0069848	0.00019791	0.089	0.0217293	1595894	1601532	5638	0.114458	0.0162872	0.377451	0.377371	-8.008e-05	0.421421	0.00602387
			GBP2	P32456	2.047e-05	2.082e-05	3.5e-07	0.295888	0.392018	3086	3098	12	0.276104	0.364224	0.26246	0.262428	-3.266e-05	0.379379	0.433468
			GBP3	Q9H0R5	0	0	0	1	0.192146	0	0	0	1	0.192946	0.239842	0.239894	5.188e-05	0.182548	0.315747
			GBP7	Q8N8V2	7.6e-07	7.8e-07	2e-08	0.239196	0.220231	278	276	-2	0.326653	0.231321	0.252202	0.252161	-4.059e-05	0.39598	0.38277
			GBRA1	P14867	0.00072041	0.00073323	1.282e-05	0.100705	0.201138	158466	159256	790	0.100402	0.173827	0.282419	0.282478	5.935e-05	0.21005	0.425397
			GBRA2	P47869	1.47e-05	1.49e-05	2e-07	0.542084	0.359227	4314	4304	-10	0.342342	0.392771	0.243192	0.243113	-7.86e-05	0.497	0.331825
			GBRA3	P34903	0.00041796	0.00042323	5.27e-06	0.269076	0.289523	62214	62372	158	0.144869	0.319561	0.283366	0.283362	-3.9e-06	0.333333	0.417029
			GBRA4	P48169	3.315e-05	3.379e-05	6.4e-07	0.191	0.431406	8812	8950	138	0.0903614	0.4615	0.254536	0.254586	4.969e-05	0.183653	0.394081
			GBRA6	Q16445	0	0	0	1	0.192146	0	0	0	1	0.192946	0.240725	0.240649	-7.649e-05	0.478916	0.320486
			GBRB1	P18505	0.00035247	0.00034402	-8.45e-06	0.0471414	0.310606	60544	57570	-2974	0.0380762	0.332433	0.27277	0.272202	-0.00056776	0.286432	0.498523
			GBRB2	P47870	0.00046265	0.0004801	1.745e-05	0.0942828	0.276845	105646	108458	2812	0.135	0.237068	0.273287	0.273305	1.821e-05	0.28169	0.491937
			GBRB3	P28472	0.00111254	0.00111077	-1.77e-06	0.0704935	0.143679	181876	177346	-4530	0.0791583	0.158001	0.303681	0.303554	-0.00012687	0.478873	0.270715
			GBRG1	Q8N1C3	0	0	0	1	0.192146	0	0	0	1	0.192946	0.232879	0.232772	-0.00010652	0.461694	0.284597
			GBRG2	P18507	0.00060839	0.00061904	1.065e-05	0.12337	0.230969	131034	131578	544	0.131131	0.204621	0.288054	0.288106	5.193e-05	0.21407	0.38536
			GBRG3	Q99928	0	0	0	1	0.192146	0	0	0	1	0.192946	0.240725	0.240649	-7.649e-05	0.478916	0.320486
			GBRR1	P24046	0.00176471	0.00177803	1.332e-05	0.137374	0.0886252	197932	193168	-4764	0.0582915	0.145205	0.312528	0.312596	6.83e-05	0.214286	0.195083
			GBRR2	P28476	5.1e-06	5.27e-06	1.7e-07	0.237713	0.298253	1962	2012	50	0.158426	0.328569	0.298681	0.298681	-1.4e-07	0.327655	0.303844
			GBRT	Q9UN88	0	0	0	1	0.192146	0	0	0	1	0.192946	0.232879	0.232772	-0.00010652	0.461307	0.284597
			GCA14	Q9H7U1	6.6e-07	6.7e-07	1e-08	0.312939	0.217246	102	100	-2	0.12337	0.207866	0.246567	0.246562	-4.97e-06	0.347	0.34888
			GCF	P16383	1.81e-06	1.84e-06	3e-08	0.492477	0.244205	1120	1120	0	0.665327	0.290004	0.291201	0.291251	4.969e-05	0.220425	0.362731
			GCH1	P30793	3.17e-06	3.21e-06	4e-08	0.537223	0.266363	1174	1160	-14	0.175527	0.293079	0.286269	0.285904	-0.00036486	0.302115	0.398055
GCR			GCR	P04150	0.00408158	0.00404639	-3.519e-05	0.151911	0.0398241	876108	826374	-49734	0.0462312	0.0362192	0.358696	0.356906	-0.0017898	0.234642	0.0257949
			GDE1	Q9NZC3	3.7e-07	3.8e-07	1e-08	0.184	0.203508	70	70	0	0.83871	0.201479	0.252073	0.251995	-7.831e-05	0.486459	0.382025
			GDF11	O95390	0	0	0	1	0.192146	0	0	0	1	0.192946	0.256705	0.25654	-0.00016449	0.406219	0.405434
			GDF5	P43026	1.947e-05	1.989e-05	4.2e-07	0.258517	0.38738	3718	3760	42	0.141709	0.380116	0.258911	0.258875	-3.571e-05	0.388164	0.417506
			GDF6	Q6KF10	9.23e-06	9.44e-06	2.1e-07	0.263052	0.329367	1770	1790	20	0.205438	0.319619	0.263058	0.263069	1.14e-05	0.26506	0.43706
			GDF7	Q7Z4P5	0	0	0	1	0.192146	0	0	0	1	0.192946	0.208974	0.208758	-0.00021625	0.32998	0.233652
			GDIB	P50395	0.00015196	0.00015525	3.29e-06	0.274372	0.409043	43036	43434	398	0.133668	0.367967	0.301278	0.301401	0.0001229	0.136409	0.285551
			GDIR1	P52565	0.00040522	0.00041725	1.203e-05	0.11523	0.290802	86696	86868	172	0.209045	0.279062	0.322266	0.322013	-0.00025235	0.395582	0.135062
			GDIR2	P52566	4.55e-05	4.583e-05	3.3e-07	0.306613	0.461165	11456	11380	-76	0.438755	0.485417	0.301908	0.301824	-8.424e-05	0.44668	0.282095
			GDN	P07093	1.507e-05	1.538e-05	3.1e-07	0.262262	0.361933	1686	1648	-38	0.138833	0.314393	0.240025	0.239877	-0.0001476	0.433166	0.315652
			GDNF	P39905	3.3e-07	3.3e-07	0	0.504523	0.201937	172	172	0	0.732125	0.219712	0.256192	0.256196	4.26e-06	0.296781	0.402374
			GELS	P06396	0.00194361	0.0019829	3.929e-05	0.202417	0.0802314	385076	386732	1656	0.144289	0.0753989	0.353463	0.353352	-0.00011142	0.48497	0.0302878
			GEMI2	O14893	0.00060392	0.00061523	1.131e-05	0.186935	0.232778	148326	146258	-2068	0.231695	0.187915	0.308713	0.308644	-6.928e-05	0.394153	0.231281
			GEMI4	P57678	0.001845	0.00184427	-7.3e-07	0.18794	0.086277	398364	382474	-15890	0.086781	0.0766416	0.326271	0.325639	-0.00063259	0.283133	0.114532
			GEMI5	Q8TEQ6	1.091e-05	1.114e-05	2.3e-07	0.256281	0.338345	1888	1902	14	0.216516	0.325177	0.27153	0.271344	-0.00018633	0.395582	0.492452
			GEMI7	Q9H840	1.477e-05	1.516e-05	3.9e-07	0.201403	0.360581	3288	3284	-4	0.471414	0.369715	0.276757	0.276377	-0.00038012	0.311871	0.47076
			GFPT1	Q06210	6.17e-06	6.37e-06	2e-07	0.296296	0.308282	2980	3056	76	0.156313	0.363143	0.286909	0.286977	6.782e-05	0.18191	0.391742
			GFRA1	P56159	3.3e-07	3.3e-07	0	0.50503	0.201937	172	172	0	0.730924	0.219712	0.256192	0.256196	4.26e-06	0.295181	0.402374
			GGA2	Q9UJY4	0.00017521	0.00017597	7.6e-07	0.162978	0.393693	25378	24540	-838	0.0822467	0.435653	0.287815	0.287336	-0.00047843	0.331325	0.389686
			GHC1	Q9H936	3.8e-06	3.74e-06	-6e-08	0.0685484	0.276918	472	478	6	0.23023	0.249463	0.264201	0.263735	-0.00046672	0.279116	0.440097
			GHR	P10912	0.00085471	0.00086164	6.93e-06	0.429719	0.176899	183348	180886	-2462	0.220322	0.154339	0.328467	0.328372	-9.47e-05	0.424975	0.100572
			GHRHR	Q02643	0.0005772	0.00058106	3.86e-06	0.237713	0.248498	66702	63514	-3188	0.0292339	0.317484	0.188213	0.188067	-0.00014605	0.348394	0.179428
			GHRL	Q9UBU3	0.00301823	0.00305186	3.363e-05	0.101815	0.0517979	340168	328638	-11530	0.0773869	0.0885099	0.231773	0.231551	-0.00022196	0.35	0.280562
			GHSR	Q92847	3.266e-05	3.311e-05	4.5e-07	0.292	0.429582	1772	1772	0	0.561368	0.319059	0.198283	0.198203	-7.987e-05	0.411647	0.214065
			GIP	P09681	0	0	0	1	0.192146	0	0	0	1	0.192946	0.164514	0.164351	-0.00016343	0.304523	0.105038
			GIPR	P48546	0.0005772	0.00058106	3.86e-06	0.238911	0.248498	70446	67276	-3170	0.043043	0.310476	0.196897	0.196663	-0.00023413	0.300201	0.210254
			GIT1	Q9Y2X7	0.00097077	0.00099791	2.714e-05	0.145582	0.155584	188318	189578	1260	0.151759	0.14742	0.331104	0.331057	-4.664e-05	0.401204	0.0893691
			GIT2	Q14161	2.258e-05	2.319e-05	6.1e-07	0.209	0.402201	8550	8674	124	0.132323	0.458155	0.304991	0.305088	9.699e-05	0.136089	0.258772
			GLHA	P01215	0.00013776	0.00013916	1.4e-06	0.471831	0.421593	18282	18204	-78	0.386386	0.471531	0.25957	0.259539	-3.148e-05	0.423541	0.419193
			GLI1	P08151	2.142e-05	2.202e-05	6e-07	0.112337	0.39797	3798	3846	48	0.129648	0.383598	0.236148	0.236158	9.77e-06	0.283702	0.297861
			GLI2	P10070	0.00010408	0.00010638	2.3e-06	0.0800405	0.453356	20296	19004	-1292	0.0311245	0.466646	0.26254	0.261769	-0.00077082	0.244444	0.431104
			GLI3	P10071	0.00121317	0.00124037	2.72e-05	0.0341023	0.126581	243880	243070	-810	0.15493	0.11606	0.293793	0.293711	-8.238e-05	0.449348	0.346167
			GLP1R	P43220	0.00046699	0.00047735	1.036e-05	0.0961924	0.27756	64514	61650	-2864	0.0392354	0.321294	0.287552	0.287001	-0.00055112	0.27163	0.391605
			GLP2R	O95838	0.00018034	0.0001761	-4.24e-06	0.0493952	0.393567	28874	25872	-3002	0.0210843	0.429719	0.268813	0.267818	-0.00099479	0.235944	0.465613
			GLPC	P04921	0	0	0	1	0.192146	0	0	0	1	0.192946	0.238079	0.237822	-0.00025673	0.301108	0.305385
			GLR	P47871	0.00014254	0.00014861	6.07e-06	0.0453629	0.414727	11400	11394	-6	0.345804	0.485576	0.244894	0.244808	-8.566e-05	0.496482	0.340414
			GLTL2	Q8N3T1	0	0	0	1	0.192146	0	0	0	1	0.192946	0.252846	0.252884	3.782e-05	0.211847	0.386313
			GLU2B	P14314	8.861e-05	9.276e-05	4.15e-06	0.121608	0.467167	20266	20706	440	0.120968	0.454446	0.307781	0.307541	-0.00024003	0.354481	0.239398
			GLUC	P01275	0.00121519	0.00122177	6.58e-06	0.126888	0.129139	146652	140088	-6564	0.0150602	0.194566	0.245119	0.244756	-0.00036311	0.298298	0.340127
			GLYC	P34896	0	0	0	1	0.192146	0	0	0	1	0.192946	0.23455	0.234469	-8.086e-05	0.453078	0.290485
			GMIP	Q9P107	0	0	0	1	0.192146	0	0	0	1	0.192946	0.255606	0.25555	-5.659e-05	0.448898	0.397975
			GNA11	P29992	0.00071986	0.00072582	5.96e-06	0.406439	0.203136	112140	111304	-836	0.426559	0.231178	0.300442	0.300323	-0.00011938	0.491952	0.29381
			GNA12	Q03113	0.00254514	0.00257422	2.908e-05	0.274549	0.0613159	508126	502312	-5814	0.308853	0.0590551	0.32828	0.328091	-0.0001897	0.423116	0.101929
			GNA13	Q14344	0.00280511	0.00283624	3.113e-05	0.326981	0.057424	539472	534158	-5314	0.386158	0.055075	0.325199	0.324901	-0.00029855	0.344064	0.118406
			GNA14	O95837	0.00014131	0.00014034	-9.7e-07	0.11011	0.420326	18952	18936	-16	0.282828	0.467058	0.261529	0.261015	-0.00051453	0.271357	0.426282
			GNA15	P30679	0.00153296	0.0015386	5.64e-06	0.144289	0.102356	239702	237076	-2626	0.354125	0.118778	0.292677	0.292265	-0.00041217	0.309619	0.356002
GNAI1			GNAI1	P63096	0.00624983	0.00630927	5.944e-05	0.324297	0.0251142	1126838	1113250	-13588	0.341023	0.0273388	0.316786	0.316564	-0.00022155	0.424699	0.166733
GNAI3			GNAI3	P08754	0.00421675	0.00436009	0.00014334	0.0594159	0.035337	640890	657470	16580	0.0391566	0.0448396	0.319178	0.318999	-0.00017926	0.461384	0.152355
			GNAO	P09471	0.00165798	0.00168027	2.229e-05	0.145436	0.0942415	329396	328664	-732	0.108081	0.0885026	0.296027	0.295984	-4.316e-05	0.390121	0.324342
GNAQ			GNAQ	P50148	0.00707965	0.00714675	6.71e-05	0.263527	0.0208636	1178874	1170590	-8284	0.341365	0.0265075	0.31566	0.31549	-0.00016964	0.451354	0.174399
			GNAS1	Q5JWF2	0.00145447	0.00147228	1.781e-05	0.232465	0.106703	242918	240482	-2436	0.364458	0.117233	0.293321	0.293186	-0.00013523	0.476382	0.349857
			GNAS2	P63092	0.00016979	0.0001725	2.71e-06	0.245245	0.39662	29904	29578	-326	0.27984	0.414736	0.259959	0.25995	-9.34e-06	0.359799	0.420886
			GNDS	Q12967	0.00028996	0.00029472	4.76e-06	0.305221	0.329735	51536	51490	-46	0.314629	0.345629	0.309818	0.30995	0.00013287	0.115927	0.219435
			GNL3L	Q9NVN8	0	0	0	1	0.192146	0	0	0	1	0.192946	0.223563	0.223521	-4.18e-05	0.401408	0.259241
			GNRHR	P30968	0.0005772	0.00058106	3.86e-06	0.236181	0.248498	92132	91704	-428	0.161972	0.268039	0.223779	0.223463	-0.00031643	0.284708	0.258977
			GOGA5	Q8TBA6	0	0	0	1	0.192146	0	0	0	1	0.192946	0.236907	0.236677	-0.00022944	0.307307	0.299884
			GOGB1	Q14789	0.00061792	0.00062261	4.69e-06	0.21608	0.229278	96322	93950	-2372	0.120482	0.263675	0.26035	0.260363	1.295e-05	0.283567	0.423293
			GON1	P01148	0	0	0	1	0.192146	0	0	0	1	0.192946	0.182869	0.182658	-0.00021129	0.289447	0.162296
			GP124	Q96PE1	0	0	0	1	0.192146	0	0	0	1	0.192946	0.248085	0.247911	-0.00017351	0.352764	0.35647
			GP125	Q8IWK6	0	0	0	1	0.192146	0	0	0	1	0.192946	0.248085	0.247911	-0.00017351	0.35241	0.35647
			GP143	P51810	0.0005772	0.00058106	3.86e-06	0.238911	0.248498	82566	81020	-1546	0.222782	0.288594	0.240625	0.240497	-0.00012752	0.418182	0.319678
			GP151	Q8TDV0	0	0	0	1	0.192146	0	0	0	1	0.192946	0.162227	0.162183	-4.416e-05	0.460222	0.0983552
			GP1BA	P07359	0.00065201	0.00067003	1.802e-05	0.0705645	0.216425	91792	91790	-2	0.151911	0.267828	0.301724	0.301586	-0.00013823	0.477956	0.284048
			GP1BB	P13224	5.87e-05	5.915e-05	4.5e-07	0.368104	0.487094	8934	8624	-310	0.0645161	0.45744	0.293619	0.293386	-0.00023357	0.356068	0.348466
			GPDA	P21695	0	0	0	1	0.192146	0	0	0	1	0.192946	0.21961	0.219222	-0.00038787	0.266533	0.253873
			GPDM	P43304	0	0	0	1	0.192146	0	0	0	1	0.192946	0.233349	0.233229	-0.00011962	0.411883	0.286141
			GPIX	P14770	1.886e-05	1.924e-05	3.8e-07	0.2249	0.383741	3042	3048	6	0.214718	0.362917	0.272878	0.272915	3.706e-05	0.248741	0.496331
			GPNMB	Q14956	0	0	0	1	0.192146	0	0	0	1	0.192946	0.265864	0.26575	-0.00011312	0.488956	0.450595
			GPR1	P46091	0	0	0	1	0.192146	0	0	0	1	0.192946	0.240592	0.240464	-0.0001277	0.421421	0.319554
			GPR17	Q13304	0	0	0	1	0.192146	0	0	0	1	0.192946	0.245414	0.245244	-0.00016995	0.346038	0.342323
			GPR26	Q8NDV2	0	0	0	1	0.192146	0	0	0	1	0.192946	0.203608	0.20228	-0.00132773	0.237475	0.223641
			GPR45	Q9Y5Y3	1.34e-06	1.37e-06	3e-08	0.533066	0.234039	2252	2252	0	0.567568	0.337654	0.310623	0.310678	5.482e-05	0.211635	0.213304
			GPR63	Q9BZJ6	0	0	0	1	0.192146	0	0	0	1	0.192946	0.277444	0.277446	2.25e-06	0.298492	0.463006
			GPSM2	P81274	4.578e-05	4.627e-05	4.9e-07	0.33434	0.462128	9312	9310	-2	0.410822	0.465741	0.283135	0.282943	-0.00019163	0.391784	0.420906
			GPV	P40197	4.763e-05	4.85e-05	8.7e-07	0.295065	0.466032	9726	9684	-42	0.395582	0.471151	0.285985	0.28607	8.501e-05	0.153769	0.396988
			GRAA	P12544	9.736e-05	0.00010043	3.07e-06	0.0883534	0.457908	31826	32040	214	0.114804	0.404271	0.300052	0.300009	-4.324e-05	0.38995	0.295492
			GRAB	P10144	0.00059465	0.00060063	5.98e-06	0.462626	0.238043	89428	87540	-1888	0.106855	0.277602	0.302673	0.30246	-0.0002125	0.396586	0.277623
			GRAN	P28676	1.56e-05	1.612e-05	5.2e-07	0.125502	0.366125	1906	2002	96	0.060241	0.328095	0.253921	0.253872	-4.831e-05	0.428141	0.390461
			GRAP	Q13588	2.037e-05	2.056e-05	1.9e-07	0.260521	0.390421	6692	6604	-88	0.227227	0.430131	0.310373	0.310258	-0.00011483	0.475904	0.217475
			GRAP2	O75791	0.00017136	0.00016376	-7.6e-06	0.0561685	0.401817	35482	34320	-1162	0.157157	0.397056	0.310595	0.31051	-8.55e-05	0.421529	0.215146
			GRB10	Q13322	0.00021357	0.00021714	3.57e-06	0.358434	0.365409	79656	79478	-178	0.412714	0.291218	0.343443	0.343479	3.534e-05	0.263425	0.047939
			GRB14	Q14449	5.394e-05	5.502e-05	1.08e-06	0.292757	0.479955	15184	15178	-6	0.386546	0.487843	0.311041	0.310846	-0.00019509	0.40402	0.211762
			GRB7	Q14451	5.128e-05	5.179e-05	5.1e-07	0.306841	0.474396	21178	20944	-234	0.240161	0.453121	0.326887	0.326658	-0.00022835	0.38995	0.108735
			GRIA1	P42261	0.00078734	0.00079666	9.32e-06	0.489447	0.186608	118220	116970	-1250	0.25328	0.221791	0.314542	0.314281	-0.00026198	0.358871	0.182574
			GRIA2	P42262	0.00033842	0.00034328	4.86e-06	0.276553	0.31073	51376	51170	-206	0.367306	0.346609	0.296306	0.296366	6.065e-05	0.206237	0.321025
			GRIA3	P42263	5.227e-05	5.319e-05	9.2e-07	0.380665	0.476379	8008	8022	14	0.313883	0.449729	0.280181	0.280202	2.076e-05	0.279559	0.44407
			GRIA4	P48058	0.00013135	0.00013439	3.04e-06	0.216867	0.426103	26608	26854	246	0.158266	0.424836	0.301226	0.301006	-0.00022009	0.39839	0.288792
			GRID2	O43424	3.605e-05	3.651e-05	4.6e-07	0.393393	0.439149	6172	6128	-44	0.363089	0.42134	0.262779	0.262788	9.51e-06	0.294177	0.435747
			GRIK1	P39086	1.391e-05	1.399e-05	8e-08	0.164824	0.353349	3902	3876	-26	0.310241	0.384768	0.279797	0.279792	-4.61e-06	0.360161	0.447657
			GRIK2	Q13002	0.00089329	0.00089999	6.7e-06	0.473948	0.171013	132054	130690	-1364	0.37751	0.206234	0.292479	0.292389	-9.039e-05	0.465863	0.355198
			GRIK3	Q13003	8.253e-05	8.324e-05	7.1e-07	0.415075	0.478677	14258	14080	-178	0.216298	0.493814	0.279977	0.279974	-3.41e-06	0.356137	0.445925
			GRIK4	Q16099	0	0	0	1	0.192146	0	0	0	1	0.192946	0.226308	0.226254	-5.402e-05	0.466	0.266269
			GRIK5	Q16478	7.66e-06	7.76e-06	1e-07	0.546828	0.317188	996	990	-6	0.41984	0.28449	0.246146	0.246191	4.506e-05	0.212487	0.345825
			GRIN1	Q7Z2K8	0	0	0	1	0.192146	0	0	0	1	0.192946	0.276956	0.276933	-2.33e-05	0.369478	0.466333
			GRIP1	Q9Y3R0	0.00175673	0.00177351	1.678e-05	0.241449	0.0892726	325840	314812	-11028	0.100402	0.0927877	0.302938	0.30278	-0.00015785	0.467271	0.275288
			GRIPE	Q6GYQ0	0	0	0	1	0.192146	0	0	0	1	0.192946	0.248565	0.248538	-2.748e-05	0.381381	0.361052
			GRK4	P32298	2.333e-05	2.305e-05	-2.8e-07	0.0899899	0.401783	3302	3132	-170	0.0463243	0.365026	0.273416	0.272526	-0.00089019	0.257805	0.499428
			GRK5	P34947	0.00083418	0.00083166	-2.52e-06	0.0732197	0.181716	139820	137000	-2820	0.127255	0.197634	0.298475	0.297725	-0.00075021	0.258517	0.312657
			GRK6	P43250	0.00031362	0.00031566	2.04e-06	0.289157	0.322741	52026	51498	-528	0.387097	0.345601	0.282649	0.282386	-0.00026372	0.364458	0.426265
			GRLF1	Q9NRY4	8.293e-05	9.655e-05	1.362e-05	0.0110775	0.461787	22592	24792	2200	0.0201005	0.434266	0.315948	0.316041	9.293e-05	0.163984	0.170064
			GRM1	Q13255	8.406e-05	8.544e-05	1.38e-06	0.30202	0.475467	17034	16770	-264	0.125755	0.480498	0.304723	0.304548	-0.00017467	0.439196	0.263289
			GRM2	Q14416	5.16e-06	5.25e-06	9e-08	0.307847	0.298081	836	842	6	0.223232	0.277119	0.251178	0.251131	-4.707e-05	0.441884	0.377113
			GRM3	Q14832	8.54e-06	8.66e-06	1.2e-07	0.543719	0.323577	1454	1454	0	0.591775	0.307613	0.25812	0.25804	-7.946e-05	0.493441	0.413875
			GRM4	Q14833	2.489e-05	2.51e-05	2.1e-07	0.344724	0.407786	7598	7558	-40	0.360524	0.444788	0.279977	0.279883	-9.447e-05	0.462777	0.44675
			GRM5	P41594	0.00022009	0.00022867	8.58e-06	0.0843373	0.358872	43986	45036	1050	0.0994975	0.362509	0.310734	0.310594	-0.0001407	0.482482	0.214219
			GRM6	O15303	0	0	0	1	0.192146	0	0	0	1	0.192946	0.228426	0.228401	-2.56e-05	0.387487	0.271494
			GRM7	Q14831	8.231e-05	8.344e-05	1.13e-06	0.465327	0.478397	26696	26566	-130	0.41984	0.426169	0.308439	0.308257	-0.00018146	0.407669	0.23479
			GRM8	O00222	2.01e-06	2.05e-06	4e-08	0.403015	0.249211	540	536	-4	0.246976	0.254337	0.284787	0.284769	-1.796e-05	0.373615	0.407507
			GRN	P28799	0.00092666	0.00083588	-9.078e-05	0.0201207	0.181271	109046	98092	-10954	0.0080402	0.256157	0.285044	0.2819	-0.00314434	0.224121	0.430108
			GROA	P09341	2.73e-05	4.306e-05	1.576e-05	0.00100705	0.455923	6020	9192	3172	0.00807265	0.464235	0.2435	0.243251	-0.00024877	0.332659	0.332765
			GRP1	O95267	2.67e-06	2.75e-06	8e-08	0.177062	0.259518	416	420	4	0.125502	0.244528	0.263178	0.26319	1.221e-05	0.323293	0.437548
			GRP3	Q8IV61	1.966e-05	2.023e-05	5.7e-07	0.209045	0.38891	6448	6550	102	0.145291	0.42932	0.300938	0.300795	-0.00014274	0.470825	0.290468
			GRP4	Q8TDF6	4.9e-07	5e-07	1e-08	0.288306	0.210674	172	178	6	0.0874372	0.220969	0.263418	0.263452	3.4e-05	0.234704	0.438752
			GRP75	P38646	0.00211194	0.00200893	-0.00010301	0.039196	0.0787576	643124	565894	-77230	0.0160643	0.0520461	0.356702	0.353897	-0.0028049	0.22334	0.0294256
GRP78			GRP78	P11021	0.00677833	0.0065506	-0.00022773	0.063253	0.0239888	1446860	1303206	-143654	0.00502008	0.02365	0.375162	0.372591	-0.00257094	0.227593	0.00989985
			GRPE2	Q8TAA5	0	0	0	1	0.192146	0	0	0	1	0.192946	0.247429	0.245401	-0.00202791	0.221443	0.342956
			GSK3A	P49840	0.00014776	0.00015426	6.5e-06	0.109328	0.409977	47542	48430	888	0.106319	0.352913	0.327319	0.327186	-0.00013279	0.479397	0.105129
GSK3B			GSK3B	P49841	0.00513083	0.00520077	6.994e-05	0.270352	0.0299671	1021208	1007384	-13824	0.0952859	0.0293752	0.356812	0.356315	-0.00049716	0.316583	0.0265324
			GSLG1	Q92896	2.065e-05	0	-2.065e-05	0.00705645	0.192146	4880	0	-4880	0.00601805	0.192946	0.30596	0.296955	-0.00900573	0.207831	0.317992
			GSTM4	Q03013	7.24e-05	8.42e-05	1.18e-05	0.0191532	0.477372	11926	12144	218	0.124124	0.491144	0.290031	0.289828	-0.00020275	0.390782	0.37489
			GSTP1	P09211	2.797e-05	2.857e-05	6e-07	0.319639	0.41674	13494	13544	50	0.288153	0.496711	0.3125	0.312426	-7.375e-05	0.452811	0.197143
			GSUB	O96001	0	0	0	1	0.192146	0	0	0	1	0.192946	0.269587	0.268257	-0.0013303	0.226815	0.468849
			GTF2I	P78347	0.00134835	0.00132139	-2.696e-05	0.0740741	0.118442	319688	281760	-37928	0.0160321	0.102625	0.342324	0.339951	-0.00237303	0.222111	0.0568332
			GTPB3	Q969Y2	0.0005772	0.00058106	3.86e-06	0.234879	0.248498	71078	70116	-962	0.318637	0.307269	0.236035	0.23598	-5.571e-05	0.466801	0.296781
			GTR1	P11166	0.00013887	0.00014033	1.46e-06	0.375125	0.420337	29656	29468	-188	0.39799	0.415175	0.301567	0.301507	-5.992e-05	0.398594	0.28468
			GTR4	P14672	0.00167874	0.00169148	1.274e-05	0.429288	0.093873	275650	270984	-4666	0.163819	0.105451	0.309513	0.309254	-0.00025891	0.386478	0.225318
			GYS1	P13807	6.348e-05	6.751e-05	4.03e-06	0.0471888	0.499383	12198	12956	758	0.0493952	0.498202	0.297374	0.297314	-6.02e-05	0.43487	0.315888
			H12	P16403	2.23e-06	0	-2.23e-06	0.00704225	0.192146	2330	0	-2330	0.00901804	0.192946	0.294793	0.281209	-0.0135841	0.210898	0.436112
			H2A1A	Q96QV6	0	0	0	1	0.192146	0	0	0	1	0.192946	0.261667	0.26161	-5.763e-05	0.450251	0.430282
			H2A2B	Q8IUE6	0	0	0	1	0.192146	0	0	0	1	0.192946	0.28125	0.281209	-4.085e-05	0.373869	0.436112
			H2A2C	Q16777	1.26e-05	1.297e-05	3.7e-07	0.208835	0.348832	2386	2420	34	0.177419	0.343428	0.289691	0.289657	-3.401e-05	0.381526	0.375723
			H2A3	Q7L7L0	4.31e-06	4.35e-06	4e-08	0.282282	0.286238	628	594	-34	0.0511535	0.259096	0.248031	0.24635	-0.00168166	0.225677	0.347142
			H2AB1	P0C5Y9	0	0	0	1	0.192146	0	0	0	1	0.192946	0.267031	0.267049	1.798e-05	0.283852	0.461256
			H2AX	P16104	0.00076718	0.00078322	1.604e-05	0.080402	0.189154	134432	132488	-1944	0.169014	0.203246	0.32459	0.324533	-5.688e-05	0.402402	0.120351
			H2AY	O75367	4.3e-07	4.4e-07	1e-08	0.163819	0.206531	200	200	0	0.787879	0.222848	0.274651	0.27446	-0.00019147	0.405025	0.482664
			H2AZ	P0C0S5	0	0	0	1	0.192146	0	0	0	1	0.192946	0.290274	0.290072	-0.00020146	0.381764	0.373229
			H2B1A	Q96A08	6.97e-06	7.09e-06	1.2e-07	0.306921	0.313331	1244	1244	0	0.38995	0.29594	0.268168	0.268152	-1.603e-05	0.39039	0.467993
			H2B1B	P33778	6.07e-06	2.67e-06	-3.4e-06	0.00801603	0.258361	996	504	-492	0.247495	0.25149	0.281593	0.275008	-0.00658486	0.212851	0.479483
			H2B1D	P58876	0	0	0	1	0.192146	0	0	0	1	0.192946	0.215713	0.215691	-2.194e-05	0.375375	0.247277
			H2B1H	Q93079	0	0	0	1	0.192146	0	0	0	1	0.192946	0.294043	0.294037	-5.52e-06	0.288288	0.342271
			H2B1K	O60814	0	0	0	1	0.192146	0	0	0	1	0.192946	0.215713	0.215691	-2.194e-05	0.378894	0.247277
			H2B1L	Q99880	0	0	0	1	0.192146	0	0	0	1	0.192946	0.268605	0.268298	-0.00030626	0.314834	0.469163
			H2B1N	Q99877	0	0	0	1	0.192146	0	0	0	1	0.192946	0.221732	0.221707	-2.47e-05	0.39397	0.256266
			H2B1O	P23527	0	0	0	1	0.192146	0	0	0	1	0.192946	0.28125	0.281209	-4.085e-05	0.372372	0.436112
			H2B2E	Q16778	0.00117781	0.00120068	2.287e-05	0.149448	0.130867	220572	219470	-1102	0.307229	0.126349	0.321309	0.321232	-7.743e-05	0.429435	0.139464
			H2B2F	Q5QNW6	0	0	0	1	0.192146	0	0	0	1	0.192946	0.282465	0.282594	0.00012927	0.0931864	0.424214
			H2B3B	Q8N257	4.6e-07	4.8e-07	2e-08	0.104628	0.209366	102	102	0	0.929789	0.20846	0.245814	0.243992	-0.00182208	0.222558	0.336266
			H31	P68431	0.00019713	0.00021357	1.644e-05	0.0342052	0.368374	34698	36152	1454	0.0390782	0.389819	0.313773	0.313536	-0.00023727	0.368474	0.188066
			H31T	Q16695	0.00226144	0.00229665	3.521e-05	0.164329	0.0679495	379378	376804	-2574	0.386707	0.0777158	0.321429	0.321142	-0.00028657	0.37	0.140235
			H32	Q71DI3	7.14e-06	7.77e-06	6.3e-07	0.0472837	0.317278	1858	1920	62	0.0742972	0.325819	0.278963	0.27875	-0.00021345	0.4	0.454467
			H33	P84243	0.00061353	0.00064661	3.308e-05	0.0452261	0.221426	111740	113652	1912	0.0918264	0.227481	0.311041	0.311015	-2.656e-05	0.325605	0.21034
			H4	P62805	0.0022226	0.00227774	5.514e-05	0.0462312	0.0684991	388866	392430	3564	0.0422111	0.0744591	0.343239	0.343273	3.393e-05	0.266533	0.0484631
			HA23	P01909	9.17e-06	9.18e-06	1e-08	0.153769	0.327374	1348	1366	18	0.171515	0.3033	0.260781	0.259109	-0.00167251	0.231621	0.418194
			HA26	P01906	4.37e-06	4.45e-06	8e-08	0.342397	0.287591	758	754	-4	0.490452	0.269733	0.262699	0.262468	-0.00023142	0.354481	0.433659
			HA2Q	P20036	0.0005772	0.00058106	3.86e-06	0.238716	0.248498	106296	102420	-3876	0.0552764	0.248601	0.260331	0.260088	-0.00024293	0.332323	0.421389
			HAND2	P61296	3.42e-05	3.708e-05	2.88e-06	0.0392749	0.440313	12290	13286	996	0.0541625	0.498559	0.313008	0.313051	4.326e-05	0.246246	0.191621
			HAS1	Q92839	1.93e-06	2.02e-06	9e-08	0.137827	0.248501	888	910	22	0.0822467	0.280904	0.263558	0.263573	1.478e-05	0.295591	0.439332
			HAT1	O14929	2.99e-06	3.05e-06	6e-08	0.28169	0.262739	1112	1116	4	0.313448	0.289621	0.286672	0.286833	0.0001617	0.0844221	0.392515
			HB24	P01920	0	0	0	1	0.192146	0	0	0	1	0.192946	0.260291	0.260048	-0.00024312	0.333333	0.421244
			HB2B	P01912	4.63e-06	4.66e-06	3e-08	0.263052	0.289646	782	780	-2	0.506036	0.271118	0.230202	0.230188	-1.405e-05	0.375	0.276822
			HB2P	P04440	0	0	0	1	0.192146	0	0	0	1	0.192946	0.20657	0.206417	-0.0001529	0.339357	0.23015
			HBB	P68871	1.784e-05	1.806e-05	2.2e-07	0.497492	0.375258	1854	1828	-26	0.23671	0.32117	0.234502	0.234357	-0.00014498	0.383534	0.290086
			HBEGF	Q99075	7.478e-05	7.589e-05	1.11e-06	0.47342	0.489393	16402	16652	250	0.135815	0.480926	0.303442	0.303153	-0.00028856	0.337349	0.272832
			HBG2	P69892	3.865e-05	3.948e-05	8.3e-07	0.166333	0.446704	3424	3474	50	0.0762287	0.373406	0.237834	0.237773	-6.089e-05	0.446231	0.305052
			HBXIP	O43504	8.85e-06	9.32e-06	4.7e-07	0.0924623	0.32825	3286	3294	8	0.391608	0.370049	0.295497	0.295324	-0.00017329	0.447686	0.328749
			HCD2	Q99714	0	0	0	1	0.192146	0	0	0	1	0.192946	0.266456	0.266347	-0.00010965	0.462851	0.454916
			HCDH	Q16836	0	0	0	1	0.192146	0	0	0	1	0.192946	0.236374	0.236223	-0.00015093	0.39196	0.298138
			HCK	P08631	0.00221378	0.00228225	6.847e-05	0.0806452	0.0682971	445936	450456	4520	0.0864322	0.0649702	0.338082	0.337848	-0.00023331	0.432866	0.0643932
			HCLS1	P14317	0.00055333	0.00055971	6.38e-06	0.273737	0.259068	105312	104574	-738	0.490433	0.244133	0.314714	0.314712	-2.37e-06	0.329648	0.179944
			HCN2	Q9UL51	8.8e-07	8.9e-07	1e-08	0.481855	0.222504	1628	1628	0	0.631526	0.313707	0.317802	0.317909	0.00010649	0.150451	0.158723
			HCST	Q9UBK5	0	0	0	1	0.192146	0	0	0	1	0.192946	0.177829	0.177826	-3.1e-06	0.326942	0.144684
			HD	P42858	0.00352568	0.00361784	9.216e-05	0.0731463	0.043985	568766	569492	726	0.126506	0.0518099	0.348697	0.348592	-0.00010453	0.472362	0.0375733
HDAC1			HDAC1	Q13547	0.00910191	0.0092178	0.00011589	0.261523	0.015014	1873696	1820170	-53526	0.12109	0.0136589	0.363169	0.362201	-0.00096807	0.26506	0.0202128
HDAC2			HDAC2	Q92769	0.00427344	0.00428616	1.272e-05	0.284137	0.0362113	884028	855464	-28564	0.130522	0.034924	0.352421	0.350581	-0.0018401	0.232465	0.0353396
			HDAC4	P56524	0.00150875	0.00154768	3.893e-05	0.153307	0.101655	338568	331408	-7160	0.210473	0.0877366	0.334105	0.332689	-0.00141576	0.244734	0.0821187
			HDAC5	Q9UQL6	0.00058174	0.00056901	-1.273e-05	0.131526	0.256931	134400	125224	-9176	0.0520521	0.212819	0.315833	0.31365	-0.0021822	0.219659	0.186951
			HDAC7	Q8WUI4	0.00025292	0.00026529	1.237e-05	0.0766129	0.341597	49846	50980	1134	0.0792377	0.347182	0.312275	0.312228	-4.682e-05	0.384925	0.199619
			HDAC9	Q9UKV0	5.495e-05	5.632e-05	1.37e-06	0.164329	0.482113	10780	10830	50	0.256281	0.480434	0.290785	0.29066	-0.00012514	0.48996	0.368381
			HDHD2	Q9H0R4	6.544e-05	6.72e-05	1.76e-06	0.133803	0.499131	8706	8816	110	0.073663	0.459666	0.26619	0.266223	3.285e-05	0.221328	0.453998
			HEBP2	Q9Y5Z4	1.46e-06	1.46e-06	0	0.128514	0.236243	508	454	-54	0.0351759	0.247092	0.272042	0.270981	-0.00106113	0.230151	0.489429
			HEM6	P36551	0	0	0	1	0.192146	0	0	0	1	0.192946	0.254779	0.254831	5.142e-05	0.19196	0.394841
			HERC1	Q15751	1.844e-05	1.911e-05	6.7e-07	0.105847	0.383042	2630	2598	-32	0.25	0.350606	0.280817	0.280728	-8.941e-05	0.492477	0.439846
			HERC5	Q9UII4	8.052e-05	8.439e-05	3.87e-06	0.0787084	0.477122	19732	20186	454	0.0714286	0.457391	0.305286	0.30525	-3.625e-05	0.348044	0.257419
			HERP1	Q15011	3.925e-05	3.964e-05	3.9e-07	0.458753	0.447334	4956	5024	68	0.0741483	0.40472	0.251597	0.251571	-2.603e-05	0.3857	0.379282
			HES1	Q14469	0.00014806	0.00015854	1.048e-05	0.0511022	0.405482	25698	26132	434	0.108434	0.42847	0.307317	0.307047	-0.00026979	0.359155	0.242904
			HEXI1	O94992	0.00107368	0.00087743	-0.00019625	0.0110775	0.174813	215376	173062	-42314	0.0240722	0.162734	0.311153	0.304064	-0.00708942	0.211111	0.267261
			HEXI2	Q96MH2	0	0	0	1	0.192146	0	0	0	1	0.192946	0.247235	0.245052	-0.00218314	0.219439	0.341528
			HGF	P14210	0.00022147	0.00022983	8.36e-06	0.0812437	0.358255	30816	31130	314	0.133133	0.408238	0.2793	0.279134	-0.00016645	0.412298	0.452237
			HGFL	P26927	1.489e-05	1.385e-05	-1.04e-06	0.0362173	0.352996	3268	2914	-354	0.037336	0.358144	0.255023	0.252365	-0.00265864	0.217871	0.383426
			HGS	O14964	0.0020934	0.0021265	3.31e-05	0.216867	0.0735979	347076	347308	232	0.135815	0.0838781	0.329091	0.328906	-0.0001852	0.439074	0.0982343
			HHIP	Q96QV1	1.11e-06	1.13e-06	2e-08	0.683468	0.228501	138	138	0	0.875627	0.214346	0.187642	0.187657	1.459e-05	0.261616	0.177896
			HIF1A	Q16665	0.00144245	0.00148718	4.473e-05	0.0422535	0.105649	296646	296098	-548	0.15493	0.0986888	0.336342	0.336363	2.029e-05	0.272362	0.0691592
			HINT1	P49773	1.252e-05	1.281e-05	2.9e-07	0.156469	0.348396	2960	2976	16	0.237186	0.360143	0.272749	0.272828	7.941e-05	0.174395	0.497228
			HIP1	O00291	3.242e-05	3.725e-05	4.83e-06	0.00907258	0.440724	6520	6934	414	0.0310933	0.434797	0.298193	0.297931	-0.0002615	0.363454	0.310565
			HIPK2	Q9H2X6	0.00110804	0.0011668	5.876e-05	0.046371	0.134956	202984	209390	6406	0.0592965	0.132931	0.322236	0.322134	-0.00010183	0.469347	0.134173
			HIPK3	Q9H422	0.00138306	0.00140231	1.925e-05	0.170854	0.112775	209156	207690	-1466	0.38794	0.133945	0.313433	0.313393	-3.941e-05	0.357789	0.189261
			HIRA	P54198	0.00117527	0.00118331	8.04e-06	0.323618	0.132971	215428	211958	-3470	0.275654	0.131302	0.275022	0.274986	-3.581e-05	0.377377	0.47959
			HLAE	P13747	0.00036429	0.00036566	1.37e-06	0.264322	0.305942	64104	62894	-1210	0.213494	0.31865	0.27045	0.270321	-0.00012837	0.446787	0.484506
			HLAF	P30511	2.367e-05	2.388e-05	2.1e-07	0.387324	0.404535	8242	8162	-80	0.353769	0.451208	0.265802	0.265627	-0.00017498	0.390735	0.449889
			HLAG	P17693	0.00140939	0.00141509	5.7e-06	0.272636	0.111923	169024	164732	-4292	0.176056	0.170547	0.270239	0.270109	-0.00012957	0.452261	0.48305
			HLTF	Q14527	3.45e-06	3.53e-06	8e-08	0.196177	0.272502	858	874	16	0.0743719	0.27875	0.258949	0.258292	-0.0006572	0.251509	0.41485
			HMGA1	P17096	0.00056209	0.00050486	-5.723e-05	0.00803213	0.270135	108486	87424	-21062	0.0311871	0.277814	0.311601	0.303929	-0.00767136	0.207452	0.268249
			HMGA2	P52926	1.429e-05	1.057e-05	-3.72e-06	0.0151057	0.33523	7210	3666	-3544	0.0100604	0.377009	0.309762	0.300087	-0.00967502	0.211268	0.295061
			HMGB1	P09429	0.00217868	0.00208627	-9.241e-05	0.0481928	0.0756655	371712	330284	-41428	0.0110664	0.0880705	0.331516	0.326782	-0.00473301	0.210632	0.107835
			HMGB2	P26583	0.00041399	0.00046789	5.39e-05	0.00601805	0.280106	70798	74752	3954	0.0141129	0.299834	0.312303	0.312058	-0.00024482	0.392354	0.201389
			HMGN1	P05114	7.515e-05	8.298e-05	7.83e-06	0.0110887	0.479034	20150	21726	1576	0.00909091	0.448532	0.314742	0.314798	5.54e-05	0.222558	0.179235
			HMGN2	P05204	7.69e-05	8.287e-05	5.97e-06	0.0260782	0.479149	32914	34516	1602	0.0411234	0.396231	0.323711	0.32374	2.889e-05	0.270541	0.124687
			HMOX1	P09601	0.00076197	0.00077039	8.42e-06	0.0895372	0.191849	109234	107192	-2042	0.148297	0.239962	0.275656	0.275757	0.00010077	0.12173	0.475816
			HNF1A	P20823	0.00064294	0.00070019	5.725e-05	0.0201005	0.209856	121754	128814	7060	0.0430862	0.208834	0.330063	0.329946	-0.00011655	0.490471	0.0938971
			HNF4A	P41235	0.00048553	0.00050166	1.613e-05	0.0572289	0.270701	88896	89810	914	0.056338	0.272445	0.322086	0.322104	1.78e-05	0.285141	0.13436
			HNRDL	O14979	4.77e-06	4.88e-06	1.1e-07	0.274549	0.292793	1592	1662	70	0.0662651	0.314895	0.28945	0.28939	-5.989e-05	0.415911	0.376963
			HNRH1	P31943	0.00135505	0.00133401	-2.104e-05	0.0763052	0.117542	379294	355812	-23482	0.0384226	0.0817703	0.363474	0.362659	-0.00081489	0.25677	0.0199983
			HNRH3	P31942	0.00018935	0.00019542	6.07e-06	0.118712	0.379988	27538	27736	198	0.144299	0.421298	0.287337	0.286857	-0.00048002	0.299697	0.39237
			HNRPD	Q14103	0.00036133	0.00037875	1.742e-05	0.0512048	0.301945	112382	115964	3582	0.0660661	0.223094	0.346327	0.346313	-1.433e-05	0.34004	0.0419424
			HNRPF	P52597	0.00062503	0.00061327	-1.176e-05	0.100503	0.233567	205380	192432	-12948	0.0441767	0.145578	0.345705	0.343822	-0.00188308	0.235471	0.0472137
			HNRPK	P61978	0.00084419	0.00088558	4.139e-05	0.0360721	0.173303	302872	308122	5250	0.0472362	0.0946241	0.355567	0.355542	-2.518e-05	0.366834	0.0275638
			HNRPM	P52272	0.00060027	0.00055788	-4.239e-05	0.0512563	0.259545	163214	134594	-28620	0.0120361	0.200246	0.332151	0.327653	-0.00449757	0.217435	0.103354
			HNRPQ	O60506	0.00096056	0.00098565	2.509e-05	0.116583	0.157811	271984	271912	-72	0.227772	0.105123	0.341245	0.341197	-4.737e-05	0.366834	0.053439
			HNRPR	O43390	0.00013755	0.00014042	2.87e-06	0.249748	0.420221	40912	41098	186	0.240722	0.37442	0.320507	0.320604	9.669e-05	0.168675	0.144171
			HOME3	Q9NSC5	7.55e-06	7.3e-06	-2.5e-07	0.0623742	0.315082	998	928	-70	0.420523	0.282218	0.271978	0.270789	-0.00118894	0.237952	0.487821
			HPRT	P00492	4.039e-05	4.166e-05	1.27e-06	0.162462	0.452397	28572	29000	428	0.0845921	0.416737	0.295321	0.295045	-0.00027546	0.344724	0.330855
			HPTR	P00739	2.072e-05	2.112e-05	4e-07	0.142142	0.393993	3030	3012	-18	0.472837	0.361483	0.245501	0.245366	-0.00013451	0.401005	0.342837
			HRH1	P35367	0	0	0	1	0.192146	0	0	0	1	0.192946	0.215004	0	-0.215004	0.00704225	0.000850571
			HRH4	Q9H3N8	2.003e-05	2.066e-05	6.3e-07	0.106747	0.390947	4340	4598	258	0.0493952	0.397267	0.246094	0.24591	-0.00018391	0.369849	0.344718
			HRK	O00198	7.69e-06	7.69e-06	0	0.119839	0.316656	2034	1964	-70	0.0763052	0.32693	0.280431	0.280111	-0.00031988	0.335678	0.444719
			HS105	Q92598	0.00028801	0.00025767	-3.034e-05	0.0291165	0.344835	51350	45382	-5968	0.0442211	0.361481	0.321518	0.317762	-0.00375586	0.21608	0.159592
			HS71L	P34931	0.00104799	0.00099342	-5.457e-05	0.0312815	0.156558	368136	316462	-51674	0.0210843	0.0921763	0.349823	0.346626	-0.00319694	0.228686	0.041117
HS90B			HS90B	P08238	0.0101154	0.0102123	9.688e-05	0.341023	0.0124977	2431864	2333928	-97936	0.0382294	0.0103973	0.390423	0.38919	-0.00123213	0.255276	0.0022621
			HSDL1	Q3SXM5	0	0	0	1	0.192146	0	0	0	1	0.192946	0.228321	0.228189	-0.00013222	0.395395	0.270632
			HSDL2	Q6YN16	0	0	0	1	0.192146	0	0	0	1	0.192946	0.268501	0.267402	-0.00109847	0.233701	0.463336
			HSF4	Q9ULV5	6.91e-06	8.21e-06	1.3e-06	0.00903615	0.320179	2572	2956	384	0.0110775	0.359489	0.296053	0.295959	-9.39e-05	0.449246	0.324596
			HSH2D	Q96JZ2	3.1e-07	3.2e-07	1e-08	0.185743	0.201351	36	36	0	0.923695	0.197919	0.256135	0.256063	-7.233e-05	0.496982	0.401081
			HSP71	P08107	0.00182305	0.00189199	6.894e-05	0.0760761	0.0843762	393856	399944	6088	0.0601805	0.0731094	0.352457	0.352411	-4.534e-05	0.374122	0.0322144
			HSP72	P54652	6.164e-05	6.435e-05	2.71e-06	0.0862588	0.495137	17484	17740	256	0.141709	0.474996	0.311713	0.311437	-0.00027601	0.365095	0.207042
			HSP74	P34932	0.00089875	0.00087609	-2.266e-05	0.049049	0.175004	185390	162130	-23260	0.00201005	0.171983	0.328748	0.325177	-0.00357049	0.213131	0.116956
			HSP76	P17066	2.334e-05	1.545e-05	-7.89e-06	0.00803213	0.362292	15576	9180	-6396	0.00100503	0.46412	0.309707	0.304575	-0.00513201	0.217523	0.263057
HSP7C			HSP7C	P11142	0.00968029	0.00955877	-0.00012152	0.0853414	0.0143887	2450342	2290678	-159664	0.00603622	0.0106428	0.394602	0.393461	-0.00114062	0.255814	0.00162954
			HSP7E	Q0VDF9	0	0	0	1	0.192146	0	0	0	1	0.192946	0.238784	0.23868	-0.00010467	0.436181	0.310101
			HSPB1	P04792	0.00095727	0.00097676	1.949e-05	0.218876	0.159103	217446	218374	928	0.171026	0.126927	0.34536	0.34527	-8.997e-05	0.464393	0.0443274
[truncated: 1,949 more rows]

## Sheet: Table S18
Proteins which BC significantly altered after MTX targets removal: Functional Annotiation Clustering ("High" classification stringency , Bonferroni≤0.05)
[truncated: 109 more rows]

[truncated: 2 more sheets: Table S19, Table S20]
